# Supplementary material for: A new model construction based on the knowledge graph for mining elite polyphenotype genes in crops
Source: Front Plant Sci. 2024 Mar 20;15:1361716. doi: 10.3389/fpls.2024.1361716 (PMC10987776; doi:10.3389/fpls.2024.1361716)
Supplement: Supplementary file 1 [file DataSheet_1.xlsx]

## Sheet: Sheet1
Table S1 List of known functional polyphenotype genes
Ensembl plant: https://plants.ensembl.org/index.html search to verify the results
GeneID	Predicted-trait numbers	Predicted-trait	Function_Description	Location	Species	label
AT1G01140	3	{'disease_resistance', 'salt_resistance', 'drought_resistance'}	CBL-interacting protein kinase 9 [Source:NCBI gene (formerly Entrezgene);Acc:839349]	1:64166-67774	Arabidopsis thaliana	known
AT1G01250	2	{'salt_resistance', 'drought_resistance'}	Integrase-type DNA-binding superfamily protein [Source:NCBI gene (formerly Entrezgene);Acc:839322]	1:104440-105330	Arabidopsis thaliana	known
AT1G01340	2	{'disease_resistance', 'salt_resistance'}	cyclic nucleotide gated channel 10 [Source:NCBI gene (formerly Entrezgene);Acc:838832]	1:132270-135924	Arabidopsis thaliana	known
AT1G01360	2	{'salt_resistance', 'drought_resistance'}	regulatory component of ABA receptor 1 [Source:NCBI gene (formerly Entrezgene);Acc:838452]	1:141870-143261	Arabidopsis thaliana	known
AT1G01560	3	{'disease_resistance', 'salt_resistance', 'drought_resistance'}	MAP kinase 11 [Source:NCBI gene (formerly Entrezgene);Acc:839523]	1:202103-204440	Arabidopsis thaliana	known
AT1G01720	5	{'grain_weight_increase', 'disease_resistance', 'drought_resistance', 'plant_height_reduce', 'salt_resistance'}	NAC (No Apical Meristem) domain transcriptional regulator superfamily protein [Source:NCBI gene (formerly Entrezgene);Acc:839265]	1:267993-269819	Arabidopsis thaliana	known
AT1G01750	2	{'disease_resistance', 'insect_resistance'}	actin depolymerizing factor 11 [Source:NCBI gene (formerly Entrezgene);Acc:839281]	1:275188-276310	Arabidopsis thaliana	known
AT1G02190	2	{'salt_resistance', 'drought_resistance'}	Fatty acid hydroxylase superfamily [Source:NCBI gene (formerly Entrezgene);Acc:839541]	1:415074-418027	Arabidopsis thaliana	known
AT1G02205	2	{'salt_resistance', 'drought_resistance'}	Fatty acid hydroxylase superfamily [Source:NCBI gene (formerly Entrezgene);Acc:837602]	1:418416-422579	Arabidopsis thaliana	known
AT1G02730	3	{'disease_resistance', 'salt_resistance', 'drought_resistance'}	cellulose synthase-like D5 [Source:NCBI gene (formerly Entrezgene);Acc:839467]	1:594502-598657	Arabidopsis thaliana	known
AT1G02850	2	{'disease_resistance', 'salt_resistance'}	beta glucosidase 11 [Source:NCBI gene (formerly Entrezgene);Acc:839435]	1:630374-633420	Arabidopsis thaliana	known
AT1G03055	2	{'disease_resistance', 'plant_height_reduce'}	beta-carotene isomerase D27-like protein [Source:NCBI gene (formerly Entrezgene);Acc:838334]	1:710018-711857	Arabidopsis thaliana	known
AT1G03060	2	{'disease_resistance', 'salt_resistance'}	BEACH-DOMAIN HOMOLOG A1 [Source:NCBI gene (formerly Entrezgene);Acc:839323]	1:712440-727553	Arabidopsis thaliana	known
AT1G03800	3	{'disease_resistance', 'salt_resistance', 'drought_resistance'}	ERF domain protein 10 [Source:NCBI gene (formerly Entrezgene);Acc:839173]	1:957104-958383	Arabidopsis thaliana	known
AT1G04120	2	{'salt_resistance', 'drought_resistance'}	multidrug resistance-associated protein 5 [Source:NCBI gene (formerly Entrezgene);Acc:839277]	1:1064264-1071080	Arabidopsis thaliana	known
AT1G05010	2	{'salt_resistance', 'insect_resistance'}	ethylene-forming enzyme [Source:NCBI gene (formerly Entrezgene);Acc:839345]	1:1431177-1433010	Arabidopsis thaliana	known
AT1G06160	2	{'salt_resistance', 'drought_resistance'}	octadecanoid-responsive AP2/ERF 59 [Source:NCBI gene (formerly Entrezgene);Acc:837125]	1:1882907-1883992	Arabidopsis thaliana	known
AT1G06180	3	{'salt_resistance', 'insect_resistance', 'drought_resistance'}	myb domain protein 13 [Source:NCBI gene (formerly Entrezgene);Acc:837127]	1:1889362-1891276	Arabidopsis thaliana	known
AT1G06260	3	{'disease_resistance', 'salt_resistance', 'drought_resistance'}	Cysteine proteinases superfamily protein [Source:NCBI gene (formerly Entrezgene);Acc:837137]	1:1916430-1917585	Arabidopsis thaliana	known
AT1G06390	3	{'disease_resistance', 'salt_resistance', 'drought_resistance'}	GSK3/SHAGGY-like protein kinase 1 [Source:NCBI gene (formerly Entrezgene);Acc:837150]	1:1946746-1950860	Arabidopsis thaliana	known
AT1G06840	2	{'disease_resistance', 'salt_resistance'}	Leucine-rich repeat protein kinase family protein [Source:NCBI gene (formerly Entrezgene);Acc:837196]	1:2097747-2103507	Arabidopsis thaliana	known
AT1G07160	3	{'disease_resistance', 'salt_resistance', 'drought_resistance'}	Protein phosphatase 2C family protein [Source:NCBI gene (formerly Entrezgene);Acc:837227]	1:2197854-2199773	Arabidopsis thaliana	known
AT1G07400	2	{'disease_resistance', 'salt_resistance'}	HSP20-like chaperones superfamily protein [Source:NCBI gene (formerly Entrezgene);Acc:837252]	1:2274926-2275783	Arabidopsis thaliana	known
AT1G07420	2	{'disease_resistance', 'drought_resistance'}	sterol 4-alpha-methyl-oxidase 2-1 [Source:NCBI gene (formerly Entrezgene);Acc:837254]	1:2277555-2280502	Arabidopsis thaliana	known
AT1G07430	3	{'disease_resistance', 'salt_resistance', 'drought_resistance'}	highly ABA-induced PP2C protein 2 [Source:NCBI gene (formerly Entrezgene);Acc:837255]	1:2280746-2282828	Arabidopsis thaliana	known
AT1G07880	3	{'disease_resistance', 'salt_resistance', 'drought_resistance'}	Protein kinase superfamily protein [Source:NCBI gene (formerly Entrezgene);Acc:837303]	1:2433896-2435858	Arabidopsis thaliana	known
AT1G08720	2	{'disease_resistance', 'drought_resistance'}	Protein kinase superfamily protein [Source:NCBI gene (formerly Entrezgene);Acc:837393]	1:2773941-2779308	Arabidopsis thaliana	known
AT1G08810	3	{'salt_resistance', 'insect_resistance', 'drought_resistance'}	myb domain protein 60 [Source:NCBI gene (formerly Entrezgene);Acc:837403]	1:2819065-2820478	Arabidopsis thaliana	known
AT1G09400	2	{'salt_resistance', 'drought_resistance'}	FMN-linked oxidoreductases superfamily protein [Source:NCBI gene (formerly Entrezgene);Acc:837462]	1:3033512-3035396	Arabidopsis thaliana	known
AT1G09540	4	{'disease_resistance', 'salt_resistance', 'insect_resistance', 'drought_resistance'}	myb domain protein 61 [Source:NCBI gene (formerly Entrezgene);Acc:837480]	1:3086101-3087914	Arabidopsis thaliana	known
AT1G09850	3	{'disease_resistance', 'salt_resistance', 'drought_resistance'}	xylem bark cysteine peptidase 3 [Source:NCBI gene (formerly Entrezgene);Acc:837517]	1:3201685-3204150	Arabidopsis thaliana	known
AT1G10210	3	{'disease_resistance', 'salt_resistance', 'drought_resistance'}	mitogen-activated protein kinase 1 [Source:NCBI gene (formerly Entrezgene);Acc:837559]	1:3349082-3351180	Arabidopsis thaliana	known
AT1G10940	3	{'disease_resistance', 'salt_resistance', 'drought_resistance'}	Protein kinase superfamily protein [Source:NCBI gene (formerly Entrezgene);Acc:837637]	1:3655673-3658612	Arabidopsis thaliana	known
AT1G11280	2	{'disease_resistance', 'salt_resistance'}	S-locus lectin protein kinase family protein [Source:NCBI gene (formerly Entrezgene);Acc:837670]	1:3787318-3790935	Arabidopsis thaliana	known
AT1G11300	3	{'disease_resistance', 'salt_resistance', 'drought_resistance'}	G-type lectin S-receptor-like Serine/Threonine-kinase [Source:NCBI gene (formerly Entrezgene);Acc:837672]	1:3794243-3797507	Arabidopsis thaliana	known
AT1G11330	2	{'disease_resistance', 'salt_resistance'}	S-locus lectin protein kinase family protein [Source:NCBI gene (formerly Entrezgene);Acc:837675]	1:3809795-3813809	Arabidopsis thaliana	known
AT1G11340	3	{'disease_resistance', 'salt_resistance', 'drought_resistance'}	G-type lectin S-receptor-like Serine/Threonine-kinase [Source:NCBI gene (formerly Entrezgene);Acc:837676]	1:3813907-3817420	Arabidopsis thaliana	known
AT1G11350	3	{'disease_resistance', 'salt_resistance', 'drought_resistance'}	S-domain-1 13 [Source:NCBI gene (formerly Entrezgene);Acc:837677]	1:3817424-3820887	Arabidopsis thaliana	known
AT1G11410	3	{'disease_resistance', 'salt_resistance', 'drought_resistance'}	S-locus lectin protein kinase family protein [Source:NCBI gene (formerly Entrezgene);Acc:837683]	1:3840877-3844479	Arabidopsis thaliana	known
AT1G11840	2	{'disease_resistance', 'salt_resistance'}	glyoxalase/bleomycin resistance protein/dioxygenase superfamily protein [Source:NCBI gene (formerly Entrezgene);Acc:837731]	1:3995158-3997965	Arabidopsis thaliana	known
AT1G12010	2	{'salt_resistance', 'insect_resistance'}	2-oxoglutarate (2OG) and Fe(II)-dependent oxygenase superfamily protein [Source:NCBI gene (formerly Entrezgene);Acc:837753]	1:4056165-4057968	Arabidopsis thaliana	known
AT1G12260	4	{'disease_resistance', 'grain_weight_increase', 'salt_resistance', 'drought_resistance'}	NAC 007 [Source:NCBI gene (formerly Entrezgene);Acc:837780]	1:4162826-4165928	Arabidopsis thaliana	known
AT1G12740	2	{'disease_resistance', 'grain_weight_increase'}	cytochrome P450, family 87, subfamily A, polypeptide 2 [Source:NCBI gene (formerly Entrezgene);Acc:837830]	1:4342209-4344875	Arabidopsis thaliana	known
AT1G12890	2	{'salt_resistance', 'drought_resistance'}	Integrase-type DNA-binding superfamily protein [Source:NCBI gene (formerly Entrezgene);Acc:837847]	1:4391671-4392393	Arabidopsis thaliana	known
AT1G12980	2	{'salt_resistance', 'drought_resistance'}	Integrase-type DNA-binding superfamily protein [Source:NCBI gene (formerly Entrezgene);Acc:837856]	1:4429718-4430965	Arabidopsis thaliana	known
AT1G13270	2	{'salt_resistance', 'insect_resistance'}	methionine aminopeptidase 1B [Source:NCBI gene (formerly Entrezgene);Acc:837887]	1:4544889-4547373	Arabidopsis thaliana	known
AT1G13280	2	{'salt_resistance', 'insect_resistance'}	allene oxide cyclase 4 [Source:NCBI gene (formerly Entrezgene);Acc:837888]	1:4547388-4548894	Arabidopsis thaliana	known
AT1G13930	2	{'disease_resistance', 'salt_resistance'}	oleosin-B3-like protein [Source:NCBI gene (formerly Entrezgene);Acc:837953]	1:4760957-4762666	Arabidopsis thaliana	known
AT1G13960	2	{'disease_resistance', 'salt_resistance'}	WRKY DNA-binding protein 4 [Source:NCBI gene (formerly Entrezgene);Acc:837956]	1:4776283-4779420	Arabidopsis thaliana	known
AT1G14920	3	{'grain_weight_increase', 'salt_resistance', 'plant_height_reduce'}	GRAS family transcription factor family protein [Source:NCBI gene (formerly Entrezgene);Acc:838057]	1:5148982-5151415	Arabidopsis thaliana	known
AT1G15210	4	{'disease_resistance', 'salt_resistance', 'insect_resistance', 'drought_resistance'}	pleiotropic drug resistance 7 [Source:NCBI gene (formerly Entrezgene);Acc:838087]	1:5231345-5236886	Arabidopsis thaliana	known
AT1G15360	2	{'salt_resistance', 'drought_resistance'}	Integrase-type DNA-binding superfamily protein [Source:NCBI gene (formerly Entrezgene);Acc:838105]	1:5283268-5284736	Arabidopsis thaliana	known
AT1G15380	2	{'salt_resistance', 'drought_resistance'}	Lactoylglutathione lyase / glyoxalase I family protein [Source:NCBI gene (formerly Entrezgene);Acc:838107]	1:5290582-5292582	Arabidopsis thaliana	known
AT1G15520	4	{'disease_resistance', 'salt_resistance', 'insect_resistance', 'drought_resistance'}	pleiotropic drug resistance 12 [Source:NCBI gene (formerly Entrezgene);Acc:838122]	1:5331858-5338326	Arabidopsis thaliana	known
AT1G15530	3	{'disease_resistance', 'salt_resistance', 'plant_height_reduce'}	Concanavalin A-like lectin protein kinase family protein [Source:NCBI gene (formerly Entrezgene);Acc:838123]	1:5339961-5341931	Arabidopsis thaliana	known
AT1G15990	2	{'disease_resistance', 'salt_resistance'}	cyclic nucleotide gated channel 7 [Source:NCBI gene (formerly Entrezgene);Acc:838169]	1:5491133-5494192	Arabidopsis thaliana	known
AT1G16130	2	{'disease_resistance', 'drought_resistance'}	wall associated kinase-like 2 [Source:NCBI gene (formerly Entrezgene);Acc:838182]	1:5525293-5528212	Arabidopsis thaliana	known
AT1G16490	2	{'salt_resistance', 'insect_resistance'}	myb domain protein 58 [Source:NCBI gene (formerly Entrezgene);Acc:838219]	1:5629655-5631088	Arabidopsis thaliana	known
AT1G17230	3	{'disease_resistance', 'grain_weight_increase', 'insect_resistance'}	Leucine-rich receptor-like protein kinase family protein [Source:NCBI gene (formerly Entrezgene);Acc:838294]	1:5890616-5895141	Arabidopsis thaliana	known
AT1G17420	2	{'disease_resistance', 'insect_resistance'}	lipoxygenase 3 [Source:NCBI gene (formerly Entrezgene);Acc:838314]	1:5977323-5981521	Arabidopsis thaliana	known
AT1G17550	3	{'disease_resistance', 'salt_resistance', 'drought_resistance'}	homology to ABI2 [Source:NCBI gene (formerly Entrezgene);Acc:838330]	1:6034270-6037398	Arabidopsis thaliana	known
AT1G17950	2	{'salt_resistance', 'drought_resistance'}	myb domain protein 52 [Source:NCBI gene (formerly Entrezgene);Acc:838374]	1:6177481-6179289	Arabidopsis thaliana	known
AT1G17990	2	{'salt_resistance', 'drought_resistance'}	FMN-linked oxidoreductases superfamily protein [Source:NCBI gene (formerly Entrezgene);Acc:838379]	1:6192033-6194093	Arabidopsis thaliana	known
AT1G18020	2	{'salt_resistance', 'drought_resistance'}	FMN-linked oxidoreductases superfamily protein [Source:NCBI gene (formerly Entrezgene);Acc:838382]	1:6202235-6204234	Arabidopsis thaliana	known
AT1G18040	3	{'disease_resistance', 'salt_resistance', 'drought_resistance'}	cyclin-dependent kinase D1;3 [Source:NCBI gene (formerly Entrezgene);Acc:838384]	1:6206871-6209528	Arabidopsis thaliana	known
AT1G18150	3	{'disease_resistance', 'salt_resistance', 'drought_resistance'}	Protein kinase superfamily protein [Source:NCBI gene (formerly Entrezgene);Acc:838394]	1:6244298-6247830	Arabidopsis thaliana	known
AT1G18160	2	{'disease_resistance', 'drought_resistance'}	Protein kinase superfamily protein [Source:NCBI gene (formerly Entrezgene);Acc:838395]	1:6248619-6254080	Arabidopsis thaliana	known
AT1G18350	3	{'disease_resistance', 'salt_resistance', 'drought_resistance'}	MAP kinase kinase 7 [Source:NCBI gene (formerly Entrezgene);Acc:838416]	1:6315636-6316738	Arabidopsis thaliana	known
AT1G18390	2	{'disease_resistance', 'drought_resistance'}	Serine/Threonine kinase family catalytic domain protein [Source:NCBI gene (formerly Entrezgene);Acc:838420]	1:6325536-6330179	Arabidopsis thaliana	known
AT1G18570	3	{'salt_resistance', 'insect_resistance', 'drought_resistance'}	myb domain protein 51 [Source:NCBI gene (formerly Entrezgene);Acc:838438]	1:6389399-6391386	Arabidopsis thaliana	known
AT1G18890	2	{'disease_resistance', 'salt_resistance'}	calcium-dependent protein kinase 1 [Source:NCBI gene (formerly Entrezgene);Acc:838470]	1:6522764-6526075	Arabidopsis thaliana	known
AT1G19780	2	{'disease_resistance', 'salt_resistance'}	cyclic nucleotide gated channel 8 [Source:NCBI gene (formerly Entrezgene);Acc:838566]	1:6833669-6836633	Arabidopsis thaliana	known
AT1G20620	2	{'salt_resistance', 'drought_resistance'}	catalase 3 [Source:NCBI gene (formerly Entrezgene);Acc:838651]	1:7142972-7146540	Arabidopsis thaliana	known
AT1G20630	2	{'salt_resistance', 'drought_resistance'}	catalase 1 [Source:NCBI gene (formerly Entrezgene);Acc:838652]	1:7146636-7150180	Arabidopsis thaliana	known
AT1G20693	2	{'salt_resistance', 'drought_resistance'}	high mobility group B2 [Source:NCBI gene (formerly Entrezgene);Acc:838658]	1:7176747-7178895	Arabidopsis thaliana	known
AT1G20696	2	{'salt_resistance', 'drought_resistance'}	high mobility group B3 [Source:NCBI gene (formerly Entrezgene);Acc:838659]	1:7179273-7181574	Arabidopsis thaliana	known
AT1G20850	3	{'disease_resistance', 'salt_resistance', 'drought_resistance'}	xylem cysteine peptidase 2 [Source:NCBI gene (formerly Entrezgene);Acc:838677]	1:7252111-7253747	Arabidopsis thaliana	known
AT1G20930	3	{'disease_resistance', 'salt_resistance', 'drought_resistance'}	cyclin-dependent kinase B2;2 [Source:NCBI gene (formerly Entrezgene);Acc:838687]	1:7292389-7294746	Arabidopsis thaliana	known
AT1G20980	3	{'disease_resistance', 'grain_weight_increase', 'plant_height_reduce'}	squamosa promoter binding protein-like 14 [Source:NCBI gene (formerly Entrezgene);Acc:838692]	1:7324471-7329441	Arabidopsis thaliana	known
AT1G21210	2	{'disease_resistance', 'drought_resistance'}	wall associated kinase 4 [Source:NCBI gene (formerly Entrezgene);Acc:838716]	1:7423704-7427041	Arabidopsis thaliana	known
AT1G21230	2	{'disease_resistance', 'drought_resistance'}	wall associated kinase 5 [Source:NCBI gene (formerly Entrezgene);Acc:838718]	1:7429895-7432477	Arabidopsis thaliana	known
AT1G21240	2	{'disease_resistance', 'drought_resistance'}	wall associated kinase 3 [Source:NCBI gene (formerly Entrezgene);Acc:838719]	1:7434235-7436830	Arabidopsis thaliana	known
AT1G21250	2	{'disease_resistance', 'drought_resistance'}	cell wall-associated kinase [Source:NCBI gene (formerly Entrezgene);Acc:838721]	1:7439171-7442113	Arabidopsis thaliana	known
AT1G21270	2	{'disease_resistance', 'drought_resistance'}	wall-associated kinase 2 [Source:NCBI gene (formerly Entrezgene);Acc:838723]	1:7444749-7448483	Arabidopsis thaliana	known
AT1G22190	2	{'salt_resistance', 'drought_resistance'}	Integrase-type DNA-binding superfamily protein [Source:NCBI gene (formerly Entrezgene);Acc:838824]	1:7835781-7837411	Arabidopsis thaliana	known
AT1G22430	2	{'disease_resistance', 'salt_resistance'}	GroES-like zinc-binding dehydrogenase family protein [Source:NCBI gene (formerly Entrezgene);Acc:838849]	1:7919077-7921893	Arabidopsis thaliana	known
AT1G22440	2	{'disease_resistance', 'salt_resistance'}	Zinc-binding alcohol dehydrogenase family protein [Source:NCBI gene (formerly Entrezgene);Acc:838850]	1:7922276-7925097	Arabidopsis thaliana	known
AT1G22640	3	{'salt_resistance', 'insect_resistance', 'drought_resistance'}	myb domain protein 3 [Source:NCBI gene (formerly Entrezgene);Acc:838870]	1:8006064-8007465	Arabidopsis thaliana	known
AT1G24260	2	{'disease_resistance', 'plant_height_reduce'}	K-box region and MADS-box transcription factor family protein [Source:NCBI gene (formerly Entrezgene);Acc:839040]	1:8593536-8596123	Arabidopsis thaliana	known
AT1G24590	2	{'salt_resistance', 'drought_resistance'}	DORNROSCHEN-like protein [Source:NCBI gene (formerly Entrezgene);Acc:839073]	1:8714365-8715378	Arabidopsis thaliana	known
AT1G25390	2	{'disease_resistance', 'drought_resistance'}	Protein kinase superfamily protein [Source:NCBI gene (formerly Entrezgene);Acc:839125]	1:8906029-8909334	Arabidopsis thaliana	known
AT1G25540	2	{'disease_resistance', 'drought_resistance'}	phytochrome and flowering time regulatory protein (PFT1) [Source:NCBI gene (formerly Entrezgene);Acc:839141]	1:8969065-8974815	Arabidopsis thaliana	known
AT1G26310	2	{'disease_resistance', 'plant_height_reduce'}	K-box region and MADS-box transcription factor family protein [Source:NCBI gene (formerly Entrezgene);Acc:839172]	1:9099994-9103644	Arabidopsis thaliana	known
AT1G26560	2	{'disease_resistance', 'salt_resistance'}	beta glucosidase 40 [Source:NCBI gene (formerly Entrezgene);Acc:839196]	1:9178212-9181967	Arabidopsis thaliana	known
AT1G26780	2	{'salt_resistance', 'drought_resistance'}	myb domain protein 117 [Source:NCBI gene (formerly Entrezgene);Acc:839219]	1:9270952-9272713	Arabidopsis thaliana	known
AT1G26870	3	{'disease_resistance', 'salt_resistance', 'drought_resistance'}	NAC (No Apical Meristem) domain transcriptional regulator superfamily protein [Source:NCBI gene (formerly Entrezgene);Acc:837796]	1:9312936-9315122	Arabidopsis thaliana	known
AT1G26970	2	{'disease_resistance', 'grain_weight_increase'}	Protein kinase superfamily protein [Source:NCBI gene (formerly Entrezgene);Acc:839588]	1:9359325-9361833	Arabidopsis thaliana	known
AT1G27370	3	{'disease_resistance', 'grain_weight_increase', 'plant_height_reduce'}	squamosa promoter binding protein-like 10 [Source:NCBI gene (formerly Entrezgene);Acc:839626]	1:9505112-9508542	Arabidopsis thaliana	known
AT1G28160	2	{'salt_resistance', 'drought_resistance'}	Integrase-type DNA-binding superfamily protein [Source:NCBI gene (formerly Entrezgene);Acc:839710]	1:9839316-9840124	Arabidopsis thaliana	known
AT1G28360	2	{'salt_resistance', 'drought_resistance'}	ERF domain protein 12 [Source:NCBI gene (formerly Entrezgene);Acc:839732]	1:9951762-9953105	Arabidopsis thaliana	known
AT1G28370	2	{'salt_resistance', 'drought_resistance'}	ERF domain protein 11 [Source:NCBI gene (formerly Entrezgene);Acc:839733]	1:9955774-9956980	Arabidopsis thaliana	known
AT1G28440	2	{'disease_resistance', 'insect_resistance'}	HAESA-like 1 [Source:NCBI gene (formerly Entrezgene);Acc:839742]	1:9996713-10000455	Arabidopsis thaliana	known
AT1G29080	3	{'disease_resistance', 'salt_resistance', 'drought_resistance'}	Papain family cysteine protease [Source:NCBI gene (formerly Entrezgene);Acc:839783]	1:10157494-10158805	Arabidopsis thaliana	known
AT1G29090	3	{'disease_resistance', 'salt_resistance', 'drought_resistance'}	Cysteine proteinases superfamily protein [Source:NCBI gene (formerly Entrezgene);Acc:839784]	1:10162795-10164452	Arabidopsis thaliana	known
AT1G29230	3	{'disease_resistance', 'salt_resistance', 'drought_resistance'}	CBL-interacting protein kinase 18 [Source:NCBI gene (formerly Entrezgene);Acc:839797]	1:10214681-10216563	Arabidopsis thaliana	known
AT1G29660	2	{'disease_resistance', 'drought_resistance'}	GDSL-like Lipase/Acylhydrolase superfamily protein [Source:NCBI gene (formerly Entrezgene);Acc:839843]	1:10371675-10374005	Arabidopsis thaliana	known
AT1G29670	2	{'disease_resistance', 'drought_resistance'}	GDSL-like Lipase/Acylhydrolase superfamily protein [Source:NCBI gene (formerly Entrezgene);Acc:839844]	1:10375599-10377871	Arabidopsis thaliana	known
AT1G30100	3	{'disease_resistance', 'salt_resistance', 'drought_resistance'}	nine-cis-epoxycarotenoid dioxygenase 5 [Source:NCBI gene (formerly Entrezgene);Acc:839889]	1:10571310-10573365	Arabidopsis thaliana	known
AT1G30270	3	{'disease_resistance', 'salt_resistance', 'drought_resistance'}	CBL-interacting protein kinase 23 [Source:NCBI gene (formerly Entrezgene);Acc:839907]	1:10654800-10658924	Arabidopsis thaliana	known
AT1G30400	2	{'salt_resistance', 'drought_resistance'}	multidrug resistance-associated protein 1 [Source:NCBI gene (formerly Entrezgene);Acc:839920]	1:10727317-10738092	Arabidopsis thaliana	known
AT1G30410	2	{'salt_resistance', 'drought_resistance'}	multidrug resistance-associated protein 13 [Source:NCBI gene (formerly Entrezgene);Acc:839921]	1:10738683-10747563	Arabidopsis thaliana	known
AT1G30420	2	{'salt_resistance', 'drought_resistance'}	multidrug resistance-associated protein 12 [Source:NCBI gene (formerly Entrezgene);Acc:839922]	1:10748261-10756695	Arabidopsis thaliana	known
AT1G30490	2	{'disease_resistance', 'drought_resistance'}	Homeobox-leucine zipper family protein / lipid-binding START domain-containing protein [Source:NCBI gene (formerly Entrezgene);Acc:839928]	1:10796124-10801093	Arabidopsis thaliana	known
AT1G30580	2	{'disease_resistance', 'salt_resistance'}	GTP binding protein [Source:NCBI gene (formerly Entrezgene);Acc:839938]	1:10831673-10835635	Arabidopsis thaliana	known
AT1G31420	2	{'disease_resistance', 'grain_weight_increase'}	Leucine-rich repeat protein kinase family protein [Source:NCBI gene (formerly Entrezgene);Acc:840032]	1:11249600-11253915	Arabidopsis thaliana	known
AT1G32180	3	{'disease_resistance', 'salt_resistance', 'drought_resistance'}	cellulose synthase-like D6 [Source:NCBI gene (formerly Entrezgene);Acc:840110]	1:11586391-11590035	Arabidopsis thaliana	known
AT1G32320	3	{'disease_resistance', 'salt_resistance', 'drought_resistance'}	MAP kinase kinase 10 [Source:NCBI gene (formerly Entrezgene);Acc:840124]	1:11655156-11656073	Arabidopsis thaliana	known
AT1G32770	2	{'salt_resistance', 'drought_resistance'}	NAC domain containing protein 12 [Source:NCBI gene (formerly Entrezgene);Acc:840171]	1:11865229-11867154	Arabidopsis thaliana	known
AT1G32780	2	{'disease_resistance', 'salt_resistance'}	GroES-like zinc-binding dehydrogenase family protein [Source:NCBI gene (formerly Entrezgene);Acc:840172]	1:11869752-11872926	Arabidopsis thaliana	known
AT1G33060	2	{'salt_resistance', 'drought_resistance'}	NAC 014 [Source:NCBI gene (formerly Entrezgene);Acc:840202]	1:11975307-11978622	Arabidopsis thaliana	known
AT1G33280	3	{'disease_resistance', 'salt_resistance', 'drought_resistance'}	NAC domain containing protein 15 [Source:NCBI gene (formerly Entrezgene);Acc:840223]	1:12072611-12073965	Arabidopsis thaliana	known
AT1G34110	3	{'disease_resistance', 'plant_height_reduce', 'insect_resistance'}	Leucine-rich receptor-like protein kinase family protein [Source:NCBI gene (formerly Entrezgene);Acc:840310]	1:12417012-12421792	Arabidopsis thaliana	known
AT1G34190	2	{'salt_resistance', 'drought_resistance'}	NAC domain containing protein 17 [Source:NCBI gene (formerly Entrezgene);Acc:840318]	1:12451405-12454542	Arabidopsis thaliana	known
AT1G34210	2	{'disease_resistance', 'grain_weight_increase'}	somatic embryosis receptor-like kinase 2 [Source:NCBI gene (formerly Entrezgene);Acc:840320]	1:12458564-12462905	Arabidopsis thaliana	known
AT1G34670	3	{'salt_resistance', 'insect_resistance', 'drought_resistance'}	myb domain protein 93 [Source:NCBI gene (formerly Entrezgene);Acc:840371]	1:12709090-12710665	Arabidopsis thaliana	known
AT1G35440	2	{'disease_resistance', 'salt_resistance'}	cyclin T1;1 [Source:NCBI gene (formerly Entrezgene);Acc:840436]	1:13035294-13036037	Arabidopsis thaliana	known
AT1G35515	2	{'salt_resistance', 'insect_resistance'}	high response to osmotic stress 10 [Source:NCBI gene (formerly Entrezgene);Acc:840446]	1:13077890-13080265	Arabidopsis thaliana	known
AT1G35670	2	{'disease_resistance', 'salt_resistance'}	calcium-dependent protein kinase 2 [Source:NCBI gene (formerly Entrezgene);Acc:840471]	1:13205345-13208289	Arabidopsis thaliana	known
AT1G35710	3	{'disease_resistance', 'plant_height_reduce', 'insect_resistance'}	kinase family with leucine-rich repeat domain-containing protein [Source:NCBI gene (formerly Entrezgene);Acc:840475]	1:13220471-13224681	Arabidopsis thaliana	known
AT1G36060	3	{'disease_resistance', 'salt_resistance', 'drought_resistance'}	Integrase-type DNA-binding superfamily protein [Source:NCBI gene (formerly Entrezgene);Acc:840510]	1:13454496-13456336	Arabidopsis thaliana	known
AT1G43160	3	{'disease_resistance', 'salt_resistance', 'drought_resistance'}	related to AP2 6 [Source:NCBI gene (formerly Entrezgene);Acc:840915]	1:16263805-16264945	Arabidopsis thaliana	known
AT1G43170	3	{'disease_resistance', 'salt_resistance', 'drought_resistance'}	ribosomal protein 1 [Source:NCBI gene (formerly Entrezgene);Acc:840916]	1:16266553-16268945	Arabidopsis thaliana	known
AT1G45191	2	{'disease_resistance', 'salt_resistance'}	Glycosyl hydrolase superfamily protein [Source:NCBI gene (formerly Entrezgene);Acc:841088]	1:17115762-17119246	Arabidopsis thaliana	known
AT1G45249	2	{'salt_resistance', 'drought_resistance'}	abscisic acid responsive elements-binding factor 2 [Source:NCBI gene (formerly Entrezgene);Acc:841095]	1:17165125-17167924	Arabidopsis thaliana	known
AT1G47128	3	{'disease_resistance', 'salt_resistance', 'drought_resistance'}	Granulin repeat cysteine protease family protein [Source:NCBI gene (formerly Entrezgene);Acc:841122]	1:17282749-17285749	Arabidopsis thaliana	known
AT1G47370	2	{'disease_resistance', 'insect_resistance'}	Toll-Interleukin-Resistance (TIR) domain family protein [Source:NCBI gene (formerly Entrezgene);Acc:841140]	1:17365898-17368703	Arabidopsis thaliana	known
AT1G47600	2	{'disease_resistance', 'salt_resistance'}	beta glucosidase 34 [Source:NCBI gene (formerly Entrezgene);Acc:841169]	1:17491731-17494779	Arabidopsis thaliana	known
AT1G48260	3	{'disease_resistance', 'salt_resistance', 'drought_resistance'}	CBL-interacting protein kinase 17 [Source:NCBI gene (formerly Entrezgene);Acc:841246]	1:17813886-17817441	Arabidopsis thaliana	known
AT1G48470	2	{'grain_weight_increase', 'plant_height_reduce'}	glutamine synthetase 1;5 [Source:NCBI gene (formerly Entrezgene);Acc:841268]	1:17913711-17916101	Arabidopsis thaliana	known
AT1G49720	2	{'salt_resistance', 'drought_resistance'}	abscisic acid responsive element-binding factor 1 [Source:NCBI gene (formerly Entrezgene);Acc:841395]	1:18400003-18402628	Arabidopsis thaliana	known
AT1G50640	2	{'salt_resistance', 'drought_resistance'}	ethylene responsive element binding factor 3 [Source:NCBI gene (formerly Entrezgene);Acc:841486]	1:18756972-18758708	Arabidopsis thaliana	known
AT1G50700	2	{'disease_resistance', 'salt_resistance'}	calcium-dependent protein kinase 33 [Source:NCBI gene (formerly Entrezgene);Acc:841492]	1:18781764-18784582	Arabidopsis thaliana	known
AT1G51470	2	{'disease_resistance', 'salt_resistance'}	beta glucosidase 35 [Source:NCBI gene (formerly Entrezgene);Acc:841572]	1:19087384-19090523	Arabidopsis thaliana	known
AT1G51660	3	{'disease_resistance', 'salt_resistance', 'drought_resistance'}	mitogen-activated protein kinase kinase 4 [Source:NCBI gene (formerly Entrezgene);Acc:841591]	1:19154323-19156338	Arabidopsis thaliana	known
AT1G51850	2	{'disease_resistance', 'drought_resistance'}	Leucine-rich repeat protein kinase family protein [Source:NCBI gene (formerly Entrezgene);Acc:841612]	1:19252811-19256927	Arabidopsis thaliana	known
AT1G51890	2	{'disease_resistance', 'grain_weight_increase'}	Leucine-rich repeat protein kinase family protein [Source:NCBI gene (formerly Entrezgene);Acc:841616]	1:19274604-19278798	Arabidopsis thaliana	known
AT1G52150	2	{'disease_resistance', 'drought_resistance'}	Homeobox-leucine zipper family protein / lipid-binding START domain-containing protein [Source:NCBI gene (formerly Entrezgene);Acc:841645]	1:19409688-19414764	Arabidopsis thaliana	known
AT1G52400	2	{'salt_resistance', 'insect_resistance'}	beta glucosidase 18 [Source:NCBI gene (formerly Entrezgene);Acc:841670]	1:19514989-19518411	Arabidopsis thaliana	known
AT1G52570	2	{'salt_resistance', 'drought_resistance'}	phospholipase D alpha 2 [Source:NCBI gene (formerly Entrezgene);Acc:841689]	1:19583617-19587531	Arabidopsis thaliana	known
AT1G52827	2	{'salt_resistance', 'drought_resistance'}	cadmium tolerance 1 [Source:NCBI gene (formerly Entrezgene);Acc:2745823]	1:19671300-19672021	Arabidopsis thaliana	known
AT1G52880	5	{'grain_weight_increase', 'disease_resistance', 'drought_resistance', 'plant_height_reduce', 'salt_resistance'}	NAC (No Apical Meristem) domain transcriptional regulator superfamily protein [Source:NCBI gene (formerly Entrezgene);Acc:841721]	1:19688708-19690589	Arabidopsis thaliana	known
AT1G52890	4	{'disease_resistance', 'grain_weight_increase', 'salt_resistance', 'drought_resistance'}	NAC domain containing protein 19 [Source:NCBI gene (formerly Entrezgene);Acc:841722]	1:19696923-19698482	Arabidopsis thaliana	known
AT1G53165	3	{'disease_resistance', 'salt_resistance', 'drought_resistance'}	Protein kinase superfamily protein [Source:NCBI gene (formerly Entrezgene);Acc:841750]	1:19813790-19819564	Arabidopsis thaliana	known
AT1G53170	2	{'salt_resistance', 'drought_resistance'}		1:19821337-19822399	Arabidopsis thaliana	known
AT1G53510	3	{'disease_resistance', 'salt_resistance', 'drought_resistance'}	mitogen-activated protein kinase 18 [Source:NCBI gene (formerly Entrezgene);Acc:841786]	1:19970334-19974393	Arabidopsis thaliana	known
AT1G53540	2	{'disease_resistance', 'salt_resistance'}	HSP20-like chaperones superfamily protein [Source:NCBI gene (formerly Entrezgene);Acc:841789]	1:19980299-19981199	Arabidopsis thaliana	known
AT1G55020	2	{'disease_resistance', 'insect_resistance'}	lipoxygenase 1 [Source:NCBI gene (formerly Entrezgene);Acc:841944]	1:20525654-20530468	Arabidopsis thaliana	known
AT1G55180	2	{'salt_resistance', 'drought_resistance'}	phospholipase D alpha 4 [Source:NCBI gene (formerly Entrezgene);Acc:841961]	1:20585008-20587723	Arabidopsis thaliana	known
AT1G55610	2	{'disease_resistance', 'grain_weight_increase'}	BRI1 like [Source:NCBI gene (formerly Entrezgene);Acc:842010]	1:20779493-20784017	Arabidopsis thaliana	known
AT1G56010	2	{'grain_weight_increase', 'salt_resistance'}	NAC domain containing protein 1 [Source:NCBI gene (formerly Entrezgene);Acc:842052]	1:20946571-20949281	Arabidopsis thaliana	known
AT1G56050	2	{'disease_resistance', 'salt_resistance'}	GTP-binding protein-like protein [Source:NCBI gene (formerly Entrezgene);Acc:842056]	1:20963686-20966341	Arabidopsis thaliana	known
AT1G56060	2	{'salt_resistance', 'drought_resistance'}	cysteine-rich/transmembrane domain protein B [Source:NCBI gene (formerly Entrezgene);Acc:842057]	1:20966528-20967180	Arabidopsis thaliana	known
AT1G56160	3	{'salt_resistance', 'insect_resistance', 'drought_resistance'}	myb domain protein 72 [Source:NCBI gene (formerly Entrezgene);Acc:842069]	1:21022384-21023587	Arabidopsis thaliana	known
AT1G58340	2	{'disease_resistance', 'drought_resistance'}	MATE efflux family protein [Source:NCBI gene (formerly Entrezgene);Acc:842203]	1:21652988-21655439	Arabidopsis thaliana	known
AT1G59580	3	{'disease_resistance', 'salt_resistance', 'drought_resistance'}	mitogen-activated 2 [Source:NCBI gene (formerly Entrezgene);Acc:842248]	1:21884018-21886051	Arabidopsis thaliana	known
AT1G59860	2	{'disease_resistance', 'salt_resistance'}	HSP20-like chaperones superfamily protein [Source:NCBI gene (formerly Entrezgene);Acc:842280]	1:22031343-22032250	Arabidopsis thaliana	known
AT1G59870	4	{'disease_resistance', 'salt_resistance', 'insect_resistance', 'drought_resistance'}	ABC-2 and Plant PDR ABC-type transporter family protein [Source:NCBI gene (formerly Entrezgene);Acc:842281]	1:22034423-22040126	Arabidopsis thaliana	known
AT1G60090	2	{'disease_resistance', 'salt_resistance'}	beta glucosidase 4 [Source:NCBI gene (formerly Entrezgene);Acc:842304]	1:22155559-22158272	Arabidopsis thaliana	known
AT1G60260	2	{'disease_resistance', 'salt_resistance'}		1:22218787-22221433	Arabidopsis thaliana	known
AT1G60800	2	{'disease_resistance', 'grain_weight_increase'}	NSP-interacting kinase 3 [Source:NCBI gene (formerly Entrezgene);Acc:842374]	1:22383393-22387766	Arabidopsis thaliana	known
AT1G60940	3	{'disease_resistance', 'salt_resistance', 'drought_resistance'}	SNF1-related protein kinase 2.10 [Source:NCBI gene (formerly Entrezgene);Acc:842385]	1:22439063-22442221	Arabidopsis thaliana	known
AT1G61110	5	{'grain_weight_increase', 'disease_resistance', 'drought_resistance', 'plant_height_reduce', 'salt_resistance'}	NAC domain containing protein 25 [Source:NCBI gene (formerly Entrezgene);Acc:842404]	1:22516602-22518292	Arabidopsis thaliana	known
AT1G61360	3	{'disease_resistance', 'salt_resistance', 'drought_resistance'}	S-locus lectin protein kinase family protein [Source:NCBI gene (formerly Entrezgene);Acc:842430]	1:22637688-22641999	Arabidopsis thaliana	known
AT1G61370	3	{'disease_resistance', 'salt_resistance', 'drought_resistance'}	S-locus lectin protein kinase family protein [Source:NCBI gene (formerly Entrezgene);Acc:842431]	1:22641843-22645922	Arabidopsis thaliana	known
AT1G61380	2	{'disease_resistance', 'salt_resistance'}	S-domain-1 29 [Source:NCBI gene (formerly Entrezgene);Acc:842432]	1:22645923-22650072	Arabidopsis thaliana	known
AT1G61390	2	{'disease_resistance', 'salt_resistance'}	S-locus lectin protein kinase family protein [Source:NCBI gene (formerly Entrezgene);Acc:842433]	1:22650111-22654395	Arabidopsis thaliana	known
AT1G61400	3	{'disease_resistance', 'salt_resistance', 'drought_resistance'}	S-locus lectin protein kinase family protein [Source:NCBI gene (formerly Entrezgene);Acc:842434]	1:22654507-22658469	Arabidopsis thaliana	known
AT1G61420	3	{'disease_resistance', 'salt_resistance', 'drought_resistance'}	S-locus lectin protein kinase family protein [Source:NCBI gene (formerly Entrezgene);Acc:842436]	1:22660460-22664502	Arabidopsis thaliana	known
AT1G61430	3	{'disease_resistance', 'salt_resistance', 'drought_resistance'}	S-locus lectin protein kinase family protein [Source:NCBI gene (formerly Entrezgene);Acc:842437]	1:22664501-22668651	Arabidopsis thaliana	known
AT1G61440	3	{'disease_resistance', 'salt_resistance', 'drought_resistance'}	S-locus lectin protein kinase family protein [Source:NCBI gene (formerly Entrezgene);Acc:842438]	1:22669134-22673111	Arabidopsis thaliana	known
AT1G61460	2	{'disease_resistance', 'salt_resistance'}	G-type lectin S-receptor-like Serine/Threonine-kinase [Source:NCBI gene (formerly Entrezgene);Acc:842440]	1:22674268-22677188	Arabidopsis thaliana	known
AT1G61480	2	{'disease_resistance', 'salt_resistance'}	S-locus lectin protein kinase family protein [Source:NCBI gene (formerly Entrezgene);Acc:842442]	1:22681256-22684626	Arabidopsis thaliana	known
AT1G61490	3	{'disease_resistance', 'salt_resistance', 'drought_resistance'}	S-locus lectin protein kinase family protein [Source:NCBI gene (formerly Entrezgene);Acc:842443]	1:22684894-22689611	Arabidopsis thaliana	known
AT1G61500	3	{'disease_resistance', 'salt_resistance', 'drought_resistance'}	S-locus lectin protein kinase family protein [Source:NCBI gene (formerly Entrezgene);Acc:842444]	1:22689623-22693799	Arabidopsis thaliana	known
AT1G61550	2	{'disease_resistance', 'salt_resistance'}	S-locus lectin protein kinase family protein [Source:NCBI gene (formerly Entrezgene);Acc:842449]	1:22704198-22707829	Arabidopsis thaliana	known
AT1G61610	3	{'disease_resistance', 'salt_resistance', 'drought_resistance'}	S-locus lectin protein kinase family protein [Source:NCBI gene (formerly Entrezgene);Acc:842457]	1:22733359-22736858	Arabidopsis thaliana	known
AT1G61810	2	{'disease_resistance', 'salt_resistance'}	beta-glucosidase 45 [Source:NCBI gene (formerly Entrezgene);Acc:842478]	1:22829921-22834728	Arabidopsis thaliana	known
AT1G61820	2	{'disease_resistance', 'salt_resistance'}	beta glucosidase 46 [Source:NCBI gene (formerly Entrezgene);Acc:842479]	1:22835078-22838635	Arabidopsis thaliana	known
AT1G61950	2	{'disease_resistance', 'salt_resistance'}	calcium-dependent protein kinase 19 [Source:NCBI gene (formerly Entrezgene);Acc:842490]	1:22899389-22902118	Arabidopsis thaliana	known
AT1G62300	3	{'disease_resistance', 'salt_resistance', 'drought_resistance'}	WRKY family transcription factor [Source:NCBI gene (formerly Entrezgene);Acc:842527]	1:23016569-23019494	Arabidopsis thaliana	known
AT1G62700	4	{'disease_resistance', 'grain_weight_increase', 'salt_resistance', 'drought_resistance'}	NAC (No apical meristem) domain transcriptional regulator superfamily protein [Source:NCBI gene (formerly Entrezgene);Acc:842568]	1:23215953-23219209	Arabidopsis thaliana	known
AT1G64190	3	{'disease_resistance', 'salt_resistance', 'drought_resistance'}	6-phosphogluconate dehydrogenase family protein [Source:NCBI gene (formerly Entrezgene);Acc:842724]	1:23825328-23827136	Arabidopsis thaliana	known
AT1G64280	2	{'disease_resistance', 'insect_resistance'}	regulatory protein (NPR1) [Source:NCBI gene (formerly Entrezgene);Acc:842733]	1:23852748-23855658	Arabidopsis thaliana	known
AT1G64480	3	{'disease_resistance', 'salt_resistance', 'drought_resistance'}	calcineurin B-like protein 8 [Source:NCBI gene (formerly Entrezgene);Acc:842756]	1:23947794-23950361	Arabidopsis thaliana	known
AT1G64710	2	{'disease_resistance', 'salt_resistance'}	GroES-like zinc-binding alcohol dehydrogenase family protein [Source:NCBI gene (formerly Entrezgene);Acc:842779]	1:24044686-24046621	Arabidopsis thaliana	known
AT1G65390	2	{'disease_resistance', 'insect_resistance'}	phloem protein 2 A5 [Source:NCBI gene (formerly Entrezgene);Acc:842851]	1:24292372-24294740	Arabidopsis thaliana	known
AT1G65790	2	{'disease_resistance', 'salt_resistance'}	receptor kinase 1 [Source:NCBI gene (formerly Entrezgene);Acc:842890]	1:24468770-24472475	Arabidopsis thaliana	known
AT1G65800	2	{'disease_resistance', 'salt_resistance'}	receptor kinase 2 [Source:NCBI gene (formerly Entrezgene);Acc:842891]	1:24472873-24476891	Arabidopsis thaliana	known
AT1G66200	2	{'grain_weight_increase', 'plant_height_reduce'}		1:24655115-24657703	Arabidopsis thaliana	known
AT1G66230	4	{'disease_resistance', 'salt_resistance', 'insect_resistance', 'drought_resistance'}	myb domain protein 20 [Source:NCBI gene (formerly Entrezgene);Acc:842938]	1:24677121-24678580	Arabidopsis thaliana	known
AT1G66270	3	{'disease_resistance', 'salt_resistance', 'insect_resistance'}	Glycosyl hydrolase superfamily protein [Source:NCBI gene (formerly Entrezgene);Acc:842944]	1:24699868-24703166	Arabidopsis thaliana	known
AT1G66280	3	{'disease_resistance', 'salt_resistance', 'insect_resistance'}	Glycosyl hydrolase superfamily protein [Source:NCBI gene (formerly Entrezgene);Acc:842945]	1:24706512-24709996	Arabidopsis thaliana	known
AT1G66350	3	{'grain_weight_increase', 'salt_resistance', 'plant_height_reduce'}	RGA-like 1 [Source:NCBI gene (formerly Entrezgene);Acc:842953]	1:24748105-24750186	Arabidopsis thaliana	known
AT1G66540	2	{'disease_resistance', 'insect_resistance'}	Cytochrome P450 superfamily protein [Source:NCBI gene (formerly Entrezgene);Acc:842972]	1:24824356-24826683	Arabidopsis thaliana	known
AT1G66750	3	{'disease_resistance', 'salt_resistance', 'drought_resistance'}	CDK-activating kinase 4 [Source:NCBI gene (formerly Entrezgene);Acc:842993]	1:24894523-24897259	Arabidopsis thaliana	known
AT1G66880	3	{'disease_resistance', 'salt_resistance', 'drought_resistance'}	Protein kinase superfamily protein [Source:NCBI gene (formerly Entrezgene);Acc:843006]	1:24946928-24955694	Arabidopsis thaliana	known
AT1G66950	4	{'disease_resistance', 'salt_resistance', 'insect_resistance', 'drought_resistance'}	pleiotropic drug resistance 11 [Source:NCBI gene (formerly Entrezgene);Acc:843013]	1:24978121-24984619	Arabidopsis thaliana	known
AT1G67280	2	{'disease_resistance', 'salt_resistance'}	Glyoxalase/Bleomycin resistance protein/Dioxygenase superfamily protein [Source:NCBI gene (formerly Entrezgene);Acc:843048]	1:25188238-25190694	Arabidopsis thaliana	known
AT1G67310	2	{'salt_resistance', 'insect_resistance'}	Calmodulin-binding transcription activator protein with CG-1 and Ankyrin domain [Source:NCBI gene (formerly Entrezgene);Acc:843051]	1:25198182-25203126	Arabidopsis thaliana	known
AT1G67520	3	{'disease_resistance', 'salt_resistance', 'drought_resistance'}	lectin protein kinase family protein [Source:NCBI gene (formerly Entrezgene);Acc:843073]	1:25302628-25306357	Arabidopsis thaliana	known
AT1G67560	2	{'disease_resistance', 'insect_resistance'}	PLAT/LH2 domain-containing lipoxygenase family protein [Source:NCBI gene (formerly Entrezgene);Acc:843077]	1:25319804-25324581	Arabidopsis thaliana	known
AT1G67890	2	{'disease_resistance', 'drought_resistance'}	PAS domain-containing protein tyrosine kinase family protein [Source:NCBI gene (formerly Entrezgene);Acc:843117]	1:25457033-25462847	Arabidopsis thaliana	known
AT1G68690	2	{'disease_resistance', 'salt_resistance'}	Protein kinase superfamily protein [Source:NCBI gene (formerly Entrezgene);Acc:3767664]	1:25788305-25792324	Arabidopsis thaliana	known
AT1G69120	2	{'disease_resistance', 'plant_height_reduce'}	K-box region and MADS-box transcription factor family protein [Source:NCBI gene (formerly Entrezgene);Acc:843244]	1:25982294-25986349	Arabidopsis thaliana	known
AT1G69490	4	{'disease_resistance', 'grain_weight_increase', 'salt_resistance', 'drought_resistance'}	NAC-like, activated by AP3/PI [Source:NCBI gene (formerly Entrezgene);Acc:843282]	1:26122080-26123514	Arabidopsis thaliana	known
AT1G69560	2	{'salt_resistance', 'drought_resistance'}	myb domain protein 105 [Source:NCBI gene (formerly Entrezgene);Acc:843292]	1:26157702-26159094	Arabidopsis thaliana	known
AT1G69730	2	{'disease_resistance', 'salt_resistance'}	Wall-associated kinase family protein [Source:NCBI gene (formerly Entrezgene);Acc:843309]	1:26228565-26231375	Arabidopsis thaliana	known
AT1G69790	2	{'disease_resistance', 'grain_weight_increase'}	Protein kinase superfamily protein [Source:NCBI gene (formerly Entrezgene);Acc:843315]	1:26266592-26269013	Arabidopsis thaliana	known
AT1G69910	2	{'disease_resistance', 'salt_resistance'}	Protein kinase superfamily protein [Source:NCBI gene (formerly Entrezgene);Acc:843327]	1:26329863-26332426	Arabidopsis thaliana	known
AT1G70130	3	{'disease_resistance', 'salt_resistance', 'plant_height_reduce'}	Concanavalin A-like lectin protein kinase family protein [Source:NCBI gene (formerly Entrezgene);Acc:843349]	1:26409601-26411828	Arabidopsis thaliana	known
AT1G70460	2	{'disease_resistance', 'grain_weight_increase'}	root hair specific 10 [Source:NCBI gene (formerly Entrezgene);Acc:843382]	1:26555705-26559322	Arabidopsis thaliana	known
AT1G71330	2	{'salt_resistance', 'drought_resistance'}	non-intrinsic ABC protein 5 [Source:NCBI gene (formerly Entrezgene);Acc:843474]	1:26884014-26885169	Arabidopsis thaliana	known
AT1G71450	2	{'salt_resistance', 'drought_resistance'}	Integrase-type DNA-binding superfamily protein [Source:NCBI gene (formerly Entrezgene);Acc:843486]	1:26927012-26928056	Arabidopsis thaliana	known
AT1G71830	2	{'disease_resistance', 'grain_weight_increase'}	somatic embryosis receptor-like kinase 1 [Source:NCBI gene (formerly Entrezgene);Acc:843513]	1:27018158-27022117	Arabidopsis thaliana	known
AT1G71870	2	{'disease_resistance', 'drought_resistance'}	MATE efflux family protein [Source:NCBI gene (formerly Entrezgene);Acc:843518]	1:27032221-27035182	Arabidopsis thaliana	known
AT1G71930	2	{'salt_resistance', 'drought_resistance'}	vascular related NAC-domain protein 7 [Source:NCBI gene (formerly Entrezgene);Acc:843524]	1:27074702-27077991	Arabidopsis thaliana	known
AT1G72360	3	{'disease_resistance', 'salt_resistance', 'drought_resistance'}	Integrase-type DNA-binding superfamily protein [Source:NCBI gene (formerly Entrezgene);Acc:843568]	1:27241696-27242968	Arabidopsis thaliana	known
AT1G72520	2	{'disease_resistance', 'insect_resistance'}	PLAT/LH2 domain-containing lipoxygenase family protein [Source:NCBI gene (formerly Entrezgene);Acc:843584]	1:27308513-27312756	Arabidopsis thaliana	known
AT1G72770	3	{'disease_resistance', 'salt_resistance', 'drought_resistance'}	HYPERSENSITIVE TO ABA1 [Source:NCBI gene (formerly Entrezgene);Acc:843609]	1:27389948-27393327	Arabidopsis thaliana	known
AT1G73000	2	{'salt_resistance', 'drought_resistance'}	PYR1-like 3 [Source:NCBI gene (formerly Entrezgene);Acc:843631]	1:27462983-27463968	Arabidopsis thaliana	known
AT1G73340	2	{'disease_resistance', 'grain_weight_increase'}	Cytochrome P450 superfamily protein [Source:NCBI gene (formerly Entrezgene);Acc:843669]	1:27573114-27575273	Arabidopsis thaliana	known
AT1G73410	2	{'salt_resistance', 'drought_resistance'}	myb domain protein 54 [Source:NCBI gene (formerly Entrezgene);Acc:843676]	1:27601593-27603317	Arabidopsis thaliana	known
AT1G73500	3	{'disease_resistance', 'salt_resistance', 'drought_resistance'}	MAP kinase kinase 9 [Source:NCBI gene (formerly Entrezgene);Acc:843685]	1:27639091-27640643	Arabidopsis thaliana	known
AT1G73660	2	{'disease_resistance', 'drought_resistance'}	protein tyrosine kinase family protein [Source:NCBI gene (formerly Entrezgene);Acc:843701]	1:27691893-27697372	Arabidopsis thaliana	known
AT1G73670	3	{'disease_resistance', 'salt_resistance', 'drought_resistance'}	MAP kinase 15 [Source:NCBI gene (formerly Entrezgene);Acc:843702]	1:27699871-27703449	Arabidopsis thaliana	known
AT1G73690	3	{'disease_resistance', 'salt_resistance', 'drought_resistance'}	cyclin-dependent kinase D1;1 [Source:NCBI gene (formerly Entrezgene);Acc:843704]	1:27714910-27717420	Arabidopsis thaliana	known
AT1G73730	2	{'disease_resistance', 'salt_resistance'}	ETHYLENE-INSENSITIVE3-like 3 [Source:NCBI gene (formerly Entrezgene);Acc:843708]	1:27730031-27732683	Arabidopsis thaliana	known
AT1G73805	2	{'disease_resistance', 'drought_resistance'}	Calmodulin binding protein-like protein [Source:NCBI gene (formerly Entrezgene);Acc:843716]	1:27744790-27749248	Arabidopsis thaliana	known
AT1G74080	3	{'salt_resistance', 'insect_resistance', 'drought_resistance'}	myb domain protein 122 [Source:NCBI gene (formerly Entrezgene);Acc:843748]	1:27855578-27857598	Arabidopsis thaliana	known
AT1G74650	2	{'salt_resistance', 'insect_resistance'}	myb domain protein 31 [Source:NCBI gene (formerly Entrezgene);Acc:843804]	1:28041146-28043022	Arabidopsis thaliana	known
AT1G74740	2	{'disease_resistance', 'salt_resistance'}	calcium-dependent protein kinase 30 [Source:NCBI gene (formerly Entrezgene);Acc:843813]	1:28079946-28082671	Arabidopsis thaliana	known
AT1G75490	2	{'salt_resistance', 'drought_resistance'}	Integrase-type DNA-binding superfamily protein [Source:NCBI gene (formerly Entrezgene);Acc:843885]	1:28335502-28336990	Arabidopsis thaliana	known
AT1G75940	3	{'disease_resistance', 'salt_resistance', 'insect_resistance'}	Glycosyl hydrolase superfamily protein [Source:NCBI gene (formerly Entrezgene);Acc:843927]	1:28511142-28514284	Arabidopsis thaliana	known
AT1G76040	2	{'disease_resistance', 'salt_resistance'}	calcium-dependent protein kinase 29 [Source:NCBI gene (formerly Entrezgene);Acc:843936]	1:28537593-28540707	Arabidopsis thaliana	known
AT1G76420	5	{'grain_weight_increase', 'disease_resistance', 'drought_resistance', 'plant_height_reduce', 'salt_resistance'}	NAC (No Apical Meristem) domain transcriptional regulator superfamily protein [Source:NCBI gene (formerly Entrezgene);Acc:843975]	1:28671806-28674045	Arabidopsis thaliana	known
AT1G76640	2	{'salt_resistance', 'drought_resistance'}	Calcium-binding EF-hand family protein [Source:NCBI gene (formerly Entrezgene);Acc:843997]	1:28765254-28765866	Arabidopsis thaliana	known
AT1G76650	2	{'salt_resistance', 'drought_resistance'}	calmodulin-like 38 [Source:NCBI gene (formerly Entrezgene);Acc:843998]	1:28766750-28768138	Arabidopsis thaliana	known
AT1G76680	2	{'salt_resistance', 'drought_resistance'}	12-oxophytodienoate reductase 1 [Source:NCBI gene (formerly Entrezgene);Acc:844001]	1:28776626-28778837	Arabidopsis thaliana	known
AT1G76690	2	{'salt_resistance', 'drought_resistance'}	12-oxophytodienoate reductase 2 [Source:NCBI gene (formerly Entrezgene);Acc:844002]	1:28778622-28780483	Arabidopsis thaliana	known
AT1G77120	2	{'disease_resistance', 'salt_resistance'}	alcohol dehydrogenase 1 [Source:NCBI gene (formerly Entrezgene);Acc:844047]	1:28975255-28977417	Arabidopsis thaliana	known
AT1G77180	2	{'salt_resistance', 'drought_resistance'}	chromatin protein family [Source:NCBI gene (formerly Entrezgene);Acc:844055]	1:28999577-29002143	Arabidopsis thaliana	known
AT1G77450	5	{'grain_weight_increase', 'disease_resistance', 'drought_resistance', 'plant_height_reduce', 'salt_resistance'}	NAC domain containing protein 32 [Source:NCBI gene (formerly Entrezgene);Acc:844081]	1:29099839-29101759	Arabidopsis thaliana	known
AT1G78080	2	{'salt_resistance', 'drought_resistance'}	related to AP2 4 [Source:NCBI gene (formerly Entrezgene);Acc:844143]	1:29364072-29366207	Arabidopsis thaliana	known
AT1G78290	3	{'disease_resistance', 'salt_resistance', 'drought_resistance'}	Protein kinase superfamily protein [Source:NCBI gene (formerly Entrezgene);Acc:844164]	1:29457205-29459493	Arabidopsis thaliana	known
AT1G78390	3	{'disease_resistance', 'salt_resistance', 'drought_resistance'}	nine-cis-epoxycarotenoid dioxygenase 9 [Source:NCBI gene (formerly Entrezgene);Acc:844175]	1:29490705-29492875	Arabidopsis thaliana	known
AT1G79180	3	{'salt_resistance', 'insect_resistance', 'drought_resistance'}	myb domain protein 63 [Source:NCBI gene (formerly Entrezgene);Acc:844259]	1:29786257-29787820	Arabidopsis thaliana	known
AT1G79580	2	{'salt_resistance', 'drought_resistance'}	NAC (No Apical Meristem) domain transcriptional regulator superfamily protein [Source:NCBI gene (formerly Entrezgene);Acc:844296]	1:29940803-29943713	Arabidopsis thaliana	known
AT1G79620	2	{'disease_resistance', 'salt_resistance'}	Leucine-rich repeat protein kinase family protein [Source:NCBI gene (formerly Entrezgene);Acc:844301]	1:29957390-29962323	Arabidopsis thaliana	known
AT1G79680	2	{'disease_resistance', 'salt_resistance'}	WALL ASSOCIATED KINASE (WAK)-LIKE 10 [Source:NCBI gene (formerly Entrezgene);Acc:844307]	1:29979973-29982819	Arabidopsis thaliana	known
AT1G80460	2	{'salt_resistance', 'drought_resistance'}	Actin-like ATPase superfamily protein [Source:NCBI gene (formerly Entrezgene);Acc:844385]	1:30246683-30249337	Arabidopsis thaliana	known
AT1G80840	3	{'disease_resistance', 'salt_resistance', 'drought_resistance'}	WRKY DNA-binding protein 40 [Source:NCBI gene (formerly Entrezgene);Acc:844423]	1:30383561-30385499	Arabidopsis thaliana	known
AT2G01450	3	{'disease_resistance', 'salt_resistance', 'drought_resistance'}	MAP kinase 17 [Source:NCBI gene (formerly Entrezgene);Acc:814673]	2:199491-203126	Arabidopsis thaliana	known
AT2G01570	3	{'grain_weight_increase', 'salt_resistance', 'plant_height_reduce'}	GRAS family transcription factor family protein [Source:NCBI gene (formerly Entrezgene);Acc:814686]	2:255247-257568	Arabidopsis thaliana	known
AT2G01830	3	{'disease_resistance', 'salt_resistance', 'drought_resistance'}	CHASE domain containing histidine kinase protein [Source:NCBI gene (formerly Entrezgene);Acc:814714]	2:362983-369707	Arabidopsis thaliana	known
AT2G01950	2	{'grain_weight_increase', 'plant_height_reduce'}	BRI1-like 2 [Source:NCBI gene (formerly Entrezgene);Acc:814726]	2:440624-444324	Arabidopsis thaliana	known
AT2G02220	2	{'disease_resistance', 'grain_weight_increase'}	phytosulfokin receptor 1 [Source:NCBI gene (formerly Entrezgene);Acc:814753]	2:583797-587401	Arabidopsis thaliana	known
AT2G02450	3	{'disease_resistance', 'salt_resistance', 'drought_resistance'}	NAC domain containing protein 35 [Source:NCBI gene (formerly Entrezgene);Acc:814775]	2:647538-650820	Arabidopsis thaliana	known
AT2G03440	2	{'disease_resistance', 'salt_resistance'}	nodulin-related protein 1 [Source:NCBI gene (formerly Entrezgene);Acc:814873]	2:1039088-1040184	Arabidopsis thaliana	known
AT2G03710	2	{'disease_resistance', 'plant_height_reduce'}	K-box region and MADS-box transcription factor family protein [Source:NCBI gene (formerly Entrezgene);Acc:814898]	2:1129229-1131838	Arabidopsis thaliana	known
AT2G04030	2	{'disease_resistance', 'salt_resistance'}	Chaperone protein htpG family protein [Source:NCBI gene (formerly Entrezgene);Acc:814930]	2:1281754-1286144	Arabidopsis thaliana	known
AT2G04300	2	{'disease_resistance', 'grain_weight_increase'}	Leucine-rich repeat protein kinase family protein [Source:NCBI gene (formerly Entrezgene);Acc:814968]	2:1493009-1497016	Arabidopsis thaliana	known
AT2G04880	3	{'disease_resistance', 'salt_resistance', 'drought_resistance'}	zinc-dependent activator protein-1 [Source:NCBI gene (formerly Entrezgene);Acc:815035]	2:1717833-1720526	Arabidopsis thaliana	known
AT2G06050	2	{'salt_resistance', 'drought_resistance'}	oxophytodienoate-reductase 3 [Source:NCBI gene (formerly Entrezgene);Acc:815160]	2:2359114-2362375	Arabidopsis thaliana	known
AT2G06200	3	{'disease_resistance', 'grain_weight_increase', 'plant_height_reduce'}	growth-regulating factor 6 [Source:NCBI gene (formerly Entrezgene);Acc:815176]	2:2426176-2427355	Arabidopsis thaliana	known
AT2G11520	2	{'disease_resistance', 'salt_resistance'}	calmodulin-binding receptor-like cytoplasmic kinase 3 [Source:NCBI gene (formerly Entrezgene);Acc:815625]	2:4618545-4621722	Arabidopsis thaliana	known
AT2G13790	2	{'disease_resistance', 'grain_weight_increase'}	somatic embryosis receptor-like kinase 4 [Source:NCBI gene (formerly Entrezgene);Acc:815862]	2:5741592-5746833	Arabidopsis thaliana	known
AT2G13800	2	{'disease_resistance', 'grain_weight_increase'}	somatic embryosis receptor-like kinase 5 [Source:NCBI gene (formerly Entrezgene);Acc:815863]	2:5753103-5757353	Arabidopsis thaliana	known
AT2G14440	2	{'disease_resistance', 'grain_weight_increase'}	Leucine-rich repeat protein kinase family protein [Source:NCBI gene (formerly Entrezgene);Acc:815932]	2:6143073-6147419	Arabidopsis thaliana	known
AT2G16700	2	{'disease_resistance', 'insect_resistance'}	actin depolymerizing factor 5 [Source:NCBI gene (formerly Entrezgene);Acc:816171]	2:7244500-7246069	Arabidopsis thaliana	known
AT2G16720	3	{'salt_resistance', 'insect_resistance', 'drought_resistance'}	myb domain protein 7 [Source:NCBI gene (formerly Entrezgene);Acc:816173]	2:7255473-7256831	Arabidopsis thaliana	known
AT2G17290	2	{'disease_resistance', 'salt_resistance'}	Calcium-dependent protein kinase family protein [Source:NCBI gene (formerly Entrezgene);Acc:816235]	2:7516330-7519662	Arabidopsis thaliana	known
AT2G17560	2	{'salt_resistance', 'drought_resistance'}	high mobility group B4 [Source:NCBI gene (formerly Entrezgene);Acc:816263]	2:7642117-7643739	Arabidopsis thaliana	known
AT2G17700	2	{'disease_resistance', 'drought_resistance'}	ACT-like protein tyrosine kinase family protein [Source:NCBI gene (formerly Entrezgene);Acc:816278]	2:7685354-7689445	Arabidopsis thaliana	known
AT2G17890	2	{'disease_resistance', 'salt_resistance'}	calcium-dependent protein kinase 16 [Source:NCBI gene (formerly Entrezgene);Acc:816299]	2:7769521-7772782	Arabidopsis thaliana	known
AT2G18060	3	{'disease_resistance', 'salt_resistance', 'drought_resistance'}	vascular related NAC-domain protein 1 [Source:NCBI gene (formerly Entrezgene);Acc:816318]	2:7847967-7851606	Arabidopsis thaliana	known
AT2G18170	3	{'disease_resistance', 'salt_resistance', 'drought_resistance'}	MAP kinase 7 [Source:NCBI gene (formerly Entrezgene);Acc:816330]	2:7907774-7910040	Arabidopsis thaliana	known
AT2G18750	2	{'disease_resistance', 'drought_resistance'}	Calmodulin-binding protein [Source:NCBI gene (formerly Entrezgene);Acc:816390]	2:8125128-8128702	Arabidopsis thaliana	known
AT2G19480	2	{'disease_resistance', 'salt_resistance'}	nucleosome assembly protein 1;2 [Source:NCBI gene (formerly Entrezgene);Acc:816467]	2:8438393-8441501	Arabidopsis thaliana	known
AT2G20880	3	{'disease_resistance', 'salt_resistance', 'drought_resistance'}	Integrase-type DNA-binding superfamily protein [Source:NCBI gene (formerly Entrezgene);Acc:816622]	2:8985959-8987302	Arabidopsis thaliana	known
AT2G21430	2	{'salt_resistance', 'drought_resistance'}	Papain family cysteine protease [Source:NCBI gene (formerly Entrezgene);Acc:816682]	2:9171872-9173490	Arabidopsis thaliana	known
AT2G21440	2	{'salt_resistance', 'drought_resistance'}	RNA-binding (RRM/RBD/RNP motifs) family protein [Source:NCBI gene (formerly Entrezgene);Acc:816683]	2:9173384-9179166	Arabidopsis thaliana	known
AT2G21770	3	{'disease_resistance', 'salt_resistance', 'drought_resistance'}	cellulose synthase A9 [Source:NCBI gene (formerly Entrezgene);Acc:816713]	2:9284391-9289744	Arabidopsis thaliana	known
AT2G22200	3	{'disease_resistance', 'salt_resistance', 'drought_resistance'}	Integrase-type DNA-binding superfamily protein [Source:NCBI gene (formerly Entrezgene);Acc:816754]	2:9443073-9444428	Arabidopsis thaliana	known
AT2G22300	2	{'salt_resistance', 'insect_resistance'}	signal responsive 1 [Source:NCBI gene (formerly Entrezgene);Acc:816762]	2:9471219-9476646	Arabidopsis thaliana	known
AT2G22630	2	{'disease_resistance', 'plant_height_reduce'}	AGAMOUS-like 17 [Source:NCBI gene (formerly Entrezgene);Acc:816794]	2:9618207-9622163	Arabidopsis thaliana	known
AT2G22840	3	{'disease_resistance', 'grain_weight_increase', 'plant_height_reduce'}	growth-regulating factor 1 [Source:NCBI gene (formerly Entrezgene);Acc:816815]	2:9728480-9731301	Arabidopsis thaliana	known
AT2G23030	3	{'disease_resistance', 'salt_resistance', 'drought_resistance'}	SNF1-related protein kinase 2.9 [Source:NCBI gene (formerly Entrezgene);Acc:816833]	2:9803492-9806731	Arabidopsis thaliana	known
AT2G23290	2	{'salt_resistance', 'drought_resistance'}	myb domain protein 70 [Source:NCBI gene (formerly Entrezgene);Acc:816861]	2:9904506-9906032	Arabidopsis thaliana	known
AT2G23450	2	{'disease_resistance', 'drought_resistance'}	Protein kinase superfamily protein [Source:NCBI gene (formerly Entrezgene);Acc:816877]	2:9988678-9992010	Arabidopsis thaliana	known
AT2G23950	2	{'disease_resistance', 'grain_weight_increase'}	Leucine-rich repeat protein kinase family protein [Source:NCBI gene (formerly Entrezgene);Acc:816928]	2:10186891-10190492	Arabidopsis thaliana	known
AT2G23980	2	{'disease_resistance', 'salt_resistance'}	cyclic nucleotide-gated channel 6 [Source:NCBI gene (formerly Entrezgene);Acc:816931]	2:10201104-10205422	Arabidopsis thaliana	known
AT2G24300	2	{'disease_resistance', 'drought_resistance'}	Calmodulin-binding protein [Source:NCBI gene (formerly Entrezgene);Acc:816966]	2:10340785-10343736	Arabidopsis thaliana	known
AT2G24610	2	{'disease_resistance', 'salt_resistance'}	cyclic nucleotide-gated channel 14 [Source:NCBI gene (formerly Entrezgene);Acc:816997]	2:10456879-10460571	Arabidopsis thaliana	known
AT2G25000	3	{'disease_resistance', 'salt_resistance', 'drought_resistance'}	WRKY DNA-binding protein 60 [Source:NCBI gene (formerly Entrezgene);Acc:817039]	2:10629662-10631413	Arabidopsis thaliana	known
AT2G25090	3	{'disease_resistance', 'salt_resistance', 'drought_resistance'}	CBL-interacting protein kinase 16 [Source:NCBI gene (formerly Entrezgene);Acc:817047]	2:10670410-10672892	Arabidopsis thaliana	known
AT2G25140	2	{'salt_resistance', 'drought_resistance'}	casein lytic proteinase B4 [Source:NCBI gene (formerly Entrezgene);Acc:817052]	2:10697629-10702203	Arabidopsis thaliana	known
AT2G25160	2	{'disease_resistance', 'insect_resistance'}	cytochrome P450, family 82, subfamily F, polypeptide 1 [Source:NCBI gene (formerly Entrezgene);Acc:817054]	2:10708993-10711281	Arabidopsis thaliana	known
AT2G25540	3	{'disease_resistance', 'salt_resistance', 'drought_resistance'}	cellulose synthase A catalytic subunit 3 UDP-forming-like protein [Source:NCBI gene (formerly Entrezgene);Acc:817092]	2:10866822-10872243	Arabidopsis thaliana	known
AT2G25600	2	{'salt_resistance', 'insect_resistance'}	Shaker pollen inward K+ channel [Source:NCBI gene (formerly Entrezgene);Acc:817099]	2:10894253-10898672	Arabidopsis thaliana	known
AT2G25630	2	{'disease_resistance', 'salt_resistance'}	beta glucosidase 14 [Source:NCBI gene (formerly Entrezgene);Acc:817104]	2:10908360-10909880	Arabidopsis thaliana	known
AT2G25820	2	{'salt_resistance', 'drought_resistance'}	Integrase-type DNA-binding superfamily protein [Source:NCBI gene (formerly Entrezgene);Acc:817124]	2:11014789-11015838	Arabidopsis thaliana	known
AT2G26040	2	{'salt_resistance', 'drought_resistance'}	PYR1-like 2 [Source:NCBI gene (formerly Entrezgene);Acc:817145]	2:11094258-11095542	Arabidopsis thaliana	known
AT2G26330	2	{'disease_resistance', 'plant_height_reduce'}	Leucine-rich receptor-like protein kinase family protein [Source:NCBI gene (formerly Entrezgene);Acc:817173]	2:11208080-11214662	Arabidopsis thaliana	known
AT2G26650	2	{'salt_resistance', 'insect_resistance'}	K+ transporter 1 [Source:NCBI gene (formerly Entrezgene);Acc:817206]	2:11331850-11336738	Arabidopsis thaliana	known
AT2G26980	3	{'disease_resistance', 'salt_resistance', 'drought_resistance'}	CBL-interacting protein kinase 3 [Source:NCBI gene (formerly Entrezgene);Acc:817240]	2:11514600-11518734	Arabidopsis thaliana	known
AT2G27050	2	{'disease_resistance', 'salt_resistance'}	ETHYLENE-INSENSITIVE3-like 1 [Source:NCBI gene (formerly Entrezgene);Acc:817247]	2:11545656-11548293	Arabidopsis thaliana	known
AT2G27300	2	{'salt_resistance', 'drought_resistance'}	NTM1-like 8 [Source:NCBI gene (formerly Entrezgene);Acc:817273]	2:11680276-11681971	Arabidopsis thaliana	known
AT2G27420	3	{'disease_resistance', 'salt_resistance', 'drought_resistance'}	Cysteine proteinases superfamily protein [Source:NCBI gene (formerly Entrezgene);Acc:817287]	2:11726134-11727654	Arabidopsis thaliana	known
AT2G28260	2	{'disease_resistance', 'salt_resistance'}	cyclic nucleotide-gated channel 15 [Source:NCBI gene (formerly Entrezgene);Acc:817372]	2:12049443-12052643	Arabidopsis thaliana	known
AT2G28960	2	{'disease_resistance', 'drought_resistance'}	Leucine-rich repeat protein kinase family protein [Source:NCBI gene (formerly Entrezgene);Acc:817445]	2:12437718-12442592	Arabidopsis thaliana	known
AT2G28990	2	{'disease_resistance', 'drought_resistance'}	Leucine-rich repeat protein kinase family protein [Source:NCBI gene (formerly Entrezgene);Acc:817448]	2:12454637-12459726	Arabidopsis thaliana	known
AT2G29090	2	{'salt_resistance', 'drought_resistance'}	cytochrome P450, family 707, subfamily A, polypeptide 2 [Source:NCBI gene (formerly Entrezgene);Acc:817457]	2:12494826-12499723	Arabidopsis thaliana	known
AT2G29220	2	{'salt_resistance', 'plant_height_reduce'}	Concanavalin A-like lectin protein kinase family protein [Source:NCBI gene (formerly Entrezgene);Acc:817471]	2:12562629-12564691	Arabidopsis thaliana	known
AT2G29380	3	{'disease_resistance', 'salt_resistance', 'drought_resistance'}	highly ABA-induced PP2C protein 3 [Source:NCBI gene (formerly Entrezgene);Acc:817487]	2:12608675-12610350	Arabidopsis thaliana	known
AT2G29390	2	{'disease_resistance', 'drought_resistance'}	sterol 4-alpha-methyl-oxidase 2-2 [Source:NCBI gene (formerly Entrezgene);Acc:817488]	2:12610508-12612937	Arabidopsis thaliana	known
AT2G29500	2	{'disease_resistance', 'salt_resistance'}	HSP20-like chaperones superfamily protein [Source:NCBI gene (formerly Entrezgene);Acc:817499]	2:12633065-12634120	Arabidopsis thaliana	known
AT2G29940	4	{'disease_resistance', 'salt_resistance', 'insect_resistance', 'drought_resistance'}	pleiotropic drug resistance 3 [Source:NCBI gene (formerly Entrezgene);Acc:817544]	2:12759973-12766794	Arabidopsis thaliana	known
AT2G30360	3	{'disease_resistance', 'salt_resistance', 'drought_resistance'}	SOS3-interacting protein 4 [Source:NCBI gene (formerly Entrezgene);Acc:817586]	2:12936968-12938834	Arabidopsis thaliana	known
AT2G30980	3	{'disease_resistance', 'salt_resistance', 'drought_resistance'}	SHAGGY-related protein kinase dZeta [Source:NCBI gene (formerly Entrezgene);Acc:817649]	2:13182025-13185973	Arabidopsis thaliana	known
AT2G31010	2	{'disease_resistance', 'drought_resistance'}	Protein kinase superfamily protein [Source:NCBI gene (formerly Entrezgene);Acc:817652]	2:13193954-13200138	Arabidopsis thaliana	known
AT2G31180	3	{'salt_resistance', 'insect_resistance', 'drought_resistance'}	myb domain protein 14 [Source:NCBI gene (formerly Entrezgene);Acc:817674]	2:13286681-13288380	Arabidopsis thaliana	known
AT2G31200	2	{'disease_resistance', 'insect_resistance'}	actin depolymerizing factor 6 [Source:NCBI gene (formerly Entrezgene);Acc:817676]	2:13293953-13295410	Arabidopsis thaliana	known
AT2G31230	2	{'disease_resistance', 'drought_resistance'}	ethylene-responsive element binding factor 15 [Source:NCBI gene (formerly Entrezgene);Acc:817680]	2:13306431-13307572	Arabidopsis thaliana	known
AT2G31500	2	{'disease_resistance', 'salt_resistance'}	calcium-dependent protein kinase 24 [Source:NCBI gene (formerly Entrezgene);Acc:817708]	2:13413738-13416602	Arabidopsis thaliana	known
AT2G32190	2	{'salt_resistance', 'drought_resistance'}	cysteine-rich/transmembrane domain A-like protein [Source:NCBI gene (formerly Entrezgene);Acc:817778]	2:13674255-13675356	Arabidopsis thaliana	known
AT2G32200	2	{'salt_resistance', 'drought_resistance'}	cysteine-rich/transmembrane domain A-like protein [Source:NCBI gene (formerly Entrezgene);Acc:817779]	2:13676389-13677306	Arabidopsis thaliana	known
AT2G32210	2	{'salt_resistance', 'drought_resistance'}	cysteine-rich/transmembrane domain A-like protein [Source:NCBI gene (formerly Entrezgene);Acc:817780]	2:13677986-13678906	Arabidopsis thaliana	known
AT2G32440	2	{'salt_resistance', 'drought_resistance'}	ent-kaurenoic acid hydroxylase 2 [Source:NCBI gene (formerly Entrezgene);Acc:817805]	2:13774588-13778026	Arabidopsis thaliana	known
AT2G32860	2	{'disease_resistance', 'salt_resistance'}	beta glucosidase 33 [Source:NCBI gene (formerly Entrezgene);Acc:817847]	2:13940187-13943883	Arabidopsis thaliana	known
AT2G33100	3	{'disease_resistance', 'salt_resistance', 'drought_resistance'}	cellulose synthase-like D1 [Source:NCBI gene (formerly Entrezgene);Acc:817872]	2:14036319-14040544	Arabidopsis thaliana	known
AT2G33170	3	{'disease_resistance', 'plant_height_reduce', 'insect_resistance'}	Leucine-rich repeat receptor-like protein kinase family protein [Source:NCBI gene (formerly Entrezgene);Acc:817878]	2:14056100-14060848	Arabidopsis thaliana	known
AT2G33480	4	{'disease_resistance', 'salt_resistance', 'plant_height_reduce', 'drought_resistance'}	NAC domain containing protein 41 [Source:NCBI gene (formerly Entrezgene);Acc:817913]	2:14180978-14182439	Arabidopsis thaliana	known
AT2G33520	2	{'salt_resistance', 'drought_resistance'}	cysteine-rich/transmembrane domain protein A [Source:NCBI gene (formerly Entrezgene);Acc:817917]	2:14196732-14197706	Arabidopsis thaliana	known
AT2G33710	3	{'disease_resistance', 'salt_resistance', 'drought_resistance'}	Integrase-type DNA-binding superfamily protein [Source:NCBI gene (formerly Entrezgene);Acc:817936]	2:14258509-14260904	Arabidopsis thaliana	known
AT2G34080	3	{'disease_resistance', 'salt_resistance', 'drought_resistance'}	Cysteine proteinases superfamily protein [Source:NCBI gene (formerly Entrezgene);Acc:817969]	2:14393181-14394858	Arabidopsis thaliana	known
AT2G34180	3	{'disease_resistance', 'salt_resistance', 'drought_resistance'}	CBL-interacting protein kinase 13 [Source:NCBI gene (formerly Entrezgene);Acc:817979]	2:14430761-14432482	Arabidopsis thaliana	known
AT2G34660	2	{'salt_resistance', 'drought_resistance'}	multidrug resistance-associated protein 2 [Source:NCBI gene (formerly Entrezgene);Acc:818031]	2:14602470-14612565	Arabidopsis thaliana	known
AT2G34710	2	{'disease_resistance', 'drought_resistance'}	Homeobox-leucine zipper family protein / lipid-binding START domain-containing protein [Source:NCBI gene (formerly Entrezgene);Acc:818036]	2:14639323-14644355	Arabidopsis thaliana	known
AT2G34740	3	{'disease_resistance', 'salt_resistance', 'drought_resistance'}	protein phosphatase 2C family protein [Source:NCBI gene (formerly Entrezgene);Acc:818039]	2:14658410-14660305	Arabidopsis thaliana	known
AT2G35620	2	{'disease_resistance', 'grain_weight_increase'}	Leucine-rich repeat protein kinase family protein [Source:NCBI gene (formerly Entrezgene);Acc:818130]	2:14960851-14965497	Arabidopsis thaliana	known
AT2G35700	2	{'salt_resistance', 'drought_resistance'}	ERF family protein 38 [Source:NCBI gene (formerly Entrezgene);Acc:818139]	2:15005064-15006034	Arabidopsis thaliana	known
AT2G35890	2	{'disease_resistance', 'salt_resistance'}	calcium-dependent protein kinase 25 [Source:NCBI gene (formerly Entrezgene);Acc:818162]	2:15066614-15069359	Arabidopsis thaliana	known
AT2G36270	2	{'salt_resistance', 'drought_resistance'}	Basic-leucine zipper (bZIP) transcription factor family protein [Source:NCBI gene (formerly Entrezgene);Acc:818199]	2:15204659-15207636	Arabidopsis thaliana	known
AT2G36400	3	{'disease_resistance', 'grain_weight_increase', 'plant_height_reduce'}	growth-regulating factor 3 [Source:NCBI gene (formerly Entrezgene);Acc:818213]	2:15270088-15273115	Arabidopsis thaliana	known
AT2G37280	4	{'disease_resistance', 'salt_resistance', 'insect_resistance', 'drought_resistance'}	pleiotropic drug resistance 5 [Source:NCBI gene (formerly Entrezgene);Acc:818305]	2:15650169-15656657	Arabidopsis thaliana	known
AT2G37700	2	{'salt_resistance', 'drought_resistance'}	Fatty acid hydroxylase superfamily [Source:NCBI gene (formerly Entrezgene);Acc:818347]	2:15810520-15814218	Arabidopsis thaliana	known
AT2G37710	3	{'disease_resistance', 'salt_resistance', 'plant_height_reduce'}	receptor lectin kinase [Source:NCBI gene (formerly Entrezgene);Acc:818348]	2:15814531-15817088	Arabidopsis thaliana	known
AT2G38210	2	{'salt_resistance', 'drought_resistance'}	putative PDX1-like protein 4 [Source:NCBI gene (formerly Entrezgene);Acc:818400]	2:16006749-16007722	Arabidopsis thaliana	known
AT2G38230	2	{'salt_resistance', 'drought_resistance'}	pyridoxine biosynthesis 1.1 [Source:NCBI gene (formerly Entrezgene);Acc:818402]	2:16011233-16012515	Arabidopsis thaliana	known
AT2G38240	2	{'salt_resistance', 'insect_resistance'}	2-oxoglutarate (2OG) and Fe(II)-dependent oxygenase superfamily protein [Source:NCBI gene (formerly Entrezgene);Acc:818403]	2:16012535-16014991	Arabidopsis thaliana	known
AT2G38310	2	{'salt_resistance', 'drought_resistance'}	PYR1-like 4 [Source:NCBI gene (formerly Entrezgene);Acc:818411]	2:16049918-16051356	Arabidopsis thaliana	known
AT2G38490	2	{'salt_resistance', 'drought_resistance'}	CBL-interacting Serine/Threonine-kinase [Source:NCBI gene (formerly Entrezgene);Acc:818431]	2:16113909-16115204	Arabidopsis thaliana	known
AT2G38510	2	{'disease_resistance', 'drought_resistance'}	MATE efflux family protein [Source:NCBI gene (formerly Entrezgene);Acc:818433]	2:16123985-16125535	Arabidopsis thaliana	known
AT2G38620	3	{'disease_resistance', 'salt_resistance', 'drought_resistance'}	cyclin-dependent kinase B1;2 [Source:NCBI gene (formerly Entrezgene);Acc:818444]	2:16152473-16154086	Arabidopsis thaliana	known
AT2G38910	2	{'disease_resistance', 'salt_resistance'}	calcium-dependent protein kinase 20 [Source:NCBI gene (formerly Entrezgene);Acc:818476]	2:16244906-16247855	Arabidopsis thaliana	known
AT2G39050	2	{'disease_resistance', 'salt_resistance'}	hydroxyproline-rich glycoprotein family protein [Source:NCBI gene (formerly Entrezgene);Acc:818491]	2:16303295-16305633	Arabidopsis thaliana	known
AT2G39770	2	{'disease_resistance', 'salt_resistance'}	Glucose-1-phosphate adenylyltransferase family protein [Source:NCBI gene (formerly Entrezgene);Acc:818562]	2:16588556-16591032	Arabidopsis thaliana	known
AT2G39880	2	{'salt_resistance', 'drought_resistance'}	myb domain protein 25 [Source:NCBI gene (formerly Entrezgene);Acc:818575]	2:16647711-16649527	Arabidopsis thaliana	known
AT2G40220	2	{'salt_resistance', 'drought_resistance'}	Integrase-type DNA-binding superfamily protein [Source:NCBI gene (formerly Entrezgene);Acc:818614]	2:16796247-16797585	Arabidopsis thaliana	known
AT2G40330	2	{'salt_resistance', 'drought_resistance'}	PYR1-like 6 [Source:NCBI gene (formerly Entrezgene);Acc:818626]	2:16844588-16846194	Arabidopsis thaliana	known
AT2G40340	2	{'salt_resistance', 'drought_resistance'}	Integrase-type DNA-binding superfamily protein [Source:NCBI gene (formerly Entrezgene);Acc:818627]	2:16848160-16850494	Arabidopsis thaliana	known
AT2G40750	3	{'disease_resistance', 'insect_resistance', 'drought_resistance'}	WRKY DNA-binding protein 54 [Source:NCBI gene (formerly Entrezgene);Acc:818670]	2:17000419-17002528	Arabidopsis thaliana	known
AT2G40810	2	{'salt_resistance', 'drought_resistance'}	autophagy-like protein [Source:NCBI gene (formerly Entrezgene);Acc:818678]	2:17032412-17034600	Arabidopsis thaliana	known
AT2G41070	2	{'salt_resistance', 'drought_resistance'}	Basic-leucine zipper (bZIP) transcription factor family protein [Source:NCBI gene (formerly Entrezgene);Acc:818706]	2:17129753-17132386	Arabidopsis thaliana	known
AT2G41430	2	{'salt_resistance', 'drought_resistance'}				known
AT2G41860	2	{'disease_resistance', 'salt_resistance'}	calcium-dependent protein kinase 14 [Source:NCBI gene (formerly Entrezgene);Acc:818786]	2:17467282-17470157	Arabidopsis thaliana	known
AT2G41870	2	{'salt_resistance', 'drought_resistance'}	Remorin family protein [Source:NCBI gene (formerly Entrezgene);Acc:818787]	2:17470865-17472984	Arabidopsis thaliana	known
AT2G42010	2	{'salt_resistance', 'drought_resistance'}	phospholipase D beta 1 [Source:NCBI gene (formerly Entrezgene);Acc:818802]	2:17532813-17538628	Arabidopsis thaliana	known
AT2G42530	2	{'salt_resistance', 'drought_resistance'}	cold regulated 15b [Source:NCBI gene (formerly Entrezgene);Acc:818853]	2:17708593-17710433	Arabidopsis thaliana	known
AT2G42540	2	{'salt_resistance', 'drought_resistance'}	cold-regulated 15a [Source:NCBI gene (formerly Entrezgene);Acc:818854]	2:17710441-17712330	Arabidopsis thaliana	known
AT2G42640	2	{'disease_resistance', 'drought_resistance'}	Mitogen activated protein kinase kinase kinase-like protein [Source:NCBI gene (formerly Entrezgene);Acc:818864]	2:17758532-17764185	Arabidopsis thaliana	known
AT2G42830	2	{'disease_resistance', 'plant_height_reduce'}	K-box region and MADS-box transcription factor family protein [Source:NCBI gene (formerly Entrezgene);Acc:818883]	2:17820114-17824013	Arabidopsis thaliana	known
AT2G42880	3	{'disease_resistance', 'salt_resistance', 'drought_resistance'}	MAP kinase 20 [Source:NCBI gene (formerly Entrezgene);Acc:818888]	2:17840168-17844380	Arabidopsis thaliana	known
AT2G43000	3	{'disease_resistance', 'salt_resistance', 'drought_resistance'}	NAC domain containing protein 42 [Source:NCBI gene (formerly Entrezgene);Acc:818902]	2:17880457-17882636	Arabidopsis thaliana	known
AT2G43790	3	{'disease_resistance', 'salt_resistance', 'drought_resistance'}	MAP kinase 6 [Source:NCBI gene (formerly Entrezgene);Acc:818982]	2:18138246-18140988	Arabidopsis thaliana	known
AT2G44450	3	{'disease_resistance', 'salt_resistance', 'insect_resistance'}	beta glucosidase 15 [Source:NCBI gene (formerly Entrezgene);Acc:819052]	2:18340602-18343927	Arabidopsis thaliana	known
AT2G44460	2	{'disease_resistance', 'salt_resistance'}	beta glucosidase 28 [Source:NCBI gene (formerly Entrezgene);Acc:819053]	2:18346306-18350026	Arabidopsis thaliana	known
AT2G44470	3	{'disease_resistance', 'salt_resistance', 'insect_resistance'}	beta glucosidase 29 [Source:NCBI gene (formerly Entrezgene);Acc:819054]	2:18354186-18358679	Arabidopsis thaliana	known
AT2G44480	2	{'disease_resistance', 'salt_resistance'}	beta glucosidase 17 [Source:NCBI gene (formerly Entrezgene);Acc:819055]	2:18359663-18363346	Arabidopsis thaliana	known
AT2G44490	3	{'disease_resistance', 'salt_resistance', 'insect_resistance'}	Glycosyl hydrolase superfamily protein [Source:NCBI gene (formerly Entrezgene);Acc:819056]	2:18364652-18367835	Arabidopsis thaliana	known
AT2G44840	3	{'disease_resistance', 'salt_resistance', 'drought_resistance'}	ethylene-responsive element binding factor 13 [Source:NCBI gene (formerly Entrezgene);Acc:819093]	2:18495215-18496327	Arabidopsis thaliana	known
AT2G45480	2	{'grain_weight_increase', 'plant_height_reduce'}	growth-regulating factor 9 [Source:NCBI gene (formerly Entrezgene);Acc:819156]	2:18745249-18747634	Arabidopsis thaliana	known
AT2G45650	2	{'disease_resistance', 'plant_height_reduce'}	AGAMOUS-like 6 [Source:NCBI gene (formerly Entrezgene);Acc:819173]	2:18804190-18806586	Arabidopsis thaliana	known
AT2G45660	2	{'disease_resistance', 'plant_height_reduce'}	AGAMOUS-like 20 [Source:NCBI gene (formerly Entrezgene);Acc:819174]	2:18807505-18811125	Arabidopsis thaliana	known
AT2G46070	3	{'disease_resistance', 'salt_resistance', 'drought_resistance'}	mitogen-activated protein kinase 12 [Source:NCBI gene (formerly Entrezgene);Acc:819215]	2:18945937-18948067	Arabidopsis thaliana	known
AT2G46400	2	{'salt_resistance', 'drought_resistance'}	WRKY DNA-binding protein 46 [Source:NCBI gene (formerly Entrezgene);Acc:819248]	2:19043411-19044955	Arabidopsis thaliana	known
AT2G46770	2	{'salt_resistance', 'drought_resistance'}	NAC (No Apical Meristem) domain transcriptional regulator superfamily protein [Source:NCBI gene (formerly Entrezgene);Acc:819290]	2:19220725-19222916	Arabidopsis thaliana	known
AT2G47460	3	{'salt_resistance', 'insect_resistance', 'drought_resistance'}	myb domain protein 12 [Source:NCBI gene (formerly Entrezgene);Acc:819359]	2:19476326-19479597	Arabidopsis thaliana	known
AT2G47520	3	{'disease_resistance', 'salt_resistance', 'drought_resistance'}	Integrase-type DNA-binding superfamily protein [Source:NCBI gene (formerly Entrezgene);Acc:819365]	2:19502776-19503702	Arabidopsis thaliana	known
AT2G47800	2	{'salt_resistance', 'drought_resistance'}	multidrug resistance-associated protein 4 [Source:NCBI gene (formerly Entrezgene);Acc:819392]	2:19574666-19580615	Arabidopsis thaliana	known
AT3G01090	3	{'disease_resistance', 'salt_resistance', 'drought_resistance'}	SNF1 kinase homolog 10 [Source:NCBI gene (formerly Entrezgene);Acc:821259]	3:31145-34670	Arabidopsis thaliana	known
AT3G01140	3	{'salt_resistance', 'insect_resistance', 'drought_resistance'}	myb domain protein 106 [Source:NCBI gene (formerly Entrezgene);Acc:821209]	3:46330-48296	Arabidopsis thaliana	known
AT3G02310	2	{'disease_resistance', 'plant_height_reduce'}	K-box region and MADS-box transcription factor family protein [Source:NCBI gene (formerly Entrezgene);Acc:821151]	3:464279-467151	Arabidopsis thaliana	known
AT3G02360	3	{'disease_resistance', 'salt_resistance', 'drought_resistance'}	6-phosphogluconate dehydrogenase family protein [Source:NCBI gene (formerly Entrezgene);Acc:821163]	3:481776-484152	Arabidopsis thaliana	known
AT3G03050	3	{'disease_resistance', 'salt_resistance', 'drought_resistance'}	cellulose synthase-like D3 [Source:NCBI gene (formerly Entrezgene);Acc:821148]	3:686981-691911	Arabidopsis thaliana	known
AT3G03200	3	{'disease_resistance', 'salt_resistance', 'drought_resistance'}	NAC domain containing protein 45 [Source:NCBI gene (formerly Entrezgene);Acc:821226]	3:734892-738629	Arabidopsis thaliana	known
AT3G03450	3	{'grain_weight_increase', 'salt_resistance', 'plant_height_reduce'}	RGA-like 2 [Source:NCBI gene (formerly Entrezgene);Acc:821251]	3:819337-821652	Arabidopsis thaliana	known
AT3G03640	3	{'disease_resistance', 'salt_resistance', 'insect_resistance'}	beta glucosidase 25 [Source:NCBI gene (formerly Entrezgene);Acc:821201]	3:880988-884157	Arabidopsis thaliana	known
AT3G04060	3	{'disease_resistance', 'salt_resistance', 'drought_resistance'}	NAC domain containing protein 46 [Source:NCBI gene (formerly Entrezgene);Acc:819561]	3:1053360-1055196	Arabidopsis thaliana	known
AT3G04070	4	{'disease_resistance', 'grain_weight_increase', 'salt_resistance', 'drought_resistance'}	NAC domain containing protein 47 [Source:NCBI gene (formerly Entrezgene);Acc:819562]	3:1061300-1063234	Arabidopsis thaliana	known
AT3G05710	2	{'disease_resistance', 'salt_resistance'}	syntaxin of plants 43 [Source:NCBI gene (formerly Entrezgene);Acc:819740]	3:1684946-1687664	Arabidopsis thaliana	known
AT3G06230	3	{'disease_resistance', 'salt_resistance', 'drought_resistance'}	MAP kinase kinase 8 [Source:NCBI gene (formerly Entrezgene);Acc:819797]	3:1885496-1886377	Arabidopsis thaliana	known
AT3G06620	2	{'disease_resistance', 'drought_resistance'}	PAS domain-containing protein tyrosine kinase family protein [Source:NCBI gene (formerly Entrezgene);Acc:819841]	3:2062131-2067417	Arabidopsis thaliana	known
AT3G06630	2	{'disease_resistance', 'drought_resistance'}	protein kinase family protein [Source:NCBI gene (formerly Entrezgene);Acc:819842]	3:2069369-2074087	Arabidopsis thaliana	known
AT3G06640	2	{'disease_resistance', 'drought_resistance'}	PAS domain-containing protein tyrosine kinase family protein [Source:NCBI gene (formerly Entrezgene);Acc:819844]	3:2074185-2078613	Arabidopsis thaliana	known
AT3G07770	2	{'disease_resistance', 'salt_resistance'}	HEAT SHOCK PROTEIN 89.1 [Source:NCBI gene (formerly Entrezgene);Acc:819968]	3:2478887-2484282	Arabidopsis thaliana	known
AT3G08870	2	{'salt_resistance', 'plant_height_reduce'}	Concanavalin A-like lectin protein kinase family protein [Source:NCBI gene (formerly Entrezgene);Acc:820035]	3:2700261-2702745	Arabidopsis thaliana	known
AT3G09230	2	{'salt_resistance', 'drought_resistance'}	myb domain protein 1 [Source:NCBI gene (formerly Entrezgene);Acc:820079]	3:2833346-2835390	Arabidopsis thaliana	known
AT3G09260	3	{'disease_resistance', 'salt_resistance', 'insect_resistance'}	Glycosyl hydrolase superfamily protein [Source:NCBI gene (formerly Entrezgene);Acc:820082]	3:2840477-2843781	Arabidopsis thaliana	known
AT3G09370	2	{'salt_resistance', 'drought_resistance'}	myb domain protein 3r-3 [Source:NCBI gene (formerly Entrezgene);Acc:820094]	3:2879353-2882396	Arabidopsis thaliana	known
AT3G10480	2	{'salt_resistance', 'drought_resistance'}	NAC domain containing protein 50 [Source:NCBI gene (formerly Entrezgene);Acc:820212]	3:3264194-3267695	Arabidopsis thaliana	known
AT3G10490	2	{'salt_resistance', 'drought_resistance'}	NAC domain containing protein 52 [Source:NCBI gene (formerly Entrezgene);Acc:820213]	3:3267825-3271202	Arabidopsis thaliana	known
AT3G10500	2	{'salt_resistance', 'drought_resistance'}	NAC domain containing protein 53 [Source:NCBI gene (formerly Entrezgene);Acc:820214]	3:3271217-3274176	Arabidopsis thaliana	known
AT3G10660	2	{'disease_resistance', 'salt_resistance'}	calmodulin-domain protein kinase cdpk [Source:NCBI gene (formerly Entrezgene);Acc:820235]	3:3331064-3334986	Arabidopsis thaliana	known
AT3G11020	2	{'salt_resistance', 'drought_resistance'}	DRE/CRT-binding protein 2B [Source:NCBI gene (formerly Entrezgene);Acc:820273]	3:3455355-3457342	Arabidopsis thaliana	known
AT3G11180	2	{'salt_resistance', 'insect_resistance'}	2-oxoglutarate (2OG) and Fe(II)-dependent oxygenase superfamily protein [Source:NCBI gene (formerly Entrezgene);Acc:820289]	3:3503917-3507113	Arabidopsis thaliana	known
AT3G11410	3	{'disease_resistance', 'salt_resistance', 'drought_resistance'}	protein phosphatase 2CA [Source:NCBI gene (formerly Entrezgene);Acc:820314]	3:3583782-3585850	Arabidopsis thaliana	known
AT3G13080	2	{'salt_resistance', 'drought_resistance'}	multidrug resistance-associated protein 3 [Source:NCBI gene (formerly Entrezgene);Acc:820496]	3:4195770-4201734	Arabidopsis thaliana	known
AT3G13090	2	{'salt_resistance', 'drought_resistance'}	multidrug resistance-associated protein 8 [Source:NCBI gene (formerly Entrezgene);Acc:820497]	3:4202811-4208261	Arabidopsis thaliana	known
AT3G13100	2	{'salt_resistance', 'drought_resistance'}	multidrug resistance-associated protein 7 [Source:NCBI gene (formerly Entrezgene);Acc:820498]	3:4208729-4214530	Arabidopsis thaliana	known
AT3G13380	2	{'disease_resistance', 'grain_weight_increase'}	BRI1-like 3 [Source:NCBI gene (formerly Entrezgene);Acc:820538]	3:4346330-4350939	Arabidopsis thaliana	known
AT3G13540	4	{'disease_resistance', 'salt_resistance', 'insect_resistance', 'drought_resistance'}	myb domain protein 5 [Source:NCBI gene (formerly Entrezgene);Acc:820556]	3:4419960-4421751	Arabidopsis thaliana	known
AT3G13730	2	{'disease_resistance', 'grain_weight_increase'}	cytochrome P450, family 90, subfamily D, polypeptide 1 [Source:NCBI gene (formerly Entrezgene);Acc:820582]	3:4497893-4500920	Arabidopsis thaliana	known
AT3G13782	2	{'disease_resistance', 'salt_resistance'}	nucleosome assembly protein1;4 [Source:NCBI gene (formerly Entrezgene);Acc:820589]	3:4526220-4528646	Arabidopsis thaliana	known
AT3G13960	3	{'disease_resistance', 'grain_weight_increase', 'plant_height_reduce'}	growth-regulating factor 5 [Source:NCBI gene (formerly Entrezgene);Acc:820609]	3:4608076-4610497	Arabidopsis thaliana	known
AT3G14440	3	{'disease_resistance', 'salt_resistance', 'drought_resistance'}	nine-cis-epoxycarotenoid dioxygenase 3 [Source:NCBI gene (formerly Entrezgene);Acc:820667]	3:4831286-4834015	Arabidopsis thaliana	known
AT3G14720	3	{'disease_resistance', 'salt_resistance', 'drought_resistance'}	MAP kinase 19 [Source:NCBI gene (formerly Entrezgene);Acc:820700]	3:4945601-4949042	Arabidopsis thaliana	known
AT3G15170	3	{'disease_resistance', 'salt_resistance', 'drought_resistance'}	NAC (No Apical Meristem) domain transcriptional regulator superfamily protein [Source:NCBI gene (formerly Entrezgene);Acc:820748]	3:5109782-5111608	Arabidopsis thaliana	known
AT3G15210	2	{'salt_resistance', 'drought_resistance'}	ethylene responsive element binding factor 4 [Source:NCBI gene (formerly Entrezgene);Acc:820752]	3:5121303-5122562	Arabidopsis thaliana	known
AT3G15500	4	{'disease_resistance', 'grain_weight_increase', 'salt_resistance', 'drought_resistance'}	NAC domain containing protein 3 [Source:NCBI gene (formerly Entrezgene);Acc:820789]	3:5234457-5236196	Arabidopsis thaliana	known
AT3G15510	5	{'grain_weight_increase', 'disease_resistance', 'drought_resistance', 'plant_height_reduce', 'salt_resistance'}	NAC domain containing protein 2 [Source:NCBI gene (formerly Entrezgene);Acc:820790]	3:5243432-5245510	Arabidopsis thaliana	known
AT3G15730	2	{'salt_resistance', 'drought_resistance'}	phospholipase D alpha 1 [Source:NCBI gene (formerly Entrezgene);Acc:820816]	3:5330194-5333745	Arabidopsis thaliana	known
AT3G16050	2	{'salt_resistance', 'drought_resistance'}				known
AT3G16280	2	{'salt_resistance', 'drought_resistance'}	Integrase-type DNA-binding superfamily protein [Source:NCBI gene (formerly Entrezgene);Acc:820874]	3:5518211-5519271	Arabidopsis thaliana	known
AT3G16340	4	{'disease_resistance', 'salt_resistance', 'insect_resistance', 'drought_resistance'}	pleiotropic drug resistance 1 [Source:NCBI gene (formerly Entrezgene);Acc:820881]	3:5539385-5546487	Arabidopsis thaliana	known
AT3G16370	2	{'disease_resistance', 'drought_resistance'}	GDSL-like Lipase/Acylhydrolase superfamily protein [Source:NCBI gene (formerly Entrezgene);Acc:820884]	3:5556710-5558982	Arabidopsis thaliana	known
AT3G16770	3	{'disease_resistance', 'salt_resistance', 'drought_resistance'}	ethylene-responsive element binding protein [Source:NCBI gene (formerly Entrezgene);Acc:820929]	3:5705541-5707084	Arabidopsis thaliana	known
AT3G16940	2	{'salt_resistance', 'insect_resistance'}	calmodulin-binding transcription activator [Source:NCBI gene (formerly Entrezgene);Acc:820950]	3:5781418-5786310	Arabidopsis thaliana	known
AT3G17510	3	{'disease_resistance', 'salt_resistance', 'drought_resistance'}	CBL-interacting protein kinase 1 [Source:NCBI gene (formerly Entrezgene);Acc:821016]	3:5988924-5993001	Arabidopsis thaliana	known
AT3G17820	2	{'grain_weight_increase', 'plant_height_reduce'}	glutamine synthetase 1.3 [Source:NCBI gene (formerly Entrezgene);Acc:821050]	3:6097201-6099595	Arabidopsis thaliana	known
AT3G18040	3	{'disease_resistance', 'salt_resistance', 'drought_resistance'}	MAP kinase 9 [Source:NCBI gene (formerly Entrezgene);Acc:821329]	3:6174239-6178534	Arabidopsis thaliana	known
AT3G18070	2	{'disease_resistance', 'salt_resistance'}	beta glucosidase 43 [Source:NCBI gene (formerly Entrezgene);Acc:821332]	3:6187267-6190180	Arabidopsis thaliana	known
AT3G18080	2	{'disease_resistance', 'salt_resistance'}	B-S glucosidase 44 [Source:NCBI gene (formerly Entrezgene);Acc:821333]	3:6191461-6194452	Arabidopsis thaliana	known
AT3G19270	2	{'salt_resistance', 'drought_resistance'}	cytochrome P450, family 707, subfamily A, polypeptide 4 [Source:NCBI gene (formerly Entrezgene);Acc:821461]	3:6673689-6676521	Arabidopsis thaliana	known
AT3G19290	2	{'salt_resistance', 'drought_resistance'}	ABRE binding factor 4 [Source:NCBI gene (formerly Entrezgene);Acc:821463]	3:6687042-6690123	Arabidopsis thaliana	known
AT3G19390	3	{'disease_resistance', 'salt_resistance', 'drought_resistance'}	Granulin repeat cysteine protease family protein [Source:NCBI gene (formerly Entrezgene);Acc:821473]	3:6722825-6725110	Arabidopsis thaliana	known
AT3G19400	3	{'disease_resistance', 'salt_resistance', 'drought_resistance'}	Cysteine proteinases superfamily protein [Source:NCBI gene (formerly Entrezgene);Acc:821474]	3:6725383-6727105	Arabidopsis thaliana	known
AT3G20310	3	{'disease_resistance', 'salt_resistance', 'drought_resistance'}	ethylene response factor 7 [Source:NCBI gene (formerly Entrezgene);Acc:821575]	3:7084727-7086894	Arabidopsis thaliana	known
AT3G20410	2	{'disease_resistance', 'salt_resistance'}	calmodulin-domain protein kinase 9 [Source:NCBI gene (formerly Entrezgene);Acc:821586]	3:7115819-7119144	Arabidopsis thaliana	known
AT3G20530	2	{'disease_resistance', 'salt_resistance'}	Protein kinase superfamily protein [Source:NCBI gene (formerly Entrezgene);Acc:821599]	3:7166027-7168060	Arabidopsis thaliana	known
AT3G20770	2	{'disease_resistance', 'salt_resistance'}	Ethylene insensitive 3 family protein [Source:NCBI gene (formerly Entrezgene);Acc:821625]	3:7260429-7263384	Arabidopsis thaliana	known
AT3G21220	3	{'disease_resistance', 'salt_resistance', 'drought_resistance'}	MAP kinase kinase 5 [Source:NCBI gene (formerly Entrezgene);Acc:821676]	3:7445604-7448498	Arabidopsis thaliana	known
AT3G21250	2	{'salt_resistance', 'drought_resistance'}	multidrug resistance-associated protein 6 [Source:NCBI gene (formerly Entrezgene);Acc:821679]	3:7457433-7463644	Arabidopsis thaliana	known
AT3G21340	2	{'disease_resistance', 'grain_weight_increase'}	Leucine-rich repeat protein kinase family protein [Source:NCBI gene (formerly Entrezgene);Acc:821688]	3:7511756-7516073	Arabidopsis thaliana	known
AT3G21370	3	{'disease_resistance', 'salt_resistance', 'insect_resistance'}	beta glucosidase 19 [Source:NCBI gene (formerly Entrezgene);Acc:821691]	3:7524054-7527677	Arabidopsis thaliana	known
AT3G22235	2	{'salt_resistance', 'drought_resistance'}	cysteine-rich TM module stress tolerance protein [Source:NCBI gene (formerly Entrezgene);Acc:821791]	3:7854419-7855814	Arabidopsis thaliana	known
AT3G22240	2	{'salt_resistance', 'drought_resistance'}	cysteine-rich/transmembrane domain PCC1-like protein [Source:NCBI gene (formerly Entrezgene);Acc:821794]	3:7863606-7864895	Arabidopsis thaliana	known
AT3G22400	2	{'disease_resistance', 'insect_resistance'}	PLAT/LH2 domain-containing lipoxygenase family protein [Source:NCBI gene (formerly Entrezgene);Acc:821808]	3:7926728-7931351	Arabidopsis thaliana	known
AT3G23000	3	{'disease_resistance', 'salt_resistance', 'drought_resistance'}	CBL-interacting protein kinase 7 [Source:NCBI gene (formerly Entrezgene);Acc:821874]	3:8172479-8174142	Arabidopsis thaliana	known
AT3G23220	2	{'disease_resistance', 'drought_resistance'}	Integrase-type DNA-binding superfamily protein [Source:NCBI gene (formerly Entrezgene);Acc:821900]	3:8287942-8288602	Arabidopsis thaliana	known
AT3G23230	3	{'disease_resistance', 'salt_resistance', 'drought_resistance'}	Integrase-type DNA-binding superfamily protein [Source:NCBI gene (formerly Entrezgene);Acc:821901]	3:8289379-8290164	Arabidopsis thaliana	known
AT3G23240	2	{'disease_resistance', 'drought_resistance'}	ethylene response factor 1 [Source:NCBI gene (formerly Entrezgene);Acc:821902]	3:8295617-8296604	Arabidopsis thaliana	known
AT3G23250	3	{'salt_resistance', 'insect_resistance', 'drought_resistance'}	myb domain protein 15 [Source:NCBI gene (formerly Entrezgene);Acc:821904]	3:8309209-8310910	Arabidopsis thaliana	known
AT3G24220	3	{'disease_resistance', 'salt_resistance', 'drought_resistance'}	nine-cis-epoxycarotenoid dioxygenase 6 [Source:NCBI gene (formerly Entrezgene);Acc:822008]	3:8761419-8763303	Arabidopsis thaliana	known
AT3G24240	2	{'disease_resistance', 'insect_resistance'}	Leucine-rich repeat receptor-like protein kinase family protein [Source:NCBI gene (formerly Entrezgene);Acc:822011]	3:8780238-8784453	Arabidopsis thaliana	known
AT3G25180	2	{'disease_resistance', 'insect_resistance'}	cytochrome P450, family 82, subfamily G, polypeptide 1 [Source:NCBI gene (formerly Entrezgene);Acc:822110]	3:9167138-9169301	Arabidopsis thaliana	known
AT3G25560	2	{'disease_resistance', 'grain_weight_increase'}	NSP-interacting kinase 2 [Source:NCBI gene (formerly Entrezgene);Acc:822143]	3:9279513-9282906	Arabidopsis thaliana	known
AT3G25760	2	{'salt_resistance', 'insect_resistance'}	allene oxide cyclase 1 [Source:NCBI gene (formerly Entrezgene);Acc:822167]	3:9403779-9405338	Arabidopsis thaliana	known
AT3G25770	2	{'salt_resistance', 'insect_resistance'}	allene oxide cyclase 2 [Source:NCBI gene (formerly Entrezgene);Acc:822168]	3:9406669-9408071	Arabidopsis thaliana	known
AT3G25780	2	{'salt_resistance', 'insect_resistance'}	allene oxide cyclase 3 [Source:NCBI gene (formerly Entrezgene);Acc:822169]	3:9409160-9411090	Arabidopsis thaliana	known
AT3G27785	2	{'salt_resistance', 'drought_resistance'}	myb domain protein 118 [Source:NCBI gene (formerly Entrezgene);Acc:822399]	3:10288603-10290934	Arabidopsis thaliana	known
AT3G28470	2	{'insect_resistance', 'drought_resistance'}	Duplicated homeodomain-like superfamily protein [Source:NCBI gene (formerly Entrezgene);Acc:822477]	3:10674508-10675724	Arabidopsis thaliana	known
AT3G28740	2	{'disease_resistance', 'insect_resistance'}	Cytochrome P450 superfamily protein [Source:NCBI gene (formerly Entrezgene);Acc:822506]	3:10788698-10790553	Arabidopsis thaliana	known
AT3G28910	3	{'salt_resistance', 'insect_resistance', 'drought_resistance'}	myb domain protein 30 [Source:NCBI gene (formerly Entrezgene);Acc:822525]	3:10911132-10913190	Arabidopsis thaliana	known
AT3G29020	2	{'salt_resistance', 'drought_resistance'}	myb domain protein 110 [Source:NCBI gene (formerly Entrezgene);Acc:822542]	3:11008079-11009456	Arabidopsis thaliana	known
AT3G29035	5	{'grain_weight_increase', 'disease_resistance', 'drought_resistance', 'plant_height_reduce', 'salt_resistance'}	NAC domain containing protein 3 [Source:NCBI gene (formerly Entrezgene);Acc:822547]	3:11033665-11035308	Arabidopsis thaliana	known
AT3G29160	3	{'disease_resistance', 'salt_resistance', 'drought_resistance'}	SNF1 kinase homolog 11 [Source:NCBI gene (formerly Entrezgene);Acc:822566]	3:11128620-11132105	Arabidopsis thaliana	known
AT3G30260	2	{'disease_resistance', 'plant_height_reduce'}	AGAMOUS-like 79 [Source:NCBI gene (formerly Entrezgene);Acc:822726]	3:11908870-11913166	Arabidopsis thaliana	known
AT3G43960	3	{'disease_resistance', 'salt_resistance', 'drought_resistance'}	Cysteine proteinases superfamily protein [Source:NCBI gene (formerly Entrezgene);Acc:823513]	3:15774053-15775873	Arabidopsis thaliana	known
AT3G44290	2	{'salt_resistance', 'drought_resistance'}	NAC domain containing protein 60 [Source:NCBI gene (formerly Entrezgene);Acc:823554]	3:15972673-15975250	Arabidopsis thaliana	known
AT3G44460	2	{'salt_resistance', 'drought_resistance'}	Basic-leucine zipper (bZIP) transcription factor family protein [Source:NCBI gene (formerly Entrezgene);Acc:823571]	3:16079432-16081906	Arabidopsis thaliana	known
AT3G44490	2	{'salt_resistance', 'drought_resistance'}	histone deacetylase 17 [Source:NCBI gene (formerly Entrezgene);Acc:823574]	3:16097479-16098599	Arabidopsis thaliana	known
AT3G44660	2	{'salt_resistance', 'drought_resistance'}	histone deacetylase 10 [Source:NCBI gene (formerly Entrezgene);Acc:823592]	3:16214964-16215785	Arabidopsis thaliana	known
AT3G44680	2	{'salt_resistance', 'drought_resistance'}	histone deacetylase 9 [Source:NCBI gene (formerly Entrezgene);Acc:823594]	3:16226519-16230009	Arabidopsis thaliana	known
AT3G45140	2	{'disease_resistance', 'insect_resistance'}	lipoxygenase 2 [Source:NCBI gene (formerly Entrezgene);Acc:823650]	3:16525245-16529352	Arabidopsis thaliana	known
AT3G45310	2	{'salt_resistance', 'drought_resistance'}	Cysteine proteinases superfamily protein [Source:NCBI gene (formerly Entrezgene);Acc:823669]	3:16628210-16630570	Arabidopsis thaliana	known
AT3G45330	2	{'salt_resistance', 'plant_height_reduce'}	Concanavalin A-like lectin protein kinase family protein [Source:NCBI gene (formerly Entrezgene);Acc:823671]	3:16632261-16634569	Arabidopsis thaliana	known
AT3G45390	2	{'salt_resistance', 'plant_height_reduce'}	LOW protein: L-type lectin-domain receptor kinase-like protein [Source:NCBI gene (formerly Entrezgene);Acc:823677]	3:16647921-16649974	Arabidopsis thaliana	known
AT3G45410	2	{'salt_resistance', 'plant_height_reduce'}	Concanavalin A-like lectin protein kinase family protein [Source:NCBI gene (formerly Entrezgene);Acc:823679]	3:16653899-16656575	Arabidopsis thaliana	known
AT3G45430	2	{'salt_resistance', 'plant_height_reduce'}	Concanavalin A-like lectin protein kinase family protein [Source:NCBI gene (formerly Entrezgene);Acc:823681]	3:16660575-16664146	Arabidopsis thaliana	known
AT3G45640	3	{'disease_resistance', 'salt_resistance', 'drought_resistance'}	mitogen-activated protein kinase 3 [Source:NCBI gene (formerly Entrezgene);Acc:823706]	3:16756571-16758874	Arabidopsis thaliana	known
AT3G45860	3	{'disease_resistance', 'salt_resistance', 'drought_resistance'}	cysteine-rich RLK (RECEPTOR-like protein kinase) 4 [Source:NCBI gene (formerly Entrezgene);Acc:823729]	3:16863088-16866261	Arabidopsis thaliana	known
AT3G46000	2	{'disease_resistance', 'insect_resistance'}	actin depolymerizing factor 2 [Source:NCBI gene (formerly Entrezgene);Acc:823743]	3:16907334-16909119	Arabidopsis thaliana	known
AT3G46010	2	{'disease_resistance', 'insect_resistance'}	actin depolymerizing factor 1 [Source:NCBI gene (formerly Entrezgene);Acc:823744]	3:16909217-16910845	Arabidopsis thaliana	known
AT3G46230	2	{'disease_resistance', 'salt_resistance'}	heat shock protein 17.4 [Source:NCBI gene (formerly Entrezgene);Acc:823768]	3:16984118-16984867	Arabidopsis thaliana	known
AT3G46340	2	{'disease_resistance', 'grain_weight_increase'}	Leucine-rich repeat protein kinase family protein [Source:NCBI gene (formerly Entrezgene);Acc:823779]	3:17026658-17031897	Arabidopsis thaliana	known
AT3G46760	2	{'salt_resistance', 'plant_height_reduce'}	Protein kinase superfamily protein [Source:NCBI gene (formerly Entrezgene);Acc:823829]	3:17221936-17223272	Arabidopsis thaliana	known
AT3G47450	2	{'disease_resistance', 'salt_resistance'}	P-loop containing nucleoside triphosphate hydrolases superfamily protein [Source:NCBI gene (formerly Entrezgene);Acc:823899]	3:17483068-17486347	Arabidopsis thaliana	known
AT3G47600	3	{'salt_resistance', 'insect_resistance', 'drought_resistance'}	myb domain protein 94 [Source:NCBI gene (formerly Entrezgene);Acc:823914]	3:17539289-17541307	Arabidopsis thaliana	known
AT3G48010	2	{'disease_resistance', 'salt_resistance'}	cyclic nucleotide-gated channel 16 [Source:NCBI gene (formerly Entrezgene);Acc:823956]	3:17721137-17724140	Arabidopsis thaliana	known
AT3G48340	3	{'disease_resistance', 'salt_resistance', 'drought_resistance'}	Cysteine proteinases superfamily protein [Source:NCBI gene (formerly Entrezgene);Acc:823992]	3:17897506-17899351	Arabidopsis thaliana	known
AT3G48350	3	{'disease_resistance', 'salt_resistance', 'drought_resistance'}	Cysteine proteinases superfamily protein [Source:NCBI gene (formerly Entrezgene);Acc:823993]	3:17905725-17907690	Arabidopsis thaliana	known
AT3G48750	3	{'disease_resistance', 'salt_resistance', 'drought_resistance'}	cell division control 2 [Source:NCBI gene (formerly Entrezgene);Acc:824036]	3:18071454-18074641	Arabidopsis thaliana	known
AT3G49340	3	{'disease_resistance', 'salt_resistance', 'drought_resistance'}	Cysteine proteinases superfamily protein [Source:NCBI gene (formerly Entrezgene);Acc:824096]	3:18293173-18294621	Arabidopsis thaliana	known
AT3G49500	2	{'disease_resistance', 'salt_resistance'}	RNA-dependent RNA polymerase 6 [Source:NCBI gene (formerly Entrezgene);Acc:824112]	3:18348974-18353673	Arabidopsis thaliana	known
AT3G49530	2	{'salt_resistance', 'drought_resistance'}	NAC domain containing protein 62 [Source:NCBI gene (formerly Entrezgene);Acc:824115]	3:18362443-18364959	Arabidopsis thaliana	known
AT3G50060	2	{'salt_resistance', 'drought_resistance'}	myb domain protein 77 [Source:NCBI gene (formerly Entrezgene);Acc:824168]	3:18557607-18559326	Arabidopsis thaliana	known
AT3G50260	2	{'salt_resistance', 'drought_resistance'}	cooperatively regulated by ethylene and jasmonate 1 [Source:NCBI gene (formerly Entrezgene);Acc:824188]	3:18634546-18635514	Arabidopsis thaliana	known
AT3G50500	3	{'disease_resistance', 'salt_resistance', 'drought_resistance'}	SNF1-related protein kinase 2.2 [Source:NCBI gene (formerly Entrezgene);Acc:824214]	3:18741444-18744174	Arabidopsis thaliana	known
AT3G50650	2	{'salt_resistance', 'drought_resistance'}	GRAS family transcription factor [Source:NCBI gene (formerly Entrezgene);Acc:824228]	3:18806139-18808243	Arabidopsis thaliana	known
AT3G50660	2	{'disease_resistance', 'grain_weight_increase'}	Cytochrome P450 superfamily protein [Source:NCBI gene (formerly Entrezgene);Acc:824229]	3:18813949-18817405	Arabidopsis thaliana	known
AT3G51850	2	{'disease_resistance', 'salt_resistance'}	calcium-dependent protein kinase 13 [Source:NCBI gene (formerly Entrezgene);Acc:824348]	3:19232358-19235891	Arabidopsis thaliana	known
AT3G51880	2	{'salt_resistance', 'drought_resistance'}	high mobility group B1 [Source:NCBI gene (formerly Entrezgene);Acc:824351]	3:19246936-19249200	Arabidopsis thaliana	known
AT3G52430	2	{'disease_resistance', 'insect_resistance'}	alpha/beta-Hydrolases superfamily protein [Source:NCBI gene (formerly Entrezgene);Acc:824408]	3:19431095-19434450	Arabidopsis thaliana	known
AT3G52910	3	{'disease_resistance', 'grain_weight_increase', 'plant_height_reduce'}	growth-regulating factor 4 [Source:NCBI gene (formerly Entrezgene);Acc:824457]	3:19615977-19618507	Arabidopsis thaliana	known
AT3G53480	4	{'disease_resistance', 'salt_resistance', 'insect_resistance', 'drought_resistance'}	pleiotropic drug resistance 9 [Source:NCBI gene (formerly Entrezgene);Acc:824516]	3:19825267-19831880	Arabidopsis thaliana	known
AT3G53810	3	{'disease_resistance', 'salt_resistance', 'plant_height_reduce'}	Concanavalin A-like lectin protein kinase family protein [Source:NCBI gene (formerly Entrezgene);Acc:824548]	3:19932970-19935392	Arabidopsis thaliana	known
AT3G53840	3	{'disease_resistance', 'salt_resistance', 'drought_resistance'}	Protein kinase superfamily protein [Source:NCBI gene (formerly Entrezgene);Acc:824551]	3:19945571-19947844	Arabidopsis thaliana	known
AT3G54940	2	{'salt_resistance', 'drought_resistance'}	Papain family cysteine protease [Source:NCBI gene (formerly Entrezgene);Acc:824659]	3:20354351-20356363	Arabidopsis thaliana	known
AT3G55550	3	{'disease_resistance', 'salt_resistance', 'plant_height_reduce'}	Concanavalin A-like lectin protein kinase family protein [Source:NCBI gene (formerly Entrezgene);Acc:824720]	3:20599978-20602129	Arabidopsis thaliana	known
AT3G55590	2	{'disease_resistance', 'salt_resistance'}	Glucose-1-phosphate adenylyltransferase family protein [Source:NCBI gene (formerly Entrezgene);Acc:824724]	3:20617049-20618881	Arabidopsis thaliana	known
AT3G55730	2	{'salt_resistance', 'drought_resistance'}	myb domain protein 109 [Source:NCBI gene (formerly Entrezgene);Acc:824739]	3:20681827-20684063	Arabidopsis thaliana	known
AT3G55970	2	{'salt_resistance', 'insect_resistance'}	jasmonate-regulated 21 [Source:NCBI gene (formerly Entrezgene);Acc:824763]	3:20766735-20769410	Arabidopsis thaliana	known
AT3G56400	4	{'disease_resistance', 'salt_resistance', 'insect_resistance', 'drought_resistance'}	WRKY DNA-binding protein 70 [Source:NCBI gene (formerly Entrezgene);Acc:824807]	3:20908711-20910623	Arabidopsis thaliana	known
AT3G56440	2	{'salt_resistance', 'drought_resistance'}	autophagy 18 D-like protein [Source:NCBI gene (formerly Entrezgene);Acc:824811]	3:20926001-20928993	Arabidopsis thaliana	known
AT3G56850	2	{'salt_resistance', 'drought_resistance'}	ABA-responsive element binding protein 3 [Source:NCBI gene (formerly Entrezgene);Acc:824852]	3:21046234-21048614	Arabidopsis thaliana	known
AT3G57230	2	{'disease_resistance', 'plant_height_reduce'}	AGAMOUS-like 16 [Source:NCBI gene (formerly Entrezgene);Acc:824890]	3:21177282-21181026	Arabidopsis thaliana	known
AT3G57530	2	{'disease_resistance', 'salt_resistance'}	calcium-dependent protein kinase 32 [Source:NCBI gene (formerly Entrezgene);Acc:824920]	3:21296457-21299704	Arabidopsis thaliana	known
AT3G57540	2	{'salt_resistance', 'drought_resistance'}	Remorin family protein [Source:NCBI gene (formerly Entrezgene);Acc:824921]	3:21301397-21303230	Arabidopsis thaliana	known
AT3G57600	2	{'salt_resistance', 'drought_resistance'}	Integrase-type DNA-binding superfamily protein [Source:NCBI gene (formerly Entrezgene);Acc:824929]	3:21332774-21333918	Arabidopsis thaliana	known
AT3G58640	2	{'disease_resistance', 'drought_resistance'}	Mitogen activated protein kinase kinase kinase-like protein [Source:NCBI gene (formerly Entrezgene);Acc:825033]	3:21686741-21693928	Arabidopsis thaliana	known
AT3G58690	3	{'disease_resistance', 'grain_weight_increase', 'drought_resistance'}	Protein kinase superfamily protein [Source:NCBI gene (formerly Entrezgene);Acc:825038]	3:21709128-21711400	Arabidopsis thaliana	known
AT3G58780	2	{'disease_resistance', 'plant_height_reduce'}	K-box region and MADS-box transcription factor family protein [Source:NCBI gene (formerly Entrezgene);Acc:825047]	3:21738160-21742517	Arabidopsis thaliana	known
AT3G59140	2	{'salt_resistance', 'drought_resistance'}	multidrug resistance-associated protein 14 [Source:NCBI gene (formerly Entrezgene);Acc:825083]	3:21863348-21869036	Arabidopsis thaliana	known
AT3G59280	2	{'salt_resistance', 'drought_resistance'}	Protein Transporter, Pam16 [Source:NCBI gene (formerly Entrezgene);Acc:825097]	3:21908429-21910738	Arabidopsis thaliana	known
AT3G59700	3	{'disease_resistance', 'salt_resistance', 'plant_height_reduce'}	lectin-receptor kinase [Source:NCBI gene (formerly Entrezgene);Acc:825139]	3:22052121-22054394	Arabidopsis thaliana	known
AT3G59730	3	{'disease_resistance', 'salt_resistance', 'plant_height_reduce'}	Concanavalin A-like lectin protein kinase family protein [Source:NCBI gene (formerly Entrezgene);Acc:825142]	3:22064192-22065957	Arabidopsis thaliana	known
AT3G59740	3	{'disease_resistance', 'salt_resistance', 'plant_height_reduce'}	Concanavalin A-like lectin protein kinase family protein [Source:NCBI gene (formerly Entrezgene);Acc:825143]	3:22066987-22069058	Arabidopsis thaliana	known
AT3G59750	3	{'disease_resistance', 'salt_resistance', 'plant_height_reduce'}	Concanavalin A-like lectin protein kinase family protein [Source:NCBI gene (formerly Entrezgene);Acc:825144]	3:22069830-22071837	Arabidopsis thaliana	known
AT3G59790	3	{'disease_resistance', 'salt_resistance', 'drought_resistance'}	MAP kinase 10 [Source:NCBI gene (formerly Entrezgene);Acc:825148]	3:22092400-22094403	Arabidopsis thaliana	known
AT3G60120	3	{'disease_resistance', 'salt_resistance', 'insect_resistance'}	beta glucosidase 27 [Source:NCBI gene (formerly Entrezgene);Acc:825182]	3:22205931-22209156	Arabidopsis thaliana	known
AT3G60130	2	{'disease_resistance', 'salt_resistance'}	beta glucosidase 16 [Source:NCBI gene (formerly Entrezgene);Acc:825183]	3:22210026-22213882	Arabidopsis thaliana	known
AT3G60140	3	{'disease_resistance', 'salt_resistance', 'insect_resistance'}	Glycosyl hydrolase superfamily protein [Source:NCBI gene (formerly Entrezgene);Acc:825184]	3:22216540-22220824	Arabidopsis thaliana	known
AT3G60160	2	{'salt_resistance', 'drought_resistance'}	multidrug resistance-associated protein 9 [Source:NCBI gene (formerly Entrezgene);Acc:825186]	3:22223264-22229487	Arabidopsis thaliana	known
AT3G60970	2	{'salt_resistance', 'drought_resistance'}	multidrug resistance-associated protein 15 [Source:NCBI gene (formerly Entrezgene);Acc:825269]	3:22557282-22561716	Arabidopsis thaliana	known
AT3G61120	2	{'disease_resistance', 'plant_height_reduce'}	AGAMOUS-like 13 [Source:NCBI gene (formerly Entrezgene);Acc:825284]	3:22618259-22620529	Arabidopsis thaliana	known
AT3G61190	2	{'disease_resistance', 'salt_resistance'}	BON association protein 1 [Source:NCBI gene (formerly Entrezgene);Acc:825291]	3:22650159-22651636	Arabidopsis thaliana	known
AT3G61250	3	{'salt_resistance', 'insect_resistance', 'drought_resistance'}	myb domain protein 17 [Source:NCBI gene (formerly Entrezgene);Acc:825297]	3:22670729-22672751	Arabidopsis thaliana	known
AT3G61630	3	{'disease_resistance', 'salt_resistance', 'drought_resistance'}		3:22804998-22806527	Arabidopsis thaliana	known
AT3G61910	2	{'salt_resistance', 'drought_resistance'}	NAC domain protein 66 [Source:NCBI gene (formerly Entrezgene);Acc:825364]	3:22929006-22930456	Arabidopsis thaliana	known
AT3G62610	3	{'salt_resistance', 'insect_resistance', 'drought_resistance'}	myb domain protein 11 [Source:NCBI gene (formerly Entrezgene);Acc:825435]	3:23154630-23156585	Arabidopsis thaliana	known
AT3G62700	2	{'salt_resistance', 'drought_resistance'}	multidrug resistance-associated protein 10 [Source:NCBI gene (formerly Entrezgene);Acc:825444]	3:23190265-23195917	Arabidopsis thaliana	known
AT3G62740	2	{'disease_resistance', 'salt_resistance'}	beta glucosidase 7 [Source:NCBI gene (formerly Entrezgene);Acc:825449]	3:23211287-23214066	Arabidopsis thaliana	known
AT3G62750	3	{'disease_resistance', 'salt_resistance', 'insect_resistance'}	beta glucosidase 8 [Source:NCBI gene (formerly Entrezgene);Acc:825450]	3:23214247-23217084	Arabidopsis thaliana	known
AT3G62770	2	{'salt_resistance', 'drought_resistance'}	Transducin/WD40 repeat-like superfamily protein [Source:NCBI gene (formerly Entrezgene);Acc:825452]	3:23218610-23221243	Arabidopsis thaliana	known
AT3G63520	3	{'disease_resistance', 'salt_resistance', 'drought_resistance'}	carotenoid cleavage dioxygenase 1 [Source:NCBI gene (formerly Entrezgene);Acc:825527]	3:23452808-23456078	Arabidopsis thaliana	known
AT4G00240	2	{'salt_resistance', 'drought_resistance'}	phospholipase D beta 2 [Source:NCBI gene (formerly Entrezgene);Acc:826673]	4:106250-111005	Arabidopsis thaliana	known
AT4G00330	2	{'disease_resistance', 'salt_resistance'}	calmodulin-binding receptor-like cytoplasmic kinase 2 [Source:NCBI gene (formerly Entrezgene);Acc:828125]	4:142570-145719	Arabidopsis thaliana	known
AT4G00680	2	{'disease_resistance', 'insect_resistance'}	actin depolymerizing factor 8 [Source:NCBI gene (formerly Entrezgene);Acc:828037]	4:279596-281072	Arabidopsis thaliana	known
AT4G00960	3	{'disease_resistance', 'salt_resistance', 'drought_resistance'}	Protein kinase superfamily protein [Source:NCBI gene (formerly Entrezgene);Acc:827937]	4:414204-416355	Arabidopsis thaliana	known
AT4G00970	3	{'disease_resistance', 'salt_resistance', 'drought_resistance'}	cysteine-rich RLK (RECEPTOR-like protein kinase) 41 [Source:NCBI gene (formerly Entrezgene);Acc:827936]	4:418327-421885	Arabidopsis thaliana	known
AT4G01010	2	{'disease_resistance', 'salt_resistance'}	cyclic nucleotide-gated channel 13 [Source:NCBI gene (formerly Entrezgene);Acc:826427]	4:434217-437605	Arabidopsis thaliana	known
AT4G01026	2	{'salt_resistance', 'drought_resistance'}	PYR1-like 7 [Source:NCBI gene (formerly Entrezgene);Acc:827923]	4:446978-448511	Arabidopsis thaliana	known
AT4G01370	3	{'disease_resistance', 'salt_resistance', 'drought_resistance'}	MAP kinase 4 [Source:NCBI gene (formerly Entrezgene);Acc:828151]	4:566917-570299	Arabidopsis thaliana	known
AT4G01420	3	{'disease_resistance', 'salt_resistance', 'drought_resistance'}	calcineurin B-like protein 5 [Source:NCBI gene (formerly Entrezgene);Acc:826671]	4:580038-581521	Arabidopsis thaliana	known
AT4G01680	3	{'salt_resistance', 'insect_resistance', 'drought_resistance'}	myb domain protein 55 [Source:NCBI gene (formerly Entrezgene);Acc:826853]	4:715970-717603	Arabidopsis thaliana	known
AT4G02195	2	{'disease_resistance', 'salt_resistance'}	syntaxin of plants 42 [Source:NCBI gene (formerly Entrezgene);Acc:827505]	4:969994-972342	Arabidopsis thaliana	known
AT4G02380	2	{'salt_resistance', 'insect_resistance'}	senescence-associated 21 [Source:NCBI gene (formerly Entrezgene);Acc:828053]	4:1046042-1047105	Arabidopsis thaliana	known
AT4G02410	3	{'disease_resistance', 'salt_resistance', 'plant_height_reduce'}	Concanavalin A-like lectin protein kinase family protein [Source:NCBI gene (formerly Entrezgene);Acc:828032]	4:1059799-1062159	Arabidopsis thaliana	known
AT4G02420	3	{'disease_resistance', 'salt_resistance', 'plant_height_reduce'}	Concanavalin A-like lectin protein kinase family protein [Source:NCBI gene (formerly Entrezgene);Acc:828035]	4:1064114-1066571	Arabidopsis thaliana	known
AT4G03230	2	{'disease_resistance', 'salt_resistance'}	G-type lectin S-receptor-like Serine/Threonine-kinase [Source:NCBI gene (formerly Entrezgene);Acc:828018]	4:1418841-1423337	Arabidopsis thaliana	known
AT4G04450	3	{'disease_resistance', 'salt_resistance', 'drought_resistance'}	WRKY family transcription factor [Source:NCBI gene (formerly Entrezgene);Acc:825775]	4:2218042-2221260	Arabidopsis thaliana	known
AT4G04490	3	{'disease_resistance', 'salt_resistance', 'drought_resistance'}	cysteine-rich RLK (RECEPTOR-like protein kinase) 36 [Source:NCBI gene (formerly Entrezgene);Acc:825779]	4:2231717-2234689	Arabidopsis thaliana	known
AT4G04500	3	{'disease_resistance', 'salt_resistance', 'drought_resistance'}	cysteine-rich RLK (RECEPTOR-like protein kinase) 37 [Source:NCBI gene (formerly Entrezgene);Acc:825780]	4:2238370-2240921	Arabidopsis thaliana	known
AT4G04510	3	{'disease_resistance', 'salt_resistance', 'drought_resistance'}	cysteine-rich RLK (RECEPTOR-like protein kinase) 38 [Source:NCBI gene (formerly Entrezgene);Acc:825781]	4:2242072-2244930	Arabidopsis thaliana	known
AT4G04540	3	{'disease_resistance', 'salt_resistance', 'drought_resistance'}	cysteine-rich RLK (RECEPTOR-like protein kinase) 39 [Source:NCBI gene (formerly Entrezgene);Acc:825785]	4:2259498-2262320	Arabidopsis thaliana	known
AT4G04570	3	{'disease_resistance', 'salt_resistance', 'drought_resistance'}	cysteine-rich RLK (RECEPTOR-like protein kinase) 40 [Source:NCBI gene (formerly Entrezgene);Acc:825789]	4:2288616-2292965	Arabidopsis thaliana	known
AT4G04695	2	{'disease_resistance', 'salt_resistance'}	calcium-dependent protein kinase 31 [Source:NCBI gene (formerly Entrezgene);Acc:825804]	4:2381348-2384121	Arabidopsis thaliana	known
AT4G04700	2	{'disease_resistance', 'salt_resistance'}	calcium-dependent protein kinase 27 [Source:NCBI gene (formerly Entrezgene);Acc:825805]	4:2385038-2388105	Arabidopsis thaliana	known
AT4G04710	2	{'disease_resistance', 'salt_resistance'}	calcium-dependent kinase-like protein [Source:NCBI gene (formerly Entrezgene);Acc:825806]	4:2390307-2392989	Arabidopsis thaliana	known
AT4G04720	2	{'disease_resistance', 'salt_resistance'}	calcium-dependent protein kinase 21 [Source:NCBI gene (formerly Entrezgene);Acc:825807]	4:2393653-2397804	Arabidopsis thaliana	known
AT4G04740	2	{'disease_resistance', 'salt_resistance'}	calcium-dependent protein kinase 23 [Source:NCBI gene (formerly Entrezgene);Acc:825809]	4:2402897-2408737	Arabidopsis thaliana	known
AT4G04960	2	{'salt_resistance', 'plant_height_reduce'}	Concanavalin A-like lectin protein kinase family protein [Source:NCBI gene (formerly Entrezgene);Acc:825837]	4:2532906-2535386	Arabidopsis thaliana	known
AT4G05100	4	{'disease_resistance', 'salt_resistance', 'insect_resistance', 'drought_resistance'}	myb domain protein 74 [Source:NCBI gene (formerly Entrezgene);Acc:825855]	4:2618372-2619947	Arabidopsis thaliana	known
AT4G05200	3	{'disease_resistance', 'salt_resistance', 'drought_resistance'}	cysteine-rich RLK (RECEPTOR-like protein kinase) 25 [Source:NCBI gene (formerly Entrezgene);Acc:825868]	4:2679723-2682384	Arabidopsis thaliana	known
AT4G06746	2	{'salt_resistance', 'drought_resistance'}	related to AP2 9 [Source:NCBI gene (formerly Entrezgene);Acc:826148]	4:4073717-4074735	Arabidopsis thaliana	known
AT4G08850	2	{'disease_resistance', 'insect_resistance'}	Leucine-rich repeat receptor-like protein kinase family protein [Source:NCBI gene (formerly Entrezgene);Acc:826456]	4:5636479-5640952	Arabidopsis thaliana	known
AT4G09460	3	{'salt_resistance', 'insect_resistance', 'drought_resistance'}	myb domain protein 6 [Source:NCBI gene (formerly Entrezgene);Acc:826530]	4:5992908-5994258	Arabidopsis thaliana	known
AT4G09570	2	{'disease_resistance', 'salt_resistance'}	calcium-dependent protein kinase 4 [Source:NCBI gene (formerly Entrezgene);Acc:826541]	4:6049441-6052380	Arabidopsis thaliana	known
AT4G09960	2	{'disease_resistance', 'plant_height_reduce'}	K-box region and MADS-box transcription factor family protein [Source:NCBI gene (formerly Entrezgene);Acc:826586]	4:6236375-6241281	Arabidopsis thaliana	known
AT4G10250	2	{'disease_resistance', 'salt_resistance'}	HSP20-like chaperones superfamily protein [Source:NCBI gene (formerly Entrezgene);Acc:826616]	4:6370338-6371372	Arabidopsis thaliana	known
AT4G10350	3	{'disease_resistance', 'salt_resistance', 'drought_resistance'}	NAC domain containing protein 70 [Source:NCBI gene (formerly Entrezgene);Acc:826627]	4:6415120-6416961	Arabidopsis thaliana	known
AT4G11140	2	{'salt_resistance', 'drought_resistance'}	cytokinin response factor 1 [Source:NCBI gene (formerly Entrezgene);Acc:826715]	4:6794630-6796398	Arabidopsis thaliana	known
AT4G11310	3	{'disease_resistance', 'salt_resistance', 'drought_resistance'}	Papain family cysteine protease [Source:NCBI gene (formerly Entrezgene);Acc:826733]	4:6883513-6885517	Arabidopsis thaliana	known
AT4G11320	3	{'disease_resistance', 'salt_resistance', 'drought_resistance'}	Papain family cysteine protease [Source:NCBI gene (formerly Entrezgene);Acc:826734]	4:6887166-6889879	Arabidopsis thaliana	known
AT4G11330	3	{'disease_resistance', 'salt_resistance', 'drought_resistance'}	MAP kinase 5 [Source:NCBI gene (formerly Entrezgene);Acc:826735]	4:6891926-6894283	Arabidopsis thaliana	known
AT4G11460	3	{'disease_resistance', 'salt_resistance', 'drought_resistance'}	cysteine-rich RLK (RECEPTOR-like protein kinase) 30 [Source:NCBI gene (formerly Entrezgene);Acc:826751]	4:6963521-6967200	Arabidopsis thaliana	known
AT4G11470	3	{'disease_resistance', 'salt_resistance', 'drought_resistance'}	cysteine-rich RLK (RECEPTOR-like protein kinase) 31 [Source:NCBI gene (formerly Entrezgene);Acc:826752]	4:6967709-6970469	Arabidopsis thaliana	known
AT4G11480	3	{'disease_resistance', 'salt_resistance', 'drought_resistance'}	cysteine-rich RLK (RECEPTOR-like protein kinase) 32 [Source:NCBI gene (formerly Entrezgene);Acc:826753]	4:6971401-6973962	Arabidopsis thaliana	known
AT4G11490	3	{'disease_resistance', 'salt_resistance', 'drought_resistance'}	cysteine-rich RLK (RECEPTOR-like protein kinase) 33 [Source:NCBI gene (formerly Entrezgene);Acc:826754]	4:6978848-6981548	Arabidopsis thaliana	known
AT4G11530	3	{'disease_resistance', 'salt_resistance', 'drought_resistance'}	cysteine-rich RLK (RECEPTOR-like protein kinase) 34 [Source:NCBI gene (formerly Entrezgene);Acc:826757]	4:6986838-6989793	Arabidopsis thaliana	known
AT4G11830	2	{'salt_resistance', 'drought_resistance'}	phospholipase D gamma 2 [Source:NCBI gene (formerly Entrezgene);Acc:826789]	4:7115681-7121919	Arabidopsis thaliana	known
AT4G11840	2	{'salt_resistance', 'drought_resistance'}	phospholipase D gamma 3 [Source:NCBI gene (formerly Entrezgene);Acc:826790]	4:7121965-7126317	Arabidopsis thaliana	known
AT4G11850	2	{'salt_resistance', 'drought_resistance'}	phospholipase D gamma 1 [Source:NCBI gene (formerly Entrezgene);Acc:826791]	4:7129123-7133385	Arabidopsis thaliana	known
AT4G11880	2	{'disease_resistance', 'plant_height_reduce'}	AGAMOUS-like 14 [Source:NCBI gene (formerly Entrezgene);Acc:826795]	4:7142922-7147391	Arabidopsis thaliana	known
AT4G11890	3	{'disease_resistance', 'salt_resistance', 'drought_resistance'}	Protein kinase superfamily protein [Source:NCBI gene (formerly Entrezgene);Acc:826796]	4:7147865-7149942	Arabidopsis thaliana	known
AT4G11900	3	{'disease_resistance', 'salt_resistance', 'drought_resistance'}	S-locus lectin protein kinase family protein [Source:NCBI gene (formerly Entrezgene);Acc:826797]	4:7149903-7153681	Arabidopsis thaliana	known
AT4G12020	2	{'disease_resistance', 'drought_resistance'}	protein kinase family protein [Source:NCBI gene (formerly Entrezgene);Acc:826810]	4:7201522-7209692	Arabidopsis thaliana	known
AT4G12110	2	{'disease_resistance', 'drought_resistance'}	sterol-4alpha-methyl oxidase 1-1 [Source:NCBI gene (formerly Entrezgene);Acc:826819]	4:7254029-7256406	Arabidopsis thaliana	known
AT4G12350	4	{'disease_resistance', 'salt_resistance', 'insect_resistance', 'drought_resistance'}	myb domain protein 42 [Source:NCBI gene (formerly Entrezgene);Acc:826844]	4:7324756-7326867	Arabidopsis thaliana	known
AT4G13020	3	{'disease_resistance', 'salt_resistance', 'drought_resistance'}	Protein kinase superfamily protein [Source:NCBI gene (formerly Entrezgene);Acc:826915]	4:7602989-7607155	Arabidopsis thaliana	known
AT4G13620	3	{'disease_resistance', 'salt_resistance', 'drought_resistance'}	Integrase-type DNA-binding superfamily protein [Source:NCBI gene (formerly Entrezgene);Acc:826996]	4:7932131-7933579	Arabidopsis thaliana	known
AT4G14580	3	{'disease_resistance', 'salt_resistance', 'drought_resistance'}	CBL-interacting protein kinase 4 [Source:NCBI gene (formerly Entrezgene);Acc:827106]	4:8367663-8369312	Arabidopsis thaliana	known
AT4G15230	4	{'disease_resistance', 'salt_resistance', 'insect_resistance', 'drought_resistance'}	pleiotropic drug resistance 2 [Source:NCBI gene (formerly Entrezgene);Acc:827187]	4:8679754-8687519	Arabidopsis thaliana	known
AT4G16150	2	{'salt_resistance', 'insect_resistance'}		4:9148059-9153292	Arabidopsis thaliana	known
AT4G16190	2	{'salt_resistance', 'drought_resistance'}	Papain family cysteine protease [Source:NCBI gene (formerly Entrezgene);Acc:827311]	4:9171280-9173667	Arabidopsis thaliana	known
AT4G16350	3	{'disease_resistance', 'salt_resistance', 'drought_resistance'}	calcineurin B-like protein 6 [Source:NCBI gene (formerly Entrezgene);Acc:827330]	4:9242274-9243912	Arabidopsis thaliana	known
AT4G16750	2	{'salt_resistance', 'drought_resistance'}	Integrase-type DNA-binding superfamily protein [Source:NCBI gene (formerly Entrezgene);Acc:827379]	4:9420651-9421857	Arabidopsis thaliana	known
AT4G16830	2	{'salt_resistance', 'drought_resistance'}	Hyaluronan / mRNA binding family [Source:NCBI gene (formerly Entrezgene);Acc:827389]	4:9470370-9472594	Arabidopsis thaliana	known
AT4G17490	3	{'disease_resistance', 'salt_resistance', 'drought_resistance'}	ethylene responsive element binding factor 6 [Source:NCBI gene (formerly Entrezgene);Acc:827463]	4:9752824-9754161	Arabidopsis thaliana	known
AT4G17500	3	{'disease_resistance', 'salt_resistance', 'drought_resistance'}	ethylene responsive element binding factor 1 [Source:NCBI gene (formerly Entrezgene);Acc:827464]	4:9759203-9760391	Arabidopsis thaliana	known
AT4G17520	2	{'salt_resistance', 'drought_resistance'}	Hyaluronan / mRNA binding family [Source:NCBI gene (formerly Entrezgene);Acc:827467]	4:9771297-9773592	Arabidopsis thaliana	known
AT4G17615	3	{'disease_resistance', 'salt_resistance', 'drought_resistance'}	calcineurin B-like protein 1 [Source:NCBI gene (formerly Entrezgene);Acc:827481]	4:9816278-9819368	Arabidopsis thaliana	known
AT4G17785	4	{'disease_resistance', 'salt_resistance', 'insect_resistance', 'drought_resistance'}	myb domain protein 39 [Source:NCBI gene (formerly Entrezgene);Acc:827500]	4:9881599-9883432	Arabidopsis thaliana	known
AT4G17870	2	{'salt_resistance', 'drought_resistance'}	Polyketide cyclase/dehydrase and lipid transport superfamily protein [Source:NCBI gene (formerly Entrezgene);Acc:827510]	4:9928587-9929875	Arabidopsis thaliana	known
AT4G17980	2	{'salt_resistance', 'drought_resistance'}	NAC domain containing protein 71 [Source:NCBI gene (formerly Entrezgene);Acc:827523]	4:9978703-9980555	Arabidopsis thaliana	known
AT4G18290	2	{'salt_resistance', 'insect_resistance'}	potassium channel KAT1-like protein [Source:NCBI gene (formerly Entrezgene);Acc:827555]	4:10114794-10118652	Arabidopsis thaliana	known
AT4G18350	3	{'disease_resistance', 'salt_resistance', 'drought_resistance'}	nine-cis-epoxycarotenoid dioxygenase 2 [Source:NCBI gene (formerly Entrezgene);Acc:827562]	4:10142255-10144646	Arabidopsis thaliana	known
AT4G18450	2	{'disease_resistance', 'drought_resistance'}	Integrase-type DNA-binding superfamily protein [Source:NCBI gene (formerly Entrezgene);Acc:827576]	4:10190231-10191252	Arabidopsis thaliana	known
AT4G18620	2	{'salt_resistance', 'drought_resistance'}	PYR1-like 13 [Source:NCBI gene (formerly Entrezgene);Acc:827596]	4:10254359-10254853	Arabidopsis thaliana	known
AT4G18700	3	{'disease_resistance', 'salt_resistance', 'drought_resistance'}	CBL-interacting protein kinase 12 [Source:NCBI gene (formerly Entrezgene);Acc:827604]	4:10288798-10291058	Arabidopsis thaliana	known
AT4G18710	3	{'disease_resistance', 'salt_resistance', 'drought_resistance'}	Protein kinase superfamily protein [Source:NCBI gene (formerly Entrezgene);Acc:827605]	4:10296138-10301228	Arabidopsis thaliana	known
AT4G18770	2	{'salt_resistance', 'drought_resistance'}	myb domain protein 98 [Source:NCBI gene (formerly Entrezgene);Acc:827611]	4:10311030-10313104	Arabidopsis thaliana	known
AT4G18780	3	{'disease_resistance', 'salt_resistance', 'drought_resistance'}	cellulose synthase family protein [Source:NCBI gene (formerly Entrezgene);Acc:827612]	4:10312624-10316886	Arabidopsis thaliana	known
AT4G18960	2	{'disease_resistance', 'plant_height_reduce'}	K-box region and MADS-box transcription factor family protein [Source:NCBI gene (formerly Entrezgene);Acc:827631]	4:10382856-10388539	Arabidopsis thaliana	known
AT4G18970	3	{'disease_resistance', 'salt_resistance', 'drought_resistance'}	GDSL-like Lipase/Acylhydrolase superfamily protein [Source:NCBI gene (formerly Entrezgene);Acc:827632]	4:10388722-10391298	Arabidopsis thaliana	known
AT4G19110	3	{'disease_resistance', 'salt_resistance', 'drought_resistance'}	Protein kinase superfamily protein [Source:NCBI gene (formerly Entrezgene);Acc:827649]	4:10454497-10459328	Arabidopsis thaliana	known
AT4G19170	3	{'disease_resistance', 'salt_resistance', 'drought_resistance'}	nine-cis-epoxycarotenoid dioxygenase 4 [Source:NCBI gene (formerly Entrezgene);Acc:827655]	4:10481619-10483879	Arabidopsis thaliana	known
AT4G19230	2	{'salt_resistance', 'drought_resistance'}	cytochrome P450, family 707, subfamily A, polypeptide 1 [Source:NCBI gene (formerly Entrezgene);Acc:827663]	4:10521259-10523961	Arabidopsis thaliana	known
AT4G19660	2	{'disease_resistance', 'insect_resistance'}	NPR1-like protein 4 [Source:NCBI gene (formerly Entrezgene);Acc:827710]	4:10696266-10698811	Arabidopsis thaliana	known
AT4G20140	3	{'disease_resistance', 'plant_height_reduce', 'insect_resistance'}	Leucine-rich repeat transmembrane protein kinase [Source:NCBI gene (formerly Entrezgene);Acc:827760]	4:10883921-10888270	Arabidopsis thaliana	known
AT4G20450	2	{'disease_resistance', 'drought_resistance'}	Leucine-rich repeat protein kinase family protein [Source:NCBI gene (formerly Entrezgene);Acc:827793]	4:11023918-11029090	Arabidopsis thaliana	known
AT4G21230	3	{'disease_resistance', 'salt_resistance', 'drought_resistance'}	cysteine-rich RLK (RECEPTOR-like protein kinase) 27 [Source:NCBI gene (formerly Entrezgene);Acc:827872]	4:11319139-11321679	Arabidopsis thaliana	known
AT4G21380	3	{'disease_resistance', 'salt_resistance', 'drought_resistance'}	receptor kinase 3 [Source:NCBI gene (formerly Entrezgene);Acc:827890]	4:11388827-11393226	Arabidopsis thaliana	known
AT4G21390	3	{'disease_resistance', 'salt_resistance', 'drought_resistance'}	S-locus lectin protein kinase family protein [Source:NCBI gene (formerly Entrezgene);Acc:827891]	4:11394295-11397726	Arabidopsis thaliana	known
AT4G21400	3	{'disease_resistance', 'salt_resistance', 'drought_resistance'}	cysteine-rich RLK (RECEPTOR-like protein kinase) 28 [Source:NCBI gene (formerly Entrezgene);Acc:827892]	4:11398857-11402180	Arabidopsis thaliana	known
AT4G21410	3	{'disease_resistance', 'salt_resistance', 'drought_resistance'}	cysteine-rich RLK (RECEPTOR-like protein kinase) 29 [Source:NCBI gene (formerly Entrezgene);Acc:827893]	4:11401711-11405235	Arabidopsis thaliana	known
AT4G21440	4	{'disease_resistance', 'salt_resistance', 'insect_resistance', 'drought_resistance'}	MYB-like 102 [Source:NCBI gene (formerly Entrezgene);Acc:826916]	4:11418199-11419769	Arabidopsis thaliana	known
AT4G21760	2	{'disease_resistance', 'salt_resistance'}	beta-glucosidase 47 [Source:NCBI gene (formerly Entrezgene);Acc:828264]	4:11561123-11563950	Arabidopsis thaliana	known
AT4G21940	2	{'disease_resistance', 'salt_resistance'}	calcium-dependent protein kinase 15 [Source:NCBI gene (formerly Entrezgene);Acc:828283]	4:11640735-11643762	Arabidopsis thaliana	known
AT4G22100	2	{'disease_resistance', 'salt_resistance'}	beta glucosidase 2 [Source:NCBI gene (formerly Entrezgene);Acc:828299]	4:11707370-11709932	Arabidopsis thaliana	known
AT4G22110	2	{'disease_resistance', 'salt_resistance'}	GroES-like zinc-binding dehydrogenase family protein [Source:NCBI gene (formerly Entrezgene);Acc:828300]	4:11711314-11714228	Arabidopsis thaliana	known
AT4G22200	2	{'salt_resistance', 'insect_resistance'}	potassium transport 2/3 [Source:NCBI gene (formerly Entrezgene);Acc:828311]	4:11746490-11750698	Arabidopsis thaliana	known
AT4G22330	2	{'disease_resistance', 'salt_resistance'}	Alkaline phytoceramidase (aPHC) [Source:NCBI gene (formerly Entrezgene);Acc:828328]	4:11797548-11799946	Arabidopsis thaliana	known
AT4G22680	4	{'disease_resistance', 'salt_resistance', 'insect_resistance', 'drought_resistance'}	myb domain protein 85 [Source:NCBI gene (formerly Entrezgene);Acc:828364]	4:11922340-11924230	Arabidopsis thaliana	known
AT4G22750	2	{'disease_resistance', 'drought_resistance'}	DHHC-type zinc finger protein [Source:NCBI gene (formerly Entrezgene);Acc:828372]	4:11949180-11951424	Arabidopsis thaliana	known
AT4G22755	2	{'disease_resistance', 'drought_resistance'}	methylsterol monooxygenase 1-3 [Source:NCBI gene (formerly Entrezgene);Acc:28720173]	4:11951830-11953731	Arabidopsis thaliana	known
AT4G22756	2	{'disease_resistance', 'drought_resistance'}	sterol C4-methyl oxidase 1-2 [Source:NCBI gene (formerly Entrezgene);Acc:828374]	4:11954840-11956918	Arabidopsis thaliana	known
AT4G22950	2	{'disease_resistance', 'plant_height_reduce'}	AGAMOUS-like 19 [Source:NCBI gene (formerly Entrezgene);Acc:828394]	4:12023824-12028004	Arabidopsis thaliana	known
AT4G23030	2	{'disease_resistance', 'drought_resistance'}	MATE efflux family protein [Source:NCBI gene (formerly Entrezgene);Acc:828402]	4:12072760-12074580	Arabidopsis thaliana	known
AT4G23050	2	{'disease_resistance', 'drought_resistance'}	PAS domain-containing protein tyrosine kinase family protein [Source:NCBI gene (formerly Entrezgene);Acc:828404]	4:12079859-12084362	Arabidopsis thaliana	known
AT4G23100	3	{'disease_resistance', 'salt_resistance', 'insect_resistance'}	glutamate-cysteine ligase [Source:NCBI gene (formerly Entrezgene);Acc:828409]	4:12102135-12107695	Arabidopsis thaliana	known
AT4G23130	3	{'disease_resistance', 'salt_resistance', 'drought_resistance'}	cysteine-rich RLK (RECEPTOR-like protein kinase) 5 [Source:NCBI gene (formerly Entrezgene);Acc:828412]	4:12117491-12120220	Arabidopsis thaliana	known
AT4G23140	3	{'disease_resistance', 'salt_resistance', 'drought_resistance'}	cysteine-rich RLK (RECEPTOR-like protein kinase) 6 [Source:NCBI gene (formerly Entrezgene);Acc:828413]	4:12121369-12124564	Arabidopsis thaliana	known
AT4G23150	3	{'disease_resistance', 'salt_resistance', 'drought_resistance'}	cysteine-rich RLK (RECEPTOR-like protein kinase) 7 [Source:NCBI gene (formerly Entrezgene);Acc:828414]	4:12125664-12128490	Arabidopsis thaliana	known
AT4G23160	3	{'disease_resistance', 'salt_resistance', 'drought_resistance'}	cysteine-rich RECEPTOR-like kinase [Source:NCBI gene (formerly Entrezgene);Acc:828415]	4:12129485-12134209	Arabidopsis thaliana	known
AT4G23180	3	{'disease_resistance', 'salt_resistance', 'drought_resistance'}	cysteine-rich RLK (RECEPTOR-like protein kinase) 10 [Source:NCBI gene (formerly Entrezgene);Acc:828417]	4:12137995-12140930	Arabidopsis thaliana	known
AT4G23190	3	{'disease_resistance', 'salt_resistance', 'drought_resistance'}	cysteine-rich RLK (RECEPTOR-like protein kinase) 11 [Source:NCBI gene (formerly Entrezgene);Acc:828418]	4:12140899-12143858	Arabidopsis thaliana	known
AT4G23200	3	{'disease_resistance', 'salt_resistance', 'drought_resistance'}	cysteine-rich RLK (RECEPTOR-like protein kinase) 12 [Source:NCBI gene (formerly Entrezgene);Acc:828419]	4:12145035-12148041	Arabidopsis thaliana	known
AT4G23210	3	{'disease_resistance', 'salt_resistance', 'drought_resistance'}	cysteine-rich RLK (RECEPTOR-like protein kinase) 13 [Source:NCBI gene (formerly Entrezgene);Acc:828420]	4:12148673-12151638	Arabidopsis thaliana	known
AT4G23220	3	{'disease_resistance', 'salt_resistance', 'drought_resistance'}	cysteine-rich RECEPTOR-like kinase [Source:NCBI gene (formerly Entrezgene);Acc:828421]	4:12154091-12156881	Arabidopsis thaliana	known
AT4G23230	3	{'disease_resistance', 'salt_resistance', 'drought_resistance'}	cysteine-rich RECEPTOR-like kinase [Source:NCBI gene (formerly Entrezgene);Acc:828422]	4:12157827-12160279	Arabidopsis thaliana	known
AT4G23240	3	{'disease_resistance', 'salt_resistance', 'drought_resistance'}	cysteine-rich RLK (RECEPTOR-like protein kinase) 16 [Source:NCBI gene (formerly Entrezgene);Acc:828423]	4:12160478-12163193	Arabidopsis thaliana	known
AT4G23250	3	{'disease_resistance', 'salt_resistance', 'drought_resistance'}	cysteine-rich receptor-like protein kinase 17 [Source:NCBI gene (formerly Entrezgene);Acc:828424]	4:12162004-12167026	Arabidopsis thaliana	known
AT4G23260	3	{'disease_resistance', 'salt_resistance', 'drought_resistance'}	cysteine-rich RLK (RECEPTOR-like protein kinase) 18 [Source:NCBI gene (formerly Entrezgene);Acc:828425]	4:12167416-12170080	Arabidopsis thaliana	known
AT4G23270	3	{'disease_resistance', 'salt_resistance', 'drought_resistance'}	cysteine-rich RLK (RECEPTOR-like protein kinase) 19 [Source:NCBI gene (formerly Entrezgene);Acc:828426]	4:12170955-12174297	Arabidopsis thaliana	known
AT4G23280	3	{'disease_resistance', 'salt_resistance', 'drought_resistance'}	cysteine-rich RLK (RECEPTOR-like protein kinase) 20 [Source:NCBI gene (formerly Entrezgene);Acc:828427]	4:12174733-12177576	Arabidopsis thaliana	known
AT4G23290	3	{'disease_resistance', 'salt_resistance', 'drought_resistance'}	cysteine-rich RLK (RECEPTOR-like protein kinase) 21 [Source:NCBI gene (formerly Entrezgene);Acc:828428]	4:12177734-12180936	Arabidopsis thaliana	known
AT4G23300	3	{'disease_resistance', 'salt_resistance', 'drought_resistance'}	cysteine-rich RLK (RECEPTOR-like protein kinase) 22 [Source:NCBI gene (formerly Entrezgene);Acc:828429]	4:12181625-12184774	Arabidopsis thaliana	known
AT4G23310	3	{'disease_resistance', 'salt_resistance', 'drought_resistance'}	cysteine-rich RLK (RECEPTOR-like protein kinase) 23 [Source:NCBI gene (formerly Entrezgene);Acc:828430]	4:12185369-12188961	Arabidopsis thaliana	known
AT4G23320	3	{'disease_resistance', 'salt_resistance', 'drought_resistance'}	cysteine-rich RLK (RECEPTOR-like protein kinase) 24 [Source:NCBI gene (formerly Entrezgene);Acc:828431]	4:12189089-12191704	Arabidopsis thaliana	known
AT4G23520	3	{'disease_resistance', 'salt_resistance', 'drought_resistance'}	Cysteine proteinases superfamily protein [Source:NCBI gene (formerly Entrezgene);Acc:828452]	4:12274315-12276322	Arabidopsis thaliana	known
AT4G23650	2	{'disease_resistance', 'salt_resistance'}	calcium-dependent protein kinase 6 [Source:NCBI gene (formerly Entrezgene);Acc:828465]	4:12324758-12327651	Arabidopsis thaliana	known
AT4G23750	2	{'salt_resistance', 'drought_resistance'}	cytokinin response factor 2 [Source:NCBI gene (formerly Entrezgene);Acc:828475]	4:12376122-12378032	Arabidopsis thaliana	known
AT4G23810	4	{'disease_resistance', 'salt_resistance', 'insect_resistance', 'drought_resistance'}	WRKY family transcription factor [Source:NCBI gene (formerly Entrezgene);Acc:828481]	4:12392370-12393982	Arabidopsis thaliana	known
AT4G24150	3	{'disease_resistance', 'grain_weight_increase', 'plant_height_reduce'}	growth-regulating factor 8 [Source:NCBI gene (formerly Entrezgene);Acc:828515]	4:12535972-12539576	Arabidopsis thaliana	known
AT4G24190	2	{'disease_resistance', 'salt_resistance'}	Chaperone protein htpG family protein [Source:NCBI gene (formerly Entrezgene);Acc:828520]	4:12551552-12556058	Arabidopsis thaliana	known
AT4G24400	3	{'disease_resistance', 'salt_resistance', 'drought_resistance'}	CBL-interacting protein kinase 8 [Source:NCBI gene (formerly Entrezgene);Acc:828542]	4:12616979-12620714	Arabidopsis thaliana	known
AT4G24480	2	{'disease_resistance', 'drought_resistance'}	Protein kinase superfamily protein [Source:NCBI gene (formerly Entrezgene);Acc:828550]	4:12649985-12655097	Arabidopsis thaliana	known
AT4G25470	2	{'salt_resistance', 'drought_resistance'}	C-repeat/DRE binding factor 2 [Source:NCBI gene (formerly Entrezgene);Acc:828651]	4:13015250-13016235	Arabidopsis thaliana	known
AT4G25480	2	{'salt_resistance', 'drought_resistance'}	dehydration response element B1A [Source:NCBI gene (formerly Entrezgene);Acc:828652]	4:13018010-13019400	Arabidopsis thaliana	known
AT4G25490	2	{'salt_resistance', 'drought_resistance'}	C-repeat/DRE binding factor 1 [Source:NCBI gene (formerly Entrezgene);Acc:828653]	4:13021780-13022996	Arabidopsis thaliana	known
AT4G25590	2	{'disease_resistance', 'insect_resistance'}	actin depolymerizing factor 7 [Source:NCBI gene (formerly Entrezgene);Acc:828664]	4:13058936-13060250	Arabidopsis thaliana	known
AT4G25800	2	{'disease_resistance', 'drought_resistance'}				known
AT4G26070	3	{'disease_resistance', 'salt_resistance', 'drought_resistance'}	MAP kinase/ ERK kinase 1 [Source:NCBI gene (formerly Entrezgene);Acc:828713]	4:13217475-13219936	Arabidopsis thaliana	known
AT4G26080	3	{'disease_resistance', 'salt_resistance', 'drought_resistance'}	Protein phosphatase 2C family protein [Source:NCBI gene (formerly Entrezgene);Acc:828714]	4:13219915-13222376	Arabidopsis thaliana	known
AT4G26110	2	{'disease_resistance', 'salt_resistance'}	nucleosome assembly protein1;1 [Source:NCBI gene (formerly Entrezgene);Acc:828717]	4:13232545-13235908	Arabidopsis thaliana	known
AT4G26120	3	{'disease_resistance', 'salt_resistance', 'insect_resistance'}	Ankyrin repeat family protein / BTB/POZ domain-containing protein [Source:NCBI gene (formerly Entrezgene);Acc:828718]	4:13236253-13238818	Arabidopsis thaliana	known
AT4G26540	2	{'plant_height_reduce', 'insect_resistance'}	Leucine-rich repeat receptor-like protein kinase family protein [Source:NCBI gene (formerly Entrezgene);Acc:828760]	4:13394447-13398307	Arabidopsis thaliana	known
AT4G26560	3	{'disease_resistance', 'salt_resistance', 'drought_resistance'}	calcineurin B-like protein 7 [Source:NCBI gene (formerly Entrezgene);Acc:828763]	4:13406733-13408087	Arabidopsis thaliana	known
AT4G26570	3	{'disease_resistance', 'salt_resistance', 'drought_resistance'}	calcineurin B-like 3 [Source:NCBI gene (formerly Entrezgene);Acc:828764]	4:13408383-13411177	Arabidopsis thaliana	known
AT4G27290	3	{'disease_resistance', 'salt_resistance', 'drought_resistance'}	S-locus lectin protein kinase family protein [Source:NCBI gene (formerly Entrezgene);Acc:828837]	4:13666076-13669202	Arabidopsis thaliana	known
AT4G27300	3	{'disease_resistance', 'salt_resistance', 'drought_resistance'}	S-locus lectin protein kinase family protein [Source:NCBI gene (formerly Entrezgene);Acc:828838]	4:13668676-13672413	Arabidopsis thaliana	known
AT4G27410	4	{'disease_resistance', 'grain_weight_increase', 'salt_resistance', 'drought_resistance'}	NAC (No Apical Meristem) domain transcriptional regulator superfamily protein [Source:NCBI gene (formerly Entrezgene);Acc:828849]	4:13707192-13709170	Arabidopsis thaliana	known
AT4G27820	2	{'disease_resistance', 'salt_resistance'}	beta glucosidase 9 [Source:NCBI gene (formerly Entrezgene);Acc:828895]	4:13857650-13860745	Arabidopsis thaliana	known
AT4G27830	2	{'disease_resistance', 'salt_resistance'}	beta glucosidase 10 [Source:NCBI gene (formerly Entrezgene);Acc:828896]	4:13861649-13864659	Arabidopsis thaliana	known
AT4G27920	2	{'salt_resistance', 'drought_resistance'}	PYR1-like 10 [Source:NCBI gene (formerly Entrezgene);Acc:828905]	4:13901142-13902000	Arabidopsis thaliana	known
AT4G27950	3	{'disease_resistance', 'salt_resistance', 'drought_resistance'}	cytokinin response factor 4 [Source:NCBI gene (formerly Entrezgene);Acc:828908]	4:13909542-13910995	Arabidopsis thaliana	known
AT4G27970	2	{'salt_resistance', 'drought_resistance'}	SLAC1 homologue 2 [Source:NCBI gene (formerly Entrezgene);Acc:828910]	4:13918165-13920378	Arabidopsis thaliana	known
AT4G28110	4	{'disease_resistance', 'salt_resistance', 'insect_resistance', 'drought_resistance'}	myb domain protein 41 [Source:NCBI gene (formerly Entrezgene);Acc:828927]	4:13968029-13969525	Arabidopsis thaliana	known
AT4G28350	2	{'salt_resistance', 'plant_height_reduce'}	Concanavalin A-like lectin protein kinase family protein [Source:NCBI gene (formerly Entrezgene);Acc:828950]	4:14026577-14028622	Arabidopsis thaliana	known
AT4G28490	2	{'disease_resistance', 'plant_height_reduce'}	Leucine-rich receptor-like protein kinase family protein [Source:NCBI gene (formerly Entrezgene);Acc:828967]	4:14077676-14081457	Arabidopsis thaliana	known
AT4G29050	3	{'disease_resistance', 'salt_resistance', 'plant_height_reduce'}	Concanavalin A-like lectin protein kinase family protein [Source:NCBI gene (formerly Entrezgene);Acc:829026]	4:14314657-14317022	Arabidopsis thaliana	known
AT4G29140	2	{'disease_resistance', 'drought_resistance'}	MATE efflux family protein [Source:NCBI gene (formerly Entrezgene);Acc:829035]	4:14368877-14371195	Arabidopsis thaliana	known
AT4G29810	3	{'disease_resistance', 'salt_resistance', 'drought_resistance'}	MAP kinase kinase 2 [Source:NCBI gene (formerly Entrezgene);Acc:829103]	4:14592963-14595384	Arabidopsis thaliana	known
AT4G30360	2	{'disease_resistance', 'salt_resistance'}	cyclic nucleotide-gated channel 17 [Source:NCBI gene (formerly Entrezgene);Acc:829159]	4:14854694-14858019	Arabidopsis thaliana	known
AT4G30520	2	{'disease_resistance', 'grain_weight_increase'}	Leucine-rich repeat protein kinase family protein [Source:NCBI gene (formerly Entrezgene);Acc:829175]	4:14907942-14911446	Arabidopsis thaliana	known
AT4G30560	2	{'disease_resistance', 'salt_resistance'}	cyclic nucleotide gated channel 9 [Source:NCBI gene (formerly Entrezgene);Acc:829179]	4:14926834-14930355	Arabidopsis thaliana	known
AT4G30570	2	{'disease_resistance', 'salt_resistance'}	Glucose-1-phosphate adenylyltransferase family protein [Source:NCBI gene (formerly Entrezgene);Acc:829180]	4:14930599-14932021	Arabidopsis thaliana	known
AT4G30960	3	{'disease_resistance', 'salt_resistance', 'drought_resistance'}	SOS3-interacting protein 3 [Source:NCBI gene (formerly Entrezgene);Acc:829221]	4:15067028-15069183	Arabidopsis thaliana	known
AT4G31000	2	{'disease_resistance', 'drought_resistance'}	Calmodulin-binding protein [Source:NCBI gene (formerly Entrezgene);Acc:829227]	4:15103120-15105979	Arabidopsis thaliana	known
AT4G31750	3	{'disease_resistance', 'salt_resistance', 'drought_resistance'}	HOPW1-1-interacting 2 [Source:NCBI gene (formerly Entrezgene);Acc:829303]	4:15363708-15367892	Arabidopsis thaliana	known
AT4G31800	3	{'disease_resistance', 'salt_resistance', 'drought_resistance'}	WRKY DNA-binding protein 18 [Source:NCBI gene (formerly Entrezgene);Acc:829308]	4:15382777-15385100	Arabidopsis thaliana	known
AT4G31940	2	{'disease_resistance', 'insect_resistance'}	cytochrome P450, family 82, subfamily C, polypeptide 4 [Source:NCBI gene (formerly Entrezgene);Acc:829324]	4:15451988-15454224	Arabidopsis thaliana	known
AT4G31950	2	{'disease_resistance', 'insect_resistance'}	cytochrome P450, family 82, subfamily C, polypeptide 3 [Source:NCBI gene (formerly Entrezgene);Acc:829325]	4:15455083-15457121	Arabidopsis thaliana	known
AT4G31970	2	{'disease_resistance', 'insect_resistance'}	cytochrome P450, family 82, subfamily C, polypeptide 2 [Source:NCBI gene (formerly Entrezgene);Acc:829327]	4:15462350-15464563	Arabidopsis thaliana	known
AT4G32410	3	{'disease_resistance', 'salt_resistance', 'drought_resistance'}	cellulose synthase 1 [Source:NCBI gene (formerly Entrezgene);Acc:829376]	4:15640490-15646844	Arabidopsis thaliana	known
AT4G32500	2	{'salt_resistance', 'insect_resistance'}	K+ transporter 5 [Source:NCBI gene (formerly Entrezgene);Acc:829385]	4:15681017-15685339	Arabidopsis thaliana	known
AT4G32650	2	{'salt_resistance', 'insect_resistance'}	potassium channel protein [Source:NCBI gene (formerly Entrezgene);Acc:829400]	4:15751271-15755047	Arabidopsis thaliana	known
AT4G32800	2	{'salt_resistance', 'drought_resistance'}	Integrase-type DNA-binding superfamily protein [Source:NCBI gene (formerly Entrezgene);Acc:829416]	4:15819489-15820879	Arabidopsis thaliana	known
AT4G32880	2	{'disease_resistance', 'drought_resistance'}	homeobox-leucine zipper protein ATHB-8 [Source:NCBI gene (formerly Entrezgene);Acc:829424]	4:15863339-15868650	Arabidopsis thaliana	known
AT4G33000	3	{'disease_resistance', 'salt_resistance', 'drought_resistance'}	calcineurin B-like protein 10 [Source:NCBI gene (formerly Entrezgene);Acc:829437]	4:15924349-15926665	Arabidopsis thaliana	known
AT4G33430	2	{'disease_resistance', 'grain_weight_increase'}	BRI1-associated receptor kinase [Source:NCBI gene (formerly Entrezgene);Acc:829480]	4:16086311-16090832	Arabidopsis thaliana	known
AT4G33450	2	{'salt_resistance', 'drought_resistance'}	myb domain protein 69 [Source:NCBI gene (formerly Entrezgene);Acc:829482]	4:16095392-16096774	Arabidopsis thaliana	known
AT4G33950	3	{'disease_resistance', 'salt_resistance', 'drought_resistance'}	Protein kinase superfamily protein [Source:NCBI gene (formerly Entrezgene);Acc:829541]	4:16271745-16274825	Arabidopsis thaliana	known
AT4G34000	2	{'salt_resistance', 'drought_resistance'}	abscisic acid responsive elements-binding factor 3 [Source:NCBI gene (formerly Entrezgene);Acc:829547]	4:16295334-16298285	Arabidopsis thaliana	known
AT4G34970	2	{'disease_resistance', 'insect_resistance'}	actin depolymerizing factor 9 [Source:NCBI gene (formerly Entrezgene);Acc:829649]	4:16653704-16654955	Arabidopsis thaliana	known
AT4G34990	3	{'salt_resistance', 'insect_resistance', 'drought_resistance'}	myb domain protein 32 [Source:NCBI gene (formerly Entrezgene);Acc:829651]	4:16661101-16662549	Arabidopsis thaliana	known
AT4G35090	2	{'salt_resistance', 'drought_resistance'}	catalase 2 [Source:NCBI gene (formerly Entrezgene);Acc:829661]	4:16700312-16703504	Arabidopsis thaliana	known
AT4G35310	2	{'disease_resistance', 'salt_resistance'}	calmodulin-domain protein kinase 5 [Source:NCBI gene (formerly Entrezgene);Acc:829685]	4:16801605-16805005	Arabidopsis thaliana	known
AT4G35350	3	{'disease_resistance', 'salt_resistance', 'drought_resistance'}	xylem cysteine peptidase 1 [Source:NCBI gene (formerly Entrezgene);Acc:829688]	4:16810482-16812077	Arabidopsis thaliana	known
AT4G35570	2	{'salt_resistance', 'drought_resistance'}	high mobility group B5 [Source:NCBI gene (formerly Entrezgene);Acc:829709]	4:16887131-16888371	Arabidopsis thaliana	known
AT4G35580	2	{'salt_resistance', 'drought_resistance'}	NAC transcription factor-like 9 [Source:NCBI gene (formerly Entrezgene);Acc:829710]	4:16888386-16890877	Arabidopsis thaliana	known
AT4G35780	2	{'disease_resistance', 'drought_resistance'}	ACT-like protein tyrosine kinase family protein [Source:NCBI gene (formerly Entrezgene);Acc:829731]	4:16946369-16950620	Arabidopsis thaliana	known
AT4G35790	2	{'salt_resistance', 'drought_resistance'}	phospholipase D delta [Source:NCBI gene (formerly Entrezgene);Acc:829733]	4:16955415-16960407	Arabidopsis thaliana	known
AT4G36070	2	{'disease_resistance', 'salt_resistance'}	calcium-dependent protein kinase 18 [Source:NCBI gene (formerly Entrezgene);Acc:829763]	4:17056587-17059706	Arabidopsis thaliana	known
AT4G36160	3	{'disease_resistance', 'salt_resistance', 'drought_resistance'}	NAC domain containing protein 76 [Source:NCBI gene (formerly Entrezgene);Acc:829773]	4:17110645-17114141	Arabidopsis thaliana	known
AT4G36380	2	{'disease_resistance', 'grain_weight_increase'}	Cytochrome P450 superfamily protein [Source:NCBI gene (formerly Entrezgene);Acc:829790]	4:17187528-17192507	Arabidopsis thaliana	known
AT4G36450	3	{'disease_resistance', 'salt_resistance', 'drought_resistance'}	mitogen-activated protein kinase 14 [Source:NCBI gene (formerly Entrezgene);Acc:829797]	4:17210049-17211782	Arabidopsis thaliana	known
AT4G36880	3	{'disease_resistance', 'salt_resistance', 'drought_resistance'}	cysteine proteinase1 [Source:NCBI gene (formerly Entrezgene);Acc:829841]	4:17374454-17376279	Arabidopsis thaliana	known
AT4G36900	2	{'salt_resistance', 'drought_resistance'}	related to AP2 10 [Source:NCBI gene (formerly Entrezgene);Acc:829843]	4:17388649-17389862	Arabidopsis thaliana	known
AT4G37260	2	{'salt_resistance', 'drought_resistance'}	myb domain protein 73 [Source:NCBI gene (formerly Entrezgene);Acc:829880]	4:17540490-17541799	Arabidopsis thaliana	known
AT4G37740	3	{'disease_resistance', 'grain_weight_increase', 'plant_height_reduce'}	growth-regulating factor 2 [Source:NCBI gene (formerly Entrezgene);Acc:829930]	4:17725337-17727909	Arabidopsis thaliana	known
AT4G37780	3	{'salt_resistance', 'insect_resistance', 'drought_resistance'}	myb domain protein 87 [Source:NCBI gene (formerly Entrezgene);Acc:829934]	4:17758232-17759746	Arabidopsis thaliana	known
AT4G37940	2	{'disease_resistance', 'plant_height_reduce'}	AGAMOUS-like 21 [Source:NCBI gene (formerly Entrezgene);Acc:829950]	4:17835217-17838969	Arabidopsis thaliana	known
AT4G38130	2	{'salt_resistance', 'drought_resistance'}	histone deacetylase 1 [Source:NCBI gene (formerly Entrezgene);Acc:829969]	4:17896278-17899509	Arabidopsis thaliana	known
AT4G38190	3	{'disease_resistance', 'salt_resistance', 'drought_resistance'}	cellulose synthase like D4 [Source:NCBI gene (formerly Entrezgene);Acc:829975]	4:17909832-17913790	Arabidopsis thaliana	known
AT4G38230	2	{'disease_resistance', 'salt_resistance'}	calcium-dependent protein kinase 26 [Source:NCBI gene (formerly Entrezgene);Acc:829980]	4:17928677-17931511	Arabidopsis thaliana	known
AT4G38470	2	{'disease_resistance', 'drought_resistance'}	ACT-like protein tyrosine kinase family protein [Source:NCBI gene (formerly Entrezgene);Acc:830003]	4:17998896-18003757	Arabidopsis thaliana	known
AT4G38620	4	{'disease_resistance', 'salt_resistance', 'insect_resistance', 'drought_resistance'}	myb domain protein 4 [Source:NCBI gene (formerly Entrezgene);Acc:830018]	4:18053360-18055040	Arabidopsis thaliana	known
AT4G38830	3	{'disease_resistance', 'salt_resistance', 'drought_resistance'}	cysteine-rich RLK (RECEPTOR-like protein kinase) 26 [Source:NCBI gene (formerly Entrezgene);Acc:830038]	4:18122175-18124943	Arabidopsis thaliana	known
AT4G39090	2	{'salt_resistance', 'drought_resistance'}	Papain family cysteine protease [Source:NCBI gene (formerly Entrezgene);Acc:830064]	4:18215542-18217616	Arabidopsis thaliana	known
AT4G39350	3	{'disease_resistance', 'salt_resistance', 'drought_resistance'}	cellulose synthase A2 [Source:NCBI gene (formerly Entrezgene);Acc:830090]	4:18296388-18302192	Arabidopsis thaliana	known
AT4G39400	2	{'disease_resistance', 'grain_weight_increase'}	Leucine-rich receptor-like protein kinase family protein [Source:NCBI gene (formerly Entrezgene);Acc:830095]	4:18324457-18328831	Arabidopsis thaliana	known
AT4G39780	3	{'disease_resistance', 'salt_resistance', 'drought_resistance'}	Integrase-type DNA-binding superfamily protein [Source:NCBI gene (formerly Entrezgene);Acc:830136]	4:18457906-18459257	Arabidopsis thaliana	known
AT4G40010	3	{'disease_resistance', 'salt_resistance', 'drought_resistance'}	SNF1-related protein kinase 2.7 [Source:NCBI gene (formerly Entrezgene);Acc:830162]	4:18548444-18551183	Arabidopsis thaliana	known
AT5G01410	2	{'salt_resistance', 'drought_resistance'}	Aldolase-type TIM barrel family protein [Source:NCBI gene (formerly Entrezgene);Acc:831738]	5:171889-173663	Arabidopsis thaliana	known
AT5G01540	2	{'salt_resistance', 'plant_height_reduce'}	lectin receptor kinase a4.1 [Source:NCBI gene (formerly Entrezgene);Acc:831722]	5:210979-213472	Arabidopsis thaliana	known
AT5G01550	2	{'salt_resistance', 'plant_height_reduce'}	lectin receptor kinase a4.1 [Source:NCBI gene (formerly Entrezgene);Acc:831700]	5:214373-216773	Arabidopsis thaliana	known
AT5G01560	2	{'salt_resistance', 'plant_height_reduce'}	lectin receptor kinase a4.3 [Source:NCBI gene (formerly Entrezgene);Acc:830345]	5:218029-221198	Arabidopsis thaliana	known
AT5G01810	3	{'disease_resistance', 'salt_resistance', 'drought_resistance'}	CBL-interacting protein kinase 15 [Source:NCBI gene (formerly Entrezgene);Acc:830556]	5:309374-312097	Arabidopsis thaliana	known
AT5G01820	3	{'disease_resistance', 'salt_resistance', 'drought_resistance'}	serine/threonine protein kinase 1 [Source:NCBI gene (formerly Entrezgene);Acc:831765]	5:313190-315405	Arabidopsis thaliana	known
AT5G02070	3	{'disease_resistance', 'salt_resistance', 'drought_resistance'}	Protein kinase family protein [Source:NCBI gene (formerly Entrezgene);Acc:831776]	5:405895-408220	Arabidopsis thaliana	known
AT5G02320	2	{'salt_resistance', 'drought_resistance'}	myb domain protein 3r-5 [Source:NCBI gene (formerly Entrezgene);Acc:831802]	5:482793-486473	Arabidopsis thaliana	known
AT5G02800	2	{'disease_resistance', 'grain_weight_increase'}	Protein kinase superfamily protein [Source:NCBI gene (formerly Entrezgene);Acc:831285]	5:635207-637568	Arabidopsis thaliana	known
AT5G03140	3	{'disease_resistance', 'salt_resistance', 'plant_height_reduce'}	Concanavalin A-like lectin protein kinase family protein [Source:NCBI gene (formerly Entrezgene);Acc:831590]	5:737468-740319	Arabidopsis thaliana	known
AT5G03280	2	{'grain_weight_increase', 'salt_resistance'}	NRAMP metal ion transporter family protein [Source:NCBI gene (formerly Entrezgene);Acc:831889]	5:787428-793404	Arabidopsis thaliana	known
AT5G03730	2	{'disease_resistance', 'drought_resistance'}	Protein kinase superfamily protein [Source:NCBI gene (formerly Entrezgene);Acc:831748]	5:974360-979849	Arabidopsis thaliana	known
AT5G04410	2	{'salt_resistance', 'drought_resistance'}	NAC domain containing protein 2 [Source:NCBI gene (formerly Entrezgene);Acc:830320]	5:1243684-1246684	Arabidopsis thaliana	known
AT5G04870	2	{'disease_resistance', 'salt_resistance'}	calcium dependent protein kinase 1 [Source:NCBI gene (formerly Entrezgene);Acc:830366]	5:1416564-1420554	Arabidopsis thaliana	known
AT5G05150	2	{'salt_resistance', 'drought_resistance'}	autophagy-related protein 18E [Source:NCBI gene (formerly Entrezgene);Acc:830397]	5:1524699-1526199	Arabidopsis thaliana	known
AT5G05170	3	{'disease_resistance', 'salt_resistance', 'drought_resistance'}	Cellulose synthase family protein [Source:NCBI gene (formerly Entrezgene);Acc:830399]	5:1530132-1535558	Arabidopsis thaliana	known
AT5G05410	2	{'salt_resistance', 'drought_resistance'}	DRE-binding protein 2A [Source:NCBI gene (formerly Entrezgene);Acc:830424]	5:1602205-1604112	Arabidopsis thaliana	known
AT5G05440	2	{'salt_resistance', 'drought_resistance'}	Polyketide cyclase/dehydrase and lipid transport superfamily protein [Source:NCBI gene (formerly Entrezgene);Acc:830427]	5:1608988-1610527	Arabidopsis thaliana	known
AT5G05600	2	{'salt_resistance', 'insect_resistance'}	2-oxoglutarate (2OG) and Fe(II)-dependent oxygenase superfamily protein [Source:NCBI gene (formerly Entrezgene);Acc:830443]	5:1672070-1674770	Arabidopsis thaliana	known
AT5G05680	2	{'disease_resistance', 'salt_resistance'}	nuclear pore complex protein-like protein [Source:NCBI gene (formerly Entrezgene);Acc:830452]	5:1698270-1702659	Arabidopsis thaliana	known
AT5G05690	2	{'disease_resistance', 'grain_weight_increase'}	Cytochrome P450 superfamily protein [Source:NCBI gene (formerly Entrezgene);Acc:830453]	5:1702640-1706948	Arabidopsis thaliana	known
AT5G06740	3	{'disease_resistance', 'salt_resistance', 'plant_height_reduce'}	Concanavalin A-like lectin protein kinase family protein [Source:NCBI gene (formerly Entrezgene);Acc:830563]	5:2083964-2086218	Arabidopsis thaliana	known
AT5G07070	3	{'disease_resistance', 'salt_resistance', 'drought_resistance'}	CBL-interacting protein kinase 2 [Source:NCBI gene (formerly Entrezgene);Acc:830598]	5:2196428-2198539	Arabidopsis thaliana	known
AT5G07280	3	{'disease_resistance', 'grain_weight_increase', 'insect_resistance'}	Leucine-rich repeat transmembrane protein kinase [Source:NCBI gene (formerly Entrezgene);Acc:830619]	5:2284830-2288855	Arabidopsis thaliana	known
AT5G07310	3	{'disease_resistance', 'salt_resistance', 'drought_resistance'}	Integrase-type DNA-binding superfamily protein [Source:NCBI gene (formerly Entrezgene);Acc:830622]	5:2305551-2306837	Arabidopsis thaliana	known
AT5G07580	3	{'disease_resistance', 'salt_resistance', 'drought_resistance'}	ethylene-responsive transcription factor [Source:NCBI gene (formerly Entrezgene);Acc:830651]	5:2399726-2400349	Arabidopsis thaliana	known
AT5G07680	3	{'disease_resistance', 'salt_resistance', 'drought_resistance'}	NAC domain containing protein 80 [Source:NCBI gene (formerly Entrezgene);Acc:830661]	5:2435795-2437661	Arabidopsis thaliana	known
AT5G07690	4	{'disease_resistance', 'salt_resistance', 'insect_resistance', 'drought_resistance'}	myb domain protein 29 [Source:NCBI gene (formerly Entrezgene);Acc:830662]	5:2446669-2448584	Arabidopsis thaliana	known
AT5G07700	3	{'salt_resistance', 'insect_resistance', 'drought_resistance'}	myb domain protein 76 [Source:NCBI gene (formerly Entrezgene);Acc:830663]	5:2450027-2451807	Arabidopsis thaliana	known
AT5G08590	3	{'disease_resistance', 'salt_resistance', 'drought_resistance'}	SNF1-related protein kinase 2.1 [Source:NCBI gene (formerly Entrezgene);Acc:830760]	5:2783168-2786113	Arabidopsis thaliana	known
AT5G08790	4	{'disease_resistance', 'grain_weight_increase', 'salt_resistance', 'drought_resistance'}	NAC (No Apical Meristem) domain transcriptional regulator superfamily protein [Source:NCBI gene (formerly Entrezgene);Acc:830779]	5:2858849-2860558	Arabidopsis thaliana	known
AT5G09330	2	{'salt_resistance', 'drought_resistance'}	NAC domain containing protein 82 [Source:NCBI gene (formerly Entrezgene);Acc:830792]	5:2892338-2895480	Arabidopsis thaliana	known
AT5G09410	2	{'salt_resistance', 'insect_resistance'}	ethylene induced calmodulin binding protein [Source:NCBI gene (formerly Entrezgene);Acc:830800]	5:2920827-2927480	Arabidopsis thaliana	known
AT5G09870	3	{'disease_resistance', 'salt_resistance', 'drought_resistance'}	cellulose synthase 5 [Source:NCBI gene (formerly Entrezgene);Acc:830847]	5:3072870-3078416	Arabidopsis thaliana	known
AT5G10120	2	{'disease_resistance', 'salt_resistance'}	Ethylene insensitive 3 family protein [Source:NCBI gene (formerly Entrezgene);Acc:830876]	5:3169640-3171262	Arabidopsis thaliana	known
AT5G10270	2	{'disease_resistance', 'salt_resistance'}	cyclin-dependent kinase C;1 [Source:NCBI gene (formerly Entrezgene);Acc:830891]	5:3221493-3224788	Arabidopsis thaliana	known
AT5G10280	4	{'disease_resistance', 'salt_resistance', 'insect_resistance', 'drought_resistance'}	myb domain protein 92 [Source:NCBI gene (formerly Entrezgene);Acc:830892]	5:3232569-3234277	Arabidopsis thaliana	known
AT5G10290	2	{'disease_resistance', 'grain_weight_increase'}	leucine-rich repeat transmembrane protein kinase family protein [Source:NCBI gene (formerly Entrezgene);Acc:830893]	5:3235258-3238808	Arabidopsis thaliana	known
AT5G10720	2	{'salt_resistance', 'drought_resistance'}	histidine kinase 5 [Source:NCBI gene (formerly Entrezgene);Acc:830938]	5:3385901-3390686	Arabidopsis thaliana	known
AT5G10740	3	{'disease_resistance', 'salt_resistance', 'drought_resistance'}	Protein phosphatase 2C family protein [Source:NCBI gene (formerly Entrezgene);Acc:830941]	5:3393465-3396200	Arabidopsis thaliana	known
AT5G10930	3	{'disease_resistance', 'salt_resistance', 'drought_resistance'}	CBL-interacting protein kinase 5 [Source:NCBI gene (formerly Entrezgene);Acc:830960]	5:3445029-3447278	Arabidopsis thaliana	known
AT5G11050	2	{'salt_resistance', 'drought_resistance'}	myb domain protein 64 [Source:NCBI gene (formerly Entrezgene);Acc:830972]	5:3502092-3503834	Arabidopsis thaliana	known
AT5G11270	2	{'disease_resistance', 'drought_resistance'}	overexpressor of cationic peroxidase 3 [Source:NCBI gene (formerly Entrezgene);Acc:830997]	5:3595274-3597237	Arabidopsis thaliana	known
AT5G11510	2	{'salt_resistance', 'drought_resistance'}	myb domain protein 3r-4 [Source:NCBI gene (formerly Entrezgene);Acc:831023]	5:3679748-3684884	Arabidopsis thaliana	known
AT5G11590	2	{'salt_resistance', 'drought_resistance'}	Integrase-type DNA-binding superfamily protein [Source:NCBI gene (formerly Entrezgene);Acc:831031]	5:3727453-3728726	Arabidopsis thaliana	known
AT5G11850	2	{'disease_resistance', 'drought_resistance'}	Protein kinase superfamily protein [Source:NCBI gene (formerly Entrezgene);Acc:831058]	5:3816080-3821170	Arabidopsis thaliana	known
AT5G12180	2	{'disease_resistance', 'salt_resistance'}	calcium-dependent protein kinase 17 [Source:NCBI gene (formerly Entrezgene);Acc:831091]	5:3936813-3939596	Arabidopsis thaliana	known
AT5G12480	2	{'disease_resistance', 'salt_resistance'}	calmodulin-domain protein kinase 7 [Source:NCBI gene (formerly Entrezgene);Acc:831123]	5:4047513-4050643	Arabidopsis thaliana	known
AT5G13180	2	{'plant_height_reduce', 'drought_resistance'}	NAC domain containing protein 83 [Source:NCBI gene (formerly Entrezgene);Acc:831157]	5:4196256-4197940	Arabidopsis thaliana	known
AT5G13320	3	{'disease_resistance', 'salt_resistance', 'drought_resistance'}	Auxin-responsive GH3 family protein [Source:NCBI gene (formerly Entrezgene);Acc:831173]	5:4267456-4271064	Arabidopsis thaliana	known
AT5G13330	3	{'disease_resistance', 'salt_resistance', 'drought_resistance'}	related to AP2 6l [Source:NCBI gene (formerly Entrezgene);Acc:831174]	5:4271730-4274674	Arabidopsis thaliana	known
AT5G13790	2	{'disease_resistance', 'plant_height_reduce'}	AGAMOUS-like 15 [Source:NCBI gene (formerly Entrezgene);Acc:831224]	5:4448862-4450958	Arabidopsis thaliana	known
AT5G13910	2	{'salt_resistance', 'drought_resistance'}	Integrase-type DNA-binding superfamily protein [Source:NCBI gene (formerly Entrezgene);Acc:831238]	5:4482128-4483247	Arabidopsis thaliana	known
AT5G14400	2	{'disease_resistance', 'grain_weight_increase'}	cytochrome P450, family 724, subfamily A, polypeptide 1 [Source:NCBI gene (formerly Entrezgene);Acc:831291]	5:4643510-4646530	Arabidopsis thaliana	known
AT5G14870	2	{'disease_resistance', 'salt_resistance'}	cyclic nucleotide-gated channel 18 [Source:NCBI gene (formerly Entrezgene);Acc:831339]	5:4808091-4811093	Arabidopsis thaliana	known
AT5G15310	3	{'salt_resistance', 'insect_resistance', 'drought_resistance'}	myb domain protein 16 [Source:NCBI gene (formerly Entrezgene);Acc:831383]	5:4974671-4976470	Arabidopsis thaliana	known
AT5G15410	2	{'disease_resistance', 'salt_resistance'}	Cyclic nucleotide-regulated ion channel family protein [Source:NCBI gene (formerly Entrezgene);Acc:831393]	5:5003226-5006882	Arabidopsis thaliana	known
AT5G15800	2	{'disease_resistance', 'plant_height_reduce'}	K-box region and MADS-box transcription factor family protein [Source:NCBI gene (formerly Entrezgene);Acc:831436]	5:5151334-5154253	Arabidopsis thaliana	known
AT5G16000	2	{'disease_resistance', 'grain_weight_increase'}	NSP-interacting kinase 1 [Source:NCBI gene (formerly Entrezgene);Acc:831457]	5:5223934-5227288	Arabidopsis thaliana	known
AT5G16570	2	{'grain_weight_increase', 'plant_height_reduce'}	glutamine synthetase 1;4 [Source:NCBI gene (formerly Entrezgene);Acc:831519]	5:5421589-5424749	Arabidopsis thaliana	known
AT5G16600	3	{'salt_resistance', 'insect_resistance', 'drought_resistance'}	myb domain protein 43 [Source:NCBI gene (formerly Entrezgene);Acc:831522]	5:5438165-5440433	Arabidopsis thaliana	known
AT5G16910	3	{'disease_resistance', 'salt_resistance', 'drought_resistance'}	cellulose-synthase like D2 [Source:NCBI gene (formerly Entrezgene);Acc:831554]	5:5560607-5565660	Arabidopsis thaliana	known
AT5G17230	2	{'disease_resistance', 'salt_resistance'}	PHYTOENE SYNTHASE [Source:NCBI gene (formerly Entrezgene);Acc:831587]	5:5659554-5662997	Arabidopsis thaliana	known
AT5G17260	3	{'disease_resistance', 'salt_resistance', 'drought_resistance'}	NAC domain containing protein 86 [Source:NCBI gene (formerly Entrezgene);Acc:831591]	5:5675184-5678175	Arabidopsis thaliana	known
AT5G17420	3	{'disease_resistance', 'salt_resistance', 'drought_resistance'}	Cellulose synthase family protein [Source:NCBI gene (formerly Entrezgene);Acc:831608]	5:5736630-5741500	Arabidopsis thaliana	known
AT5G17490	3	{'grain_weight_increase', 'salt_resistance', 'plant_height_reduce'}	RGA-like protein 3 [Source:NCBI gene (formerly Entrezgene);Acc:831615]	5:5763989-5766246	Arabidopsis thaliana	known
AT5G17800	2	{'salt_resistance', 'drought_resistance'}	myb domain protein 56 [Source:NCBI gene (formerly Entrezgene);Acc:831648]	5:5877113-5879331	Arabidopsis thaliana	known
AT5G18270	3	{'disease_resistance', 'salt_resistance', 'drought_resistance'}	NAC domain containing protein 87 [Source:NCBI gene (formerly Entrezgene);Acc:831945]	5:6040919-6043014	Arabidopsis thaliana	known
AT5G18450	2	{'salt_resistance', 'drought_resistance'}	Integrase-type DNA-binding superfamily protein [Source:NCBI gene (formerly Entrezgene);Acc:831963]	5:6116024-6117041	Arabidopsis thaliana	known
AT5G18560	2	{'salt_resistance', 'drought_resistance'}	Integrase-type DNA-binding superfamily protein [Source:NCBI gene (formerly Entrezgene);Acc:831974]	5:6164526-6166040	Arabidopsis thaliana	known
AT5G19010	3	{'disease_resistance', 'salt_resistance', 'drought_resistance'}	mitogen-activated protein kinase 16 [Source:NCBI gene (formerly Entrezgene);Acc:832019]	5:6344770-6348267	Arabidopsis thaliana	known
AT5G19360	2	{'disease_resistance', 'salt_resistance'}	calcium-dependent protein kinase 34 [Source:NCBI gene (formerly Entrezgene);Acc:832056]	5:6521405-6523954	Arabidopsis thaliana	known
AT5G19450	2	{'disease_resistance', 'salt_resistance'}	calcium-dependent protein kinase 19 [Source:NCBI gene (formerly Entrezgene);Acc:832065]	5:6558331-6562057	Arabidopsis thaliana	known
AT5G19700	2	{'disease_resistance', 'drought_resistance'}	MATE efflux family protein [Source:NCBI gene (formerly Entrezgene);Acc:832090]	5:6660678-6662463	Arabidopsis thaliana	known
AT5G21120	2	{'disease_resistance', 'salt_resistance'}	ETHYLENE-INSENSITIVE3-like 2 [Source:NCBI gene (formerly Entrezgene);Acc:832237]	5:7181926-7184365	Arabidopsis thaliana	known
AT5G21326	3	{'disease_resistance', 'salt_resistance', 'drought_resistance'}	Ca2+regulated serine-threonine protein kinase family protein [Source:NCBI gene (formerly Entrezgene);Acc:832246]	5:7217244-7222021	Arabidopsis thaliana	known
AT5G22290	2	{'salt_resistance', 'drought_resistance'}	NAC domain containing protein 89 [Source:NCBI gene (formerly Entrezgene);Acc:832289]	5:7375839-7377776	Arabidopsis thaliana	known
AT5G23000	3	{'salt_resistance', 'insect_resistance', 'drought_resistance'}	myb domain protein 37 [Source:NCBI gene (formerly Entrezgene);Acc:832364]	5:7696135-7698022	Arabidopsis thaliana	known
AT5G23580	2	{'disease_resistance', 'salt_resistance'}	calmodulin-like domain protein kinase 9 [Source:NCBI gene (formerly Entrezgene);Acc:832424]	5:7950202-7952619	Arabidopsis thaliana	known
AT5G24030	2	{'salt_resistance', 'drought_resistance'}	SLAC1 homologue 3 [Source:NCBI gene (formerly Entrezgene);Acc:832468]	5:8118317-8122914	Arabidopsis thaliana	known
AT5G24270	3	{'disease_resistance', 'salt_resistance', 'drought_resistance'}	Calcium-binding EF-hand family protein [Source:NCBI gene (formerly Entrezgene);Acc:832494]	5:8238428-8243443	Arabidopsis thaliana	known
AT5G24540	2	{'disease_resistance', 'salt_resistance'}	beta glucosidase 31 [Source:NCBI gene (formerly Entrezgene);Acc:832525]	5:8384681-8388028	Arabidopsis thaliana	known
AT5G24550	2	{'disease_resistance', 'salt_resistance'}	beta glucosidase 32 [Source:NCBI gene (formerly Entrezgene);Acc:832526]	5:8392059-8395302	Arabidopsis thaliana	known
AT5G24590	2	{'salt_resistance', 'drought_resistance'}	TCV-interacting protein [Source:NCBI gene (formerly Entrezgene);Acc:832530]	5:8416375-8419076	Arabidopsis thaliana	known
AT5G24760	2	{'disease_resistance', 'salt_resistance'}	GroES-like zinc-binding dehydrogenase family protein [Source:NCBI gene (formerly Entrezgene);Acc:832545]	5:8494697-8497610	Arabidopsis thaliana	known
AT5G24940	3	{'disease_resistance', 'salt_resistance', 'drought_resistance'}	Protein phosphatase 2C family protein [Source:NCBI gene (formerly Entrezgene);Acc:832564]	5:8591143-8593601	Arabidopsis thaliana	known
AT5G25110	3	{'disease_resistance', 'salt_resistance', 'drought_resistance'}	CBL-interacting protein kinase 25 [Source:NCBI gene (formerly Entrezgene);Acc:832582]	5:8657604-8659352	Arabidopsis thaliana	known
AT5G25190	2	{'salt_resistance', 'drought_resistance'}	Integrase-type DNA-binding superfamily protein [Source:NCBI gene (formerly Entrezgene);Acc:832590]	5:8706745-8707885	Arabidopsis thaliana	known
AT5G25370	2	{'salt_resistance', 'drought_resistance'}	phospholipase D alpha 3 [Source:NCBI gene (formerly Entrezgene);Acc:832609]	5:8803829-8807783	Arabidopsis thaliana	known
AT5G25390	2	{'salt_resistance', 'drought_resistance'}	Integrase-type DNA-binding superfamily protein [Source:NCBI gene (formerly Entrezgene);Acc:832611]	5:8820458-8822062	Arabidopsis thaliana	known
AT5G25930	2	{'disease_resistance', 'insect_resistance'}	kinase family with leucine-rich repeat domain-containing protein [Source:NCBI gene (formerly Entrezgene);Acc:832662]	5:9050660-9054143	Arabidopsis thaliana	known
AT5G25980	2	{'salt_resistance', 'insect_resistance'}	glucoside glucohydrolase 2 [Source:NCBI gene (formerly Entrezgene);Acc:832667]	5:9072708-9075777	Arabidopsis thaliana	known
AT5G26000	3	{'disease_resistance', 'salt_resistance', 'insect_resistance'}	thioglucoside glucohydrolase 1 [Source:NCBI gene (formerly Entrezgene);Acc:832669]	5:9079452-9082384	Arabidopsis thaliana	known
AT5G26660	2	{'insect_resistance', 'drought_resistance'}	myb domain protein 86 [Source:NCBI gene (formerly Entrezgene);Acc:832723]	5:9331565-9333284	Arabidopsis thaliana	known
AT5G26920	2	{'disease_resistance', 'drought_resistance'}	Cam-binding protein 60-like G [Source:NCBI gene (formerly Entrezgene);Acc:832750]	5:9475679-9478777	Arabidopsis thaliana	known
AT5G26980	2	{'disease_resistance', 'salt_resistance'}	syntaxin of plants 41 [Source:NCBI gene (formerly Entrezgene);Acc:832756]	5:9488133-9491092	Arabidopsis thaliana	known
AT5G28510	3	{'disease_resistance', 'salt_resistance', 'insect_resistance'}	beta glucosidase 24 [Source:NCBI gene (formerly Entrezgene);Acc:832944]	5:10480757-10484073	Arabidopsis thaliana	known
AT5G35410	3	{'disease_resistance', 'salt_resistance', 'drought_resistance'}	Protein kinase superfamily protein [Source:NCBI gene (formerly Entrezgene);Acc:833502]	5:13634399-13638375	Arabidopsis thaliana	known
AT5G35600	2	{'salt_resistance', 'drought_resistance'}	histone deacetylase7 [Source:NCBI gene (formerly Entrezgene);Acc:833525]	5:13770121-13771712	Arabidopsis thaliana	known
AT5G35630	2	{'grain_weight_increase', 'plant_height_reduce'}	glutamine synthetase 2 [Source:NCBI gene (formerly Entrezgene);Acc:833535]	5:13830429-13833542	Arabidopsis thaliana	known
AT5G35750	2	{'salt_resistance', 'drought_resistance'}	histidine kinase 2 [Source:NCBI gene (formerly Entrezgene);Acc:833552]	5:13911283-13916805	Arabidopsis thaliana	known
AT5G35980	3	{'disease_resistance', 'salt_resistance', 'drought_resistance'}	YAK1-like protein 1 [Source:NCBI gene (formerly Entrezgene);Acc:833590]	5:14127960-14136351	Arabidopsis thaliana	known
AT5G36890	2	{'disease_resistance', 'salt_resistance'}	beta glucosidase 42 [Source:NCBI gene (formerly Entrezgene);Acc:833656]	5:14541289-14546230	Arabidopsis thaliana	known
AT5G37600	2	{'grain_weight_increase', 'plant_height_reduce'}		5:14933286-14935885	Arabidopsis thaliana	known
AT5G38210	3	{'disease_resistance', 'salt_resistance', 'drought_resistance'}	Protein kinase family protein [Source:NCBI gene (formerly Entrezgene);Acc:833803]	5:15260750-15265630	Arabidopsis thaliana	known
AT5G39440	3	{'disease_resistance', 'salt_resistance', 'drought_resistance'}	SNF1-related protein kinase 1.3 [Source:NCBI gene (formerly Entrezgene);Acc:833940]	5:15781907-15784699	Arabidopsis thaliana	known
AT5G39610	4	{'disease_resistance', 'grain_weight_increase', 'salt_resistance', 'drought_resistance'}	NAC domain containing protein 6 [Source:NCBI gene (formerly Entrezgene);Acc:833957]	5:15858398-15859911	Arabidopsis thaliana	known
AT5G39700	2	{'salt_resistance', 'drought_resistance'}	myb domain protein 89 [Source:NCBI gene (formerly Entrezgene);Acc:833966]	5:15893761-15894424	Arabidopsis thaliana	known
AT5G39820	3	{'disease_resistance', 'salt_resistance', 'drought_resistance'}	NAC domain containing protein 94 [Source:NCBI gene (formerly Entrezgene);Acc:833978]	5:15939110-15940590	Arabidopsis thaliana	known
AT5G40360	2	{'salt_resistance', 'drought_resistance'}	myb domain protein 115 [Source:NCBI gene (formerly Entrezgene);Acc:834034]	5:16144792-16146671	Arabidopsis thaliana	known
AT5G40440	3	{'disease_resistance', 'salt_resistance', 'drought_resistance'}	mitogen-activated protein kinase kinase 3 [Source:NCBI gene (formerly Entrezgene);Acc:834042]	5:16181628-16184827	Arabidopsis thaliana	known
AT5G41670	3	{'disease_resistance', 'salt_resistance', 'drought_resistance'}	6-phosphogluconate dehydrogenase family protein [Source:NCBI gene (formerly Entrezgene);Acc:834169]	5:16664674-16667390	Arabidopsis thaliana	known
AT5G42250	2	{'disease_resistance', 'salt_resistance'}	Zinc-binding alcohol dehydrogenase family protein [Source:NCBI gene (formerly Entrezgene);Acc:834230]	5:16893849-16897690	Arabidopsis thaliana	known
AT5G42260	2	{'disease_resistance', 'salt_resistance'}	beta glucosidase 12 [Source:NCBI gene (formerly Entrezgene);Acc:834231]	5:16898712-16900317	Arabidopsis thaliana	known
AT5G42380	2	{'salt_resistance', 'drought_resistance'}	calmodulin like 37 [Source:NCBI gene (formerly Entrezgene);Acc:834244]	5:16942447-16943820	Arabidopsis thaliana	known
AT5G43060	3	{'disease_resistance', 'salt_resistance', 'drought_resistance'}	Granulin repeat cysteine protease family protein [Source:NCBI gene (formerly Entrezgene);Acc:834321]	5:17269310-17272298	Arabidopsis thaliana	known
AT5G43410	3	{'disease_resistance', 'salt_resistance', 'drought_resistance'}	Integrase-type DNA-binding superfamily protein [Source:NCBI gene (formerly Entrezgene);Acc:834360]	5:17435010-17435405	Arabidopsis thaliana	known
AT5G43940	2	{'disease_resistance', 'salt_resistance'}	GroES-like zinc-binding dehydrogenase family protein [Source:NCBI gene (formerly Entrezgene);Acc:834417]	5:17684156-17686534	Arabidopsis thaliana	known
AT5G44030	3	{'disease_resistance', 'salt_resistance', 'drought_resistance'}	cellulose synthase A4 [Source:NCBI gene (formerly Entrezgene);Acc:834426]	5:17714390-17719723	Arabidopsis thaliana	known
AT5G44210	3	{'disease_resistance', 'salt_resistance', 'drought_resistance'}	erf domain protein 9 [Source:NCBI gene (formerly Entrezgene);Acc:834444]	5:17806397-17807541	Arabidopsis thaliana	known
AT5G44640	2	{'disease_resistance', 'salt_resistance'}	beta glucosidase 13 [Source:NCBI gene (formerly Entrezgene);Acc:834493]	5:18011146-18012882	Arabidopsis thaliana	known
AT5G44650	2	{'salt_resistance', 'drought_resistance'}	death domain associated protein [Source:NCBI gene (formerly Entrezgene);Acc:834494]	5:18013149-18015434	Arabidopsis thaliana	known
AT5G44700	3	{'disease_resistance', 'plant_height_reduce', 'insect_resistance'}	Leucine-rich repeat transmembrane protein kinase [Source:NCBI gene (formerly Entrezgene);Acc:834499]	5:18032864-18037323	Arabidopsis thaliana	known
AT5G45060	2	{'disease_resistance', 'insect_resistance'}	Disease resistance protein (TIR-NBS-LRR class) family [Source:NCBI gene (formerly Entrezgene);Acc:834537]	5:18182038-18187081	Arabidopsis thaliana	known
AT5G45110	2	{'disease_resistance', 'insect_resistance'}	NPR1-like protein 3 [Source:NCBI gene (formerly Entrezgene);Acc:834545]	5:18228768-18231588	Arabidopsis thaliana	known
AT5G45250	2	{'disease_resistance', 'insect_resistance'}	Disease resistance protein (TIR-NBS-LRR class) family [Source:NCBI gene (formerly Entrezgene);Acc:834561]	5:18321764-18326175	Arabidopsis thaliana	known
AT5G45340	2	{'salt_resistance', 'drought_resistance'}	cytochrome P450, family 707, subfamily A, polypeptide 3 [Source:NCBI gene (formerly Entrezgene);Acc:834570]	5:18368532-18371021	Arabidopsis thaliana	known
AT5G45430	3	{'disease_resistance', 'salt_resistance', 'drought_resistance'}	Protein kinase superfamily protein [Source:NCBI gene (formerly Entrezgene);Acc:834579]	5:18407150-18411977	Arabidopsis thaliana	known
AT5G45670	3	{'disease_resistance', 'salt_resistance', 'drought_resistance'}	GDSL-like Lipase/Acylhydrolase superfamily protein [Source:NCBI gene (formerly Entrezgene);Acc:834606]	5:18528267-18530501	Arabidopsis thaliana	known
AT5G45780	2	{'disease_resistance', 'grain_weight_increase'}	Leucine-rich repeat protein kinase family protein [Source:NCBI gene (formerly Entrezgene);Acc:834618]	5:18566798-18569906	Arabidopsis thaliana	known
AT5G45810	3	{'disease_resistance', 'salt_resistance', 'drought_resistance'}	CBL-interacting protein kinase 19 [Source:NCBI gene (formerly Entrezgene);Acc:834621]	5:18584676-18586590	Arabidopsis thaliana	known
AT5G45820	3	{'disease_resistance', 'salt_resistance', 'drought_resistance'}	CBL-interacting protein kinase 20 [Source:NCBI gene (formerly Entrezgene);Acc:834622]	5:18586870-18588792	Arabidopsis thaliana	known
AT5G45860	2	{'salt_resistance', 'drought_resistance'}	PYR1-like 11 [Source:NCBI gene (formerly Entrezgene);Acc:834626]	5:18603990-18604677	Arabidopsis thaliana	known
AT5G45870	2	{'salt_resistance', 'drought_resistance'}	PYR1-like 12 [Source:NCBI gene (formerly Entrezgene);Acc:834627]	5:18606398-18607111	Arabidopsis thaliana	known
AT5G45890	3	{'disease_resistance', 'salt_resistance', 'drought_resistance'}	senescence-associated 12 [Source:NCBI gene (formerly Entrezgene);Acc:834629]	5:18613239-18614963	Arabidopsis thaliana	known
AT5G46180	2	{'disease_resistance', 'salt_resistance'}	ornithine-delta-aminotransferase [Source:NCBI gene (formerly Entrezgene);Acc:834660]	5:18718417-18721744	Arabidopsis thaliana	known
AT5G46240	2	{'salt_resistance', 'insect_resistance'}	1 [Source:NCBI gene (formerly Entrezgene);Acc:834666]	5:18743510-18747406	Arabidopsis thaliana	known
AT5G46330	2	{'disease_resistance', 'insect_resistance'}	Leucine-rich receptor-like protein kinase family protein [Source:NCBI gene (formerly Entrezgene);Acc:834676]	5:18791575-18795908	Arabidopsis thaliana	known
AT5G46590	2	{'salt_resistance', 'drought_resistance'}	NAC domain containing protein 96 [Source:NCBI gene (formerly Entrezgene);Acc:834702]	5:18905258-18907052	Arabidopsis thaliana	known
AT5G46790	2	{'salt_resistance', 'drought_resistance'}	PYR1-like 1 [Source:NCBI gene (formerly Entrezgene);Acc:834722]	5:18983540-18984923	Arabidopsis thaliana	known
AT5G47100	3	{'disease_resistance', 'salt_resistance', 'drought_resistance'}	calcineurin B-like protein 9 [Source:NCBI gene (formerly Entrezgene);Acc:834756]	5:19129640-19132304	Arabidopsis thaliana	known
AT5G47210	2	{'salt_resistance', 'drought_resistance'}	Hyaluronan / mRNA binding family [Source:NCBI gene (formerly Entrezgene);Acc:834767]	5:19168941-19171263	Arabidopsis thaliana	known
AT5G47220	3	{'disease_resistance', 'salt_resistance', 'drought_resistance'}	ethylene responsive element binding factor 2 [Source:NCBI gene (formerly Entrezgene);Acc:834768]	5:19171643-19172956	Arabidopsis thaliana	known
AT5G47230	3	{'disease_resistance', 'salt_resistance', 'drought_resistance'}	ethylene responsive element binding factor 5 [Source:NCBI gene (formerly Entrezgene);Acc:834770]	5:19179881-19181182	Arabidopsis thaliana	known
AT5G49130	2	{'disease_resistance', 'drought_resistance'}	MATE efflux family protein [Source:NCBI gene (formerly Entrezgene);Acc:834972]	5:19915872-19917967	Arabidopsis thaliana	known
AT5G49330	3	{'salt_resistance', 'insect_resistance', 'drought_resistance'}	myb domain protein 111 [Source:NCBI gene (formerly Entrezgene);Acc:834993]	5:19998823-20001572	Arabidopsis thaliana	known
AT5G49470	2	{'disease_resistance', 'drought_resistance'}	PAS domain-containing protein tyrosine kinase family protein [Source:NCBI gene (formerly Entrezgene);Acc:835007]	5:20063331-20068793	Arabidopsis thaliana	known
AT5G49660	2	{'disease_resistance', 'plant_height_reduce'}	Leucine-rich repeat transmembrane protein kinase family protein [Source:NCBI gene (formerly Entrezgene);Acc:835028]	5:20161140-20164729	Arabidopsis thaliana	known
AT5G49770	2	{'disease_resistance', 'salt_resistance'}	Leucine-rich repeat protein kinase family protein [Source:NCBI gene (formerly Entrezgene);Acc:835040]	5:20222669-20227466	Arabidopsis thaliana	known
AT5G50080	2	{'salt_resistance', 'drought_resistance'}	ethylene response factor 110 [Source:NCBI gene (formerly Entrezgene);Acc:835072]	5:20365722-20367093	Arabidopsis thaliana	known
AT5G50260	3	{'disease_resistance', 'salt_resistance', 'drought_resistance'}	Cysteine proteinases superfamily protein [Source:NCBI gene (formerly Entrezgene);Acc:835091]	5:20455317-20457068	Arabidopsis thaliana	known
AT5G51190	3	{'disease_resistance', 'salt_resistance', 'drought_resistance'}	Integrase-type DNA-binding superfamily protein [Source:NCBI gene (formerly Entrezgene);Acc:835193]	5:20800473-20801437	Arabidopsis thaliana	known
AT5G51760	3	{'disease_resistance', 'salt_resistance', 'drought_resistance'}	Protein phosphatase 2C family protein [Source:NCBI gene (formerly Entrezgene);Acc:835250]	5:21026805-21029188	Arabidopsis thaliana	known
AT5G52050	2	{'disease_resistance', 'drought_resistance'}	MATE efflux family protein [Source:NCBI gene (formerly Entrezgene);Acc:835280]	5:21138703-21140876	Arabidopsis thaliana	known
AT5G52310	2	{'salt_resistance', 'drought_resistance'}	low-temperature-responsive protein 78 (LTI78) / desiccation-responsive protein 29A (RD29A) [Source:NCBI gene (formerly Entrezgene);Acc:835307]	5:21240717-21243644	Arabidopsis thaliana	known
AT5G52360	2	{'disease_resistance', 'insect_resistance'}	actin depolymerizing factor 10 [Source:NCBI gene (formerly Entrezgene);Acc:835312]	5:21257934-21259408	Arabidopsis thaliana	known
AT5G52640	2	{'disease_resistance', 'salt_resistance'}	heat shock-like protein [Source:NCBI gene (formerly Entrezgene);Acc:835341]	5:21352557-21355147	Arabidopsis thaliana	known
AT5G53130	2	{'disease_resistance', 'salt_resistance'}	cyclic nucleotide gated channel 1 [Source:NCBI gene (formerly Entrezgene);Acc:835393]	5:21537721-21541029	Arabidopsis thaliana	known
AT5G53140	3	{'disease_resistance', 'salt_resistance', 'drought_resistance'}	Protein phosphatase 2C family protein [Source:NCBI gene (formerly Entrezgene);Acc:835395]	5:21548397-21552594	Arabidopsis thaliana	known
AT5G53160	2	{'salt_resistance', 'drought_resistance'}	regulatory components of ABA receptor 3 [Source:NCBI gene (formerly Entrezgene);Acc:835397]	5:21560601-21562709	Arabidopsis thaliana	known
AT5G53290	2	{'salt_resistance', 'drought_resistance'}	cytokinin response factor 3 [Source:NCBI gene (formerly Entrezgene);Acc:835410]	5:21617714-21619281	Arabidopsis thaliana	known
AT5G53660	3	{'disease_resistance', 'grain_weight_increase', 'plant_height_reduce'}	growth-regulating factor 7 [Source:NCBI gene (formerly Entrezgene);Acc:835447]	5:21794177-21796092	Arabidopsis thaliana	known
AT5G53950	5	{'grain_weight_increase', 'disease_resistance', 'drought_resistance', 'plant_height_reduce', 'salt_resistance'}	NAC (No Apical Meristem) domain transcriptional regulator superfamily protein [Source:NCBI gene (formerly Entrezgene);Acc:835478]	5:21901704-21903854	Arabidopsis thaliana	known
AT5G54230	4	{'disease_resistance', 'salt_resistance', 'insect_resistance', 'drought_resistance'}	myb domain protein 49 [Source:NCBI gene (formerly Entrezgene);Acc:835511]	5:22016143-22018061	Arabidopsis thaliana	known
AT5G54250	2	{'disease_resistance', 'salt_resistance'}	cyclic nucleotide-gated cation channel 4 [Source:NCBI gene (formerly Entrezgene);Acc:835513]	5:22025035-22030099	Arabidopsis thaliana	known
AT5G54570	2	{'disease_resistance', 'salt_resistance'}	beta glucosidase 41 [Source:NCBI gene (formerly Entrezgene);Acc:835545]	5:22167636-22170235	Arabidopsis thaliana	known
AT5G55830	3	{'disease_resistance', 'salt_resistance', 'plant_height_reduce'}	Concanavalin A-like lectin protein kinase family protein [Source:NCBI gene (formerly Entrezgene);Acc:835677]	5:22594617-22596843	Arabidopsis thaliana	known
AT5G55990	3	{'disease_resistance', 'salt_resistance', 'drought_resistance'}	calcineurin B-like protein 2 [Source:NCBI gene (formerly Entrezgene);Acc:835697]	5:22671113-22674100	Arabidopsis thaliana	known
AT5G56000	2	{'disease_resistance', 'salt_resistance'}	HEAT SHOCK PROTEIN 81.4 [Source:NCBI gene (formerly Entrezgene);Acc:835698]	5:22677338-22680152	Arabidopsis thaliana	known
AT5G56010	2	{'disease_resistance', 'salt_resistance'}	heat shock protein 81-3 [Source:NCBI gene (formerly Entrezgene);Acc:835699]	5:22681238-22684252	Arabidopsis thaliana	known
AT5G56030	2	{'disease_resistance', 'salt_resistance'}	heat shock protein 81-2 [Source:NCBI gene (formerly Entrezgene);Acc:835701]	5:22686473-22689671	Arabidopsis thaliana	known
AT5G56040	2	{'disease_resistance', 'plant_height_reduce'}	Leucine-rich receptor-like protein kinase family protein [Source:NCBI gene (formerly Entrezgene);Acc:835702]	5:22694823-22698645	Arabidopsis thaliana	known
AT5G56110	4	{'disease_resistance', 'salt_resistance', 'insect_resistance', 'drought_resistance'}	myb domain protein 103 [Source:NCBI gene (formerly Entrezgene);Acc:835710]	5:22719191-22720664	Arabidopsis thaliana	known
AT5G56580	3	{'disease_resistance', 'salt_resistance', 'drought_resistance'}	MAP kinase kinase 6 [Source:NCBI gene (formerly Entrezgene);Acc:835759]	5:22904622-22906764	Arabidopsis thaliana	known
AT5G56950	2	{'disease_resistance', 'salt_resistance'}	nucleosome assembly protein 1;3 [Source:NCBI gene (formerly Entrezgene);Acc:835797]	5:23032449-23035693	Arabidopsis thaliana	known
AT5G57050	3	{'disease_resistance', 'salt_resistance', 'drought_resistance'}	Protein phosphatase 2C family protein [Source:NCBI gene (formerly Entrezgene);Acc:835809]	5:23087122-23089631	Arabidopsis thaliana	known
AT5G57580	2	{'disease_resistance', 'drought_resistance'}	Calmodulin-binding protein [Source:NCBI gene (formerly Entrezgene);Acc:835862]	5:23314672-23318177	Arabidopsis thaliana	known
AT5G57630	3	{'disease_resistance', 'salt_resistance', 'drought_resistance'}	CBL-interacting protein kinase 21 [Source:NCBI gene (formerly Entrezgene);Acc:835868]	5:23340746-23343489	Arabidopsis thaliana	known
AT5G57800	2	{'salt_resistance', 'drought_resistance'}	Fatty acid hydroxylase superfamily [Source:NCBI gene (formerly Entrezgene);Acc:835889]	5:23420184-23424117	Arabidopsis thaliana	known
AT5G57940	2	{'disease_resistance', 'salt_resistance'}	cyclic nucleotide gated channel 5 [Source:NCBI gene (formerly Entrezgene);Acc:835905]	5:23456565-23460621	Arabidopsis thaliana	known
AT5G58070	2	{'salt_resistance', 'drought_resistance'}	temperature-induced lipocalin [Source:NCBI gene (formerly Entrezgene);Acc:835919]	5:23500061-23501416	Arabidopsis thaliana	known
AT5G58380	3	{'disease_resistance', 'salt_resistance', 'drought_resistance'}	SOS3-interacting protein 1 [Source:NCBI gene (formerly Entrezgene);Acc:835951]	5:23596962-23599353	Arabidopsis thaliana	known
AT5G58850	2	{'salt_resistance', 'drought_resistance'}	myb domain protein 119 [Source:NCBI gene (formerly Entrezgene);Acc:836002]	5:23763945-23765556	Arabidopsis thaliana	known
AT5G58940	2	{'disease_resistance', 'salt_resistance'}	calmodulin-binding receptor-like cytoplasmic kinase 1 [Source:NCBI gene (formerly Entrezgene);Acc:836011]	5:23797446-23800954	Arabidopsis thaliana	known
AT5G59220	3	{'disease_resistance', 'salt_resistance', 'drought_resistance'}	PP2C protein (Clade A protein phosphatases type 2C) [Source:NCBI gene (formerly Entrezgene);Acc:836040]	5:23894404-23896939	Arabidopsis thaliana	known
AT5G59670	2	{'disease_resistance', 'grain_weight_increase'}	Leucine-rich repeat protein kinase family protein [Source:NCBI gene (formerly Entrezgene);Acc:836088]	5:24041131-24045666	Arabidopsis thaliana	known
AT5G59720	2	{'disease_resistance', 'salt_resistance'}	heat shock protein 18.2 [Source:NCBI gene (formerly Entrezgene);Acc:836093]	5:24062323-24063300	Arabidopsis thaliana	known
AT5G59880	2	{'disease_resistance', 'insect_resistance'}	actin depolymerizing factor 3 [Source:NCBI gene (formerly Entrezgene);Acc:836110]	5:24120164-24121949	Arabidopsis thaliana	known
AT5G59890	2	{'disease_resistance', 'insect_resistance'}	actin depolymerizing factor 4 [Source:NCBI gene (formerly Entrezgene);Acc:836111]	5:24122348-24123912	Arabidopsis thaliana	known
AT5G60270	2	{'salt_resistance', 'plant_height_reduce'}	Concanavalin A-like lectin protein kinase family protein [Source:NCBI gene (formerly Entrezgene);Acc:836149]	5:24257723-24260043	Arabidopsis thaliana	known
AT5G60280	2	{'salt_resistance', 'plant_height_reduce'}	Concanavalin A-like lectin protein kinase family protein [Source:NCBI gene (formerly Entrezgene);Acc:836150]	5:24260225-24262536	Arabidopsis thaliana	known
AT5G60300	2	{'salt_resistance', 'plant_height_reduce'}	Concanavalin A-like lectin protein kinase family protein [Source:NCBI gene (formerly Entrezgene);Acc:836152]	5:24264488-24268029	Arabidopsis thaliana	known
AT5G60310	2	{'salt_resistance', 'plant_height_reduce'}	Concanavalin A-like lectin protein kinase family protein [Source:NCBI gene (formerly Entrezgene);Acc:836153]	5:24268011-24270269	Arabidopsis thaliana	known
AT5G60320	2	{'salt_resistance', 'plant_height_reduce'}	Concanavalin A-like lectin protein kinase family protein [Source:NCBI gene (formerly Entrezgene);Acc:836154]	5:24270808-24272835	Arabidopsis thaliana	known
AT5G60360	2	{'salt_resistance', 'drought_resistance'}	aleurain-like protease [Source:NCBI gene (formerly Entrezgene);Acc:836158]	5:24279660-24282482	Arabidopsis thaliana	known
AT5G60410	2	{'salt_resistance', 'drought_resistance'}	DNA-binding protein with MIZ/SP-RING zinc finger, PHD-finger and SAP domain-containing protein [Source:NCBI gene (formerly Entrezgene);Acc:836163]	5:24294704-24301157	Arabidopsis thaliana	known
AT5G60690	2	{'disease_resistance', 'drought_resistance'}	Homeobox-leucine zipper family protein / lipid-binding START domain-containing protein [Source:NCBI gene (formerly Entrezgene);Acc:836190]	5:24396981-24402195	Arabidopsis thaliana	known
AT5G60890	3	{'salt_resistance', 'insect_resistance', 'drought_resistance'}	myb domain protein 34 [Source:NCBI gene (formerly Entrezgene);Acc:836210]	5:24494291-24496371	Arabidopsis thaliana	known
AT5G60910	2	{'disease_resistance', 'plant_height_reduce'}	AGAMOUS-like 8 [Source:NCBI gene (formerly Entrezgene);Acc:836212]	5:24502434-24506269	Arabidopsis thaliana	known
AT5G61420	4	{'disease_resistance', 'salt_resistance', 'insect_resistance', 'drought_resistance'}	myb domain protein 28 [Source:NCBI gene (formerly Entrezgene);Acc:836263]	5:24689069-24691187	Arabidopsis thaliana	known
AT5G61430	3	{'disease_resistance', 'salt_resistance', 'drought_resistance'}	NAC domain containing protein 100 [Source:NCBI gene (formerly Entrezgene);Acc:836264]	5:24701062-24702787	Arabidopsis thaliana	known
AT5G61590	2	{'disease_resistance', 'drought_resistance'}	Integrase-type DNA-binding superfamily protein [Source:NCBI gene (formerly Entrezgene);Acc:836280]	5:24764256-24765511	Arabidopsis thaliana	known
AT5G61600	3	{'disease_resistance', 'salt_resistance', 'drought_resistance'}	ethylene response factor 104 [Source:NCBI gene (formerly Entrezgene);Acc:836281]	5:24766344-24767732	Arabidopsis thaliana	known
AT5G61880	2	{'salt_resistance', 'drought_resistance'}	Protein Transporter, Pam16 [Source:NCBI gene (formerly Entrezgene);Acc:836309]	5:24850211-24851803	Arabidopsis thaliana	known
AT5G61890	3	{'disease_resistance', 'salt_resistance', 'drought_resistance'}	Integrase-type DNA-binding superfamily protein [Source:NCBI gene (formerly Entrezgene);Acc:836310]	5:24852322-24853941	Arabidopsis thaliana	known
AT5G62165	2	{'disease_resistance', 'plant_height_reduce'}	AGAMOUS-like 42 [Source:NCBI gene (formerly Entrezgene);Acc:836337]	5:24964646-24968607	Arabidopsis thaliana	known
AT5G62230	2	{'disease_resistance', 'plant_height_reduce'}	ERECTA-like 1 [Source:NCBI gene (formerly Entrezgene);Acc:836344]	5:24996129-25002439	Arabidopsis thaliana	known
AT5G62320	3	{'salt_resistance', 'insect_resistance', 'drought_resistance'}	myb domain protein 99 [Source:NCBI gene (formerly Entrezgene);Acc:836353]	5:25028716-25029933	Arabidopsis thaliana	known
AT5G62380	4	{'disease_resistance', 'salt_resistance', 'plant_height_reduce', 'drought_resistance'}	NAC-domain protein 101 [Source:NCBI gene (formerly Entrezgene);Acc:836359]	5:25050152-25052054	Arabidopsis thaliana	known
AT5G62470	3	{'salt_resistance', 'insect_resistance', 'drought_resistance'}	myb domain protein 96 [Source:NCBI gene (formerly Entrezgene);Acc:836367]	5:25078991-25081141	Arabidopsis thaliana	known
AT5G62570	2	{'disease_resistance', 'drought_resistance'}	Calmodulin binding protein-like protein [Source:NCBI gene (formerly Entrezgene);Acc:836377]	5:25113948-25117314	Arabidopsis thaliana	known
AT5G63110	2	{'salt_resistance', 'drought_resistance'}	histone deacetylase 6 [Source:NCBI gene (formerly Entrezgene);Acc:836431]	5:25315506-25318347	Arabidopsis thaliana	known
AT5G63120	3	{'disease_resistance', 'salt_resistance', 'drought_resistance'}	P-loop containing nucleoside triphosphate hydrolases superfamily protein [Source:NCBI gene (formerly Entrezgene);Acc:836432]	5:25318642-25322284	Arabidopsis thaliana	known
AT5G63370	3	{'disease_resistance', 'salt_resistance', 'drought_resistance'}	Protein kinase superfamily protein [Source:NCBI gene (formerly Entrezgene);Acc:836456]	5:25383810-25387270	Arabidopsis thaliana	known
AT5G63650	3	{'disease_resistance', 'salt_resistance', 'drought_resistance'}	SNF1-related protein kinase 2.5 [Source:NCBI gene (formerly Entrezgene);Acc:836485]	5:25481334-25483799	Arabidopsis thaliana	known
AT5G63710	2	{'disease_resistance', 'grain_weight_increase'}	Leucine-rich repeat protein kinase family protein [Source:NCBI gene (formerly Entrezgene);Acc:836491]	5:25499378-25503023	Arabidopsis thaliana	known
AT5G63790	4	{'disease_resistance', 'grain_weight_increase', 'salt_resistance', 'drought_resistance'}	NAC domain containing protein 102 [Source:NCBI gene (formerly Entrezgene);Acc:836499]	5:25526509-25528281	Arabidopsis thaliana	known
AT5G63930	4	{'disease_resistance', 'grain_weight_increase', 'plant_height_reduce', 'insect_resistance'}	Leucine-rich repeat protein kinase family protein [Source:NCBI gene (formerly Entrezgene);Acc:836514]	5:25581696-25586630	Arabidopsis thaliana	known
AT5G64060	2	{'salt_resistance', 'drought_resistance'}	NAC domain containing protein 103 [Source:NCBI gene (formerly Entrezgene);Acc:836527]	5:25633455-25635789	Arabidopsis thaliana	known
AT5G64220	2	{'salt_resistance', 'insect_resistance'}	Calmodulin-binding transcription activator protein with CG-1 and Ankyrin domain [Source:NCBI gene (formerly Entrezgene);Acc:836543]	5:25686193-25692339	Arabidopsis thaliana	known
AT5G64740	3	{'disease_resistance', 'salt_resistance', 'drought_resistance'}	cellulose synthase 6 [Source:NCBI gene (formerly Entrezgene);Acc:836595]	5:25881033-25886728	Arabidopsis thaliana	known
AT5G64750	2	{'salt_resistance', 'drought_resistance'}	Integrase-type DNA-binding superfamily protein [Source:NCBI gene (formerly Entrezgene);Acc:836596]	5:25891449-25893888	Arabidopsis thaliana	known
AT5G64960	2	{'disease_resistance', 'salt_resistance'}	cyclin dependent kinase group C2 [Source:NCBI gene (formerly Entrezgene);Acc:836620]	5:25955374-25958995	Arabidopsis thaliana	known
AT5G65100	2	{'disease_resistance', 'salt_resistance'}	Ethylene insensitive 3 family protein [Source:NCBI gene (formerly Entrezgene);Acc:836634]	5:26006835-26008535	Arabidopsis thaliana	known
AT5G65130	2	{'salt_resistance', 'drought_resistance'}	Integrase-type DNA-binding superfamily protein [Source:NCBI gene (formerly Entrezgene);Acc:836637]	5:26017185-26018349	Arabidopsis thaliana	known
AT5G65230	4	{'disease_resistance', 'salt_resistance', 'insect_resistance', 'drought_resistance'}	myb domain protein 53 [Source:NCBI gene (formerly Entrezgene);Acc:836648]	5:26068112-26069652	Arabidopsis thaliana	known
AT5G65240	2	{'disease_resistance', 'grain_weight_increase'}	Leucine-rich repeat protein kinase family protein [Source:NCBI gene (formerly Entrezgene);Acc:836649]	5:26073671-26078259	Arabidopsis thaliana	known
AT5G65700	2	{'disease_resistance', 'plant_height_reduce'}	Leucine-rich receptor-like protein kinase family protein [Source:NCBI gene (formerly Entrezgene);Acc:836699]	5:26281642-26285413	Arabidopsis thaliana	known
AT5G66210	2	{'disease_resistance', 'salt_resistance'}	calcium-dependent protein kinase 28 [Source:NCBI gene (formerly Entrezgene);Acc:836753]	5:26456142-26459654	Arabidopsis thaliana	known
AT5G66300	3	{'disease_resistance', 'salt_resistance', 'drought_resistance'}	NAC domain containing protein 105 [Source:NCBI gene (formerly Entrezgene);Acc:836762]	5:26479766-26481528	Arabidopsis thaliana	known
AT5G66770	2	{'salt_resistance', 'drought_resistance'}	GRAS family transcription factor [Source:NCBI gene (formerly Entrezgene);Acc:836810]	5:26660311-26662919	Arabidopsis thaliana	known
AT5G66790	2	{'disease_resistance', 'drought_resistance'}	Protein kinase superfamily protein [Source:NCBI gene (formerly Entrezgene);Acc:836812]	5:26664842-26667809	Arabidopsis thaliana	known
AT5G66880	3	{'disease_resistance', 'salt_resistance', 'drought_resistance'}	sucrose nonfermenting 1(SNF1)-related protein kinase 2.3 [Source:NCBI gene (formerly Entrezgene);Acc:836822]	5:26710302-26712971	Arabidopsis thaliana	known
AT5G67030	3	{'disease_resistance', 'salt_resistance', 'drought_resistance'}	zeaxanthin epoxidase (ZEP) (ABA1) [Source:NCBI gene (formerly Entrezgene);Acc:836838]	5:26753469-26757402	Arabidopsis thaliana	known
AT5G67300	2	{'salt_resistance', 'drought_resistance'}	myb domain protein r1 [Source:NCBI gene (formerly Entrezgene);Acc:836865]	5:26854022-26856006	Arabidopsis thaliana	known
LOC_Os01g09800	2	{'disease_resistance', 'insect_resistance'}		1:5060416-5065236	Oryza sativa Japonica Group	known
LOC_Os01g40094	3	{'disease_resistance', 'salt_resistance', 'drought_resistance'}		1:22617780-22624147	Oryza sativa Japonica Group	known
LOC_Os01g50910	2	{'salt_resistance', 'drought_resistance'}		1:29233028-29234256	Oryza sativa Japonica Group	known
LOC_Os01g56200	2	{'disease_resistance', 'insect_resistance'}		1:32367683-32371816	Oryza sativa Japonica Group	known
LOC_Os01g61990	2	{'disease_resistance', 'salt_resistance'}		1:35884769-35889014	Oryza sativa Japonica Group	known
LOC_Os01g66120	3	{'disease_resistance', 'salt_resistance', 'drought_resistance'}		1:38398517-38401533	Oryza sativa Japonica Group	known
LOC_Os02g02400	2	{'salt_resistance', 'drought_resistance'}		2:824850-827644	Oryza sativa Japonica Group	known
LOC_Os02g08230	2	{'salt_resistance', 'drought_resistance'}		2:4355045-4362388	Oryza sativa Japonica Group	known
LOC_Os02g08440	3	{'disease_resistance', 'salt_resistance', 'drought_resistance'}		2:4542762-4544983	Oryza sativa Japonica Group	known
LOC_Os02g15640	2	{'salt_resistance', 'drought_resistance'}		2:8801325-8805453	Oryza sativa Japonica Group	known
LOC_Os02g32520	2	{'salt_resistance', 'drought_resistance'}		2:19251345-19256303	Oryza sativa Japonica Group	known
LOC_Os02g40784	2	{'salt_resistance', 'drought_resistance'}		2:24718047-24724120	Oryza sativa Japonica Group	known
LOC_Os02g47280	3	{'disease_resistance', 'grain_weight_increase', 'plant_height_reduce'}		2:28863173-28866997	Oryza sativa Japonica Group	known
LOC_Os02g50240	2	{'grain_weight_increase', 'plant_height_reduce'}		2:30674776-30678659	Oryza sativa Japonica Group	known
LOC_Os02g52250	2	{'salt_resistance', 'drought_resistance'}		2:31995218-31997697	Oryza sativa Japonica Group	known
LOC_Os02g52780	2	{'salt_resistance', 'drought_resistance'}		2:32276591-32281653	Oryza sativa Japonica Group	known
LOC_Os02g56920	2	{'salt_resistance', 'drought_resistance'}		2:34889555-34893873	Oryza sativa Japonica Group	known
LOC_Os03g03910	2	{'salt_resistance', 'drought_resistance'}		3:1787648-1790957	Oryza sativa Japonica Group	known
LOC_Os03g12290	2	{'grain_weight_increase', 'plant_height_reduce'}		3:6457910-6462727	Oryza sativa Japonica Group	known
LOC_Os03g12660	2	{'disease_resistance', 'grain_weight_increase'}		3:6737549-6744506	Oryza sativa Japonica Group	known
LOC_Os03g17700	3	{'disease_resistance', 'salt_resistance', 'drought_resistance'}		3:9847700-9850473	Oryza sativa Japonica Group	known
LOC_Os03g20790	2	{'disease_resistance', 'salt_resistance'}		3:11776086-11778008	Oryza sativa Japonica Group	known
LOC_Os03g21060	4	{'disease_resistance', 'grain_weight_increase', 'salt_resistance', 'drought_resistance'}		3:11973970-11976426	Oryza sativa Japonica Group	known
LOC_Os03g32314	2	{'salt_resistance', 'insect_resistance'}		3:18485606-18488371	Oryza sativa Japonica Group	known
LOC_Os03g41460	3	{'disease_resistance', 'salt_resistance', 'drought_resistance'}		3:23068745-23071303	Oryza sativa Japonica Group	known
LOC_Os03g44380	3	{'disease_resistance', 'salt_resistance', 'drought_resistance'}		3:24959107-24961777	Oryza sativa Japonica Group	known
LOC_Os03g46440	2	{'disease_resistance', 'insect_resistance'}		3:26259737-26267273	Oryza sativa Japonica Group	known
LOC_Os03g52320	2	{'grain_weight_increase', 'plant_height_reduce'}		3:30045079-30048795	Oryza sativa Japonica Group	known
LOC_Os03g55600	3	{'disease_resistance', 'salt_resistance', 'drought_resistance'}		3:31652694-31658253	Oryza sativa Japonica Group	known
LOC_Os03g60080	4	{'disease_resistance', 'grain_weight_increase', 'salt_resistance', 'drought_resistance'}		3:34166099-34167546	Oryza sativa Japonica Group	known
LOC_Os04g32850	2	{'disease_resistance', 'salt_resistance'}		4:19835131-19836892	Oryza sativa Japonica Group	known
LOC_Os04g37619	3	{'disease_resistance', 'salt_resistance', 'drought_resistance'}		4:22369632-22376812	Oryza sativa Japonica Group	known
LOC_Os04g38720	5	{'grain_weight_increase', 'disease_resistance', 'drought_resistance', 'plant_height_reduce', 'salt_resistance'}		4:22994552-22996740	Oryza sativa Japonica Group	known
LOC_Os04g39430	2	{'disease_resistance', 'grain_weight_increase'}		4:23467128-23471594	Oryza sativa Japonica Group	known
LOC_Os04g47300	2	{'disease_resistance', 'salt_resistance'}		4:28079505-28082320	Oryza sativa Japonica Group	known
LOC_Os04g52479	2	{'grain_weight_increase', 'plant_height_reduce'}		4:31203525-31214741	Oryza sativa Japonica Group	known
LOC_Os04g55920	2	{'salt_resistance', 'drought_resistance'}		4:33306461-33310232	Oryza sativa Japonica Group	known
LOC_Os05g12260	2	{'salt_resistance', 'drought_resistance'}		5:7034287-7036754	Oryza sativa Japonica Group	known
LOC_Os05g25770	4	{'disease_resistance', 'salt_resistance', 'insect_resistance', 'drought_resistance'}		5:14991579-14993800	Oryza sativa Japonica Group	known
LOC_Os05g46040	3	{'disease_resistance', 'salt_resistance', 'drought_resistance'}		5:26705164-26707820	Oryza sativa Japonica Group	known
LOC_Os05g51510	3	{'disease_resistance', 'salt_resistance', 'drought_resistance'}		5:29538429-29542019	Oryza sativa Japonica Group	known
LOC_Os06g10230	3	{'disease_resistance', 'grain_weight_increase', 'plant_height_reduce'}		6:5244239-5251843	Oryza sativa Japonica Group	known
LOC_Os06g10880	2	{'salt_resistance', 'drought_resistance'}		6:5677080-5682126	Oryza sativa Japonica Group	known
LOC_Os06g11290	2	{'salt_resistance', 'drought_resistance'}				known
LOC_Os06g36670	2	{'salt_resistance', 'drought_resistance'}		6:21556404-21557334	Oryza sativa Japonica Group	known
LOC_Os06g38470	2	{'salt_resistance', 'drought_resistance'}		6:22794323-22800221	Oryza sativa Japonica Group	known
LOC_Os06g44010	3	{'disease_resistance', 'salt_resistance', 'drought_resistance'}		6:26509919-26511699	Oryza sativa Japonica Group	known
LOC_Os06g44300	2	{'salt_resistance', 'drought_resistance'}		6:26736603-26744116	Oryza sativa Japonica Group	known
LOC_Os06g51150	2	{'salt_resistance', 'drought_resistance'}		6:30944196-30948366	Oryza sativa Japonica Group	known
LOC_Os07g01150	2	{'disease_resistance', 'drought_resistance'}		7:88336-90761	Oryza sativa Japonica Group	known
LOC_Os07g06130	2	{'grain_weight_increase', 'salt_resistance'}		7:2984109-2991139	Oryza sativa Japonica Group	known
LOC_Os08g07760	3	{'disease_resistance', 'grain_weight_increase', 'plant_height_reduce'}		8:4344171-4350502	Oryza sativa Japonica Group	known
LOC_Os08g09250	2	{'disease_resistance', 'salt_resistance'}		8:5373216-5377152	Oryza sativa Japonica Group	known
LOC_Os08g35740	2	{'salt_resistance', 'drought_resistance'}		8:22547184-22550740	Oryza sativa Japonica Group	known
LOC_Os08g39890	3	{'disease_resistance', 'grain_weight_increase', 'plant_height_reduce'}		8:25274449-25278696	Oryza sativa Japonica Group	known
LOC_Os08g41950	2	{'disease_resistance', 'plant_height_reduce'}		8:26507180-26512261	Oryza sativa Japonica Group	known
LOC_Os09g25850	2	{'salt_resistance', 'drought_resistance'}		9:15492998-15497524	Oryza sativa Japonica Group	known
LOC_Os09g26780	2	{'salt_resistance', 'drought_resistance'}		9:16273336-16275273	Oryza sativa Japonica Group	known
LOC_Os09g31430	2	{'disease_resistance', 'salt_resistance'}		9:18905324-18908427	Oryza sativa Japonica Group	known
LOC_Os09g35010	2	{'salt_resistance', 'drought_resistance'}		9:20395224-20396205	Oryza sativa Japonica Group	known
LOC_Os09g35030	2	{'salt_resistance', 'drought_resistance'}		9:20403149-20404332	Oryza sativa Japonica Group	known
LOC_Os10g33250	2	{'salt_resistance', 'drought_resistance'}		10:17448951-17454855	Oryza sativa Japonica Group	known
LOC_Os10g39810	2	{'disease_resistance', 'drought_resistance'}		10:21308453-21311416	Oryza sativa Japonica Group	known
LOC_Os10g42280	2	{'salt_resistance', 'drought_resistance'}		10:22766466-22767104	Oryza sativa Japonica Group	known
LOC_Os11g02240	3	{'disease_resistance', 'salt_resistance', 'drought_resistance'}		11:630580-633695	Oryza sativa Japonica Group	known
LOC_Os11g03370	5	{'grain_weight_increase', 'disease_resistance', 'drought_resistance', 'plant_height_reduce', 'salt_resistance'}		11:1269314-1271303	Oryza sativa Japonica Group	known
LOC_Os11g03970	3	{'disease_resistance', 'salt_resistance', 'drought_resistance'}		11:1603696-1609154	Oryza sativa Japonica Group	known
LOC_Os11g04170	2	{'disease_resistance', 'salt_resistance'}		11:1691861-1694301	Oryza sativa Japonica Group	known
LOC_Os11g04710	2	{'disease_resistance', 'grain_weight_increase'}		11:2006968-2010121	Oryza sativa Japonica Group	known
LOC_Os11g06720	3	{'disease_resistance', 'salt_resistance', 'drought_resistance'}		11:3278435-3279425	Oryza sativa Japonica Group	known
LOC_Os11g07040	2	{'disease_resistance', 'salt_resistance'}		11:3495218-3499974	Oryza sativa Japonica Group	known
LOC_Os11g08080	2	{'disease_resistance', 'drought_resistance'}		11:4220829-4229473	Oryza sativa Japonica Group	known
LOC_Os11g08210	4	{'disease_resistance', 'grain_weight_increase', 'salt_resistance', 'drought_resistance'}		11:4299149-4301783	Oryza sativa Japonica Group	known
LOC_Os11g10480	2	{'disease_resistance', 'salt_resistance'}		11:5712641-5716288	Oryza sativa Japonica Group	known
LOC_Os11g10510	2	{'disease_resistance', 'salt_resistance'}		11:5744961-5748152	Oryza sativa Japonica Group	known
LOC_Os11g13980	2	{'disease_resistance', 'salt_resistance'}		11:7750253-7751125	Oryza sativa Japonica Group	known
LOC_Os11g14900	3	{'disease_resistance', 'salt_resistance', 'drought_resistance'}		11:8379342-8382036	Oryza sativa Japonica Group	known
LOC_Os11g17080	3	{'disease_resistance', 'salt_resistance', 'drought_resistance'}		11:9471521-9479355	Oryza sativa Japonica Group	known
LOC_Os11g29400	3	{'disease_resistance', 'salt_resistance', 'drought_resistance'}		11:17064395-17066286	Oryza sativa Japonica Group	known
LOC_Os11g35030	3	{'disease_resistance', 'grain_weight_increase', 'plant_height_reduce'}		11:20521765-20525365	Oryza sativa Japonica Group	known
LOC_Os11g45740	4	{'disease_resistance', 'salt_resistance', 'insect_resistance', 'drought_resistance'}		11:27670321-27673334	Oryza sativa Japonica Group	known
LOC_Os11g47460	3	{'disease_resistance', 'salt_resistance', 'insect_resistance'}		11:28703899-28705306	Oryza sativa Japonica Group	known
LOC_Os11g47809	2	{'disease_resistance', 'salt_resistance'}		11:28827676-28828513	Oryza sativa Japonica Group	known
LOC_Os11g48020	2	{'disease_resistance', 'drought_resistance'}		11:28953907-28957199	Oryza sativa Japonica Group	known
LOC_Os11g48070	3	{'disease_resistance', 'salt_resistance', 'drought_resistance'}		11:28982944-28985763	Oryza sativa Japonica Group	known
LOC_Os12g02200	3	{'disease_resistance', 'salt_resistance', 'drought_resistance'}		12:679074-682269	Oryza sativa Japonica Group	known
LOC_Os12g02310	2	{'disease_resistance', 'salt_resistance'}		12:732978-734220	Oryza sativa Japonica Group	known
LOC_Os12g03050	4	{'disease_resistance', 'grain_weight_increase', 'salt_resistance', 'drought_resistance'}		12:1146995-1148742	Oryza sativa Japonica Group	known
LOC_Os12g03810	3	{'disease_resistance', 'salt_resistance', 'drought_resistance'}		12:1554888-1560308	Oryza sativa Japonica Group	known
LOC_Os12g03970	2	{'disease_resistance', 'salt_resistance'}		12:1648300-1650655	Oryza sativa Japonica Group	known
LOC_Os12g04480	2	{'disease_resistance', 'grain_weight_increase'}		12:1905848-1909152	Oryza sativa Japonica Group	known
LOC_Os12g06510	3	{'disease_resistance', 'salt_resistance', 'drought_resistance'}		12:3145028-3149567	Oryza sativa Japonica Group	known
LOC_Os12g07230	2	{'disease_resistance', 'salt_resistance'}		12:3553396-3558400	Oryza sativa Japonica Group	known
LOC_Os12g10520	2	{'disease_resistance', 'plant_height_reduce'}		12:5569433-5573026	Oryza sativa Japonica Group	known
LOC_Os12g10540	2	{'disease_resistance', 'plant_height_reduce'}		12:5584593-5590285	Oryza sativa Japonica Group	known
LOC_Os12g12860	2	{'disease_resistance', 'salt_resistance'}		12:7112286-7116204	Oryza sativa Japonica Group	known
LOC_Os12g16720	2	{'disease_resistance', 'salt_resistance'}		12:9579747-9582014	Oryza sativa Japonica Group	known
LOC_Os12g24800	3	{'disease_resistance', 'salt_resistance', 'drought_resistance'}		12:14232903-14234903	Oryza sativa Japonica Group	known
LOC_Os12g29980	3	{'disease_resistance', 'grain_weight_increase', 'plant_height_reduce'}		12:17915628-17919555	Oryza sativa Japonica Group	known
LOC_Os12g30150	2	{'disease_resistance', 'salt_resistance'}		12:18098675-18101837	Oryza sativa Japonica Group	known
LOC_Os12g31748	2	{'disease_resistance', 'plant_height_reduce'}		12:19106070-19115282	Oryza sativa Japonica Group	known
LOC_Os12g36890	3	{'disease_resistance', 'salt_resistance', 'drought_resistance'}		12:22602880-22607315	Oryza sativa Japonica Group	known
LOC_Os12g37970	3	{'disease_resistance', 'salt_resistance', 'insect_resistance'}		12:23325526-23327055	Oryza sativa Japonica Group	known
LOC_Os12g39630	3	{'disease_resistance', 'salt_resistance', 'drought_resistance'}		12:24458153-24462001	Oryza sativa Japonica Group	known
LOC_Os12g41860	2	{'disease_resistance', 'drought_resistance'}		12:25920639-25927353	Oryza sativa Japonica Group	known
LOC_Os12g42280	3	{'disease_resistance', 'salt_resistance', 'drought_resistance'}		12:26268230-26270794	Oryza sativa Japonica Group	known
LOC_Os12g43130	2	{'disease_resistance', 'salt_resistance'}		12:26780487-26783598	Oryza sativa Japonica Group	known
LOC_Os12g43340	2	{'disease_resistance', 'insect_resistance'}		12:26888763-26890254	Oryza sativa Japonica Group	known
TraesCS1A02G015800	2	{'salt_resistance', 'drought_resistance'}		1A:8320695-8322586	Triticum aestivum	known
TraesCS1A02G086500	3	{'disease_resistance', 'salt_resistance', 'drought_resistance'}	Mitogen-activated protein kinase [Source:UniProtKB/TrEMBL;Acc:W4ZYA7]	1A:73295476-73300550	Triticum aestivum	known
TraesCS1A02G115300	2	{'salt_resistance', 'drought_resistance'}	Phospholipase D [Source:UniProtKB/TrEMBL;Acc:A0A1D5S1U5]	1A:119709077-119718495	Triticum aestivum	known
TraesCS1A02G116200	3	{'disease_resistance', 'salt_resistance', 'drought_resistance'}	Cellulose synthase [Source:UniProtKB/TrEMBL;Acc:A0A1D5S222]	1A:121740032-121746242	Triticum aestivum	known
TraesCS1A02G125800	2	{'disease_resistance', 'plant_height_reduce'}	Similar to MADS box protein [Source: Projected from Oryza sativa (Os05g0203800)]	1A:150449784-150457057	Triticum aestivum	known
TraesCS1A02G126800	2	{'salt_resistance', 'drought_resistance'}		1A:153337577-153339354	Triticum aestivum	known
TraesCS1A02G157500	2	{'disease_resistance', 'drought_resistance'}		1A:279732251-279742732	Triticum aestivum	known
TraesCS1A02G183100	2	{'disease_resistance', 'insect_resistance'}		1A:331517066-331518993	Triticum aestivum	known
TraesCS1A02G184500	3	{'disease_resistance', 'salt_resistance', 'drought_resistance'}	Mitogen-activated protein kinase [Source:UniProtKB/TrEMBL;Acc:W4ZQS8]	1A:334446534-334452739	Triticum aestivum	known
TraesCS1A02G215900	3	{'disease_resistance', 'salt_resistance', 'drought_resistance'}	Serine/threonine protein kinase, Hyperosmotic stress respons [Source: Projected from Oryza sativa (Os10g0564500)]	1A:381819326-381822599	Triticum aestivum	known
TraesCS1A02G221900	2	{'salt_resistance', 'drought_resistance'}		1A:391256779-391260253	Triticum aestivum	known
TraesCS1A02G231200	2	{'salt_resistance', 'drought_resistance'}	Ethylene-responsive transcription factor RAP2-3 [Source:Projected from Arabidopsis thaliana (AT3G16770) UniProtKB/Swiss-Prot;Acc:P42736]	1A:403830277-403831326	Triticum aestivum	known
TraesCS1A02G261200	3	{'disease_resistance', 'salt_resistance', 'drought_resistance'}		1A:455605028-455607103	Triticum aestivum	known
TraesCS1A02G263700	3	{'disease_resistance', 'salt_resistance', 'drought_resistance'}		1A:459186662-459188632	Triticum aestivum	known
TraesCS1A02G270800	3	{'disease_resistance', 'salt_resistance', 'drought_resistance'}		1A:464837012-464840398	Triticum aestivum	known
TraesCS1A02G357200	3	{'disease_resistance', 'salt_resistance', 'drought_resistance'}	6-phosphogluconate dehydrogenase, decarboxylating [Source:UniProtKB/TrEMBL;Acc:A0A341NU59]	1A:539899281-539901954	Triticum aestivum	known
TraesCS1A02G370100	2	{'disease_resistance', 'salt_resistance'}		1A:547391832-547395833	Triticum aestivum	known
TraesCS1A02G370400	2	{'salt_resistance', 'drought_resistance'}		1A:547863784-547865124	Triticum aestivum	known
TraesCS1A02G370700	2	{'salt_resistance', 'drought_resistance'}		1A:547907223-547908642	Triticum aestivum	known
TraesCS1A02G423000	2	{'salt_resistance', 'drought_resistance'}		1A:578355283-578357056	Triticum aestivum	known
TraesCS1A02G424500	2	{'salt_resistance', 'drought_resistance'}		1A:579574092-579576186	Triticum aestivum	known
TraesCS1B02G018700	2	{'salt_resistance', 'drought_resistance'}		1B:8913933-8916204	Triticum aestivum	known
TraesCS1B02G019600	2	{'salt_resistance', 'drought_resistance'}		1B:9260224-9261405	Triticum aestivum	known
TraesCS1B02G033200	3	{'disease_resistance', 'salt_resistance', 'drought_resistance'}		1B:16216483-16217635	Triticum aestivum	known
TraesCS1B02G104900	3	{'disease_resistance', 'salt_resistance', 'drought_resistance'}	Mitogen-activated protein kinase [Source:UniProtKB/TrEMBL;Acc:A9RAB0]	1B:115953191-115959231	Triticum aestivum	known
TraesCS1B02G144800	2	{'disease_resistance', 'plant_height_reduce'}	Similar to MADS box protein [Source: Projected from Oryza sativa (Os05g0203800)]	1B:198145270-198154010	Triticum aestivum	known
TraesCS1B02G145800	2	{'salt_resistance', 'drought_resistance'}		1B:200298101-200300611	Triticum aestivum	known
TraesCS1B02G173900	2	{'disease_resistance', 'drought_resistance'}		1B:311418203-311428280	Triticum aestivum	known
TraesCS1B02G192600	3	{'disease_resistance', 'salt_resistance', 'drought_resistance'}	Mitogen-activated protein kinase [Source:UniProtKB/TrEMBL;Acc:W5A5U1]	1B:344838254-344842121	Triticum aestivum	known
TraesCS1B02G195200	2	{'salt_resistance', 'drought_resistance'}	Phospholipase D [Source:UniProtKB/TrEMBL;Acc:A0A341P3B7]	1B:350391339-350397150	Triticum aestivum	known
TraesCS1B02G229400	3	{'disease_resistance', 'salt_resistance', 'drought_resistance'}	Serine/threonine protein kinase, Hyperosmotic stress respons [Source: Projected from Oryza sativa (Os10g0564500)]	1B:411987863-411990884	Triticum aestivum	known
TraesCS1B02G235100	2	{'salt_resistance', 'drought_resistance'}		1B:421096799-421100560	Triticum aestivum	known
TraesCS1B02G272000	3	{'disease_resistance', 'salt_resistance', 'drought_resistance'}		1B:478053587-478056331	Triticum aestivum	known
TraesCS1B02G274300	4	{'disease_resistance', 'grain_weight_increase', 'salt_resistance', 'drought_resistance'}		1B:481540499-481542564	Triticum aestivum	known
TraesCS1B02G281100	3	{'disease_resistance', 'salt_resistance', 'drought_resistance'}		1B:489249385-489253102	Triticum aestivum	known
TraesCS1B02G282300	2	{'salt_resistance', 'drought_resistance'}		1B:491231072-491233471	Triticum aestivum	known
TraesCS1B02G338500	3	{'disease_resistance', 'salt_resistance', 'drought_resistance'}	At1g09850 [Source:Projected from Arabidopsis thaliana (AT1G09850) UniProtKB/TrEMBL;Acc:Q0WVJ5]	1B:566601144-566605225	Triticum aestivum	known
TraesCS1B02G370500	3	{'disease_resistance', 'salt_resistance', 'drought_resistance'}		1B:600022470-600027569	Triticum aestivum	known
TraesCS1B02G370600	3	{'disease_resistance', 'salt_resistance', 'drought_resistance'}		1B:600258102-600259666	Triticum aestivum	known
TraesCS1B02G370900	3	{'disease_resistance', 'salt_resistance', 'drought_resistance'}		1B:600602485-600605276	Triticum aestivum	known
TraesCS1B02G373600	3	{'disease_resistance', 'salt_resistance', 'drought_resistance'}	6-phosphogluconate dehydrogenase, decarboxylating [Source:UniProtKB/TrEMBL;Acc:A0A1D5SCW4]	1B:604146347-604148271	Triticum aestivum	known
TraesCS1B02G388600	2	{'salt_resistance', 'drought_resistance'}		1B:622365197-622366979	Triticum aestivum	known
TraesCS1B02G434300	3	{'disease_resistance', 'salt_resistance', 'drought_resistance'}		1B:658908133-658910735	Triticum aestivum	known
TraesCS1B02G456100	2	{'salt_resistance', 'drought_resistance'}		1B:670830897-670832994	Triticum aestivum	known
TraesCS1B02G456500	2	{'salt_resistance', 'drought_resistance'}		1B:670956584-670958739	Triticum aestivum	known
TraesCS1D02G013600	2	{'salt_resistance', 'drought_resistance'}		1D:6817464-6819186	Triticum aestivum	known
TraesCS1D02G052200	2	{'disease_resistance', 'salt_resistance'}		1D:33469805-33474180	Triticum aestivum	known
TraesCS1D02G088000	3	{'disease_resistance', 'salt_resistance', 'drought_resistance'}	Mitogen-activated protein kinase [Source:UniProtKB/TrEMBL;Acc:A0A341PG17]	1D:73674523-73680096	Triticum aestivum	known
TraesCS1D02G126900	2	{'salt_resistance', 'drought_resistance'}		1D:138782298-138784796	Triticum aestivum	known
TraesCS1D02G127700	2	{'disease_resistance', 'plant_height_reduce'}	Similar to MADS box protein [Source: Projected from Oryza sativa (Os05g0203800)]	1D:140519109-140526837	Triticum aestivum	known
TraesCS1D02G147800	2	{'salt_resistance', 'drought_resistance'}		1D:203866615-203874177	Triticum aestivum	known
TraesCS1D02G155200	2	{'disease_resistance', 'drought_resistance'}		1D:217635210-217645127	Triticum aestivum	known
TraesCS1D02G218200	3	{'disease_resistance', 'salt_resistance', 'drought_resistance'}	Serine/threonine protein kinase, Hyperosmotic stress respons [Source: Projected from Oryza sativa (Os10g0564500)]	1D:304838300-304841343	Triticum aestivum	known
TraesCS1D02G230900	2	{'salt_resistance', 'drought_resistance'}	Ethylene-responsive transcription factor RAP2-3 [Source:Projected from Arabidopsis thaliana (AT3G16770) UniProtKB/Swiss-Prot;Acc:P42736]	1D:319429401-319430475	Triticum aestivum	known
TraesCS1D02G261200	3	{'disease_resistance', 'salt_resistance', 'drought_resistance'}	Calcineurin B-like protein 7-1 [Source:UniProtKB/TrEMBL;Acc:V9LSK5]	1D:355429375-355431804	Triticum aestivum	known
TraesCS1D02G263800	3	{'disease_resistance', 'salt_resistance', 'drought_resistance'}		1D:359664637-359666117	Triticum aestivum	known
TraesCS1D02G271000	3	{'disease_resistance', 'salt_resistance', 'drought_resistance'}		1D:365727612-365731332	Triticum aestivum	known
TraesCS1D02G346400	3	{'disease_resistance', 'salt_resistance', 'drought_resistance'}		1D:433968991-433981506	Triticum aestivum	known
TraesCS1D02G358400	3	{'disease_resistance', 'salt_resistance', 'drought_resistance'}	Calcineurin B-like protein 4 [Source:UniProtKB/TrEMBL;Acc:V9LSA1]	1D:442050271-442052467	Triticum aestivum	known
TraesCS1D02G376600	2	{'salt_resistance', 'drought_resistance'}		1D:453181576-453182804	Triticum aestivum	known
TraesCS1D02G376800	2	{'salt_resistance', 'drought_resistance'}		1D:453209874-453211347	Triticum aestivum	known
TraesCS1D02G381800	2	{'disease_resistance', 'drought_resistance'}		1D:457069625-457074809	Triticum aestivum	known
TraesCS1D02G432500	2	{'salt_resistance', 'drought_resistance'}		1D:482232612-482234538	Triticum aestivum	known
TraesCS1D02G432800	2	{'salt_resistance', 'drought_resistance'}		1D:482323410-482325772	Triticum aestivum	known
TraesCS1D02G432900	2	{'salt_resistance', 'drought_resistance'}		1D:482369220-482371775	Triticum aestivum	known
TraesCS1D02G433100	2	{'salt_resistance', 'drought_resistance'}		1D:482491189-482493374	Triticum aestivum	known
TraesCS1D02G433200	2	{'salt_resistance', 'drought_resistance'}		1D:482515174-482517590	Triticum aestivum	known
TraesCS2A02G000400	3	{'disease_resistance', 'salt_resistance', 'drought_resistance'}		2A:278821-289215	Triticum aestivum	known
TraesCS2A02G026600	2	{'salt_resistance', 'drought_resistance'}		2A:12287484-12289174	Triticum aestivum	known
TraesCS2A02G101900	3	{'disease_resistance', 'salt_resistance', 'drought_resistance'}		2A:54882252-54884230	Triticum aestivum	known
TraesCS2A02G102000	3	{'disease_resistance', 'salt_resistance', 'drought_resistance'}	NAC transcription factor 29 [Source:UniProtKB/TrEMBL;Acc:A0A140F1N9]	2A:54953678-54955663	Triticum aestivum	known
TraesCS2A02G163000	2	{'salt_resistance', 'insect_resistance'}		2A:115413507-115422090	Triticum aestivum	known
TraesCS2A02G174300	2	{'disease_resistance', 'plant_height_reduce'}	APETALA1 (AP1)/ FRUITFULL (FUL)-like MADS box transcription factor, Specification of inflorescence meristem identit [Source: Projected from Oryza sativa (Os07g0605200)]	2A:132859503-132876621	Triticum aestivum	known
TraesCS2A02G201800	5	{'grain_weight_increase', 'disease_resistance', 'drought_resistance', 'plant_height_reduce', 'salt_resistance'}		2A:175467301-175470007	Triticum aestivum	known
TraesCS2A02G227300	2	{'disease_resistance', 'insect_resistance'}		2A:239381406-239386945	Triticum aestivum	known
TraesCS2A02G229400	2	{'salt_resistance', 'insect_resistance'}		2A:258345594-258361280	Triticum aestivum	known
TraesCS2A02G288000	3	{'disease_resistance', 'salt_resistance', 'drought_resistance'}	Rap2.6L [Source:Projected from Arabidopsis thaliana (AT5G13330) UniProtKB/TrEMBL;Acc:A0A178UKL8]	2A:493832187-493834351	Triticum aestivum	known
TraesCS2A02G312900	2	{'disease_resistance', 'salt_resistance'}		2A:537456017-537457024	Triticum aestivum	known
TraesCS2A02G337900	2	{'disease_resistance', 'plant_height_reduce'}	MIKC-type MADS-box transcription factor WM30 [Source:UniProtKB/TrEMBL;Acc:A9J228]	2A:572054907-572068800	Triticum aestivum	known
TraesCS2A02G343100	2	{'disease_resistance', 'grain_weight_increase'}	Somatic embryogenesis receptor kinase 1 [Source:UniProtKB/TrEMBL;Acc:G4XGX1]	2A:580017609-580023752	Triticum aestivum	known
TraesCS2A02G385100	2	{'salt_resistance', 'drought_resistance'}		2A:631530198-631533992	Triticum aestivum	known
TraesCS2A02G399900	2	{'disease_resistance', 'drought_resistance'}	Protein DETOXIFICATION [Source:UniProtKB/TrEMBL;Acc:A0A341QAG4]	2A:652999871-653002090	Triticum aestivum	known
TraesCS2A02G410700	2	{'disease_resistance', 'insect_resistance'}		2A:668242515-668243490	Triticum aestivum	known
TraesCS2A02G435100	3	{'disease_resistance', 'grain_weight_increase', 'plant_height_reduce'}	Growth regulating factor 4-A1 [Source:UniProtKB/TrEMBL;Acc:A0A1D5TE71]	2A:687048698-687052485	Triticum aestivum	known
TraesCS2A02G451300	2	{'salt_resistance', 'drought_resistance'}		2A:700954858-700962731	Triticum aestivum	known
TraesCS2A02G456100	2	{'disease_resistance', 'salt_resistance'}		2A:704772997-704777010	Triticum aestivum	known
TraesCS2A02G493800	3	{'disease_resistance', 'salt_resistance', 'drought_resistance'}	Serine/threonine protein kinase, Hyperosmotic stress respons [Source: Projected from Oryza sativa (Os03g0390200)]	2A:726029783-726034011	Triticum aestivum	known
TraesCS2A02G500400	2	{'grain_weight_increase', 'plant_height_reduce'}	Glutamine synthetase [Source:UniProtKB/TrEMBL;Acc:Q45NB2]	2A:729293649-729297303	Triticum aestivum	known
TraesCS2A02G563400	2	{'disease_resistance', 'insect_resistance'}		2A:764089317-764095873	Triticum aestivum	known
TraesCS2A02G564700	2	{'disease_resistance', 'drought_resistance'}		2A:764770326-764777742	Triticum aestivum	known
TraesCS2B02G023600	3	{'disease_resistance', 'salt_resistance', 'drought_resistance'}		2B:11006768-11011894	Triticum aestivum	known
TraesCS2B02G047400	2	{'disease_resistance', 'salt_resistance'}	Heat shock protein 90 [Source:UniProtKB/TrEMBL;Acc:F4Y590]	2B:23580386-23583637	Triticum aestivum	known
TraesCS2B02G105300	2	{'salt_resistance', 'drought_resistance'}		2B:65882338-65883681	Triticum aestivum	known
TraesCS2B02G114000	3	{'disease_resistance', 'salt_resistance', 'drought_resistance'}	Non-specific serine/threonine protein kinase [Source:UniProtKB/TrEMBL;Acc:A0A341QGG1]	2B:77173187-77177473	Triticum aestivum	known
TraesCS2B02G119000	3	{'disease_resistance', 'salt_resistance', 'drought_resistance'}		2B:85073785-85076011	Triticum aestivum	known
TraesCS2B02G119100	3	{'disease_resistance', 'salt_resistance', 'drought_resistance'}		2B:85175914-85178065	Triticum aestivum	known
TraesCS2B02G123900	3	{'disease_resistance', 'salt_resistance', 'drought_resistance'}	Non-specific serine/threonine protein kinase [Source:UniProtKB/TrEMBL;Acc:W5BI44]	2B:91835047-91838422	Triticum aestivum	known
TraesCS2B02G187500	3	{'disease_resistance', 'salt_resistance', 'drought_resistance'}	WRKY transcription factor WRKY1A [Source:UniProtKB/TrEMBL;Acc:A7X9Y3]	2B:162872445-162873846	Triticum aestivum	known
TraesCS2B02G188800	2	{'salt_resistance', 'insect_resistance'}		2B:164418775-164427330	Triticum aestivum	known
TraesCS2B02G189600	3	{'disease_resistance', 'salt_resistance', 'drought_resistance'}	Serine/threonine protein kinase, Hyperosmotic stress response, Abscisic acid (ABA)-dependent gene regulatio [Source: Projected from Oryza sativa (Os07g0622000)]	2B:165115341-165119793	Triticum aestivum	known
TraesCS2B02G200800	2	{'disease_resistance', 'plant_height_reduce'}	MADS2 [Source:UniProtKB/TrEMBL;Acc:A5X498]	2B:180040838-180060077	Triticum aestivum	known
TraesCS2B02G227000	2	{'disease_resistance', 'salt_resistance'}		2B:217789831-217793781	Triticum aestivum	known
TraesCS2B02G228900	5	{'grain_weight_increase', 'disease_resistance', 'drought_resistance', 'plant_height_reduce', 'salt_resistance'}	Similar to NAC domain protein [Source: Projected from Oryza sativa (Os07g0566500)]	2B:223153810-223156266	Triticum aestivum	known
TraesCS2B02G255200	2	{'disease_resistance', 'insect_resistance'}		2B:290519507-290523695	Triticum aestivum	known
TraesCS2B02G281000	2	{'disease_resistance', 'plant_height_reduce'}		2B:387698476-387705670	Triticum aestivum	known
TraesCS2B02G300800	2	{'salt_resistance', 'insect_resistance'}		2B:423657597-423666571	Triticum aestivum	known
TraesCS2B02G340700	2	{'disease_resistance', 'grain_weight_increase'}		2B:486190984-486197028	Triticum aestivum	known
TraesCS2B02G388800	3	{'disease_resistance', 'salt_resistance', 'plant_height_reduce'}		2B:551633294-551635327	Triticum aestivum	known
TraesCS2B02G429500	2	{'disease_resistance', 'insect_resistance'}		2B:616934383-616935480	Triticum aestivum	known
TraesCS2B02G458400	3	{'disease_resistance', 'grain_weight_increase', 'plant_height_reduce'}	Growth regulating factor 4a-B1 [Source:UniProtKB/TrEMBL;Acc:A0A1D5U1P6]	2B:653016354-653019980	Triticum aestivum	known
TraesCS2B02G485600	2	{'salt_resistance', 'drought_resistance'}		2B:682848256-682860541	Triticum aestivum	known
TraesCS2B02G521800	3	{'disease_resistance', 'salt_resistance', 'drought_resistance'}	Serine/threonine protein kinase, Hyperosmotic stress respons [Source: Projected from Oryza sativa (Os03g0390200)]	2B:716809651-716816243	Triticum aestivum	known
TraesCS2B02G528300	2	{'grain_weight_increase', 'plant_height_reduce'}	Glutamine synthetase [Source:UniProtKB/TrEMBL;Acc:A0A1D5TVU1]	2B:722629776-722634436	Triticum aestivum	known
TraesCS2B02G536500	2	{'disease_resistance', 'drought_resistance'}		2B:732038730-732042160	Triticum aestivum	known
TraesCS2D02G000300	3	{'disease_resistance', 'salt_resistance', 'drought_resistance'}		2D:58039-62377	Triticum aestivum	known
TraesCS2D02G100700	5	{'grain_weight_increase', 'disease_resistance', 'drought_resistance', 'plant_height_reduce', 'salt_resistance'}		2D:52851898-52853720	Triticum aestivum	known
TraesCS2D02G101400	3	{'disease_resistance', 'salt_resistance', 'drought_resistance'}		2D:54486128-54488083	Triticum aestivum	known
TraesCS2D02G137300	2	{'salt_resistance', 'plant_height_reduce'}		2D:80819400-80821614	Triticum aestivum	known
TraesCS2D02G169900	2	{'salt_resistance', 'insect_resistance'}		2D:113911362-113919591	Triticum aestivum	known
TraesCS2D02G181400	2	{'disease_resistance', 'plant_height_reduce'}	APETALA1 (AP1)/ FRUITFULL (FUL)-like MADS box transcription factor, Specification of inflorescence meristem identit [Source: Projected from Oryza sativa (Os07g0605200)]	2D:126124950-126149743	Triticum aestivum	known
TraesCS2D02G214100	4	{'disease_resistance', 'grain_weight_increase', 'salt_resistance', 'drought_resistance'}		2D:175330859-175333525	Triticum aestivum	known
TraesCS2D02G229100	2	{'disease_resistance', 'salt_resistance'}		2D:198459343-198463234	Triticum aestivum	known
TraesCS2D02G235200	2	{'disease_resistance', 'insect_resistance'}		2D:220670605-220675415	Triticum aestivum	known
TraesCS2D02G237300	2	{'salt_resistance', 'insect_resistance'}		2D:239973005-239987968	Triticum aestivum	known
TraesCS2D02G246600	3	{'disease_resistance', 'grain_weight_increase', 'plant_height_reduce'}	Growth regulating factor 8-D1 [Source:UniProtKB/TrEMBL;Acc:W5BS70]	2D:288225741-288228187	Triticum aestivum	known
TraesCS2D02G286300	3	{'disease_resistance', 'salt_resistance', 'drought_resistance'}	Rap2.6L [Source:Projected from Arabidopsis thaliana (AT5G13330) UniProtKB/TrEMBL;Acc:A0A178UKL8]	2D:365778049-365782480	Triticum aestivum	known
TraesCS2D02G321400	2	{'disease_resistance', 'grain_weight_increase'}		2D:412833158-412839366	Triticum aestivum	known
TraesCS2D02G324700	5	{'grain_weight_increase', 'disease_resistance', 'drought_resistance', 'plant_height_reduce', 'salt_resistance'}	RNAC1 transcription factor [Source:UniProtKB/TrEMBL;Acc:A0A1D5UHY0]	2D:417543627-417545330	Triticum aestivum	known
TraesCS2D02G408100	2	{'disease_resistance', 'insect_resistance'}		2D:523028514-523029011	Triticum aestivum	known
TraesCS2D02G414300	3	{'disease_resistance', 'salt_resistance', 'drought_resistance'}		2D:528472502-528473867	Triticum aestivum	known
TraesCS2D02G414600	3	{'disease_resistance', 'salt_resistance', 'drought_resistance'}		2D:528635190-528637621	Triticum aestivum	known
TraesCS2D02G435200	3	{'disease_resistance', 'grain_weight_increase', 'plant_height_reduce'}	Growth regulating factor 4-D1 [Source:UniProtKB/TrEMBL;Acc:A0A1D5UNL9]	2D:546208318-546212200	Triticum aestivum	known
TraesCS2D02G489700	3	{'disease_resistance', 'salt_resistance', 'drought_resistance'}	WRKY45-like transcription factor [Source:UniProtKB/TrEMBL;Acc:F8WPI9]	2D:588676152-588677693	Triticum aestivum	known
TraesCS2D02G507200	2	{'salt_resistance', 'drought_resistance'}		2D:600975869-600981018	Triticum aestivum	known
TraesCS2D02G509500	2	{'disease_resistance', 'drought_resistance'}		2D:601963045-601971739	Triticum aestivum	known
TraesCS2D02G511300	2	{'disease_resistance', 'drought_resistance'}		2D:602739787-602775064	Triticum aestivum	known
TraesCS2D02G517200	2	{'salt_resistance', 'drought_resistance'}	Glycerol kinase [Source:Projected from Arabidopsis thaliana (AT1G80460) UniProtKB/Swiss-Prot;Acc:Q9M8L4]	2D:608196430-608200931	Triticum aestivum	known
TraesCS2D02G534400	2	{'disease_resistance', 'salt_resistance'}	Serine/threonine-protein kinase [Source:UniProtKB/TrEMBL;Acc:A0A1D5UH93]	2D:618138520-618143248	Triticum aestivum	known
TraesCS2D02G572000	2	{'disease_resistance', 'insect_resistance'}		2D:638143208-638148768	Triticum aestivum	known
TraesCS2D02G577000	3	{'disease_resistance', 'salt_resistance', 'drought_resistance'}	Serine/threonine protein kinase, Hyperosmotic stress respons [Source: Projected from Oryza sativa (Os04g0691100)]	2D:640297481-640299386	Triticum aestivum	known
TraesCS3A02G033400	2	{'disease_resistance', 'drought_resistance'}		3A:19275574-19307908	Triticum aestivum	known
TraesCS3A02G034300	2	{'disease_resistance', 'drought_resistance'}		3A:19342872-19374762	Triticum aestivum	known
TraesCS3A02G034500	2	{'disease_resistance', 'salt_resistance'}		3A:19466928-19467669	Triticum aestivum	known
TraesCS3A02G034600	2	{'disease_resistance', 'drought_resistance'}		3A:19471388-19506635	Triticum aestivum	known
TraesCS3A02G077900	4	{'disease_resistance', 'salt_resistance', 'plant_height_reduce', 'drought_resistance'}		3A:50382036-50384496	Triticum aestivum	known
TraesCS3A02G078400	4	{'disease_resistance', 'grain_weight_increase', 'salt_resistance', 'drought_resistance'}	NAC transcription factor 47 [Source:Projected from Arabidopsis thaliana (AT3G04070) UniProtKB/Swiss-Prot;Acc:Q84TD6]	3A:50726169-50728191	Triticum aestivum	known
TraesCS3A02G105400	2	{'disease_resistance', 'insect_resistance'}		3A:69290641-69294697	Triticum aestivum	known
TraesCS3A02G129000	2	{'salt_resistance', 'drought_resistance'}		3A:106434735-106441161	Triticum aestivum	known
TraesCS3A02G151400	2	{'salt_resistance', 'drought_resistance'}		3A:140805091-140807759	Triticum aestivum	known
TraesCS3A02G228000	3	{'disease_resistance', 'salt_resistance', 'drought_resistance'}	Mitogen-activated protein kinase [Source:UniProtKB/TrEMBL;Acc:A0A0K0YGT2]	3A:426864124-426872913	Triticum aestivum	known
TraesCS3A02G233000	3	{'grain_weight_increase', 'salt_resistance', 'plant_height_reduce'}		3A:434949642-434951603	Triticum aestivum	known
TraesCS3A02G242100	3	{'disease_resistance', 'salt_resistance', 'drought_resistance'}	Mitogen-activated protein kinase [Source:UniProtKB/TrEMBL;Acc:A0A1D5VAB1]	3A:454510686-454516596	Triticum aestivum	known
TraesCS3A02G262100	2	{'disease_resistance', 'drought_resistance'}		3A:484990152-485011560	Triticum aestivum	known
TraesCS3A02G289900	3	{'disease_resistance', 'salt_resistance', 'drought_resistance'}		3A:518895097-518901097	Triticum aestivum	known
TraesCS3A02G314300	2	{'disease_resistance', 'plant_height_reduce'}	MADS-box transcription factor [Source:UniProtKB/TrEMBL;Acc:C0STS7]	3A:555035056-555042846	Triticum aestivum	known
TraesCS3A02G323500	2	{'disease_resistance', 'salt_resistance'}	Serine/threonine-protein kinase [Source:UniProtKB/TrEMBL;Acc:A0A1D5V5S0]	3A:568094977-568098215	Triticum aestivum	known
TraesCS3A02G339600	4	{'disease_resistance', 'grain_weight_increase', 'salt_resistance', 'drought_resistance'}	NAC transcription factor 4 [Source:UniProtKB/TrEMBL;Acc:D9HQE0]	3A:586421735-586423333	Triticum aestivum	known
TraesCS3A02G346100	3	{'disease_resistance', 'salt_resistance', 'drought_resistance'}	Non-specific serine/threonine protein kinase [Source:UniProtKB/TrEMBL;Acc:W5CDF9]	3A:595433942-595436796	Triticum aestivum	known
TraesCS3A02G348400	2	{'salt_resistance', 'drought_resistance'}		3A:597184234-597184854	Triticum aestivum	known
TraesCS3A02G371800	2	{'salt_resistance', 'drought_resistance'}	ABA response element binding factor [Source:UniProtKB/TrEMBL;Acc:Q8LK78]	3A:622277558-622279313	Triticum aestivum	known
TraesCS3A02G406000	4	{'disease_resistance', 'grain_weight_increase', 'salt_resistance', 'drought_resistance'}	NAC transcription factor 6A [Source:UniProtKB/TrEMBL;Acc:F6GSE5]	3A:650056057-650058213	Triticum aestivum	known
TraesCS3A02G412900	3	{'disease_resistance', 'salt_resistance', 'drought_resistance'}		3A:656134715-656136310	Triticum aestivum	known
TraesCS3A02G413200	3	{'disease_resistance', 'salt_resistance', 'drought_resistance'}		3A:656423849-656425275	Triticum aestivum	known
TraesCS3A02G433300	2	{'salt_resistance', 'insect_resistance'}		3A:674751244-674757428	Triticum aestivum	known
TraesCS3B02G049800	2	{'disease_resistance', 'salt_resistance'}		3B:25056254-25057165	Triticum aestivum	known
TraesCS3B02G092800	5	{'grain_weight_increase', 'disease_resistance', 'drought_resistance', 'plant_height_reduce', 'salt_resistance'}		3B:61895861-61896952	Triticum aestivum	known
TraesCS3B02G092900	5	{'grain_weight_increase', 'disease_resistance', 'drought_resistance', 'plant_height_reduce', 'salt_resistance'}		3B:61914874-61916355	Triticum aestivum	known
TraesCS3B02G093300	4	{'disease_resistance', 'grain_weight_increase', 'salt_resistance', 'drought_resistance'}	NAC transcription factor 47 [Source:Projected from Arabidopsis thaliana (AT3G04070) UniProtKB/Swiss-Prot;Acc:Q84TD6]	3B:62313202-62315456	Triticum aestivum	known
TraesCS3B02G110900	2	{'salt_resistance', 'drought_resistance'}		3B:76506118-76514915	Triticum aestivum	known
TraesCS3B02G123800	2	{'disease_resistance', 'insect_resistance'}	Regulatory protein NPR1 [Source:Projected from Arabidopsis thaliana (AT1G64280) UniProtKB/Swiss-Prot;Acc:P93002]	3B:96812311-96816428	Triticum aestivum	known
TraesCS3B02G149100	2	{'salt_resistance', 'drought_resistance'}	Phospholipase D [Source:UniProtKB/TrEMBL;Acc:W5D4Q6]	3B:140486708-140490890	Triticum aestivum	known
TraesCS3B02G157500	2	{'disease_resistance', 'plant_height_reduce'}		3B:151443948-151451582	Triticum aestivum	known
TraesCS3B02G178600	2	{'salt_resistance', 'drought_resistance'}		3B:183073614-183084845	Triticum aestivum	known
TraesCS3B02G194000	4	{'disease_resistance', 'grain_weight_increase', 'salt_resistance', 'drought_resistance'}		3B:214284139-214285430	Triticum aestivum	known
TraesCS3B02G256700	3	{'disease_resistance', 'salt_resistance', 'drought_resistance'}		3B:414020367-414026235	Triticum aestivum	known
TraesCS3B02G260900	3	{'disease_resistance', 'salt_resistance', 'drought_resistance'}	Mitogen-activated protein kinase [Source:UniProtKB/TrEMBL;Acc:A0A1D5VVK3]	3B:418887290-418898340	Triticum aestivum	known
TraesCS3B02G270200	3	{'disease_resistance', 'salt_resistance', 'drought_resistance'}	Mitogen-activated protein kinase [Source:UniProtKB/TrEMBL;Acc:A0A077RTL3]	3B:434980667-434986997	Triticum aestivum	known
TraesCS3B02G295400	2	{'disease_resistance', 'drought_resistance'}		3B:474002444-474028365	Triticum aestivum	known
TraesCS3B02G337700	2	{'disease_resistance', 'insect_resistance'}		3B:544108681-544112656	Triticum aestivum	known
TraesCS3B02G338800	3	{'disease_resistance', 'salt_resistance', 'plant_height_reduce'}		3B:545048539-545050613	Triticum aestivum	known
TraesCS3B02G338900	2	{'salt_resistance', 'plant_height_reduce'}		3B:545061480-545063744	Triticum aestivum	known
TraesCS3B02G358200	2	{'disease_resistance', 'salt_resistance'}		3B:571019940-571024010	Triticum aestivum	known
TraesCS3B02G371200	3	{'disease_resistance', 'salt_resistance', 'drought_resistance'}		3B:583391548-583393126	Triticum aestivum	known
TraesCS3B02G377800	3	{'disease_resistance', 'salt_resistance', 'drought_resistance'}	Non-specific serine/threonine protein kinase [Source:UniProtKB/TrEMBL;Acc:A0A1D5VQE9]	3B:595287750-595290341	Triticum aestivum	known
TraesCS3B02G383800	2	{'disease_resistance', 'salt_resistance'}		3B:603601410-603608014	Triticum aestivum	known
TraesCS3B02G404300	2	{'salt_resistance', 'drought_resistance'}		3B:639149389-639151199	Triticum aestivum	known
TraesCS3B02G404400	2	{'salt_resistance', 'drought_resistance'}		3B:639399151-639401892	Triticum aestivum	known
TraesCS3B02G404600	2	{'salt_resistance', 'drought_resistance'}		3B:639752637-639756075	Triticum aestivum	known
TraesCS3B02G439600	4	{'disease_resistance', 'grain_weight_increase', 'salt_resistance', 'drought_resistance'}	NAC transcription factor 6B [Source:UniProtKB/TrEMBL;Acc:D7R600]	3B:678548127-678550377	Triticum aestivum	known
TraesCS3B02G469100	2	{'salt_resistance', 'insect_resistance'}		3B:715886740-715893072	Triticum aestivum	known
TraesCS3B02G586500	2	{'disease_resistance', 'grain_weight_increase'}		3B:812816839-812822996	Triticum aestivum	known
TraesCS3D02G017800	2	{'salt_resistance', 'drought_resistance'}		3D:6021794-6023847	Triticum aestivum	known
TraesCS3D02G046000	2	{'disease_resistance', 'drought_resistance'}		3D:17513600-17538118	Triticum aestivum	known
TraesCS3D02G046900	2	{'disease_resistance', 'drought_resistance'}		3D:17642214-17670884	Triticum aestivum	known
TraesCS3D02G078500	5	{'grain_weight_increase', 'disease_resistance', 'drought_resistance', 'plant_height_reduce', 'salt_resistance'}		3D:39031899-39032935	Triticum aestivum	known
TraesCS3D02G078900	4	{'disease_resistance', 'grain_weight_increase', 'salt_resistance', 'drought_resistance'}	NAC transcription factor [Source:UniProtKB/TrEMBL;Acc:D7R5Z9]	3D:39324084-39326004	Triticum aestivum	known
TraesCS3D02G107500	2	{'disease_resistance', 'insect_resistance'}		3D:61072307-61076336	Triticum aestivum	known
TraesCS3D02G113300	3	{'disease_resistance', 'salt_resistance', 'drought_resistance'}		3D:67458412-67461164	Triticum aestivum	known
TraesCS3D02G140200	2	{'disease_resistance', 'plant_height_reduce'}	WAG-2m MADS box transcription factor [Source:UniProtKB/TrEMBL;Acc:A0A0S1W603]	3D:100852964-100860857	Triticum aestivum	known
TraesCS3D02G148600	2	{'salt_resistance', 'insect_resistance'}		3D:113797775-113802415	Triticum aestivum	known
TraesCS3D02G159600	2	{'salt_resistance', 'drought_resistance'}		3D:129024099-129026885	Triticum aestivum	known
TraesCS3D02G225600	3	{'disease_resistance', 'salt_resistance', 'drought_resistance'}	Mitogen-activated protein kinase [Source:UniProtKB/TrEMBL;Acc:A0A1D6RTD5]	3D:307226730-307233549	Triticum aestivum	known
TraesCS3D02G246500	2	{'disease_resistance', 'grain_weight_increase'}		3D:344337925-344342369	Triticum aestivum	known
TraesCS3D02G262200	2	{'disease_resistance', 'drought_resistance'}		3D:363855681-363868487	Triticum aestivum	known
TraesCS3D02G333100	4	{'disease_resistance', 'grain_weight_increase', 'salt_resistance', 'drought_resistance'}		3D:445036912-445038669	Triticum aestivum	known
TraesCS3D02G339800	3	{'disease_resistance', 'salt_resistance', 'drought_resistance'}	Non-specific serine/threonine protein kinase [Source:UniProtKB/TrEMBL;Acc:W5DDN9]	3D:453096508-453099107	Triticum aestivum	known
TraesCS3D02G364900	2	{'salt_resistance', 'drought_resistance'}	BZip type transcription factor TaABI5 [Source:UniProtKB/TrEMBL;Acc:A0A7V3]	3D:478738607-478740450	Triticum aestivum	known
TraesCS3D02G401200	4	{'disease_resistance', 'grain_weight_increase', 'salt_resistance', 'drought_resistance'}	NAC transcription factor 6D [Source:UniProtKB/TrEMBL;Acc:F6GSE7]	3D:515776261-515778438	Triticum aestivum	known
TraesCS3D02G426700	2	{'salt_resistance', 'insect_resistance'}		3D:539903862-539910357	Triticum aestivum	known
TraesCS3D02G491400	3	{'disease_resistance', 'salt_resistance', 'drought_resistance'}	6-phosphogluconate dehydrogenase, decarboxylating [Source:UniProtKB/TrEMBL;Acc:A0A341TCZ4]	3D:585084630-585086355	Triticum aestivum	known
TraesCS4A02G028100	2	{'disease_resistance', 'plant_height_reduce'}		4A:19945824-19958177	Triticum aestivum	known
TraesCS4A02G029800	2	{'disease_resistance', 'drought_resistance'}		4A:21845172-21854022	Triticum aestivum	known
TraesCS4A02G063800	2	{'grain_weight_increase', 'plant_height_reduce'}	Glutamine synthetase [Source:UniProtKB/TrEMBL;Acc:A0A0C4BJG7]	4A:60668121-60671232	Triticum aestivum	known
TraesCS4A02G092100	2	{'disease_resistance', 'salt_resistance'}		4A:98785386-98787839	Triticum aestivum	known
TraesCS4A02G092700	2	{'disease_resistance', 'salt_resistance'}		4A:100102111-100102578	Triticum aestivum	known
TraesCS4A02G092900	2	{'disease_resistance', 'salt_resistance'}		4A:100550882-100551358	Triticum aestivum	known
TraesCS4A02G106400	3	{'disease_resistance', 'salt_resistance', 'drought_resistance'}	Mitogen-activated protein kinase [Source:UniProtKB/TrEMBL;Acc:A7L5U5]	4A:120604688-120608133	Triticum aestivum	known
TraesCS4A02G114400	2	{'salt_resistance', 'drought_resistance'}		4A:138832030-138833256	Triticum aestivum	known
TraesCS4A02G131000	4	{'disease_resistance', 'grain_weight_increase', 'salt_resistance', 'drought_resistance'}		4A:174155319-174157653	Triticum aestivum	known
TraesCS4A02G194800	3	{'disease_resistance', 'salt_resistance', 'drought_resistance'}	Non-specific serine/threonine protein kinase [Source:UniProtKB/TrEMBL;Acc:A0A341TIR6]	4A:476977837-476980583	Triticum aestivum	known
TraesCS4A02G202300	2	{'disease_resistance', 'salt_resistance'}	Alcohol dehydrogenase ADH2D [Source:UniProtKB/TrEMBL;Acc:A9U8G1]	4A:492029965-492032871	Triticum aestivum	known
TraesCS4A02G219700	4	{'disease_resistance', 'grain_weight_increase', 'salt_resistance', 'drought_resistance'}		4A:521917748-521920022	Triticum aestivum	known
TraesCS4A02G266900	2	{'grain_weight_increase', 'plant_height_reduce'}	Glutamine synthetase [Source:UniProtKB/TrEMBL;Acc:A0A1D5WYB9]	4A:579428158-579431177	Triticum aestivum	known
TraesCS4A02G271000	3	{'grain_weight_increase', 'salt_resistance', 'plant_height_reduce'}	RHT-A1 protein [Source:UniProtKB/TrEMBL;Acc:G9DDR9]	4A:582477351-582479578	Triticum aestivum	known
TraesCS4A02G275900	2	{'disease_resistance', 'insect_resistance'}	Lipoxygenase [Source:UniProtKB/TrEMBL;Acc:A0A1D5X2X1]	4A:584694118-584699911	Triticum aestivum	known
TraesCS4A02G347600	2	{'disease_resistance', 'drought_resistance'}		4A:625485636-625488601	Triticum aestivum	known
TraesCS4A02G391200	2	{'disease_resistance', 'drought_resistance'}		4A:668093684-668096362	Triticum aestivum	known
TraesCS4A02G396200	3	{'disease_resistance', 'salt_resistance', 'drought_resistance'}		4A:671522858-671527383	Triticum aestivum	known
TraesCS4B02G037700	2	{'disease_resistance', 'insect_resistance'}	Lipoxygenase [Source:UniProtKB/TrEMBL;Acc:A0A1D6RYF1]	4B:27248180-27252932	Triticum aestivum	known
TraesCS4B02G037800	2	{'disease_resistance', 'insect_resistance'}	Lipoxygenase [Source:UniProtKB/TrEMBL;Acc:W5EBU6]	4B:27395288-27401006	Triticum aestivum	known
TraesCS4B02G037900	2	{'disease_resistance', 'insect_resistance'}	Lipoxygenase [Source:UniProtKB/TrEMBL;Acc:X2D2V6]	4B:27518619-27523533	Triticum aestivum	known
TraesCS4B02G039500	3	{'disease_resistance', 'salt_resistance', 'drought_resistance'}		4B:28150495-28151669	Triticum aestivum	known
TraesCS4B02G043100	3	{'grain_weight_increase', 'salt_resistance', 'plant_height_reduce'}	DELLA protein [Source:UniProtKB/TrEMBL;Acc:G9DDS0]	4B:30861268-30863723	Triticum aestivum	known
TraesCS4B02G047400	2	{'grain_weight_increase', 'plant_height_reduce'}	Glutamine synthetase [Source:UniProtKB/TrEMBL;Acc:Q6RUI9]	4B:34722272-34725256	Triticum aestivum	known
TraesCS4B02G089800	2	{'disease_resistance', 'salt_resistance'}		4B:91184046-91184915	Triticum aestivum	known
TraesCS4B02G098200	4	{'disease_resistance', 'grain_weight_increase', 'salt_resistance', 'drought_resistance'}		4B:103054108-103056465	Triticum aestivum	known
TraesCS4B02G106400	2	{'disease_resistance', 'salt_resistance'}		4B:115845355-115848000	Triticum aestivum	known
TraesCS4B02G120400	3	{'disease_resistance', 'salt_resistance', 'drought_resistance'}	Non-specific serine/threonine protein kinase [Source:UniProtKB/TrEMBL;Acc:K4HME9]	4B:141427582-141428916	Triticum aestivum	known
TraesCS4B02G173600	4	{'disease_resistance', 'grain_weight_increase', 'salt_resistance', 'drought_resistance'}		4B:380653174-380655594	Triticum aestivum	known
TraesCS4B02G174000	4	{'disease_resistance', 'grain_weight_increase', 'salt_resistance', 'drought_resistance'}		4B:381373615-381375503	Triticum aestivum	known
TraesCS4B02G186900	2	{'disease_resistance', 'drought_resistance'}		4B:406890800-406893544	Triticum aestivum	known
TraesCS4B02G212300	2	{'disease_resistance', 'salt_resistance'}		4B:450685618-450686570	Triticum aestivum	known
TraesCS4B02G240900	2	{'grain_weight_increase', 'plant_height_reduce'}	Glutamine synthetase [Source:UniProtKB/TrEMBL;Acc:Q6RUJ2]	4B:499898695-499901767	Triticum aestivum	known
TraesCS4B02G245800	2	{'disease_resistance', 'plant_height_reduce'}		4B:508424673-508438095	Triticum aestivum	known
TraesCS4B02G299400	3	{'disease_resistance', 'salt_resistance', 'drought_resistance'}		4B:585821390-585823024	Triticum aestivum	known
TraesCS4B02G325800	2	{'salt_resistance', 'drought_resistance'}	Catalase [Source:UniProtKB/TrEMBL;Acc:A0A1D5XGM1]	4B:616987050-616991167	Triticum aestivum	known
TraesCS4B02G343800	2	{'salt_resistance', 'drought_resistance'}	MRP5 [Source:Projected from Arabidopsis thaliana (AT1G04120) UniProtKB/TrEMBL;Acc:A0A178WGC2]	4B:637389539-637396491	Triticum aestivum	known
TraesCS4B02G346700	2	{'disease_resistance', 'plant_height_reduce'}	MIKC-type MADS-box transcription factor WM21B [Source:UniProtKB/TrEMBL;Acc:A9J202]	4B:640289448-640303822	Triticum aestivum	known
TraesCS4B02G385200	2	{'disease_resistance', 'drought_resistance'}	Similar to cDNA clone:J033091P14, full insert sequence [Source: Projected from Oryza sativa (Os03g0109400)]	4B:664152217-664160567	Triticum aestivum	known
TraesCS4D02G027600	2	{'disease_resistance', 'salt_resistance'}		4D:12408039-12412107	Triticum aestivum	known
TraesCS4D02G036000	2	{'grain_weight_increase', 'salt_resistance'}		4D:16098177-16105037	Triticum aestivum	known
TraesCS4D02G040400	3	{'grain_weight_increase', 'salt_resistance', 'plant_height_reduce'}	DELLA protein RHT-1 [Source:UniProtKB/Swiss-Prot;Acc:Q9ST59]	4D:18781062-18782933	Triticum aestivum	known
TraesCS4D02G047400	2	{'grain_weight_increase', 'plant_height_reduce'}	Glutamine synthetase [Source:UniProtKB/TrEMBL;Acc:Q6RUJ0]	4D:22946578-22949866	Triticum aestivum	known
TraesCS4D02G086200	2	{'disease_resistance', 'salt_resistance'}		4D:61605044-61605987	Triticum aestivum	known
TraesCS4D02G094400	4	{'disease_resistance', 'grain_weight_increase', 'salt_resistance', 'drought_resistance'}		4D:69677974-69680281	Triticum aestivum	known
TraesCS4D02G107200	2	{'disease_resistance', 'salt_resistance'}		4D:85578813-85582953	Triticum aestivum	known
TraesCS4D02G118500	3	{'disease_resistance', 'salt_resistance', 'drought_resistance'}	Non-specific serine/threonine protein kinase [Source:UniProtKB/TrEMBL;Acc:W5ETB2]	4D:99161360-99162709	Triticum aestivum	known
TraesCS4D02G175700	4	{'disease_resistance', 'grain_weight_increase', 'salt_resistance', 'drought_resistance'}		4D:304689911-304692359	Triticum aestivum	known
TraesCS4D02G196100	2	{'salt_resistance', 'drought_resistance'}	Non-specific serine/threonine protein kinase [Source:UniProtKB/TrEMBL;Acc:A0A1D5Y4R6]	4D:340548384-340554595	Triticum aestivum	known
TraesCS4D02G198600	3	{'disease_resistance', 'salt_resistance', 'drought_resistance'}	Mitogen-activated protein kinase [Source:UniProtKB/TrEMBL;Acc:W5EFF0]	4D:344940376-344943564	Triticum aestivum	known
TraesCS4D02G212500	2	{'disease_resistance', 'salt_resistance'}		4D:365507056-365507896	Triticum aestivum	known
TraesCS4D02G240700	2	{'grain_weight_increase', 'plant_height_reduce'}	Glutamine synthetase [Source:UniProtKB/TrEMBL;Acc:Q6RUJ1]	4D:403145655-403148815	Triticum aestivum	known
TraesCS4D02G313400	3	{'disease_resistance', 'salt_resistance', 'drought_resistance'}		4D:479525172-479525540	Triticum aestivum	known
TraesCS4D02G322700	2	{'salt_resistance', 'drought_resistance'}	Catalase [Source:UniProtKB/TrEMBL;Acc:A0A1D5XZK3]	4D:484657637-484661134	Triticum aestivum	known
TraesCS4D02G341700	2	{'disease_resistance', 'plant_height_reduce'}	MIKC-type MADS-box transcription factor WM21A [Source:UniProtKB/TrEMBL;Acc:A4UXS0]	4D:498384057-498398217	Triticum aestivum	known
TraesCS4D02G359600	2	{'disease_resistance', 'drought_resistance'}	Similar to cDNA clone:J033091P14, full insert sequence [Source: Projected from Oryza sativa (Os03g0109400)]	4D:506967357-506975612	Triticum aestivum	known
TraesCS5A02G043400	2	{'disease_resistance', 'drought_resistance'}	Class III homeodomain-leucine zipper (HD-Zip III) protein, Age-dependent leaf senescenc [Source: Projected from Oryza sativa (Os12g0612700)]	5A:39845263-39851540	Triticum aestivum	known
TraesCS5A02G124700	3	{'disease_resistance', 'salt_resistance', 'drought_resistance'}	Calcineurin B-like protein 6 [Source:UniProtKB/TrEMBL;Acc:V9LSE3]	5A:273447474-273452738	Triticum aestivum	known
TraesCS5A02G143200	3	{'disease_resistance', 'salt_resistance', 'drought_resistance'}	NAC domain transcription factor [Source:UniProtKB/TrEMBL;Acc:Q4U0D4]	5A:317246617-317248367	Triticum aestivum	known
TraesCS5A02G183600	3	{'disease_resistance', 'salt_resistance', 'drought_resistance'}		5A:383418336-383419385	Triticum aestivum	known
TraesCS5A02G215900	2	{'salt_resistance', 'drought_resistance'}		5A:432033398-432036973	Triticum aestivum	known
TraesCS5A02G225500	3	{'disease_resistance', 'salt_resistance', 'drought_resistance'}	WRKY transcription factor, Transcriptional repressor, Pathogen defens [Source: Projected from Oryza sativa (Os09g0417800)]	5A:441112019-441113360	Triticum aestivum	known
TraesCS5A02G237200	2	{'salt_resistance', 'drought_resistance'}		5A:452933936-452937774	Triticum aestivum	known
TraesCS5A02G238400	2	{'salt_resistance', 'drought_resistance'}		5A:454732609-454733787	Triticum aestivum	known
TraesCS5A02G245900	4	{'disease_resistance', 'salt_resistance', 'plant_height_reduce', 'drought_resistance'}		5A:459002657-459004002	Triticum aestivum	known
TraesCS5A02G286800	2	{'disease_resistance', 'plant_height_reduce'}	MADS box protein [Source:UniProtKB/TrEMBL;Acc:Q718F3]	5A:494862838-494871118	Triticum aestivum	known
TraesCS5A02G295800	3	{'disease_resistance', 'salt_resistance', 'drought_resistance'}		5A:503950730-503952811	Triticum aestivum	known
TraesCS5A02G326100	2	{'salt_resistance', 'drought_resistance'}		5A:536677183-536680476	Triticum aestivum	known
TraesCS5A02G365800	3	{'disease_resistance', 'salt_resistance', 'drought_resistance'}		5A:565682325-565684319	Triticum aestivum	known
TraesCS5A02G374000	3	{'disease_resistance', 'salt_resistance', 'drought_resistance'}	9-cis-epoxycarotenoid dioxygenase 2A [Source:UniProtKB/TrEMBL;Acc:A0A1B3B582]	5A:572021504-572023279	Triticum aestivum	known
TraesCS5A02G375800	2	{'disease_resistance', 'drought_resistance'}		5A:573645407-573651009	Triticum aestivum	known
TraesCS5A02G378700	2	{'disease_resistance', 'insect_resistance'}		5A:575705509-575709396	Triticum aestivum	known
TraesCS5A02G378900	2	{'disease_resistance', 'insect_resistance'}	Lipoxygenase [Source:UniProtKB/TrEMBL;Acc:A0A1D5YBH2]	5A:576084594-576088278	Triticum aestivum	known
TraesCS5A02G391700	2	{'disease_resistance', 'plant_height_reduce'}	MIKC-type MADS-box transcription factor WM6 [Source:UniProtKB/TrEMBL;Acc:Q5ETV1]	5A:587411454-587423416	Triticum aestivum	known
TraesCS5A02G391800	2	{'disease_resistance', 'plant_height_reduce'}	AGLG1 [Source:UniProtKB/TrEMBL;Acc:M9PJT5]	5A:588017833-588024080	Triticum aestivum	known
TraesCS5A02G416100	2	{'disease_resistance', 'insect_resistance'}		5A:605100341-605103635	Triticum aestivum	known
TraesCS5A02G468300	4	{'disease_resistance', 'grain_weight_increase', 'salt_resistance', 'drought_resistance'}		5A:645726140-645727775	Triticum aestivum	known
TraesCS5A02G478500	2	{'disease_resistance', 'insect_resistance'}		5A:651826274-651827210	Triticum aestivum	known
TraesCS5A02G478800	2	{'disease_resistance', 'insect_resistance'}		5A:651858719-651859682	Triticum aestivum	known
TraesCS5A02G478900	2	{'disease_resistance', 'insect_resistance'}		5A:651982952-651984951	Triticum aestivum	known
TraesCS5A02G486100	2	{'disease_resistance', 'drought_resistance'}		5A:657191801-657195889	Triticum aestivum	known
TraesCS5A02G498000	2	{'salt_resistance', 'drought_resistance'}	Catalase [Source:UniProtKB/TrEMBL;Acc:A0A1D5YMQ8]	5A:665466057-665470666	Triticum aestivum	known
TraesCS5A02G515500	2	{'disease_resistance', 'plant_height_reduce'}		5A:678931797-678944519	Triticum aestivum	known
TraesCS5B02G029300	3	{'disease_resistance', 'salt_resistance', 'drought_resistance'}		5B:29337289-29339976	Triticum aestivum	known
TraesCS5B02G047200	2	{'disease_resistance', 'drought_resistance'}	Class III homeodomain-leucine zipper (HD-Zip III) protein, Age-dependent leaf senescenc [Source: Projected from Oryza sativa (Os12g0612700)]	5B:53246526-53252633	Triticum aestivum	known
TraesCS5B02G054200	5	{'grain_weight_increase', 'disease_resistance', 'drought_resistance', 'plant_height_reduce', 'salt_resistance'}	NAC transcription factor 6A [Source:UniProtKB/TrEMBL;Acc:A0A088AX61]	5B:59165228-59170277	Triticum aestivum	known
TraesCS5B02G059300	2	{'disease_resistance', 'salt_resistance'}	Non-specific serine/threonine protein kinase [Source:UniProtKB/TrEMBL;Acc:A0A341VB71]	5B:65277989-65279643	Triticum aestivum	known
TraesCS5B02G109300	2	{'disease_resistance', 'salt_resistance'}		5B:153468195-153504183	Triticum aestivum	known
TraesCS5B02G115100	2	{'disease_resistance', 'plant_height_reduce'}		5B:191029574-191038231	Triticum aestivum	known
TraesCS5B02G142100	3	{'disease_resistance', 'salt_resistance', 'drought_resistance'}	NAC domain transcription factor [Source:UniProtKB/TrEMBL;Acc:Q5DM36]	5B:267777723-267779485	Triticum aestivum	known
TraesCS5B02G182000	3	{'disease_resistance', 'salt_resistance', 'drought_resistance'}		5B:331373823-331375262	Triticum aestivum	known
TraesCS5B02G183700	3	{'disease_resistance', 'salt_resistance', 'drought_resistance'}		5B:334593379-334595279	Triticum aestivum	known
TraesCS5B02G214400	2	{'salt_resistance', 'drought_resistance'}	Ethylene responsive transcription factor 5a [Source:UniProtKB/TrEMBL;Acc:K4GPS6]	5B:387173279-387176604	Triticum aestivum	known
TraesCS5B02G236500	2	{'salt_resistance', 'drought_resistance'}	ABA 8'-hydroxylase [Source:UniProtKB/TrEMBL;Acc:T2HNE3]	5B:417549704-417552736	Triticum aestivum	known
TraesCS5B02G236900	3	{'disease_resistance', 'salt_resistance', 'drought_resistance'}		5B:417885840-417886872	Triticum aestivum	known
TraesCS5B02G286100	2	{'disease_resistance', 'plant_height_reduce'}		5B:471852224-471860110	Triticum aestivum	known
TraesCS5B02G358300	2	{'disease_resistance', 'salt_resistance'}		5B:537960131-537964109	Triticum aestivum	known
TraesCS5B02G378000	2	{'disease_resistance', 'drought_resistance'}		5B:556177355-556182834	Triticum aestivum	known
TraesCS5B02G382600	2	{'disease_resistance', 'insect_resistance'}	Lipoxygenase [Source:UniProtKB/TrEMBL;Acc:W5FF28]	5B:561061500-561065007	Triticum aestivum	known
TraesCS5B02G396600	2	{'disease_resistance', 'plant_height_reduce'}		5B:573802883-573816070	Triticum aestivum	known
TraesCS5B02G396700	2	{'disease_resistance', 'plant_height_reduce'}		5B:574055477-574061439	Triticum aestivum	known
TraesCS5B02G406400	3	{'disease_resistance', 'salt_resistance', 'drought_resistance'}	Sucrose non-fermenting-1-related protein kinase 2.8 [Source:UniProtKB/TrEMBL;Acc:W5F978]	5B:582578186-582584645	Triticum aestivum	known
TraesCS5B02G474500	2	{'disease_resistance', 'salt_resistance'}		5B:647940529-647944797	Triticum aestivum	known
TraesCS5B02G480900	4	{'disease_resistance', 'grain_weight_increase', 'salt_resistance', 'drought_resistance'}	NAC domain-containing protein 2a-like protein [Source:UniProtKB/TrEMBL;Acc:F8QMB6]	5B:653432387-653434033	Triticum aestivum	known
TraesCS5B02G491500	2	{'disease_resistance', 'insect_resistance'}		5B:659769899-659770854	Triticum aestivum	known
TraesCS5B02G491800	2	{'disease_resistance', 'insect_resistance'}		5B:659983832-659984917	Triticum aestivum	known
TraesCS5B02G521100	2	{'salt_resistance', 'insect_resistance'}		5B:683109213-683139863	Triticum aestivum	known
TraesCS5D02G038800	3	{'disease_resistance', 'salt_resistance', 'drought_resistance'}		5D:38723664-38726233	Triticum aestivum	known
TraesCS5D02G052300	2	{'disease_resistance', 'drought_resistance'}	Class III homeodomain-leucine zipper (HD-Zip III) protein, Age-dependent leaf senescenc [Source: Projected from Oryza sativa (Os12g0612700)]	5D:50483246-50488859	Triticum aestivum	known
TraesCS5D02G068700	2	{'disease_resistance', 'salt_resistance'}	Non-specific serine/threonine protein kinase [Source:UniProtKB/TrEMBL;Acc:A0A341W9Q6]	5D:65753632-65755248	Triticum aestivum	known
TraesCS5D02G072100	3	{'disease_resistance', 'salt_resistance', 'drought_resistance'}	Calcineurin B-like protein 2 [Source:UniProtKB/TrEMBL;Acc:V9LSG1]	5D:71886973-71892345	Triticum aestivum	known
TraesCS5D02G073900	2	{'disease_resistance', 'drought_resistance'}		5D:72901902-72907097	Triticum aestivum	known
TraesCS5D02G081700	3	{'disease_resistance', 'salt_resistance', 'drought_resistance'}	Serine/threonine protein kinase, Abscisic acid (ABA)-activated protein kinase, Hyperosmotic stress response, ABA signal transductio [Source: Projected from Oryza sativa (Os12g0586100)]	5D:82186877-82189457	Triticum aestivum	known
TraesCS5D02G091000	2	{'salt_resistance', 'plant_height_reduce'}	L-type lectin-domain containing receptor kinase S.4 [Source:Projected from Arabidopsis thaliana (AT3G55550) UniProtKB/Swiss-Prot;Acc:Q9M2S4]	5D:98227410-98230028	Triticum aestivum	known
TraesCS5D02G102600	3	{'disease_resistance', 'salt_resistance', 'drought_resistance'}	Cellulose synthase-like protein D5 [Source:Projected from Arabidopsis thaliana (AT1G02730) UniProtKB/Swiss-Prot;Acc:Q9SRW9]	5D:115947470-115952140	Triticum aestivum	known
TraesCS5D02G124000	2	{'disease_resistance', 'salt_resistance'}		5D:184872741-184896103	Triticum aestivum	known
TraesCS5D02G144800	3	{'disease_resistance', 'salt_resistance', 'drought_resistance'}	Non-specific serine/threonine protein kinase [Source:UniProtKB/TrEMBL;Acc:W5FT77]	5D:231350992-231353762	Triticum aestivum	known
TraesCS5D02G148800	2	{'disease_resistance', 'salt_resistance'}		5D:238066017-238067741	Triticum aestivum	known
TraesCS5D02G188600	3	{'disease_resistance', 'salt_resistance', 'drought_resistance'}		5D:291084497-291086497	Triticum aestivum	known
TraesCS5D02G196300	2	{'disease_resistance', 'salt_resistance'}		5D:299832208-299835185	Triticum aestivum	known
TraesCS5D02G223700	2	{'salt_resistance', 'drought_resistance'}		5D:331402389-331406349	Triticum aestivum	known
TraesCS5D02G245300	3	{'disease_resistance', 'salt_resistance', 'drought_resistance'}		5D:353795287-353796446	Triticum aestivum	known
TraesCS5D02G383500	3	{'disease_resistance', 'salt_resistance', 'drought_resistance'}	9-cis epoxycarotenoid dioxygenase [Source:UniProtKB/TrEMBL;Acc:A0A0M4UGS6]	5D:453238775-453240562	Triticum aestivum	known
TraesCS5D02G385300	2	{'disease_resistance', 'drought_resistance'}		5D:454414059-454419771	Triticum aestivum	known
TraesCS5D02G388700	2	{'disease_resistance', 'insect_resistance'}	Lipoxygenase [Source:UniProtKB/TrEMBL;Acc:A0A1D5ZVH4]	5D:458094426-458098176	Triticum aestivum	known
TraesCS5D02G388800	2	{'disease_resistance', 'insect_resistance'}		5D:458179759-458183316	Triticum aestivum	known
TraesCS5D02G401500	2	{'disease_resistance', 'plant_height_reduce'}		5D:467176609-467184508	Triticum aestivum	known
TraesCS5D02G401700	2	{'disease_resistance', 'plant_height_reduce'}	MIKC-type MADS-box transcription factor WM19B [Source:UniProtKB/TrEMBL;Acc:A9J1Z5]	5D:467417868-467424890	Triticum aestivum	known
TraesCS5D02G423800	2	{'disease_resistance', 'insect_resistance'}	Actin-depolymerizing factor 6 [Source:UniProtKB/TrEMBL;Acc:A0A097KUG3]	5D:483645409-483648797	Triticum aestivum	known
TraesCS5D02G475900	2	{'disease_resistance', 'salt_resistance'}		5D:515114772-515119147	Triticum aestivum	known
TraesCS5D02G481200	4	{'disease_resistance', 'grain_weight_increase', 'salt_resistance', 'drought_resistance'}		5D:519277079-519278774	Triticum aestivum	known
TraesCS5D02G491900	2	{'disease_resistance', 'insect_resistance'}		5D:525471415-525472578	Triticum aestivum	known
TraesCS5D02G492300	2	{'disease_resistance', 'insect_resistance'}		5D:525602262-525603227	Triticum aestivum	known
TraesCS6A02G041700	2	{'salt_resistance', 'drought_resistance'}	Catalase [Source:UniProtKB/TrEMBL;Acc:W5GEI6]	6A:22021274-22023743	Triticum aestivum	known
TraesCS6A02G057400	4	{'disease_resistance', 'grain_weight_increase', 'salt_resistance', 'drought_resistance'}		6A:30190380-30191252	Triticum aestivum	known
TraesCS6A02G108300	4	{'disease_resistance', 'grain_weight_increase', 'salt_resistance', 'drought_resistance'}		6A:77097709-77100361	Triticum aestivum	known
TraesCS6A02G146900	3	{'disease_resistance', 'salt_resistance', 'drought_resistance'}	WRKY80 transcription factor [Source:UniProtKB/TrEMBL;Acc:K7WPK5]	6A:126344720-126346757	Triticum aestivum	known
TraesCS6A02G243500	3	{'disease_resistance', 'salt_resistance', 'drought_resistance'}		6A:454934116-454935078	Triticum aestivum	known
TraesCS6A02G247000	2	{'disease_resistance', 'insect_resistance'}		6A:457685808-457687435	Triticum aestivum	known
TraesCS6A02G259000	2	{'disease_resistance', 'plant_height_reduce'}		6A:481736977-481744088	Triticum aestivum	known
TraesCS6A02G298100	2	{'grain_weight_increase', 'plant_height_reduce'}	Glutamine synthetase [Source:UniProtKB/TrEMBL;Acc:Q45NB7]	6A:531394366-531398363	Triticum aestivum	known
TraesCS6A02G319500	2	{'salt_resistance', 'drought_resistance'}		6A:554855518-554856668	Triticum aestivum	known
TraesCS6A02G326500	3	{'disease_resistance', 'salt_resistance', 'drought_resistance'}	WRKY9 [Source:Projected from Arabidopsis thaliana (AT1G68150) UniProtKB/TrEMBL;Acc:A0A178WJS2]	6A:560032024-560034578	Triticum aestivum	known
TraesCS6A02G333600	2	{'salt_resistance', 'drought_resistance'}	bZIP transcription factor, Regulation of ABA signaling and biosynthesis, Drought resistanc [Source: Projected from Oryza sativa (Os02g0766700)]	6A:564715783-564720341	Triticum aestivum	known
TraesCS6A02G384600	2	{'salt_resistance', 'drought_resistance'}		6A:602913152-602916635	Triticum aestivum	known
TraesCS6A02G386600	2	{'disease_resistance', 'salt_resistance'}	S-(hydroxymethyl)glutathione dehydrogenase [Source:UniProtKB/TrEMBL;Acc:A0A341WRG2]	6A:603279456-603282956	Triticum aestivum	known
TraesCS6A02G390300	2	{'disease_resistance', 'salt_resistance'}	Serine/threonine-protein kinase [Source:UniProtKB/TrEMBL;Acc:A0A1D6A8P6]	6A:605324997-605339666	Triticum aestivum	known
TraesCS6B02G056800	2	{'salt_resistance', 'drought_resistance'}		6B:37250792-37253002	Triticum aestivum	known
TraesCS6B02G075200	4	{'disease_resistance', 'grain_weight_increase', 'salt_resistance', 'drought_resistance'}		6B:51579298-51580659	Triticum aestivum	known
TraesCS6B02G146300	3	{'disease_resistance', 'salt_resistance', 'drought_resistance'}	Mitogen-activated protein kinase [Source:UniProtKB/TrEMBL;Acc:A0A341XAY2]	6B:146837429-146841462	Triticum aestivum	known
TraesCS6B02G175100	3	{'disease_resistance', 'salt_resistance', 'drought_resistance'}	WRKY transcription factor, Defense respons [Source: Projected from Oryza sativa (Os02g0181300)]	6B:190122662-190124614	Triticum aestivum	known
TraesCS6B02G255100	2	{'salt_resistance', 'drought_resistance'}		6B:459054712-459061295	Triticum aestivum	known
TraesCS6B02G265000	2	{'salt_resistance', 'plant_height_reduce'}		6B:476428000-476430289	Triticum aestivum	known
TraesCS6B02G269500	2	{'disease_resistance', 'grain_weight_increase'}		6B:485301504-485305443	Triticum aestivum	known
TraesCS6B02G277600	2	{'disease_resistance', 'insect_resistance'}		6B:502483095-502484438	Triticum aestivum	known
TraesCS6B02G281000	3	{'disease_resistance', 'salt_resistance', 'drought_resistance'}		6B:507404337-507405718	Triticum aestivum	known
TraesCS6B02G286400	2	{'disease_resistance', 'plant_height_reduce'}		6B:516074941-516082298	Triticum aestivum	known
TraesCS6B02G298800	3	{'disease_resistance', 'salt_resistance', 'drought_resistance'}	Probable carotenoid cleavage dioxygenase 4, chloroplastic [Source:Projected from Arabidopsis thaliana (AT4G19170) UniProtKB/Swiss-Prot;Acc:O49675]	6B:536814633-536816564	Triticum aestivum	known
TraesCS6B02G327500	2	{'grain_weight_increase', 'plant_height_reduce'}	Glutamine synthetase [Source:UniProtKB/TrEMBL;Acc:Q45NB6]	6B:577183711-577187787	Triticum aestivum	known
TraesCS6B02G350100	2	{'salt_resistance', 'drought_resistance'}		6B:615230245-615231076	Triticum aestivum	known
TraesCS6B02G350400	2	{'salt_resistance', 'drought_resistance'}		6B:615605331-615606561	Triticum aestivum	known
TraesCS6B02G353200	2	{'salt_resistance', 'drought_resistance'}		6B:618942386-618945171	Triticum aestivum	known
TraesCS6B02G364000	2	{'salt_resistance', 'drought_resistance'}	BZIP transcription factor B [Source:UniProtKB/TrEMBL;Acc:A0A1D6AR18]	6B:635168431-635172842	Triticum aestivum	known
TraesCS6B02G366700	3	{'disease_resistance', 'grain_weight_increase', 'plant_height_reduce'}	Growth regulating factor 1-B1 [Source:UniProtKB/TrEMBL;Acc:A0A1D6ANN3]	6B:639532839-639534932	Triticum aestivum	known
TraesCS6B02G375400	2	{'salt_resistance', 'drought_resistance'}		6B:649831108-649834547	Triticum aestivum	known
TraesCS6B02G425700	2	{'disease_resistance', 'salt_resistance'}	S-(hydroxymethyl)glutathione dehydrogenase [Source:UniProtKB/TrEMBL;Acc:A0A1D6APK3]	6B:694401891-694405637	Triticum aestivum	known
TraesCS6B02G454800	2	{'salt_resistance', 'plant_height_reduce'}		6B:712227427-712229904	Triticum aestivum	known
TraesCS6D02G048300	2	{'salt_resistance', 'drought_resistance'}	Catalase [Source:UniProtKB/TrEMBL;Acc:F1DKC1]	6D:23075148-23077733	Triticum aestivum	known
TraesCS6D02G059300	4	{'disease_resistance', 'grain_weight_increase', 'salt_resistance', 'drought_resistance'}		6D:27819143-27820652	Triticum aestivum	known
TraesCS6D02G096300	4	{'disease_resistance', 'grain_weight_increase', 'salt_resistance', 'drought_resistance'}		6D:60486167-60488033	Triticum aestivum	known
TraesCS6D02G131900	2	{'salt_resistance', 'drought_resistance'}		6D:98034029-98041253	Triticum aestivum	known
TraesCS6D02G136200	3	{'disease_resistance', 'salt_resistance', 'drought_resistance'}	WRKY transcription factor 33-3 [Source:UniProtKB/TrEMBL;Acc:A0A1D6BE51]	6D:104453626-104455779	Triticum aestivum	known
TraesCS6D02G229200	2	{'disease_resistance', 'insect_resistance'}	Actin-depolymerizing factor 11 [Source:UniProtKB/TrEMBL;Acc:A0A097KUI0]	6D:320228058-320229328	Triticum aestivum	known
TraesCS6D02G240200	2	{'disease_resistance', 'plant_height_reduce'}		6D:341645273-341652764	Triticum aestivum	known
TraesCS6D02G298700	2	{'salt_resistance', 'drought_resistance'}		6D:409516233-409517479	Triticum aestivum	known
TraesCS6D02G299000	2	{'salt_resistance', 'drought_resistance'}		6D:409584102-409585067	Triticum aestivum	known
TraesCS6D02G299100	2	{'salt_resistance', 'drought_resistance'}		6D:409655015-409656300	Triticum aestivum	known
TraesCS6D02G302300	2	{'salt_resistance', 'drought_resistance'}				known
TraesCS6D02G312800	2	{'salt_resistance', 'drought_resistance'}	bZIP transcription factor, Regulation of ABA signaling and biosynthesis, Drought resistanc [Source: Projected from Oryza sativa (Os02g0766700)]	6D:421879860-421884322	Triticum aestivum	known
TraesCS6D02G314300	2	{'salt_resistance', 'insect_resistance'}	Allene oxide cyclase, Biosynthesis of jasmonic acid, Defence respons [Source: Projected from Oryza sativa (Os03g0438100)]	6D:422610993-422612185	Triticum aestivum	known
TraesCS6D02G371200	2	{'disease_resistance', 'salt_resistance'}	S-(hydroxymethyl)glutathione dehydrogenase [Source:UniProtKB/TrEMBL;Acc:W5H151]	6D:456554723-456558968	Triticum aestivum	known
TraesCS7A02G111300	3	{'disease_resistance', 'salt_resistance', 'drought_resistance'}	Mitogen-activated protein kinase [Source:UniProtKB/TrEMBL;Acc:A0A1D6BXQ8]	7A:68086983-68094361	Triticum aestivum	known
TraesCS7A02G122000	2	{'disease_resistance', 'plant_height_reduce'}		7A:78512067-78520729	Triticum aestivum	known
TraesCS7A02G170600	2	{'salt_resistance', 'drought_resistance'}	bZIP transcription factor, Positive regulator of ABA signaling, Drought toleranc [Source: Projected from Oryza sativa (Os06g0211200)]	7A:126576805-126581468	Triticum aestivum	known
TraesCS7A02G260600	2	{'disease_resistance', 'plant_height_reduce'}		7A:253427732-253433089	Triticum aestivum	known
TraesCS7A02G267000	2	{'disease_resistance', 'salt_resistance'}		7A:270041942-270044241	Triticum aestivum	known
TraesCS7A02G350800	2	{'salt_resistance', 'drought_resistance'}		7A:514017729-514024709	Triticum aestivum	known
TraesCS7A02G357000	2	{'disease_resistance', 'drought_resistance'}	Protein DETOXIFICATION [Source:UniProtKB/TrEMBL;Acc:A0A1D6BM27]	7A:523146060-523148106	Triticum aestivum	known
TraesCS7A02G377600	3	{'disease_resistance', 'salt_resistance', 'drought_resistance'}	Non-specific serine/threonine protein kinase [Source:UniProtKB/TrEMBL;Acc:A0A341YAB0]	7A:553036442-553043512	Triticum aestivum	known
TraesCS7A02G412400	2	{'salt_resistance', 'drought_resistance'}	12-oxophytodienoate reductase (EC:1.3.1.42), Jasmonic acid (JA) biosynthesi [Source: Projected from Oryza sativa (Os08g0459600)]	7A:603291570-603295119	Triticum aestivum	known
TraesCS7A02G422500	3	{'disease_resistance', 'salt_resistance', 'drought_resistance'}	Mitogen-activated protein kinase [Source:UniProtKB/TrEMBL;Acc:A0A1D6BQ67]	7A:612990989-612994043	Triticum aestivum	known
TraesCS7A02G484800	2	{'disease_resistance', 'salt_resistance'}	Serine/threonine-protein kinase [Source:UniProtKB/TrEMBL;Acc:W5H6H9]	7A:675587045-675590716	Triticum aestivum	known
TraesCS7A02G549800	2	{'salt_resistance', 'drought_resistance'}	Catalase [Source:UniProtKB/TrEMBL;Acc:A0A0H4LXI0]	7A:724082577-724090076	Triticum aestivum	known
TraesCS7A02G549900	2	{'salt_resistance', 'drought_resistance'}		7A:724113049-724114569	Triticum aestivum	known
TraesCS7A02G557300	2	{'disease_resistance', 'salt_resistance'}	Phytoene synthase 1 [Source:UniProtKB/TrEMBL;Acc:A7KWY8]	7A:729397165-729401834	Triticum aestivum	known
TraesCS7A02G569100	4	{'disease_resistance', 'salt_resistance', 'plant_height_reduce', 'drought_resistance'}		7A:736465686-736467786	Triticum aestivum	known
TraesCS7A02G569300	2	{'salt_resistance', 'plant_height_reduce'}		7A:736496874-736498842	Triticum aestivum	known
TraesCS7B02G020800	2	{'disease_resistance', 'plant_height_reduce'}		7B:18207990-18218252	Triticum aestivum	known
TraesCS7B02G056300	4	{'disease_resistance', 'salt_resistance', 'plant_height_reduce', 'drought_resistance'}		7B:59179003-59180628	Triticum aestivum	known
TraesCS7B02G075600	2	{'salt_resistance', 'drought_resistance'}	bZIP transcription factor, Positive regulator of ABA signaling, Drought toleranc [Source: Projected from Oryza sativa (Os06g0211200)]	7B:85127850-85133586	Triticum aestivum	known
TraesCS7B02G149200	2	{'disease_resistance', 'salt_resistance'}	Heat shock protein 90 [Source:UniProtKB/TrEMBL;Acc:F4Y593]	7B:196904657-196908997	Triticum aestivum	known
TraesCS7B02G158600	2	{'disease_resistance', 'plant_height_reduce'}	MADS-box protein [Source:UniProtKB/TrEMBL;Acc:A7BJ56]	7B:215000979-215006781	Triticum aestivum	known
TraesCS7B02G246900	3	{'disease_resistance', 'salt_resistance', 'drought_resistance'}	Mitogen-activated protein kinase [Source:UniProtKB/TrEMBL;Acc:A0A1D6C3I9]	7B:457243859-457252780	Triticum aestivum	known
TraesCS7B02G279300	3	{'disease_resistance', 'salt_resistance', 'drought_resistance'}	Non-specific serine/threonine protein kinase [Source:UniProtKB/TrEMBL;Acc:A0A341YIA3]	7B:511928111-511934290	Triticum aestivum	known
TraesCS7B02G311600	2	{'salt_resistance', 'drought_resistance'}	12-oxo-phytodienoic acid reductase 2 [Source:UniProtKB/TrEMBL;Acc:A0A0A0S1W1]	7B:557057267-557060890	Triticum aestivum	known
TraesCS7B02G319100	2	{'disease_resistance', 'plant_height_reduce'}	Beta-carotene isomerase D27, chloroplastic [Source:Projected from Arabidopsis thaliana (AT1G03055) UniProtKB/Swiss-Prot;Acc:Q7XA78]	7B:568679226-568684405	Triticum aestivum	known
TraesCS7B02G322900	3	{'disease_resistance', 'salt_resistance', 'drought_resistance'}	Mitogen-activated protein kinase [Source:UniProtKB/TrEMBL;Acc:W5HP62]	7B:573261339-573264067	Triticum aestivum	known
TraesCS7B02G473400	2	{'salt_resistance', 'drought_resistance'}	Catalase [Source:UniProtKB/TrEMBL;Acc:A0A1D6C2U1]	7B:730149989-730153654	Triticum aestivum	known
TraesCS7B02G482000	2	{'disease_resistance', 'salt_resistance'}	Phytoene synthase 7B [Source:UniProtKB/TrEMBL;Acc:C1IP78]	7B:739442097-739446001	Triticum aestivum	known
TraesCS7B02G489500	4	{'disease_resistance', 'salt_resistance', 'plant_height_reduce', 'drought_resistance'}		7B:743456007-743458084	Triticum aestivum	known
TraesCS7D02G030000	3	{'disease_resistance', 'salt_resistance', 'drought_resistance'}	6-phosphogluconate dehydrogenase, decarboxylating [Source:UniProtKB/TrEMBL;Acc:A0A1D6D541]	7D:15780811-15783788	Triticum aestivum	known
TraesCS7D02G080500	2	{'salt_resistance', 'plant_height_reduce'}	Lectin receptor kinase 1 [Source:UniProtKB/TrEMBL;Acc:B8XSM8]	7D:47453911-47456216	Triticum aestivum	known
TraesCS7D02G080600	3	{'disease_resistance', 'salt_resistance', 'plant_height_reduce'}	Lectin receptor kinase 2 [Source:UniProtKB/TrEMBL;Acc:B8XSM9]	7D:47457550-47459790	Triticum aestivum	known
TraesCS7D02G087000	2	{'disease_resistance', 'drought_resistance'}		7D:53431568-53434270	Triticum aestivum	known
TraesCS7D02G092900	3	{'disease_resistance', 'salt_resistance', 'drought_resistance'}		7D:55411597-55415076	Triticum aestivum	known
TraesCS7D02G120500	2	{'disease_resistance', 'plant_height_reduce'}	MIKC-type MADS-box transcription factor WM20 [Source:UniProtKB/TrEMBL;Acc:A9J1Z7]	7D:74600828-74607891	Triticum aestivum	known
TraesCS7D02G120600	2	{'disease_resistance', 'plant_height_reduce'}		7D:74947257-74965016	Triticum aestivum	known
TraesCS7D02G154200	3	{'disease_resistance', 'salt_resistance', 'drought_resistance'}		7D:101797550-101799122	Triticum aestivum	known
TraesCS7D02G171300	2	{'salt_resistance', 'drought_resistance'}	bZIP transcription factor, Positive regulator of ABA signaling, Drought toleranc [Source: Projected from Oryza sativa (Os06g0211200)]	7D:123653486-123658548	Triticum aestivum	known
TraesCS7D02G196300	2	{'salt_resistance', 'plant_height_reduce'}		7D:152947488-152949088	Triticum aestivum	known
TraesCS7D02G241100	2	{'disease_resistance', 'salt_resistance'}	Heat shock protein 90 [Source:UniProtKB/TrEMBL;Acc:F4Y594]	7D:205542075-205546404	Triticum aestivum	known
TraesCS7D02G261600	2	{'disease_resistance', 'plant_height_reduce'}		7D:237609830-237619034	Triticum aestivum	known
TraesCS7D02G291200	2	{'disease_resistance', 'grain_weight_increase'}	A member of the somatic embryogenesis receptor kinases (SERKs) family, Brassinosteroid (BR) signaling, Regulation of plant architectur [Source: Projected from Oryza sativa (Os08g0174700)]	7D:348189558-348196326	Triticum aestivum	known
TraesCS7D02G295900	3	{'disease_resistance', 'salt_resistance', 'drought_resistance'}		7D:371729092-371732223	Triticum aestivum	known
TraesCS7D02G342800	3	{'disease_resistance', 'salt_resistance', 'drought_resistance'}	Mitogen-activated protein kinase [Source:UniProtKB/TrEMBL;Acc:A0A1D6CU27]	7D:439463570-439478002	Triticum aestivum	known
TraesCS7D02G374400	3	{'disease_resistance', 'salt_resistance', 'drought_resistance'}	Non-specific serine/threonine protein kinase [Source:UniProtKB/TrEMBL;Acc:W5I165]	7D:484724524-484730731	Triticum aestivum	known
TraesCS7D02G405500	2	{'salt_resistance', 'drought_resistance'}	12-oxophytodienoate reductase (EC:1.3.1.42), Jasmonic acid (JA) biosynthesi [Source: Projected from Oryza sativa (Os08g0459600)]	7D:523045331-523049172	Triticum aestivum	known
TraesCS7D02G553300	2	{'disease_resistance', 'salt_resistance'}	Phytoene synthase 1 [Source:UniProtKB/TrEMBL;Acc:C3RXR8]	7D:636765931-636771068	Triticum aestivum	known
TraesCSU02G001400	2	{'salt_resistance', 'drought_resistance'}		Un:1823078-1825218	Triticum aestivum	known
TraesCSU02G001500	2	{'salt_resistance', 'drought_resistance'}		Un:1926406-1928946	Triticum aestivum	known
TraesCSU02G001600	2	{'salt_resistance', 'drought_resistance'}		Un:1944014-1946368	Triticum aestivum	known
TraesCSU02G105300	2	{'salt_resistance', 'drought_resistance'}	Catalase [Source:UniProtKB/TrEMBL;Acc:A0A1D6SEV8]	Un:92716574-92720683	Triticum aestivum	known
TraesCSU02G135000	2	{'salt_resistance', 'drought_resistance'}		Un:116282575-116289812	Triticum aestivum	known
TraesCSU02G163600	3	{'disease_resistance', 'salt_resistance', 'drought_resistance'}		Un:236253292-236254197	Triticum aestivum	known
TraesCSU02G204200	2	{'salt_resistance', 'drought_resistance'}		Un:303756794-303757588	Triticum aestivum	known
Zm00001d000055	2	{'disease_resistance', 'grain_weight_increase'}		1:115179728-115183084	Zea mays	known
Zm00001d000112	3	{'disease_resistance', 'salt_resistance', 'drought_resistance'}		4:214323823-214325666	Zea mays	known
Zm00001d000238	3	{'disease_resistance', 'grain_weight_increase', 'plant_height_reduce'}		9:11189407-11190807	Zea mays	known
Zm00001d001900	3	{'disease_resistance', 'salt_resistance', 'drought_resistance'}		2:2841537-2844784	Zea mays	known
Zm00001d002000	2	{'disease_resistance', 'insect_resistance'}		2:4413124-4416545	Zea mays	known
Zm00001d002029	2	{'salt_resistance', 'drought_resistance'}		2:4929297-4932554	Zea mays	known
Zm00001d002174	3	{'disease_resistance', 'salt_resistance', 'drought_resistance'}		2:7503043-7512041	Zea mays	known
Zm00001d002175	2	{'disease_resistance', 'salt_resistance'}		2:7527932-7530625	Zea mays	known
Zm00001d002181	2	{'disease_resistance', 'salt_resistance'}		2:7662662-7664652	Zea mays	known
Zm00001d002199	2	{'disease_resistance', 'salt_resistance'}		2:8389867-8393922	Zea mays	known
Zm00001d002429	3	{'disease_resistance', 'grain_weight_increase', 'plant_height_reduce'}		2:12701017-12704269	Zea mays	known
Zm00001d002623	2	{'disease_resistance', 'drought_resistance'}		2:17264950-17266656	Zea mays	known
Zm00001d002762	3	{'disease_resistance', 'salt_resistance', 'drought_resistance'}		2:22116917-22117756	Zea mays	known
Zm00001d003019	2	{'disease_resistance', 'drought_resistance'}		2:29708413-29714900	Zea mays	known
Zm00001d003101	3	{'disease_resistance', 'plant_height_reduce', 'insect_resistance'}		2:32154124-32157984	Zea mays	known
Zm00001d003349	2	{'disease_resistance', 'grain_weight_increase'}		2:41039839-41043182	Zea mays	known
Zm00001d003451	2	{'disease_resistance', 'salt_resistance'}		2:44763628-44765226	Zea mays	known
Zm00001d003512	3	{'disease_resistance', 'salt_resistance', 'drought_resistance'}		2:46242066-46246246	Zea mays	known
Zm00001d003554	2	{'disease_resistance', 'salt_resistance'}		2:47778396-47779022	Zea mays	known
Zm00001d003584	2	{'salt_resistance', 'drought_resistance'}				known
Zm00001d003813	2	{'salt_resistance', 'drought_resistance'}		2:60478004-60488682	Zea mays	known
Zm00001d003884	3	{'disease_resistance', 'salt_resistance', 'drought_resistance'}		2:65503459-65504864	Zea mays	known
Zm00001d004361	2	{'salt_resistance', 'drought_resistance'}		2:106458843-106467638	Zea mays	known
Zm00001d005250	3	{'disease_resistance', 'salt_resistance', 'drought_resistance'}		2:165512867-165518023	Zea mays	known
Zm00001d005391	3	{'disease_resistance', 'salt_resistance', 'drought_resistance'}		2:171738658-171739989	Zea mays	known
Zm00001d005451	3	{'disease_resistance', 'salt_resistance', 'drought_resistance'}		2:174275030-174279906	Zea mays	known
Zm00001d005478	3	{'disease_resistance', 'salt_resistance', 'drought_resistance'}		2:175186824-175191849	Zea mays	known
Zm00001d005609	3	{'disease_resistance', 'salt_resistance', 'drought_resistance'}		2:180274743-180275795	Zea mays	known
Zm00001d005749	3	{'disease_resistance', 'salt_resistance', 'drought_resistance'}		2:185569294-185570847	Zea mays	known
Zm00001d005775	3	{'disease_resistance', 'salt_resistance', 'drought_resistance'}		2:187368821-187373072	Zea mays	known
Zm00001d005798	2	{'salt_resistance', 'drought_resistance'}		2:188557053-188558523	Zea mays	known
Zm00001d005813	2	{'salt_resistance', 'drought_resistance'}		2:189039642-189040895	Zea mays	known
Zm00001d005889	2	{'salt_resistance', 'drought_resistance'}		2:191325753-191328462	Zea mays	known
Zm00001d005892	3	{'disease_resistance', 'salt_resistance', 'drought_resistance'}		2:191431271-191432062	Zea mays	known
Zm00001d006008	2	{'disease_resistance', 'salt_resistance'}		2:194676036-194679385	Zea mays	known
Zm00001d006236	4	{'disease_resistance', 'salt_resistance', 'insect_resistance', 'drought_resistance'}		2:202731125-202739424	Zea mays	known
Zm00001d006348	3	{'disease_resistance', 'grain_weight_increase', 'plant_height_reduce'}		2:205347948-205349682	Zea mays	known
Zm00001d006621	2	{'disease_resistance', 'salt_resistance'}		2:212768976-212771953	Zea mays	known
Zm00001d006944	3	{'disease_resistance', 'salt_resistance', 'drought_resistance'}		2:219945595-219949740	Zea mays	known
Zm00001d007049	3	{'disease_resistance', 'salt_resistance', 'drought_resistance'}		2:220848453-220849692	Zea mays	known
Zm00001d007188	2	{'disease_resistance', 'salt_resistance'}		2:224100465-224102252	Zea mays	known
Zm00001d007271	2	{'disease_resistance', 'salt_resistance'}		2:226318808-226319371	Zea mays	known
Zm00001d007876	3	{'disease_resistance', 'salt_resistance', 'drought_resistance'}		2:240795634-240797361	Zea mays	known
Zm00001d008190	3	{'disease_resistance', 'salt_resistance', 'drought_resistance'}		8:947922-957366	Zea mays	known
Zm00001d008251	2	{'salt_resistance', 'drought_resistance'}		8:3093000-3094163	Zea mays	known
Zm00001d008665	2	{'salt_resistance', 'drought_resistance'}		8:16438393-16439714	Zea mays	known
Zm00001d008691	2	{'salt_resistance', 'drought_resistance'}		8:17286078-17288978	Zea mays	known
Zm00001d008794	3	{'disease_resistance', 'salt_resistance', 'drought_resistance'}		8:20464722-20466611	Zea mays	known
Zm00001d008869	2	{'disease_resistance', 'drought_resistance'}		8:23253078-23257495	Zea mays	known
Zm00001d008882	2	{'disease_resistance', 'plant_height_reduce'}		8:23596593-23605218	Zea mays	known
Zm00001d008957	2	{'disease_resistance', 'insect_resistance'}		8:27043021-27047521	Zea mays	known
Zm00001d009595	3	{'disease_resistance', 'salt_resistance', 'drought_resistance'}		8:72349803-72353461	Zea mays	known
Zm00001d009795	3	{'disease_resistance', 'salt_resistance', 'drought_resistance'}		8:81886811-81892235	Zea mays	known
Zm00001d010048	2	{'salt_resistance', 'drought_resistance'}		8:96775353-96778297	Zea mays	known
Zm00001d010175	2	{'salt_resistance', 'drought_resistance'}		8:102969924-102972252	Zea mays	known
Zm00001d010445	2	{'salt_resistance', 'drought_resistance'}		8:115267344-115268935	Zea mays	known
Zm00001d010459	3	{'disease_resistance', 'salt_resistance', 'drought_resistance'}		8:116082724-116084076	Zea mays	known
Zm00001d010950	3	{'disease_resistance', 'salt_resistance', 'insect_resistance'}		8:134519507-134530702	Zea mays	known
Zm00001d010974	2	{'salt_resistance', 'drought_resistance'}		8:135174978-135186304	Zea mays	known
Zm00001d011097	2	{'salt_resistance', 'drought_resistance'}		8:138445322-138446473	Zea mays	known
Zm00001d011237	3	{'disease_resistance', 'salt_resistance', 'drought_resistance'}		8:143708860-143709831	Zea mays	known
Zm00001d011315	4	{'disease_resistance', 'salt_resistance', 'insect_resistance', 'drought_resistance'}		8:146038732-146045609	Zea mays	known
Zm00001d011319	4	{'disease_resistance', 'salt_resistance', 'insect_resistance', 'drought_resistance'}		8:146072760-146079479	Zea mays	known
Zm00001d011473	2	{'salt_resistance', 'insect_resistance'}		8:150947013-150952124	Zea mays	known
Zm00001d011495	3	{'disease_resistance', 'salt_resistance', 'drought_resistance'}		8:151777974-151781857	Zea mays	known
Zm00001d011721	2	{'disease_resistance', 'grain_weight_increase'}		8:159137553-159140921	Zea mays	known
Zm00001d011920	2	{'salt_resistance', 'drought_resistance'}		8:165948563-165952870	Zea mays	known
Zm00001d012005	2	{'salt_resistance', 'drought_resistance'}		8:167687716-167691937	Zea mays	known
Zm00001d012263	3	{'disease_resistance', 'salt_resistance', 'drought_resistance'}		8:172703282-172709032	Zea mays	known
Zm00001d012296	2	{'salt_resistance', 'drought_resistance'}		8:173334890-173336494	Zea mays	known
Zm00001d012475	2	{'salt_resistance', 'drought_resistance'}		8:176433412-176439332	Zea mays	known
Zm00001d012585	2	{'salt_resistance', 'drought_resistance'}		8:178147966-178148691	Zea mays	known
Zm00001d012660	2	{'disease_resistance', 'insect_resistance'}		8:179365119-179368262	Zea mays	known
Zm00001d012717	2	{'salt_resistance', 'insect_resistance'}		8:180360671-180366629	Zea mays	known
Zm00001d012744	3	{'disease_resistance', 'salt_resistance', 'drought_resistance'}		8:180819798-180822968	Zea mays	known
Zm00001d012883	2	{'disease_resistance', 'drought_resistance'}		5:1857208-1859597	Zea mays	known
Zm00001d012966	2	{'disease_resistance', 'insect_resistance'}		5:2677814-2679311	Zea mays	known
Zm00001d013109	2	{'disease_resistance', 'salt_resistance'}		5:4962605-4965180	Zea mays	known
Zm00001d013141	2	{'disease_resistance', 'insect_resistance'}		5:5554384-5557143	Zea mays	known
Zm00001d013261	3	{'disease_resistance', 'salt_resistance', 'drought_resistance'}		5:7548712-7549974	Zea mays	known
Zm00001d013418	2	{'disease_resistance', 'salt_resistance'}		5:10994053-10995033	Zea mays	known
Zm00001d013465	3	{'grain_weight_increase', 'salt_resistance', 'plant_height_reduce'}		5:12392674-12394551	Zea mays	known
Zm00001d013493	2	{'disease_resistance', 'insect_resistance'}		5:12865760-12870240	Zea mays	known
Zm00001d013527	2	{'disease_resistance', 'salt_resistance'}		5:13793886-13796668	Zea mays	known
Zm00001d013689	3	{'disease_resistance', 'salt_resistance', 'drought_resistance'}		5:17614235-17616040	Zea mays	known
Zm00001d013699	2	{'disease_resistance', 'drought_resistance'}		5:18005567-18010950	Zea mays	known
Zm00001d013736	3	{'disease_resistance', 'salt_resistance', 'drought_resistance'}		5:19375173-19377286	Zea mays	known
Zm00001d014297	2	{'salt_resistance', 'drought_resistance'}		5:40285938-40312919	Zea mays	known
Zm00001d014421	2	{'grain_weight_increase', 'plant_height_reduce'}		5:46131572-46133724	Zea mays	known
Zm00001d014726	3	{'disease_resistance', 'salt_resistance', 'drought_resistance'}		5:60875105-60879963	Zea mays	known
Zm00001d014848	2	{'salt_resistance', 'drought_resistance'}		5:65471067-65474842	Zea mays	known
Zm00001d015100	2	{'disease_resistance', 'salt_resistance'}		5:75243808-75250380	Zea mays	known
Zm00001d015269	3	{'disease_resistance', 'salt_resistance', 'drought_resistance'}		5:81917478-81920590	Zea mays	known
Zm00001d015381	2	{'disease_resistance', 'plant_height_reduce'}		5:87155821-87158213	Zea mays	known
Zm00001d015477	2	{'salt_resistance', 'drought_resistance'}		5:92430939-92436812	Zea mays	known
Zm00001d015515	3	{'disease_resistance', 'salt_resistance', 'drought_resistance'}		5:94907353-94908530	Zea mays	known
Zm00001d016105	2	{'salt_resistance', 'drought_resistance'}		5:144205003-144208441	Zea mays	known
Zm00001d016294	2	{'salt_resistance', 'drought_resistance'}		5:155389449-155390015	Zea mays	known
Zm00001d016924	2	{'disease_resistance', 'salt_resistance'}		5:179420562-179421851	Zea mays	known
Zm00001d017199	2	{'salt_resistance', 'drought_resistance'}		5:187756319-187756998	Zea mays	known
Zm00001d017462	3	{'disease_resistance', 'salt_resistance', 'drought_resistance'}		5:195551259-195552107	Zea mays	known
Zm00001d017466	3	{'disease_resistance', 'salt_resistance', 'drought_resistance'}		5:195705255-195706244	Zea mays	known
Zm00001d017516	2	{'disease_resistance', 'insect_resistance'}		5:197452344-197454682	Zea mays	known
Zm00001d017742	3	{'disease_resistance', 'grain_weight_increase', 'plant_height_reduce'}		5:208352716-208355849	Zea mays	known
Zm00001d017766	3	{'disease_resistance', 'salt_resistance', 'drought_resistance'}		5:208806826-208808745	Zea mays	known
Zm00001d017932	2	{'disease_resistance', 'plant_height_reduce'}		5:212875813-212887280	Zea mays	known
Zm00001d017958	2	{'grain_weight_increase', 'plant_height_reduce'}		5:213469865-213472964	Zea mays	known
Zm00001d018142	2	{'disease_resistance', 'plant_height_reduce'}		5:217888027-217894472	Zea mays	known
Zm00001d018178	2	{'salt_resistance', 'drought_resistance'}		5:218412609-218421795	Zea mays	known
Zm00001d018203	3	{'disease_resistance', 'salt_resistance', 'drought_resistance'}		5:219067491-219069955	Zea mays	known
Zm00001d018326	3	{'disease_resistance', 'salt_resistance', 'drought_resistance'}		5:221028951-221030021	Zea mays	known
Zm00001d018635	2	{'disease_resistance', 'grain_weight_increase'}		7:1397714-1400788	Zea mays	known
Zm00001d018667	2	{'disease_resistance', 'plant_height_reduce'}		7:2156983-2167573	Zea mays	known
Zm00001d018799	3	{'disease_resistance', 'salt_resistance', 'drought_resistance'}		7:5312108-5315906	Zea mays	known
Zm00001d018819	3	{'disease_resistance', 'salt_resistance', 'drought_resistance'}		7:6245731-6247452	Zea mays	known
Zm00001d019149	3	{'disease_resistance', 'salt_resistance', 'drought_resistance'}		7:19135175-19140391	Zea mays	known
Zm00001d019317	3	{'disease_resistance', 'salt_resistance', 'drought_resistance'}		7:27379348-27384310	Zea mays	known
Zm00001d019712	2	{'salt_resistance', 'drought_resistance'}		7:52720677-52721714	Zea mays	known
Zm00001d019744	3	{'disease_resistance', 'salt_resistance', 'drought_resistance'}		7:54858576-54858986	Zea mays	known
Zm00001d019951	4	{'disease_resistance', 'salt_resistance', 'insect_resistance', 'drought_resistance'}		7:81099783-81112198	Zea mays	known
Zm00001d019961	4	{'disease_resistance', 'salt_resistance', 'insect_resistance', 'drought_resistance'}		7:82100537-82117053	Zea mays	known
Zm00001d019983	2	{'disease_resistance', 'grain_weight_increase'}		7:83362358-83366005	Zea mays	known
Zm00001d020100	3	{'disease_resistance', 'salt_resistance', 'drought_resistance'}		7:93421493-93422569	Zea mays	known
Zm00001d020408	3	{'salt_resistance', 'insect_resistance', 'drought_resistance'}		7:113345940-113346980	Zea mays	known
Zm00001d020492	3	{'disease_resistance', 'salt_resistance', 'drought_resistance'}		7:120043458-120044599	Zea mays	known
Zm00001d020531	3	{'disease_resistance', 'salt_resistance', 'drought_resistance'}		7:122676604-122680775	Zea mays	known
Zm00001d020711	2	{'salt_resistance', 'drought_resistance'}		7:131078392-131093623	Zea mays	known
Zm00001d020717	2	{'salt_resistance', 'drought_resistance'}		7:131298502-131301002	Zea mays	known
Zm00001d020827	2	{'disease_resistance', 'salt_resistance'}		7:135311707-135316087	Zea mays	known
Zm00001d020898	2	{'disease_resistance', 'salt_resistance'}		7:137153466-137157598	Zea mays	known
Zm00001d020939	2	{'disease_resistance', 'salt_resistance'}		7:138530529-138532358	Zea mays	known
Zm00001d020955	2	{'disease_resistance', 'drought_resistance'}		7:138937138-138939739	Zea mays	known
Zm00001d021057	2	{'disease_resistance', 'plant_height_reduce'}		7:142963988-142974757	Zea mays	known
Zm00001d021362	3	{'disease_resistance', 'grain_weight_increase', 'plant_height_reduce'}		7:151121897-151123855	Zea mays	known
Zm00001d021729	3	{'disease_resistance', 'salt_resistance', 'drought_resistance'}		7:165152293-165157784	Zea mays	known
Zm00001d021835	2	{'disease_resistance', 'salt_resistance'}		7:167817310-167820307	Zea mays	known
Zm00001d022088	2	{'disease_resistance', 'plant_height_reduce'}		7:173406846-173411884	Zea mays	known
Zm00001d022179	3	{'disease_resistance', 'salt_resistance', 'drought_resistance'}		7:175482143-175487264	Zea mays	known
Zm00001d022437	3	{'disease_resistance', 'salt_resistance', 'drought_resistance'}		7:182243004-182245111	Zea mays	known
Zm00001d022530	2	{'disease_resistance', 'salt_resistance'}		7:182932497-182933861	Zea mays	known
Zm00001d023282	3	{'salt_resistance', 'insect_resistance', 'drought_resistance'}		10:2009223-2010186	Zea mays	known
Zm00001d023353	3	{'disease_resistance', 'salt_resistance', 'drought_resistance'}		10:3930343-3931632	Zea mays	known
Zm00001d023810	3	{'disease_resistance', 'salt_resistance', 'drought_resistance'}		10:22555342-22559197	Zea mays	known
Zm00001d023955	2	{'disease_resistance', 'plant_height_reduce'}		10:31345241-31347962	Zea mays	known
Zm00001d023994	2	{'disease_resistance', 'salt_resistance'}		10:34811444-34816153	Zea mays	known
Zm00001d024037	2	{'disease_resistance', 'salt_resistance'}		10:38458705-38463244	Zea mays	known
Zm00001d024903	2	{'disease_resistance', 'salt_resistance'}		10:95653402-95655673	Zea mays	known
Zm00001d025043	2	{'salt_resistance', 'drought_resistance'}		10:102894437-102901473	Zea mays	known
Zm00001d025055	3	{'disease_resistance', 'salt_resistance', 'drought_resistance'}		10:103573333-103577996	Zea mays	known
Zm00001d025409	2	{'salt_resistance', 'drought_resistance'}		10:119255954-119256715	Zea mays	known
Zm00001d025508	2	{'disease_resistance', 'salt_resistance'}		10:122371891-122372544	Zea mays	known
Zm00001d025920	3	{'disease_resistance', 'salt_resistance', 'plant_height_reduce'}		10:135117039-135119048	Zea mays	known
Zm00001d025921	3	{'disease_resistance', 'salt_resistance', 'plant_height_reduce'}		10:135121719-135129313	Zea mays	known
Zm00001d026041	2	{'salt_resistance', 'drought_resistance'}		10:137984671-138007769	Zea mays	known
Zm00001d026083	2	{'disease_resistance', 'grain_weight_increase'}		10:139482839-139486331	Zea mays	known
Zm00001d026191	3	{'disease_resistance', 'salt_resistance', 'drought_resistance'}		10:142076075-142076887	Zea mays	known
Zm00001d026382	2	{'disease_resistance', 'salt_resistance'}		10:146274538-146277671	Zea mays	known
Zm00001d026477	2	{'salt_resistance', 'drought_resistance'}		10:148161726-148165109	Zea mays	known
Zm00001d026511	3	{'disease_resistance', 'salt_resistance', 'drought_resistance'}		10:148826656-148843115	Zea mays	known
Zm00001d026577	3	{'disease_resistance', 'salt_resistance', 'drought_resistance'}		10:149716455-149720076	Zea mays	known
Zm00001d026690	3	{'disease_resistance', 'salt_resistance', 'drought_resistance'}		10:151503795-151504954	Zea mays	known
Zm00001d027317	2	{'disease_resistance', 'drought_resistance'}		1:2811274-2817363	Zea mays	known
Zm00001d027511	2	{'salt_resistance', 'drought_resistance'}		1:7097829-7099700	Zea mays	known
Zm00001d027686	3	{'disease_resistance', 'salt_resistance', 'drought_resistance'}		1:11076069-11076461	Zea mays	known
Zm00001d027925	3	{'disease_resistance', 'salt_resistance', 'drought_resistance'}		1:17702519-17703710	Zea mays	known
Zm00001d028017	2	{'salt_resistance', 'drought_resistance'}		1:20259656-20260558	Zea mays	known
Zm00001d028199	2	{'disease_resistance', 'salt_resistance'}		1:25766185-25773067	Zea mays	known
Zm00001d028217	2	{'disease_resistance', 'plant_height_reduce'}		1:26638404-26647730	Zea mays	known
Zm00001d028260	2	{'grain_weight_increase', 'plant_height_reduce'}		1:27921989-27924508	Zea mays	known
Zm00001d028325	2	{'disease_resistance', 'grain_weight_increase'}		1:30516414-30522053	Zea mays	known
Zm00001d028555	2	{'disease_resistance', 'salt_resistance'}		1:38574936-38575412	Zea mays	known
Zm00001d028557	2	{'disease_resistance', 'salt_resistance'}		1:38662848-38663324	Zea mays	known
Zm00001d028560	2	{'disease_resistance', 'grain_weight_increase'}		1:38733263-38740618	Zea mays	known
Zm00001d028561	2	{'disease_resistance', 'salt_resistance'}		1:38791541-38792020	Zea mays	known
Zm00001d028574	3	{'disease_resistance', 'salt_resistance', 'drought_resistance'}		1:39067759-39069199	Zea mays	known
Zm00001d028733	3	{'disease_resistance', 'salt_resistance', 'drought_resistance'}		1:44180181-44184046	Zea mays	known
Zm00001d029047	2	{'disease_resistance', 'salt_resistance'}		1:55485931-55488591	Zea mays	known
Zm00001d029594	2	{'salt_resistance', 'insect_resistance'}		1:77452370-77453191	Zea mays	known
Zm00001d029684	2	{'salt_resistance', 'drought_resistance'}		1:81759070-81764705	Zea mays	known
Zm00001d029940	3	{'disease_resistance', 'salt_resistance', 'drought_resistance'}		1:94909188-94909913	Zea mays	known
Zm00001d029975	3	{'disease_resistance', 'salt_resistance', 'drought_resistance'}		1:96237647-96240686	Zea mays	known
Zm00001d029976	3	{'disease_resistance', 'salt_resistance', 'drought_resistance'}		1:96334753-96338420	Zea mays	known
Zm00001d030121	3	{'disease_resistance', 'salt_resistance', 'drought_resistance'}		1:106261999-106265737	Zea mays	known
Zm00001d030173	2	{'disease_resistance', 'salt_resistance'}		1:109460102-109469946	Zea mays	known
Zm00001d030348	2	{'disease_resistance', 'salt_resistance'}		1:124384287-124387721	Zea mays	known
Zm00001d030759	2	{'salt_resistance', 'plant_height_reduce'}		1:160141745-160143817	Zea mays	known
Zm00001d031061	2	{'disease_resistance', 'drought_resistance'}		1:177303347-177308443	Zea mays	known
Zm00001d031086	3	{'disease_resistance', 'salt_resistance', 'drought_resistance'}		1:178629677-178640706	Zea mays	known
Zm00001d031332	2	{'disease_resistance', 'salt_resistance'}		1:188402516-188406719	Zea mays	known
Zm00001d031395	2	{'disease_resistance', 'drought_resistance'}		1:190814038-190817851	Zea mays	known
Zm00001d031445	2	{'disease_resistance', 'salt_resistance'}		1:192273276-192275174	Zea mays	known
Zm00001d031451	3	{'disease_resistance', 'grain_weight_increase', 'plant_height_reduce'}		1:192381738-192385076	Zea mays	known
Zm00001d031485	2	{'disease_resistance', 'salt_resistance'}		1:193615386-193616855	Zea mays	known
Zm00001d031620	2	{'disease_resistance', 'plant_height_reduce'}		1:198353166-198360721	Zea mays	known
Zm00001d031673	2	{'salt_resistance', 'drought_resistance'}		1:200199974-200200558	Zea mays	known
Zm00001d031724	4	{'disease_resistance', 'salt_resistance', 'insect_resistance', 'drought_resistance'}		1:201432590-201441219	Zea mays	known
Zm00001d031730	2	{'disease_resistance', 'drought_resistance'}		1:201807840-201809432	Zea mays	known
Zm00001d031790	2	{'salt_resistance', 'drought_resistance'}		1:203835994-203840690	Zea mays	known
Zm00001d032024	2	{'salt_resistance', 'insect_resistance'}		1:211534996-211535941	Zea mays	known
Zm00001d032049	2	{'salt_resistance', 'drought_resistance'}		1:212563528-212566917	Zea mays	known
Zm00001d032295	2	{'salt_resistance', 'drought_resistance'}		1:222481601-222482389	Zea mays	known
Zm00001d032356	2	{'disease_resistance', 'drought_resistance'}		1:225270286-225278670	Zea mays	known
Zm00001d032776	3	{'disease_resistance', 'salt_resistance', 'drought_resistance'}		1:239980602-239984473	Zea mays	known
Zm00001d032869	3	{'disease_resistance', 'salt_resistance', 'plant_height_reduce'}		1:242985056-242987107	Zea mays	known
Zm00001d033222	3	{'disease_resistance', 'salt_resistance', 'drought_resistance'}		1:257064615-257066429	Zea mays	known
Zm00001d033246	2	{'disease_resistance', 'drought_resistance'}		1:257907929-257912971	Zea mays	known
Zm00001d033316	3	{'disease_resistance', 'salt_resistance', 'drought_resistance'}		1:259739159-259740448	Zea mays	known
Zm00001d033339	3	{'disease_resistance', 'salt_resistance', 'drought_resistance'}		1:261541693-261544074	Zea mays	known
Zm00001d033623	2	{'disease_resistance', 'insect_resistance'}		1:270825199-270829712	Zea mays	known
Zm00001d033624	2	{'disease_resistance', 'insect_resistance'}		1:270833991-270849104	Zea mays	known
Zm00001d033680	3	{'grain_weight_increase', 'salt_resistance', 'plant_height_reduce'}		1:272695461-272697353	Zea mays	known
Zm00001d033747	2	{'grain_weight_increase', 'plant_height_reduce'}		1:274482868-274485631	Zea mays	known
Zm00001d033834	2	{'salt_resistance', 'drought_resistance'}		1:277028565-277030220	Zea mays	known
Zm00001d033876	3	{'disease_resistance', 'grain_weight_increase', 'plant_height_reduce'}		1:278899072-278902510	Zea mays	known
Zm00001d033905	2	{'grain_weight_increase', 'plant_height_reduce'}		1:279904195-279907171	Zea mays	known
Zm00001d033931	2	{'disease_resistance', 'salt_resistance'}		1:280590756-280593742	Zea mays	known
Zm00001d033972	2	{'salt_resistance', 'drought_resistance'}		1:281641532-281642959	Zea mays	known
Zm00001d034047	2	{'disease_resistance', 'plant_height_reduce'}		1:284017137-284025511	Zea mays	known
Zm00001d034161	3	{'disease_resistance', 'salt_resistance', 'drought_resistance'}		1:287105316-287112722	Zea mays	known
Zm00001d034553	3	{'disease_resistance', 'salt_resistance', 'drought_resistance'}		1:297611319-297616513	Zea mays	known
Zm00001d034944	2	{'disease_resistance', 'insect_resistance'}		1:307768282-307773026	Zea mays	known
Zm00001d035285	2	{'disease_resistance', 'salt_resistance'}		6:28646617-28677143	Zea mays	known
Zm00001d035445	3	{'disease_resistance', 'salt_resistance', 'insect_resistance'}		6:32298724-32303051	Zea mays	known
Zm00001d035487	2	{'salt_resistance', 'drought_resistance'}		6:35284218-35330625	Zea mays	known
Zm00001d035629	2	{'disease_resistance', 'insect_resistance'}		6:43779050-43779733	Zea mays	known
Zm00001d035689	3	{'disease_resistance', 'salt_resistance', 'drought_resistance'}		6:47398899-47400113	Zea mays	known
Zm00001d035925	3	{'disease_resistance', 'salt_resistance', 'drought_resistance'}		6:67035654-67038080	Zea mays	known
Zm00001d036345	2	{'disease_resistance', 'salt_resistance'}		6:91643180-91646179	Zea mays	known
Zm00001d036401	2	{'disease_resistance', 'salt_resistance'}		6:93476841-93482008	Zea mays	known
Zm00001d036448	3	{'disease_resistance', 'salt_resistance', 'drought_resistance'}		6:95444918-95449363	Zea mays	known
Zm00001d036541	3	{'disease_resistance', 'salt_resistance', 'drought_resistance'}		6:98627117-98631601	Zea mays	known
Zm00001d036542	3	{'disease_resistance', 'salt_resistance', 'drought_resistance'}		6:98632917-98634555	Zea mays	known
Zm00001d036726	3	{'disease_resistance', 'salt_resistance', 'drought_resistance'}		6:106223945-106225142	Zea mays	known
Zm00001d036900	3	{'disease_resistance', 'salt_resistance', 'drought_resistance'}		6:112937582-112940872	Zea mays	known
Zm00001d037117	3	{'disease_resistance', 'grain_weight_increase', 'plant_height_reduce'}		6:119926200-119927400	Zea mays	known
Zm00001d037118	3	{'salt_resistance', 'insect_resistance', 'drought_resistance'}		6:119939225-119940302	Zea mays	known
Zm00001d037182	2	{'salt_resistance', 'drought_resistance'}		6:121926595-121927826	Zea mays	known
Zm00001d037334	3	{'salt_resistance', 'insect_resistance', 'drought_resistance'}		6:128839648-128840740	Zea mays	known
Zm00001d037636	3	{'disease_resistance', 'salt_resistance', 'drought_resistance'}		6:139382134-139387889	Zea mays	known
Zm00001d037643	2	{'salt_resistance', 'drought_resistance'}		6:139542604-139545550	Zea mays	known
Zm00001d037719	2	{'salt_resistance', 'drought_resistance'}		6:141928354-141931031	Zea mays	known
Zm00001d037737	2	{'disease_resistance', 'plant_height_reduce'}		6:142692343-142700273	Zea mays	known
Zm00001d037840	2	{'disease_resistance', 'grain_weight_increase'}		6:146170257-146186451	Zea mays	known
Zm00001d037941	3	{'disease_resistance', 'salt_resistance', 'drought_resistance'}		6:149622893-149623652	Zea mays	known
Zm00001d038001	2	{'salt_resistance', 'drought_resistance'}		6:151835642-151836388	Zea mays	known
Zm00001d038320	2	{'salt_resistance', 'drought_resistance'}		6:161420420-161421091	Zea mays	known
Zm00001d038522	2	{'disease_resistance', 'salt_resistance'}		6:166459751-166465172	Zea mays	known
Zm00001d038745	2	{'salt_resistance', 'drought_resistance'}		6:171073827-171094831	Zea mays	known
Zm00001d039019	2	{'disease_resistance', 'drought_resistance'}		6:176137009-176137881	Zea mays	known
Zm00001d039044	3	{'disease_resistance', 'salt_resistance', 'drought_resistance'}		6:176484519-176486947	Zea mays	known
Zm00001d039245	3	{'disease_resistance', 'salt_resistance', 'drought_resistance'}		3:1311705-1313831	Zea mays	known
Zm00001d039434	2	{'disease_resistance', 'plant_height_reduce'}		3:4937155-4946172	Zea mays	known
Zm00001d039453	4	{'disease_resistance', 'grain_weight_increase', 'salt_resistance', 'drought_resistance'}		3:5524551-5530334	Zea mays	known
Zm00001d039469	2	{'disease_resistance', 'insect_resistance'}		3:5924323-5928456	Zea mays	known
Zm00001d039532	3	{'disease_resistance', 'salt_resistance', 'drought_resistance'}		3:8161703-8163688	Zea mays	known
Zm00001d039926	2	{'disease_resistance', 'drought_resistance'}		3:20346401-20351059	Zea mays	known
Zm00001d039931	2	{'disease_resistance', 'drought_resistance'}		3:20440308-20450894	Zea mays	known
Zm00001d039933	2	{'disease_resistance', 'salt_resistance'}		3:20467774-20468238	Zea mays	known
Zm00001d039936	2	{'disease_resistance', 'salt_resistance'}		3:20587911-20588369	Zea mays	known
Zm00001d039938	2	{'salt_resistance', 'insect_resistance'}		3:20620312-20621453	Zea mays	known
Zm00001d039963	2	{'disease_resistance', 'drought_resistance'}		3:21436334-21438147	Zea mays	known
Zm00001d040423	2	{'salt_resistance', 'drought_resistance'}		3:43263653-43264773	Zea mays	known
Zm00001d040426	2	{'salt_resistance', 'drought_resistance'}		3:43312995-43313987	Zea mays	known
Zm00001d040554	3	{'disease_resistance', 'salt_resistance', 'drought_resistance'}		3:49965224-49968947	Zea mays	known
Zm00001d040842	2	{'salt_resistance', 'drought_resistance'}		3:70589059-70591162	Zea mays	known
Zm00001d041173	2	{'disease_resistance', 'salt_resistance'}		3:103238434-103242617	Zea mays	known
Zm00001d041204	2	{'disease_resistance', 'insect_resistance'}		3:106505456-106508559	Zea mays	known
Zm00001d041489	2	{'disease_resistance', 'drought_resistance'}		3:124685332-124691424	Zea mays	known
Zm00001d041719	2	{'disease_resistance', 'salt_resistance'}		3:135890632-135900305	Zea mays	known
Zm00001d041777	2	{'disease_resistance', 'salt_resistance'}		3:138200990-138204289	Zea mays	known
Zm00001d041781	2	{'disease_resistance', 'plant_height_reduce'}		3:138838561-138843082	Zea mays	known
Zm00001d042076	3	{'disease_resistance', 'salt_resistance', 'drought_resistance'}		3:150488803-150495326	Zea mays	known
Zm00001d042184	3	{'disease_resistance', 'salt_resistance', 'drought_resistance'}		3:156069210-156070652	Zea mays	known
Zm00001d042215	2	{'salt_resistance', 'drought_resistance'}		3:157119416-157123487	Zea mays	known
Zm00001d042312	2	{'salt_resistance', 'drought_resistance'}		3:161082734-161086936	Zea mays	known
Zm00001d042540	2	{'disease_resistance', 'insect_resistance'}		3:173296713-173300025	Zea mays	known
Zm00001d042541	2	{'disease_resistance', 'insect_resistance'}		3:173440848-173444275	Zea mays	known
Zm00001d042695	3	{'disease_resistance', 'salt_resistance', 'drought_resistance'}		3:179501917-179506824	Zea mays	known
Zm00001d042779	2	{'salt_resistance', 'drought_resistance'}		3:181672231-181673768	Zea mays	known
Zm00001d042886	3	{'disease_resistance', 'salt_resistance', 'drought_resistance'}		3:185094174-185095670	Zea mays	known
Zm00001d043117	2	{'salt_resistance', 'drought_resistance'}		3:191849326-191853276	Zea mays	known
Zm00001d043205	2	{'salt_resistance', 'drought_resistance'}		3:193741300-193742013	Zea mays	known
Zm00001d043252	2	{'disease_resistance', 'salt_resistance'}		3:195514403-195522004	Zea mays	known
Zm00001d043477	3	{'disease_resistance', 'salt_resistance', 'drought_resistance'}		3:203530055-203535235	Zea mays	known
Zm00001d043491	2	{'disease_resistance', 'drought_resistance'}		3:203762701-203763390	Zea mays	known
Zm00001d043598	4	{'disease_resistance', 'salt_resistance', 'insect_resistance', 'drought_resistance'}		3:206783555-206793134	Zea mays	known
Zm00001d043781	2	{'salt_resistance', 'plant_height_reduce'}		3:212066419-212068437	Zea mays	known
Zm00001d043959	2	{'disease_resistance', 'drought_resistance'}		3:216799959-216802502	Zea mays	known
Zm00001d044010	3	{'disease_resistance', 'salt_resistance', 'drought_resistance'}		3:218364253-218365522	Zea mays	known
Zm00001d044065	3	{'grain_weight_increase', 'salt_resistance', 'plant_height_reduce'}		3:220172288-220173715	Zea mays	known
Zm00001d044285	3	{'disease_resistance', 'salt_resistance', 'drought_resistance'}		3:226084083-226087153	Zea mays	known
Zm00001d044301	3	{'disease_resistance', 'salt_resistance', 'drought_resistance'}		3:226455732-226460323	Zea mays	known
Zm00001d044442	4	{'disease_resistance', 'salt_resistance', 'insect_resistance', 'drought_resistance'}		3:230083577-230090715	Zea mays	known
Zm00001d044443	4	{'disease_resistance', 'salt_resistance', 'insect_resistance', 'drought_resistance'}		3:230103997-230111661	Zea mays	known
Zm00001d044708	2	{'salt_resistance', 'drought_resistance'}		3:237368673-237370137	Zea mays	known
Zm00001d044906	2	{'salt_resistance', 'drought_resistance'}				known
Zm00001d044908	2	{'salt_resistance', 'drought_resistance'}				known
Zm00001d044940	2	{'salt_resistance', 'drought_resistance'}		9:9473825-9483694	Zea mays	known
Zm00001d044975	3	{'salt_resistance', 'insect_resistance', 'drought_resistance'}		9:11117280-11118331	Zea mays	known
Zm00001d045064	3	{'disease_resistance', 'salt_resistance', 'drought_resistance'}		9:13254098-13255141	Zea mays	known
Zm00001d045231	2	{'disease_resistance', 'plant_height_reduce'}		9:18636479-18642767	Zea mays	known
Zm00001d045269	2	{'salt_resistance', 'drought_resistance'}		9:19420303-19431299	Zea mays	known
Zm00001d045279	2	{'salt_resistance', 'drought_resistance'}		9:19663121-19666022	Zea mays	known
Zm00001d045310	3	{'disease_resistance', 'salt_resistance', 'drought_resistance'}		9:20685791-20691570	Zea mays	known
Zm00001d045375	3	{'disease_resistance', 'salt_resistance', 'drought_resistance'}		9:21785708-21786581	Zea mays	known
Zm00001d045533	3	{'disease_resistance', 'grain_weight_increase', 'plant_height_reduce'}		9:27727090-27729464	Zea mays	known
Zm00001d046226	2	{'salt_resistance', 'drought_resistance'}		9:75286480-75292272	Zea mays	known
Zm00001d046270	2	{'salt_resistance', 'drought_resistance'}		9:79513155-79514417	Zea mays	known
Zm00001d046388	2	{'salt_resistance', 'drought_resistance'}		9:88644061-88656958	Zea mays	known
Zm00001d046508	2	{'salt_resistance', 'drought_resistance'}		9:95038869-95042208	Zea mays	known
Zm00001d046805	3	{'disease_resistance', 'salt_resistance', 'drought_resistance'}		9:108440898-108442204	Zea mays	known
Zm00001d046865	2	{'salt_resistance', 'drought_resistance'}		9:110420794-110426830	Zea mays	known
Zm00001d047220	3	{'disease_resistance', 'salt_resistance', 'drought_resistance'}		9:126371980-126375986	Zea mays	known
Zm00001d047340	2	{'salt_resistance', 'insect_resistance'}		9:130640482-130641420	Zea mays	known
Zm00001d047533	2	{'disease_resistance', 'salt_resistance'}		9:137560613-137563279	Zea mays	known
Zm00001d047758	3	{'disease_resistance', 'salt_resistance', 'drought_resistance'}		9:144513779-144516518	Zea mays	known
Zm00001d047841	2	{'disease_resistance', 'salt_resistance'}		9:146473068-146473559	Zea mays	known
Zm00001d048050	2	{'grain_weight_increase', 'plant_height_reduce'}		9:152280276-152287742	Zea mays	known
Zm00001d048082	2	{'disease_resistance', 'plant_height_reduce'}		9:152991510-152999233	Zea mays	known
Zm00001d048296	2	{'salt_resistance', 'drought_resistance'}		9:157327869-157328792	Zea mays	known
Zm00001d048297	2	{'salt_resistance', 'drought_resistance'}		9:157365710-157366678	Zea mays	known
Zm00001d048329	2	{'salt_resistance', 'drought_resistance'}		9:157808452-157815587	Zea mays	known
Zm00001d048474	2	{'disease_resistance', 'plant_height_reduce'}		9:160201186-160220021	Zea mays	known
Zm00001d048527	2	{'disease_resistance', 'drought_resistance'}		9:161042578-161049360	Zea mays	known
Zm00001d049059	2	{'disease_resistance', 'salt_resistance'}		4:14486811-14489668	Zea mays	known
Zm00001d049187	3	{'disease_resistance', 'salt_resistance', 'drought_resistance'}		4:20260569-20262092	Zea mays	known
Zm00001d049217	3	{'disease_resistance', 'salt_resistance', 'drought_resistance'}		4:21621322-21622479	Zea mays	known
Zm00001d049510	3	{'disease_resistance', 'salt_resistance', 'drought_resistance'}		4:33207663-33213416	Zea mays	known
Zm00001d049889	2	{'salt_resistance', 'drought_resistance'}		4:51083167-51084225	Zea mays	known
Zm00001d050018	2	{'salt_resistance', 'drought_resistance'}		4:60275297-60279764	Zea mays	known
Zm00001d050021	2	{'salt_resistance', 'drought_resistance'}		4:60545224-60550158	Zea mays	known
Zm00001d050107	2	{'salt_resistance', 'drought_resistance'}		4:66336547-66339803	Zea mays	known
Zm00001d050139	2	{'salt_resistance', 'drought_resistance'}		4:68666761-68671846	Zea mays	known
Zm00001d050164	2	{'disease_resistance', 'drought_resistance'}		4:70417039-70420508	Zea mays	known
Zm00001d050861	2	{'disease_resistance', 'salt_resistance'}		4:129212035-129213360	Zea mays	known
Zm00001d051388	2	{'disease_resistance', 'insect_resistance'}		4:158650748-158652335	Zea mays	known
Zm00001d051456	3	{'disease_resistance', 'grain_weight_increase', 'plant_height_reduce'}		4:161116413-161117330	Zea mays	known
Zm00001d051520	2	{'salt_resistance', 'insect_resistance'}		4:162987191-162988454	Zea mays	known
Zm00001d051554	2	{'salt_resistance', 'drought_resistance'}		4:164796481-164798484	Zea mays	known
Zm00001d051615	2	{'salt_resistance', 'drought_resistance'}		4:166721047-166727955	Zea mays	known
Zm00001d051804	2	{'grain_weight_increase', 'plant_height_reduce'}		4:172173109-172175882	Zea mays	known
Zm00001d052112	2	{'disease_resistance', 'plant_height_reduce'}		4:182168392-182169820	Zea mays	known
Zm00001d052229	2	{'salt_resistance', 'drought_resistance'}		4:185992272-185993222	Zea mays	known
Zm00001d052380	2	{'disease_resistance', 'salt_resistance'}		4:190694573-190697426	Zea mays	known
Zm00001d052416	3	{'disease_resistance', 'salt_resistance', 'drought_resistance'}		4:191435896-191439625	Zea mays	known
Zm00001d052544	3	{'disease_resistance', 'salt_resistance', 'drought_resistance'}		4:194606676-194607959	Zea mays	known
Zm00001d052726	4	{'disease_resistance', 'salt_resistance', 'insect_resistance', 'drought_resistance'}		4:200960426-200974045	Zea mays	known
Zm00001d052809	2	{'disease_resistance', 'salt_resistance'}		4:203484822-203489013	Zea mays	known
Zm00001d052855	2	{'disease_resistance', 'salt_resistance'}		4:204474656-204478419	Zea mays	known
Zm00001d052890	3	{'disease_resistance', 'grain_weight_increase', 'plant_height_reduce'}		4:205414539-205418226	Zea mays	known
Zm00001d053016	2	{'disease_resistance', 'salt_resistance'}		4:210943117-210946017	Zea mays	known
Zm00001d053210	3	{'salt_resistance', 'insect_resistance', 'drought_resistance'}		4:223202619-223204360	Zea mays	known
Zm00001d053220	3	{'salt_resistance', 'insect_resistance', 'drought_resistance'}		4:223627412-223628309	Zea mays	known
Zm00001d053595	2	{'salt_resistance', 'drought_resistance'}		4:239228838-239235251	Zea mays	known
Zm00001d053612	4	{'disease_resistance', 'salt_resistance', 'insect_resistance', 'drought_resistance'}		4:239878042-239884383	Zea mays	known
Zm00001d053675	2	{'disease_resistance', 'insect_resistance'}		4:242141645-242145002	Zea mays	known
Zm00001d053746	3	{'disease_resistance', 'salt_resistance', 'drought_resistance'}		4:243667016-243668079	Zea mays	known
Zm00001d054044	2	{'salt_resistance', 'drought_resistance'}		4:248819832-248821520	Zea mays	known
Zm00001d054079	2	{'disease_resistance', 'salt_resistance'}		4:249270701-249274220	Zea mays	known
Zm00001d023615	3	{'disease_resistance', 'salt_resistance', 'drought_resistance'}	WRKY DNA -binding domain (WRKY)	10:12201890..12203553	Zea mays	known
Zm00001d035625	2	{'disease_resistance', 'insect_resistance'}	ACTIN-DEPOLYMERIZING FACTOR 10-RELATED	6:37482837..37483682	Zea mays	known
