# Supplementary material for: A new model construction based on the knowledge graph for mining elite polyphenotype genes in crops
Source: Front Plant Sci. 2024 Mar 20;15:1361716. doi: 10.3389/fpls.2024.1361716 (PMC10987776; doi:10.3389/fpls.2024.1361716)
Supplement: Supplementary file 2 [file DataSheet_2.xlsx]

## Sheet: Sheet1
Table S2 List of unknown functional polyphenotype genes
Ensembl plant: https://plants.ensembl.org/index.html search to verify the results
GeneID	Predicted-trait numbers	Predicted-trait	Location	Species	label
AT1G11303	2	{'disease_resistance', 'salt_resistance'}	1:3797667-3800851	Arabidopsis thaliana	unknown
AT1G17910	2	{'disease_resistance', 'drought_resistance'}	1:6159126-6161615	Arabidopsis thaliana	unknown
AT1G29110	3	{'disease_resistance', 'salt_resistance', 'drought_resistance'}	1:10171683-10173071	Arabidopsis thaliana	unknown
AT1G70110	3	{'disease_resistance', 'salt_resistance', 'plant_height_reduce'}	1:26406238-26408343	Arabidopsis thaliana	unknown
AT2G14510	2	{'disease_resistance', 'grain_weight_increase'}	2:6170942-6175095	Arabidopsis thaliana	unknown
AT2G29250	2	{'salt_resistance', 'plant_height_reduce'}	2:12578909-12580780	Arabidopsis thaliana	unknown
AT2G43690	2	{'salt_resistance', 'plant_height_reduce'}	2:18112026-18114834	Arabidopsis thaliana	unknown
AT2G43700	3	{'disease_resistance', 'salt_resistance', 'plant_height_reduce'}	2:18115064-18118878	Arabidopsis thaliana	unknown
AT3G25490	2	{'disease_resistance', 'drought_resistance'}	3:9241725-9243485	Arabidopsis thaliana	unknown
AT3G45420	2	{'salt_resistance', 'plant_height_reduce'}	3:16656773-16660240	Arabidopsis thaliana	unknown
AT3G45440	2	{'salt_resistance', 'plant_height_reduce'}	3:16664611-16667747	Arabidopsis thaliana	unknown
AT3G45990	2	{'disease_resistance', 'insect_resistance'}	3:16900778-16904136	Arabidopsis thaliana	unknown
AT4G31100	2	{'disease_resistance', 'drought_resistance'}	4:15123763-15126884	Arabidopsis thaliana	unknown
AT5G10680	2	{'salt_resistance', 'drought_resistance'}	5:3373224-3374414	Arabidopsis thaliana	unknown
AT5G44660	2	{'salt_resistance', 'drought_resistance'}	5:18015522-18017307	Arabidopsis thaliana	unknown
AT5G59260	2	{'salt_resistance', 'plant_height_reduce'}	5:23907786-23910082	Arabidopsis thaliana	unknown
AT5G59270	2	{'salt_resistance', 'plant_height_reduce'}	5:23910985-23913374	Arabidopsis thaliana	unknown
LOC_Os01g01470	3	{'disease_resistance', 'salt_resistance', 'drought_resistance'}	1:241641-243468	Oryza sativa Japonica Group	unknown
LOC_Os01g04280	2	{'disease_resistance', 'drought_resistance'}	1:1902736-1905247	Oryza sativa Japonica Group	unknown
LOC_Os01g04340	2	{'disease_resistance', 'salt_resistance'}	1:1934117-1935048	Oryza sativa Japonica Group	unknown
LOC_Os01g04360	2	{'disease_resistance', 'salt_resistance'}	1:1944247-1945035	Oryza sativa Japonica Group	unknown
LOC_Os01g04370	2	{'disease_resistance', 'salt_resistance'}	1:1948737-1949587	Oryza sativa Japonica Group	unknown
LOC_Os01g04380	2	{'disease_resistance', 'salt_resistance'}	1:1951928-1952771	Oryza sativa Japonica Group	unknown
LOC_Os01g04409	2	{'disease_resistance', 'drought_resistance'}	1:1957777-1967451	Oryza sativa Japonica Group	unknown
LOC_Os01g04450	2	{'disease_resistance', 'drought_resistance'}	1:1977423-1982484	Oryza sativa Japonica Group	unknown
LOC_Os01g07400	2	{'salt_resistance', 'drought_resistance'}	1:3505665-3510531	Oryza sativa Japonica Group	unknown
LOC_Os01g07630	2	{'disease_resistance', 'grain_weight_increase'}	1:3667439-3673065	Oryza sativa Japonica Group	unknown
LOC_Os01g07760	2	{'salt_resistance', 'drought_resistance'}	1:3724314-3729284	Oryza sativa Japonica Group	unknown
LOC_Os01g07870	2	{'salt_resistance', 'drought_resistance'}	1:3804528-3811030	Oryza sativa Japonica Group	unknown
LOC_Os01g09080	3	{'disease_resistance', 'salt_resistance', 'drought_resistance'}	1:4566304-4568617	Oryza sativa Japonica Group	unknown
LOC_Os01g10040	2	{'disease_resistance', 'grain_weight_increase'}	1:5236623-5244520	Oryza sativa Japonica Group	unknown
LOC_Os01g10320	2	{'disease_resistance', 'drought_resistance'}	1:5426518-5430614	Oryza sativa Japonica Group	unknown
LOC_Os01g10504	2	{'disease_resistance', 'plant_height_reduce'}	1:5559548-5568844	Oryza sativa Japonica Group	unknown
LOC_Os01g10870	2	{'salt_resistance', 'drought_resistance'}	1:5799607-5801142	Oryza sativa Japonica Group	unknown
LOC_Os01g10890	3	{'disease_resistance', 'salt_resistance', 'drought_resistance'}	1:5809557-5811617	Oryza sativa Japonica Group	unknown
LOC_Os01g12160	2	{'disease_resistance', 'insect_resistance'}	1:6624963-6630463	Oryza sativa Japonica Group	unknown
LOC_Os01g12680	2	{'salt_resistance', 'drought_resistance'}	1:6987901-6994006	Oryza sativa Japonica Group	unknown
LOC_Os01g15640	2	{'salt_resistance', 'drought_resistance'}	1:8792646-8797363	Oryza sativa Japonica Group	unknown
LOC_Os01g18584	3	{'disease_resistance', 'salt_resistance', 'drought_resistance'}	1:10470540-10478800	Oryza sativa Japonica Group	unknown
LOC_Os01g18800	3	{'disease_resistance', 'salt_resistance', 'drought_resistance'}	1:10622795-10627552	Oryza sativa Japonica Group	unknown
LOC_Os01g22670	2	{'salt_resistance', 'drought_resistance'}	1:12745130-12747081	Oryza sativa Japonica Group	unknown
LOC_Os01g24560	3	{'disease_resistance', 'salt_resistance', 'drought_resistance'}	1:13842272-13843749	Oryza sativa Japonica Group	unknown
LOC_Os01g25386	2	{'salt_resistance', 'drought_resistance'}	1:14340133-14357449	Oryza sativa Japonica Group	unknown
LOC_Os01g26210	2	{'disease_resistance', 'drought_resistance'}	1:14856098-14858270	Oryza sativa Japonica Group	unknown
LOC_Os01g27230	2	{'salt_resistance', 'drought_resistance'}	1:15185076-15188301	Oryza sativa Japonica Group	unknown
LOC_Os01g27240	2	{'salt_resistance', 'drought_resistance'}	1:15192860-15195698	Oryza sativa Japonica Group	unknown
LOC_Os01g28840	2	{'salt_resistance', 'drought_resistance'}	1:16151540-16154058	Oryza sativa Japonica Group	unknown
LOC_Os01g29840	3	{'disease_resistance', 'salt_resistance', 'drought_resistance'}	1:16720504-16722617	Oryza sativa Japonica Group	unknown
LOC_Os01g32660	3	{'disease_resistance', 'salt_resistance', 'drought_resistance'}	1:17904775-17910174	Oryza sativa Japonica Group	unknown
LOC_Os01g39770	3	{'disease_resistance', 'salt_resistance', 'drought_resistance'}	1:22427831-22430870	Oryza sativa Japonica Group	unknown
LOC_Os01g40400	2	{'salt_resistance', 'drought_resistance'}	1:22808698-22810686	Oryza sativa Japonica Group	unknown
LOC_Os01g41510	3	{'disease_resistance', 'salt_resistance', 'drought_resistance'}	1:23498443-23502377	Oryza sativa Japonica Group	unknown
LOC_Os01g42780	3	{'disease_resistance', 'salt_resistance', 'drought_resistance'}	1:24343518-24345173	Oryza sativa Japonica Group	unknown
LOC_Os01g43410	2	{'disease_resistance', 'salt_resistance'}	1:24839124-24843618	Oryza sativa Japonica Group	unknown
LOC_Os01g43910	3	{'disease_resistance', 'salt_resistance', 'drought_resistance'}	1:25152102-25158379	Oryza sativa Japonica Group	unknown
LOC_Os01g45620	3	{'disease_resistance', 'salt_resistance', 'drought_resistance'}	1:25917623-25922978	Oryza sativa Japonica Group	unknown
LOC_Os01g45860	3	{'grain_weight_increase', 'salt_resistance', 'plant_height_reduce'}	1:26044166-26045843	Oryza sativa Japonica Group	unknown
LOC_Os01g45990	2	{'salt_resistance', 'insect_resistance'}	1:26119708-26126165	Oryza sativa Japonica Group	unknown
LOC_Os01g46760	3	{'disease_resistance', 'salt_resistance', 'drought_resistance'}	1:26652944-26658313	Oryza sativa Japonica Group	unknown
LOC_Os01g46800	4	{'disease_resistance', 'salt_resistance', 'insect_resistance', 'drought_resistance'}	1:26687377-26688416	Oryza sativa Japonica Group	unknown
LOC_Os01g47530	3	{'disease_resistance', 'salt_resistance', 'drought_resistance'}	1:27171287-27178431	Oryza sativa Japonica Group	unknown
LOC_Os01g49529	2	{'disease_resistance', 'drought_resistance'}	1:28482011-28496267	Oryza sativa Japonica Group	unknown
LOC_Os01g51450	2	{'disease_resistance', 'salt_resistance'}	1:29580715-29583174	Oryza sativa Japonica Group	unknown
LOC_Os01g54620	3	{'disease_resistance', 'salt_resistance', 'drought_resistance'}	1:31422946-31428688	Oryza sativa Japonica Group	unknown
LOC_Os01g54890	2	{'disease_resistance', 'drought_resistance'}	1:31567891-31568741	Oryza sativa Japonica Group	unknown
LOC_Os01g55200	2	{'salt_resistance', 'insect_resistance'}	1:31761223-31763887	Oryza sativa Japonica Group	unknown
LOC_Os01g55450	3	{'disease_resistance', 'salt_resistance', 'drought_resistance'}	1:31943528-31948580	Oryza sativa Japonica Group	unknown
LOC_Os01g57480	2	{'disease_resistance', 'salt_resistance'}	1:33210230-33216333	Oryza sativa Japonica Group	unknown
LOC_Os01g57510	2	{'disease_resistance', 'salt_resistance'}	1:33227652-33231771	Oryza sativa Japonica Group	unknown
LOC_Os01g57560	2	{'disease_resistance', 'salt_resistance'}	1:33248875-33256713	Oryza sativa Japonica Group	unknown
LOC_Os01g58420	2	{'salt_resistance', 'drought_resistance'}	1:33766979-33768085	Oryza sativa Japonica Group	unknown
LOC_Os01g58470	2	{'salt_resistance', 'drought_resistance'}	1:33803154-33805393	Oryza sativa Japonica Group	unknown
LOC_Os01g59360	2	{'disease_resistance', 'salt_resistance'}	1:34325310-34328118	Oryza sativa Japonica Group	unknown
LOC_Os01g59760	2	{'salt_resistance', 'drought_resistance'}	1:34565292-34568290	Oryza sativa Japonica Group	unknown
LOC_Os01g60020	4	{'disease_resistance', 'grain_weight_increase', 'salt_resistance', 'drought_resistance'}	1:34692830-34694391	Oryza sativa Japonica Group	unknown
LOC_Os01g60910	3	{'disease_resistance', 'salt_resistance', 'drought_resistance'}	1:35228867-35234373	Oryza sativa Japonica Group	unknown
LOC_Os01g61210	2	{'salt_resistance', 'drought_resistance'}	1:35421033-35421659	Oryza sativa Japonica Group	unknown
LOC_Os01g61590	2	{'disease_resistance', 'salt_resistance'}	1:35619684-35625793	Oryza sativa Japonica Group	unknown
LOC_Os01g62760	3	{'disease_resistance', 'salt_resistance', 'drought_resistance'}	1:36343948-36346078	Oryza sativa Japonica Group	unknown
LOC_Os01g62840	2	{'disease_resistance', 'salt_resistance'}	1:36395486-36398185	Oryza sativa Japonica Group	unknown
LOC_Os01g63160	2	{'salt_resistance', 'drought_resistance'}	1:36606535-36608135	Oryza sativa Japonica Group	unknown
LOC_Os01g64000	2	{'salt_resistance', 'drought_resistance'}	1:37174547-37176550	Oryza sativa Japonica Group	unknown
LOC_Os01g64970	3	{'disease_resistance', 'salt_resistance', 'drought_resistance'}	1:37710241-37715296	Oryza sativa Japonica Group	unknown
LOC_Os01g66290	2	{'disease_resistance', 'plant_height_reduce'}	1:38500880-38505127	Oryza sativa Japonica Group	unknown
LOC_Os01g67160	3	{'disease_resistance', 'salt_resistance', 'drought_resistance'}	1:38981302-38984078	Oryza sativa Japonica Group	unknown
LOC_Os01g67580	2	{'salt_resistance', 'drought_resistance'}	1:39275857-39282884	Oryza sativa Japonica Group	unknown
LOC_Os01g67980	3	{'disease_resistance', 'salt_resistance', 'drought_resistance'}	1:39501330-39502978	Oryza sativa Japonica Group	unknown
LOC_Os01g68870	2	{'grain_weight_increase', 'plant_height_reduce'}	1:40016601-40023861	Oryza sativa Japonica Group	unknown
LOC_Os01g69910	2	{'salt_resistance', 'insect_resistance'}	1:40397303-40403249	Oryza sativa Japonica Group	unknown
LOC_Os01g69920	3	{'disease_resistance', 'salt_resistance', 'drought_resistance'}	1:40403715-40409615	Oryza sativa Japonica Group	unknown
LOC_Os01g70780	2	{'salt_resistance', 'drought_resistance'}	1:40966659-40971092	Oryza sativa Japonica Group	unknown
LOC_Os01g73980	3	{'disease_resistance', 'salt_resistance', 'drought_resistance'}	1:42855657-42857466	Oryza sativa Japonica Group	unknown
LOC_Os02g01440	2	{'disease_resistance', 'salt_resistance'}	2:261348-265491	Oryza sativa Japonica Group	unknown
LOC_Os02g02790	2	{'salt_resistance', 'drought_resistance'}	2:1061877-1066213	Oryza sativa Japonica Group	unknown
LOC_Os02g03060	3	{'disease_resistance', 'salt_resistance', 'drought_resistance'}	2:1207635-1211226	Oryza sativa Japonica Group	unknown
LOC_Os02g03410	2	{'disease_resistance', 'salt_resistance'}	2:1387873-1394417	Oryza sativa Japonica Group	unknown
LOC_Os02g04230	3	{'disease_resistance', 'salt_resistance', 'drought_resistance'}	2:1850954-1858237	Oryza sativa Japonica Group	unknown
LOC_Os02g05480	3	{'disease_resistance', 'salt_resistance', 'drought_resistance'}	2:2642977-2646360	Oryza sativa Japonica Group	unknown
LOC_Os02g06570	3	{'disease_resistance', 'salt_resistance', 'drought_resistance'}	2:3283212-3286408	Oryza sativa Japonica Group	unknown
LOC_Os02g07430	2	{'disease_resistance', 'plant_height_reduce'}	2:3833129-3837135	Oryza sativa Japonica Group	unknown
LOC_Os02g10120	2	{'disease_resistance', 'insect_resistance'}	2:5276620-5282626	Oryza sativa Japonica Group	unknown
LOC_Os02g12350	2	{'salt_resistance', 'drought_resistance'}	2:6424555-6430620	Oryza sativa Japonica Group	unknown
LOC_Os02g12380	2	{'salt_resistance', 'drought_resistance'}	2:6447078-6453173	Oryza sativa Japonica Group	unknown
LOC_Os02g12810	2	{'disease_resistance', 'drought_resistance'}	2:6726340-6733499	Oryza sativa Japonica Group	unknown
LOC_Os02g13330	2	{'salt_resistance', 'drought_resistance'}	2:7111106-7111729	Oryza sativa Japonica Group	unknown
LOC_Os02g14120	2	{'disease_resistance', 'grain_weight_increase'}	2:7710512-7715739	Oryza sativa Japonica Group	unknown
LOC_Os02g14840	2	{'salt_resistance', 'insect_resistance'}	2:8244347-8248444	Oryza sativa Japonica Group	unknown
LOC_Os02g15620	2	{'salt_resistance', 'drought_resistance'}	2:8779575-8781623	Oryza sativa Japonica Group	unknown
LOC_Os02g17920	2	{'disease_resistance', 'salt_resistance'}	2:10378455-10380939	Oryza sativa Japonica Group	unknown
LOC_Os02g18320	2	{'disease_resistance', 'grain_weight_increase'}	2:10634660-10641098	Oryza sativa Japonica Group	unknown
LOC_Os02g18670	2	{'salt_resistance', 'drought_resistance'}	2:10880504-10886278	Oryza sativa Japonica Group	unknown
LOC_Os02g18880	3	{'disease_resistance', 'salt_resistance', 'drought_resistance'}	2:11015828-11017808	Oryza sativa Japonica Group	unknown
LOC_Os02g18930	3	{'disease_resistance', 'salt_resistance', 'drought_resistance'}	2:11057896-11059975	Oryza sativa Japonica Group	unknown
LOC_Os02g19530	2	{'salt_resistance', 'plant_height_reduce'}	2:11411033-11413084	Oryza sativa Japonica Group	unknown
LOC_Os02g19550	2	{'salt_resistance', 'plant_height_reduce'}	2:11427544-11429904	Oryza sativa Japonica Group	unknown
LOC_Os02g27030	2	{'salt_resistance', 'drought_resistance'}	2:15891528-15895297	Oryza sativa Japonica Group	unknown
LOC_Os02g27880	3	{'disease_resistance', 'salt_resistance', 'drought_resistance'}	2:16501756-16507241	Oryza sativa Japonica Group	unknown
LOC_Os02g27940	3	{'disease_resistance', 'salt_resistance', 'drought_resistance'}	2:16530749-16534064	Oryza sativa Japonica Group	unknown
LOC_Os02g32610	2	{'disease_resistance', 'drought_resistance'}	2:19324219-19332134	Oryza sativa Japonica Group	unknown
LOC_Os02g34270	2	{'salt_resistance', 'drought_resistance'}	2:20498875-20499876	Oryza sativa Japonica Group	unknown
LOC_Os02g34600	3	{'disease_resistance', 'salt_resistance', 'drought_resistance'}	2:20746262-20751379	Oryza sativa Japonica Group	unknown
LOC_Os02g35310	2	{'salt_resistance', 'drought_resistance'}	2:21228952-21231366	Oryza sativa Japonica Group	unknown
LOC_Os02g35470	2	{'disease_resistance', 'drought_resistance'}	2:21319925-21325122	Oryza sativa Japonica Group	unknown
LOC_Os02g36924	2	{'disease_resistance', 'plant_height_reduce'}	2:22294657-22301808	Oryza sativa Japonica Group	unknown
LOC_Os02g39930	2	{'salt_resistance', 'drought_resistance'}	2:24152112-24153073	Oryza sativa Japonica Group	unknown
LOC_Os02g41500	2	{'disease_resistance', 'drought_resistance'}	2:24871746-24874211	Oryza sativa Japonica Group	unknown
LOC_Os02g42110	2	{'disease_resistance', 'drought_resistance'}	2:25317197-25321441	Oryza sativa Japonica Group	unknown
LOC_Os02g42150	2	{'disease_resistance', 'drought_resistance'}	2:25348221-25351742	Oryza sativa Japonica Group	unknown
LOC_Os02g42520	2	{'disease_resistance', 'salt_resistance'}	2:25565860-25569036	Oryza sativa Japonica Group	unknown
LOC_Os02g42780	3	{'disease_resistance', 'salt_resistance', 'plant_height_reduce'}	2:25723955-25726082	Oryza sativa Japonica Group	unknown
LOC_Os02g43790	3	{'disease_resistance', 'salt_resistance', 'drought_resistance'}	2:26422182-26423485	Oryza sativa Japonica Group	unknown
LOC_Os02g43820	3	{'disease_resistance', 'salt_resistance', 'drought_resistance'}	2:26456450-26457994	Oryza sativa Japonica Group	unknown
LOC_Os02g44470	2	{'disease_resistance', 'insect_resistance'}	2:26920271-26921900	Oryza sativa Japonica Group	unknown
LOC_Os02g45280	2	{'disease_resistance', 'grain_weight_increase'}	2:27507229-27511091	Oryza sativa Japonica Group	unknown
LOC_Os02g45380	2	{'disease_resistance', 'drought_resistance'}	2:27591163-27593013	Oryza sativa Japonica Group	unknown
LOC_Os02g45450	2	{'salt_resistance', 'drought_resistance'}	2:27652935-27654206	Oryza sativa Japonica Group	unknown
LOC_Os02g45570	3	{'disease_resistance', 'grain_weight_increase', 'plant_height_reduce'}	2:27727642-27728982	Oryza sativa Japonica Group	unknown
LOC_Os02g45770	2	{'disease_resistance', 'plant_height_reduce'}	2:27875979-27884079	Oryza sativa Japonica Group	unknown
LOC_Os02g46090	2	{'disease_resistance', 'salt_resistance'}	2:28086381-28092152	Oryza sativa Japonica Group	unknown
LOC_Os02g47220	2	{'disease_resistance', 'salt_resistance'}	2:28820795-28826658	Oryza sativa Japonica Group	unknown
LOC_Os02g47470	2	{'salt_resistance', 'drought_resistance'}	2:28995717-28998581	Oryza sativa Japonica Group	unknown
LOC_Os02g47510	3	{'disease_resistance', 'salt_resistance', 'drought_resistance'}	2:29026070-29028259	Oryza sativa Japonica Group	unknown
LOC_Os02g48450	3	{'disease_resistance', 'salt_resistance', 'drought_resistance'}	2:29667743-29669662	Oryza sativa Japonica Group	unknown
LOC_Os02g49840	2	{'disease_resistance', 'plant_height_reduce'}	2:30456666-30462759	Oryza sativa Japonica Group	unknown
LOC_Os02g50480	3	{'disease_resistance', 'salt_resistance', 'drought_resistance'}	2:30823545-30829508	Oryza sativa Japonica Group	unknown
LOC_Os02g52340	2	{'disease_resistance', 'plant_height_reduce'}	2:32038902-32045130	Oryza sativa Japonica Group	unknown
LOC_Os02g52670	3	{'disease_resistance', 'salt_resistance', 'drought_resistance'}	2:32204392-32205335	Oryza sativa Japonica Group	unknown
LOC_Os02g53100	3	{'disease_resistance', 'salt_resistance', 'drought_resistance'}	2:32489017-32495070	Oryza sativa Japonica Group	unknown
LOC_Os02g53690	3	{'disease_resistance', 'grain_weight_increase', 'plant_height_reduce'}	2:32840362-32842456	Oryza sativa Japonica Group	unknown
LOC_Os02g54160	2	{'salt_resistance', 'drought_resistance'}	2:33199804-33202684	Oryza sativa Japonica Group	unknown
LOC_Os02g54600	3	{'disease_resistance', 'salt_resistance', 'drought_resistance'}	2:33442069-33443948	Oryza sativa Japonica Group	unknown
LOC_Os02g57040	2	{'disease_resistance', 'salt_resistance'}	2:34930270-34934184	Oryza sativa Japonica Group	unknown
LOC_Os02g58520	2	{'disease_resistance', 'salt_resistance'}	2:35775030-35777266	Oryza sativa Japonica Group	unknown
LOC_Os03g01820	2	{'disease_resistance', 'drought_resistance'}	3:499917-501855	Oryza sativa Japonica Group	unknown
LOC_Os03g01890	2	{'disease_resistance', 'drought_resistance'}	3:549823-557909	Oryza sativa Japonica Group	unknown
LOC_Os03g02680	3	{'disease_resistance', 'salt_resistance', 'drought_resistance'}	3:997600-1001243	Oryza sativa Japonica Group	unknown
LOC_Os03g02740	2	{'salt_resistance', 'drought_resistance'}	3:1027577-1031646	Oryza sativa Japonica Group	unknown
LOC_Os03g02800	3	{'grain_weight_increase', 'salt_resistance', 'drought_resistance'}	3:1089162-1093720	Oryza sativa Japonica Group	unknown
LOC_Os03g03510	3	{'disease_resistance', 'salt_resistance', 'drought_resistance'}	3:1514622-1519297	Oryza sativa Japonica Group	unknown
LOC_Os03g03660	2	{'disease_resistance', 'salt_resistance'}	3:1624879-1629530	Oryza sativa Japonica Group	unknown
LOC_Os03g04070	2	{'salt_resistance', 'drought_resistance'}	3:1862352-1864245	Oryza sativa Japonica Group	unknown
LOC_Os03g04920	2	{'salt_resistance', 'drought_resistance'}	3:2367849-2374516	Oryza sativa Japonica Group	unknown
LOC_Os03g05590	3	{'disease_resistance', 'salt_resistance', 'drought_resistance'}	3:2800290-2800924	Oryza sativa Japonica Group	unknown
LOC_Os03g06410	2	{'disease_resistance', 'drought_resistance'}	3:3201312-3208299	Oryza sativa Japonica Group	unknown
LOC_Os03g07830	2	{'salt_resistance', 'drought_resistance'}	3:3984900-3985856	Oryza sativa Japonica Group	unknown
LOC_Os03g08220	2	{'disease_resistance', 'insect_resistance'}	3:4187107-4193539	Oryza sativa Japonica Group	unknown
LOC_Os03g08470	3	{'disease_resistance', 'salt_resistance', 'drought_resistance'}	3:4348670-4350541	Oryza sativa Japonica Group	unknown
LOC_Os03g09020	2	{'disease_resistance', 'salt_resistance'}	3:4682685-4685130	Oryza sativa Japonica Group	unknown
LOC_Os03g09100	2	{'salt_resistance', 'insect_resistance'}	3:4726139-4734011	Oryza sativa Japonica Group	unknown
LOC_Os03g09170	2	{'salt_resistance', 'drought_resistance'}	3:4780241-4781570	Oryza sativa Japonica Group	unknown
LOC_Os03g11420	2	{'disease_resistance', 'salt_resistance'}	3:5876244-5883304	Oryza sativa Japonica Group	unknown
LOC_Os03g11614	2	{'disease_resistance', 'plant_height_reduce'}	3:6052750-6061369	Oryza sativa Japonica Group	unknown
LOC_Os03g12470	2	{'disease_resistance', 'drought_resistance'}	3:6589671-6594037	Oryza sativa Japonica Group	unknown
LOC_Os03g12790	2	{'disease_resistance', 'drought_resistance'}	3:6853791-6856384	Oryza sativa Japonica Group	unknown
LOC_Os03g15250	3	{'disease_resistance', 'salt_resistance', 'plant_height_reduce'}	3:8339941-8344641	Oryza sativa Japonica Group	unknown
LOC_Os03g15960	2	{'disease_resistance', 'salt_resistance'}	3:8805567-8806601	Oryza sativa Japonica Group	unknown
LOC_Os03g16010	2	{'disease_resistance', 'grain_weight_increase'}	3:8827645-8833588	Oryza sativa Japonica Group	unknown
LOC_Os03g16020	2	{'disease_resistance', 'salt_resistance'}	3:8833913-8834377	Oryza sativa Japonica Group	unknown
LOC_Os03g16030	2	{'disease_resistance', 'salt_resistance'}	3:8834823-8835802	Oryza sativa Japonica Group	unknown
LOC_Os03g16040	2	{'disease_resistance', 'salt_resistance'}	3:8838031-8838510	Oryza sativa Japonica Group	unknown
LOC_Os03g16150	2	{'disease_resistance', 'salt_resistance'}	3:8909153-8912958	Oryza sativa Japonica Group	unknown
LOC_Os03g16170	3	{'disease_resistance', 'salt_resistance', 'drought_resistance'}	3:8921370-8923437	Oryza sativa Japonica Group	unknown
LOC_Os03g17980	3	{'disease_resistance', 'salt_resistance', 'drought_resistance'}	3:10006387-10012024	Oryza sativa Japonica Group	unknown
LOC_Os03g18600	2	{'salt_resistance', 'drought_resistance'}	3:10418634-10419919	Oryza sativa Japonica Group	unknown
LOC_Os03g20380	3	{'disease_resistance', 'salt_resistance', 'drought_resistance'}	3:11526272-11531983	Oryza sativa Japonica Group	unknown
LOC_Os03g20780	2	{'disease_resistance', 'salt_resistance'}	3:11771261-11773192	Oryza sativa Japonica Group	unknown
LOC_Os03g21710	3	{'disease_resistance', 'salt_resistance', 'drought_resistance'}	3:12394669-12396898	Oryza sativa Japonica Group	unknown
LOC_Os03g22050	3	{'disease_resistance', 'salt_resistance', 'drought_resistance'}	3:12630705-12635182	Oryza sativa Japonica Group	unknown
LOC_Os03g27080	2	{'salt_resistance', 'insect_resistance'}	3:15504379-15507731	Oryza sativa Japonica Group	unknown
LOC_Os03g27280	3	{'disease_resistance', 'salt_resistance', 'drought_resistance'}	3:15628100-15632465	Oryza sativa Japonica Group	unknown
LOC_Os03g27370	2	{'salt_resistance', 'drought_resistance'}	3:15673720-15679214	Oryza sativa Japonica Group	unknown
LOC_Os03g31300	2	{'salt_resistance', 'drought_resistance'}	3:17832202-17839322	Oryza sativa Japonica Group	unknown
LOC_Os03g32160	2	{'disease_resistance', 'drought_resistance'}	3:18397036-18401598	Oryza sativa Japonica Group	unknown
LOC_Os03g35600	2	{'disease_resistance', 'salt_resistance'}			unknown
LOC_Os03g40540	3	{'grain_weight_increase', 'salt_resistance', 'drought_resistance'}	3:22538341-22542520	Oryza sativa Japonica Group	unknown
LOC_Os03g43440	2	{'disease_resistance', 'salt_resistance'}	3:24226224-24227930	Oryza sativa Japonica Group	unknown
LOC_Os03g43930	2	{'disease_resistance', 'drought_resistance'}	3:24651800-24657650	Oryza sativa Japonica Group	unknown
LOC_Os03g44150	2	{'disease_resistance', 'salt_resistance'}	3:24810051-24818067	Oryza sativa Japonica Group	unknown
LOC_Os03g47140	3	{'disease_resistance', 'grain_weight_increase', 'plant_height_reduce'}	3:26679039-26682188	Oryza sativa Japonica Group	unknown
LOC_Os03g48270	2	{'disease_resistance', 'salt_resistance'}	3:27467403-27472759	Oryza sativa Japonica Group	unknown
LOC_Os03g49180	2	{'disease_resistance', 'salt_resistance'}	3:28014964-28018874	Oryza sativa Japonica Group	unknown
LOC_Os03g49260	2	{'disease_resistance', 'insect_resistance'}	3:28049441-28053725	Oryza sativa Japonica Group	unknown
LOC_Os03g49380	2	{'disease_resistance', 'insect_resistance'}	3:28106903-28113300	Oryza sativa Japonica Group	unknown
LOC_Os03g49400	2	{'grain_weight_increase', 'salt_resistance'}	3:28116620-28124217	Oryza sativa Japonica Group	unknown
LOC_Os03g49990	3	{'grain_weight_increase', 'salt_resistance', 'plant_height_reduce'}	3:28512625-28515179	Oryza sativa Japonica Group	unknown
LOC_Os03g50490	2	{'grain_weight_increase', 'plant_height_reduce'}	3:28822405-28826521	Oryza sativa Japonica Group	unknown
LOC_Os03g50980	2	{'salt_resistance', 'drought_resistance'}	3:29126787-29134966	Oryza sativa Japonica Group	unknown
LOC_Os03g51110	2	{'salt_resistance', 'drought_resistance'}	3:29236174-29238382	Oryza sativa Japonica Group	unknown
LOC_Os03g51330	2	{'salt_resistance', 'drought_resistance'}	3:29370719-29373265	Oryza sativa Japonica Group	unknown
LOC_Os03g51970	3	{'disease_resistance', 'grain_weight_increase', 'plant_height_reduce'}	3:29823449-29825818	Oryza sativa Japonica Group	unknown
LOC_Os03g52860	2	{'disease_resistance', 'insect_resistance'}	3:30315455-30318972	Oryza sativa Japonica Group	unknown
LOC_Os03g54160	2	{'disease_resistance', 'plant_height_reduce'}	3:31031146-31041569	Oryza sativa Japonica Group	unknown
LOC_Os03g54170	2	{'disease_resistance', 'plant_height_reduce'}	3:31048351-31055019	Oryza sativa Japonica Group	unknown
LOC_Os03g55100	2	{'disease_resistance', 'salt_resistance'}	3:31344934-31350836	Oryza sativa Japonica Group	unknown
LOC_Os03g56160	2	{'salt_resistance', 'plant_height_reduce'}	3:32008400-32010658	Oryza sativa Japonica Group	unknown
LOC_Os03g56180	2	{'salt_resistance', 'plant_height_reduce'}	3:32013216-32015250	Oryza sativa Japonica Group	unknown
LOC_Os03g56790	2	{'disease_resistance', 'insect_resistance'}	3:32360572-32363839	Oryza sativa Japonica Group	unknown
LOC_Os03g56840	2	{'disease_resistance', 'salt_resistance'}	3:32384812-32388231	Oryza sativa Japonica Group	unknown
LOC_Os03g57450	2	{'disease_resistance', 'salt_resistance'}	3:32751649-32755670	Oryza sativa Japonica Group	unknown
LOC_Os03g57510	2	{'disease_resistance', 'salt_resistance'}	3:32791645-32794990	Oryza sativa Japonica Group	unknown
LOC_Os03g59340	3	{'disease_resistance', 'salt_resistance', 'drought_resistance'}	3:33780013-33786467	Oryza sativa Japonica Group	unknown
LOC_Os03g59390	2	{'disease_resistance', 'salt_resistance'}	3:33805800-33810099	Oryza sativa Japonica Group	unknown
LOC_Os03g60580	2	{'disease_resistance', 'insect_resistance'}	3:34430584-34431200	Oryza sativa Japonica Group	unknown
LOC_Os03g60810	3	{'disease_resistance', 'salt_resistance', 'plant_height_reduce'}	3:34544837-34548110	Oryza sativa Japonica Group	unknown
LOC_Os03g62090	3	{'disease_resistance', 'salt_resistance', 'drought_resistance'}	3:35177572-35183423	Oryza sativa Japonica Group	unknown
LOC_Os03g62270	2	{'disease_resistance', 'drought_resistance'}	3:35266202-35269749	Oryza sativa Japonica Group	unknown
LOC_Os03g62410	2	{'salt_resistance', 'drought_resistance'}	3:35350196-35354897	Oryza sativa Japonica Group	unknown
LOC_Os03g62430	2	{'disease_resistance', 'drought_resistance'}	3:35360733-35365166	Oryza sativa Japonica Group	unknown
LOC_Os03g63020	3	{'disease_resistance', 'salt_resistance', 'drought_resistance'}	3:35633546-35638718	Oryza sativa Japonica Group	unknown
LOC_Os03g64260	2	{'disease_resistance', 'drought_resistance'}	3:36301489-36302407	Oryza sativa Japonica Group	unknown
LOC_Os04g03830	2	{'disease_resistance', 'drought_resistance'}	4:1723217-1727297	Oryza sativa Japonica Group	unknown
LOC_Os04g04230	3	{'disease_resistance', 'salt_resistance', 'drought_resistance'}	4:1971152-1971673	Oryza sativa Japonica Group	unknown
LOC_Os04g10160	3	{'disease_resistance', 'salt_resistance', 'insect_resistance'}	4:5484768-5486773	Oryza sativa Japonica Group	unknown
LOC_Os04g13090	3	{'disease_resistance', 'salt_resistance', 'drought_resistance'}	4:7221326-7222440	Oryza sativa Japonica Group	unknown
LOC_Os04g13140	3	{'disease_resistance', 'salt_resistance', 'drought_resistance'}	4:7250358-7251846	Oryza sativa Japonica Group	unknown
LOC_Os04g13210	2	{'salt_resistance', 'drought_resistance'}	4:7301573-7312295	Oryza sativa Japonica Group	unknown
LOC_Os04g13220	2	{'salt_resistance', 'drought_resistance'}	4:7317232-7325788	Oryza sativa Japonica Group	unknown
LOC_Os04g18650	3	{'disease_resistance', 'salt_resistance', 'drought_resistance'}	4:10317017-10317403	Oryza sativa Japonica Group	unknown
LOC_Os04g21820	2	{'disease_resistance', 'drought_resistance'}	4:12364431-12369648	Oryza sativa Japonica Group	unknown
LOC_Os04g23910	2	{'disease_resistance', 'plant_height_reduce'}	4:13672710-13675884	Oryza sativa Japonica Group	unknown
LOC_Os04g24290	2	{'disease_resistance', 'drought_resistance'}	4:13912958-13915062	Oryza sativa Japonica Group	unknown
LOC_Os04g24600	2	{'salt_resistance', 'drought_resistance'}	4:14129614-14132611	Oryza sativa Japonica Group	unknown
LOC_Os04g29580	2	{'disease_resistance', 'drought_resistance'}	4:17584989-17589754	Oryza sativa Japonica Group	unknown
LOC_Os04g31900	2	{'salt_resistance', 'insect_resistance'}	4:19105902-19113570	Oryza sativa Japonica Group	unknown
LOC_Os04g32620	3	{'disease_resistance', 'salt_resistance', 'drought_resistance'}	4:19651659-19656024	Oryza sativa Japonica Group	unknown
LOC_Os04g33480	2	{'salt_resistance', 'drought_resistance'}	4:20250089-20255825	Oryza sativa Japonica Group	unknown
LOC_Os04g34970	2	{'salt_resistance', 'drought_resistance'}	4:21248865-21249599	Oryza sativa Japonica Group	unknown
LOC_Os04g35240	3	{'disease_resistance', 'salt_resistance', 'drought_resistance'}	4:21414496-21419956	Oryza sativa Japonica Group	unknown
LOC_Os04g36660	2	{'disease_resistance', 'drought_resistance'}	4:22149759-22155396	Oryza sativa Japonica Group	unknown
LOC_Os04g36750	2	{'disease_resistance', 'salt_resistance'}	4:22200999-22201941	Oryza sativa Japonica Group	unknown
LOC_Os04g38480	2	{'disease_resistance', 'grain_weight_increase'}	4:22867268-22872511	Oryza sativa Japonica Group	unknown
LOC_Os04g39840	2	{'disease_resistance', 'salt_resistance'}	4:23727920-23733947	Oryza sativa Japonica Group	unknown
LOC_Os04g39864	2	{'disease_resistance', 'salt_resistance'}	4:23735317-23742574	Oryza sativa Japonica Group	unknown
LOC_Os04g39880	2	{'disease_resistance', 'salt_resistance'}	4:23747525-23752767	Oryza sativa Japonica Group	unknown
LOC_Os04g39900	2	{'disease_resistance', 'salt_resistance'}	4:23762322-23768245	Oryza sativa Japonica Group	unknown
LOC_Os04g43270	2	{'salt_resistance', 'drought_resistance'}	4:25598959-25606215	Oryza sativa Japonica Group	unknown
LOC_Os04g44900	2	{'salt_resistance', 'plant_height_reduce'}	4:26572700-26575257	Oryza sativa Japonica Group	unknown
LOC_Os04g44910	3	{'disease_resistance', 'salt_resistance', 'plant_height_reduce'}	4:26576092-26578766	Oryza sativa Japonica Group	unknown
LOC_Os04g46220	3	{'disease_resistance', 'salt_resistance', 'drought_resistance'}	4:27370862-27373629	Oryza sativa Japonica Group	unknown
LOC_Os04g46240	3	{'disease_resistance', 'salt_resistance', 'drought_resistance'}	4:27398303-27399259	Oryza sativa Japonica Group	unknown
LOC_Os04g46250	3	{'disease_resistance', 'salt_resistance', 'drought_resistance'}	4:27408986-27410461	Oryza sativa Japonica Group	unknown
LOC_Os04g46910	2	{'disease_resistance', 'insect_resistance'}	4:27819151-27820134	Oryza sativa Japonica Group	unknown
LOC_Os04g48170	2	{'disease_resistance', 'grain_weight_increase'}	4:28672747-28677225	Oryza sativa Japonica Group	unknown
LOC_Os04g48290	2	{'disease_resistance', 'drought_resistance'}	4:28772448-28776387	Oryza sativa Japonica Group	unknown
LOC_Os04g48350	2	{'salt_resistance', 'drought_resistance'}	4:28820861-28821913	Oryza sativa Japonica Group	unknown
LOC_Os04g48510	3	{'disease_resistance', 'grain_weight_increase', 'plant_height_reduce'}	4:28921895-28923696	Oryza sativa Japonica Group	unknown
LOC_Os04g49150	2	{'disease_resistance', 'plant_height_reduce'}	4:29308245-29314112	Oryza sativa Japonica Group	unknown
LOC_Os04g49510	2	{'disease_resistance', 'salt_resistance'}	4:29531223-29536492	Oryza sativa Japonica Group	unknown
LOC_Os04g49900	2	{'salt_resistance', 'drought_resistance'}	4:29754938-29762118	Oryza sativa Japonica Group	unknown
LOC_Os04g51030	2	{'disease_resistance', 'drought_resistance'}	4:30209131-30213964	Oryza sativa Japonica Group	unknown
LOC_Os04g51050	2	{'disease_resistance', 'drought_resistance'}	4:30220289-30223989	Oryza sativa Japonica Group	unknown
LOC_Os04g51190	3	{'disease_resistance', 'grain_weight_increase', 'plant_height_reduce'}	4:30317693-30321649	Oryza sativa Japonica Group	unknown
LOC_Os04g51900	2	{'disease_resistance', 'salt_resistance'}	4:30791816-30797525	Oryza sativa Japonica Group	unknown
LOC_Os04g52780	2	{'disease_resistance', 'plant_height_reduce'}	4:31420725-31425092	Oryza sativa Japonica Group	unknown
LOC_Os04g52900	2	{'salt_resistance', 'drought_resistance'}	4:31502940-31514308	Oryza sativa Japonica Group	unknown
LOC_Os04g53994	2	{'disease_resistance', 'salt_resistance'}	4:32173554-32177365	Oryza sativa Japonica Group	unknown
LOC_Os04g53998	2	{'disease_resistance', 'salt_resistance'}	4:32178133-32182246	Oryza sativa Japonica Group	unknown
LOC_Os04g54002	2	{'disease_resistance', 'salt_resistance'}	4:32189405-32193189	Oryza sativa Japonica Group	unknown
LOC_Os04g54020	2	{'disease_resistance', 'salt_resistance'}	4:32197592-32202721	Oryza sativa Japonica Group	unknown
LOC_Os04g54070	2	{'disease_resistance', 'salt_resistance'}	4:32223116-32226952	Oryza sativa Japonica Group	unknown
LOC_Os04g54080	2	{'disease_resistance', 'salt_resistance'}	4:32229075-32233640	Oryza sativa Japonica Group	unknown
LOC_Os04g54110	2	{'disease_resistance', 'salt_resistance'}	4:32238374-32242528	Oryza sativa Japonica Group	unknown
LOC_Os04g54120	2	{'disease_resistance', 'salt_resistance'}	4:32244877-32248178	Oryza sativa Japonica Group	unknown
LOC_Os04g54140	2	{'disease_resistance', 'salt_resistance'}	4:32254120-32258262	Oryza sativa Japonica Group	unknown
LOC_Os04g54180	2	{'disease_resistance', 'salt_resistance'}	4:32273357-32276952	Oryza sativa Japonica Group	unknown
LOC_Os04g55410	2	{'salt_resistance', 'drought_resistance'}	4:32955710-32959944	Oryza sativa Japonica Group	unknown
LOC_Os04g56400	2	{'grain_weight_increase', 'plant_height_reduce'}	4:33624332-33631095	Oryza sativa Japonica Group	unknown
LOC_Os04g57440	3	{'disease_resistance', 'salt_resistance', 'drought_resistance'}	4:34172494-34176732	Oryza sativa Japonica Group	unknown
LOC_Os04g57490	3	{'disease_resistance', 'salt_resistance', 'drought_resistance'}	4:34205994-34207906	Oryza sativa Japonica Group	unknown
LOC_Os04g59450	3	{'disease_resistance', 'salt_resistance', 'drought_resistance'}	4:35344313-35346249	Oryza sativa Japonica Group	unknown
LOC_Os05g01810	3	{'disease_resistance', 'salt_resistance', 'drought_resistance'}	5:486053-488406	Oryza sativa Japonica Group	unknown
LOC_Os05g03430	2	{'salt_resistance', 'drought_resistance'}	5:1426929-1438467	Oryza sativa Japonica Group	unknown
LOC_Os05g03820	3	{'disease_resistance', 'salt_resistance', 'insect_resistance'}	5:1698506-1703160	Oryza sativa Japonica Group	unknown
LOC_Os05g04460	2	{'disease_resistance', 'drought_resistance'}	5:2053474-2057590	Oryza sativa Japonica Group	unknown
LOC_Os05g04550	3	{'disease_resistance', 'salt_resistance', 'drought_resistance'}	5:2113594-2117305	Oryza sativa Japonica Group	unknown
LOC_Os05g05160	3	{'disease_resistance', 'salt_resistance', 'drought_resistance'}	5:2511542-2518105	Oryza sativa Japonica Group	unknown
LOC_Os05g07880	2	{'salt_resistance', 'drought_resistance'}	5:4255763-4260333	Oryza sativa Japonica Group	unknown
LOC_Os05g08370	3	{'disease_resistance', 'salt_resistance', 'drought_resistance'}	5:4565177-4571461	Oryza sativa Japonica Group	unknown
LOC_Os05g10730	2	{'salt_resistance', 'drought_resistance'}	5:5907893-5915297	Oryza sativa Japonica Group	unknown
LOC_Os05g11130	4	{'disease_resistance', 'grain_weight_increase', 'salt_resistance', 'drought_resistance'}	5:6267906-6273074	Oryza sativa Japonica Group	unknown
LOC_Os05g11414	2	{'disease_resistance', 'plant_height_reduce'}	5:6447183-6458100	Oryza sativa Japonica Group	unknown
LOC_Os05g11790	3	{'disease_resistance', 'salt_resistance', 'drought_resistance'}	5:6701050-6702933	Oryza sativa Japonica Group	unknown
LOC_Os05g13770	2	{'salt_resistance', 'plant_height_reduce'}	5:7630178-7633948	Oryza sativa Japonica Group	unknown
LOC_Os05g14194	2	{'disease_resistance', 'salt_resistance'}	5:7960037-7966794	Oryza sativa Japonica Group	unknown
LOC_Os05g23880	2	{'disease_resistance', 'insect_resistance'}	5:13734067-13740568	Oryza sativa Japonica Group	unknown
LOC_Os05g25390	2	{'disease_resistance', 'drought_resistance'}	5:14749756-14754270	Oryza sativa Japonica Group	unknown
LOC_Os05g26820	3	{'disease_resistance', 'salt_resistance', 'drought_resistance'}	5:15556059-15560409	Oryza sativa Japonica Group	unknown
LOC_Os05g28350	2	{'salt_resistance', 'drought_resistance'}	5:16600597-16601813	Oryza sativa Japonica Group	unknown
LOC_Os05g29810	2	{'salt_resistance', 'drought_resistance'}	5:17246963-17248264	Oryza sativa Japonica Group	unknown
LOC_Os05g32600	3	{'disease_resistance', 'salt_resistance', 'drought_resistance'}	5:19083891-19089905	Oryza sativa Japonica Group	unknown
LOC_Os05g35410	2	{'salt_resistance', 'insect_resistance'}	5:21039411-21043354	Oryza sativa Japonica Group	unknown
LOC_Os05g35770	3	{'disease_resistance', 'salt_resistance', 'drought_resistance'}	5:21229424-21231030	Oryza sativa Japonica Group	unknown
LOC_Os05g37640	2	{'disease_resistance', 'drought_resistance'}	5:22029223-22031044	Oryza sativa Japonica Group	unknown
LOC_Os05g38290	3	{'disease_resistance', 'salt_resistance', 'drought_resistance'}	5:22450676-22452631	Oryza sativa Japonica Group	unknown
LOC_Os05g39090	2	{'disease_resistance', 'salt_resistance'}	5:22919309-22924421	Oryza sativa Japonica Group	unknown
LOC_Os05g39580	2	{'salt_resistance', 'drought_resistance'}	5:23239202-23240677	Oryza sativa Japonica Group	unknown
LOC_Os05g39870	3	{'disease_resistance', 'salt_resistance', 'drought_resistance'}	5:23429486-23434020	Oryza sativa Japonica Group	unknown
LOC_Os05g41070	2	{'salt_resistance', 'drought_resistance'}	5:24062649-24066043	Oryza sativa Japonica Group	unknown
LOC_Os05g41270	2	{'disease_resistance', 'salt_resistance'}	5:24175473-24178191	Oryza sativa Japonica Group	unknown
LOC_Os05g42210	2	{'disease_resistance', 'salt_resistance'}	5:24676774-24682628	Oryza sativa Japonica Group	unknown
LOC_Os05g43230	3	{'disease_resistance', 'salt_resistance', 'drought_resistance'}	5:25153902-25157655	Oryza sativa Japonica Group	unknown
LOC_Os05g43840	3	{'disease_resistance', 'salt_resistance', 'drought_resistance'}	5:25489315-25491603	Oryza sativa Japonica Group	unknown
LOC_Os05g45420	3	{'disease_resistance', 'salt_resistance', 'drought_resistance'}	5:26346997-26351611	Oryza sativa Japonica Group	unknown
LOC_Os05g46230	2	{'disease_resistance', 'salt_resistance'}	5:26808002-26812530	Oryza sativa Japonica Group	unknown
LOC_Os05g47770	2	{'disease_resistance', 'drought_resistance'}	5:27360906-27367545	Oryza sativa Japonica Group	unknown
LOC_Os05g49010	2	{'disease_resistance', 'drought_resistance'}	5:28109440-28110312	Oryza sativa Japonica Group	unknown
LOC_Os05g49140	3	{'disease_resistance', 'salt_resistance', 'drought_resistance'}	5:28188762-28194025	Oryza sativa Japonica Group	unknown
LOC_Os05g49210	3	{'disease_resistance', 'salt_resistance', 'drought_resistance'}	5:28238562-28241041	Oryza sativa Japonica Group	unknown
LOC_Os05g49730	3	{'disease_resistance', 'salt_resistance', 'drought_resistance'}	5:28523662-28526025	Oryza sativa Japonica Group	unknown
LOC_Os05g49930	3	{'grain_weight_increase', 'salt_resistance', 'plant_height_reduce'}	5:28640262-28642010	Oryza sativa Japonica Group	unknown
LOC_Os05g50120	3	{'disease_resistance', 'salt_resistance', 'drought_resistance'}	5:28721012-28726522	Oryza sativa Japonica Group	unknown
LOC_Os05g50770	2	{'salt_resistance', 'drought_resistance'}	5:29119644-29121884	Oryza sativa Japonica Group	unknown
LOC_Os05g50810	2	{'disease_resistance', 'salt_resistance'}	5:29140430-29144552	Oryza sativa Japonica Group	unknown
LOC_Os05g50890	2	{'disease_resistance', 'insect_resistance'}	5:29200198-29205717	Oryza sativa Japonica Group	unknown
LOC_Os06g02144	3	{'disease_resistance', 'salt_resistance', 'drought_resistance'}	6:643683-646768	Oryza sativa Japonica Group	unknown
LOC_Os06g02180	3	{'disease_resistance', 'salt_resistance', 'drought_resistance'}	6:660148-665406	Oryza sativa Japonica Group	unknown
LOC_Os06g02560	3	{'disease_resistance', 'grain_weight_increase', 'plant_height_reduce'}	6:893102-896376	Oryza sativa Japonica Group	unknown
LOC_Os06g02570	2	{'disease_resistance', 'salt_resistance'}	6:902497-907096	Oryza sativa Japonica Group	unknown
LOC_Os06g03970	3	{'disease_resistance', 'grain_weight_increase', 'plant_height_reduce'}	6:1605460-1612409	Oryza sativa Japonica Group	unknown
LOC_Os06g05380	3	{'disease_resistance', 'salt_resistance', 'drought_resistance'}	6:2429149-2433254	Oryza sativa Japonica Group	unknown
LOC_Os06g05520	3	{'disease_resistance', 'salt_resistance', 'drought_resistance'}	6:2498847-2502901	Oryza sativa Japonica Group	unknown
LOC_Os06g05660	2	{'disease_resistance', 'salt_resistance'}	6:2558015-2562242	Oryza sativa Japonica Group	unknown
LOC_Os06g06090	3	{'disease_resistance', 'salt_resistance', 'drought_resistance'}	6:2806543-2813004	Oryza sativa Japonica Group	unknown
LOC_Os06g06440	2	{'salt_resistance', 'drought_resistance'}	6:3001105-3009250	Oryza sativa Japonica Group	unknown
LOC_Os06g06750	2	{'disease_resistance', 'plant_height_reduce'}	6:3162801-3169415	Oryza sativa Japonica Group	unknown
LOC_Os06g08280	2	{'disease_resistance', 'drought_resistance'}	6:4008139-4013539	Oryza sativa Japonica Group	unknown
LOC_Os06g09180	3	{'disease_resistance', 'salt_resistance', 'drought_resistance'}	6:4616608-4618211	Oryza sativa Japonica Group	unknown
LOC_Os06g09390	2	{'salt_resistance', 'drought_resistance'}	6:4731330-4733911	Oryza sativa Japonica Group	unknown
LOC_Os06g10310	3	{'disease_resistance', 'grain_weight_increase', 'plant_height_reduce'}	6:5300136-5301473	Oryza sativa Japonica Group	unknown
LOC_Os06g10790	2	{'salt_resistance', 'plant_height_reduce'}	6:5633354-5635721	Oryza sativa Japonica Group	unknown
LOC_Os06g11200	2	{'salt_resistance', 'drought_resistance'}	6:5878572-5880549	Oryza sativa Japonica Group	unknown
LOC_Os06g11210	2	{'salt_resistance', 'drought_resistance'}			unknown
LOC_Os06g11240	2	{'salt_resistance', 'drought_resistance'}			unknown
LOC_Os06g11260	2	{'salt_resistance', 'drought_resistance'}	6:5905264-5906018	Oryza sativa Japonica Group	unknown
LOC_Os06g11270	2	{'salt_resistance', 'drought_resistance'}	6:5908095-5909468	Oryza sativa Japonica Group	unknown
LOC_Os06g12120	2	{'disease_resistance', 'grain_weight_increase'}	6:6484043-6488553	Oryza sativa Japonica Group	unknown
LOC_Os06g14260	2	{'salt_resistance', 'plant_height_reduce'}	6:7953935-7956231	Oryza sativa Japonica Group	unknown
LOC_Os06g16330	2	{'disease_resistance', 'grain_weight_increase'}	6:9315991-9323908	Oryza sativa Japonica Group	unknown
LOC_Os06g17490	2	{'salt_resistance', 'plant_height_reduce'}	6:10146841-10149402	Oryza sativa Japonica Group	unknown
LOC_Os06g21570	2	{'disease_resistance', 'salt_resistance'}	6:12437997-12442742	Oryza sativa Japonica Group	unknown
LOC_Os06g22980	3	{'disease_resistance', 'salt_resistance', 'drought_resistance'}	6:13414641-13418309	Oryza sativa Japonica Group	unknown
LOC_Os06g26340	3	{'disease_resistance', 'salt_resistance', 'drought_resistance'}	6:15414829-15423582	Oryza sativa Japonica Group	unknown
LOC_Os06g27890	3	{'disease_resistance', 'salt_resistance', 'drought_resistance'}	6:15811008-15821884	Oryza sativa Japonica Group	unknown
LOC_Os06g33480	2	{'salt_resistance', 'drought_resistance'}	6:19503407-19506416	Oryza sativa Japonica Group	unknown
LOC_Os06g33640	2	{'salt_resistance', 'drought_resistance'}	6:19581998-19585408	Oryza sativa Japonica Group	unknown
LOC_Os06g33690	2	{'salt_resistance', 'drought_resistance'}	6:19604055-19606116	Oryza sativa Japonica Group	unknown
LOC_Os06g36330	2	{'disease_resistance', 'drought_resistance'}	6:21315872-21317578	Oryza sativa Japonica Group	unknown
LOC_Os06g36650	2	{'salt_resistance', 'drought_resistance'}	6:21538698-21544235	Oryza sativa Japonica Group	unknown
LOC_Os06g38450	3	{'disease_resistance', 'salt_resistance', 'drought_resistance'}	6:22779409-22781109	Oryza sativa Japonica Group	unknown
LOC_Os06g39906	2	{'disease_resistance', 'drought_resistance'}	6:23732555-23734536	Oryza sativa Japonica Group	unknown
LOC_Os06g39970	3	{'disease_resistance', 'salt_resistance', 'drought_resistance'}	6:23777679-23780888	Oryza sativa Japonica Group	unknown
LOC_Os06g40170	2	{'salt_resistance', 'drought_resistance'}	6:23908918-23913797	Oryza sativa Japonica Group	unknown
LOC_Os06g40180	2	{'salt_resistance', 'drought_resistance'}	6:23921940-23924921	Oryza sativa Japonica Group	unknown
LOC_Os06g40190	2	{'salt_resistance', 'drought_resistance'}	6:23928702-23932372	Oryza sativa Japonica Group	unknown
LOC_Os06g40370	3	{'disease_resistance', 'salt_resistance', 'drought_resistance'}	6:24038926-24044791	Oryza sativa Japonica Group	unknown
LOC_Os06g40920	2	{'disease_resistance', 'salt_resistance'}	6:24390137-24394626	Oryza sativa Japonica Group	unknown
LOC_Os06g44410	2	{'salt_resistance', 'drought_resistance'}	6:26807861-26813600	Oryza sativa Japonica Group	unknown
LOC_Os06g48590	3	{'disease_resistance', 'salt_resistance', 'drought_resistance'}	6:29398207-29402631	Oryza sativa Japonica Group	unknown
LOC_Os06g49430	3	{'disease_resistance', 'salt_resistance', 'drought_resistance'}	6:29949829-29954874	Oryza sativa Japonica Group	unknown
LOC_Os06g50300	2	{'disease_resistance', 'salt_resistance'}	6:30444411-30450497	Oryza sativa Japonica Group	unknown
LOC_Os06g50724	2	{'disease_resistance', 'drought_resistance'}	6:30688275-30691819	Oryza sativa Japonica Group	unknown
LOC_Os06g51290	2	{'disease_resistance', 'salt_resistance'}	6:31051971-31055926	Oryza sativa Japonica Group	unknown
LOC_Os07g01020	2	{'salt_resistance', 'drought_resistance'}	7:11572-12986	Oryza sativa Japonica Group	unknown
LOC_Os07g01820	2	{'disease_resistance', 'plant_height_reduce'}	7:471174-477655	Oryza sativa Japonica Group	unknown
LOC_Os07g03780	3	{'disease_resistance', 'salt_resistance', 'plant_height_reduce'}	7:1575322-1578615	Oryza sativa Japonica Group	unknown
LOC_Os07g03790	2	{'salt_resistance', 'plant_height_reduce'}	7:1583453-1585631	Oryza sativa Japonica Group	unknown
LOC_Os07g03810	3	{'disease_resistance', 'salt_resistance', 'plant_height_reduce'}	7:1590435-1593309	Oryza sativa Japonica Group	unknown
LOC_Os07g03820	2	{'salt_resistance', 'plant_height_reduce'}	7:1595360-1597614	Oryza sativa Japonica Group	unknown
LOC_Os07g03830	2	{'salt_resistance', 'plant_height_reduce'}	7:1599870-1601885	Oryza sativa Japonica Group	unknown
LOC_Os07g03840	3	{'disease_resistance', 'salt_resistance', 'plant_height_reduce'}	7:1603024-1605378	Oryza sativa Japonica Group	unknown
LOC_Os07g03870	3	{'disease_resistance', 'salt_resistance', 'plant_height_reduce'}	7:1612858-1616245	Oryza sativa Japonica Group	unknown
LOC_Os07g03880	2	{'salt_resistance', 'plant_height_reduce'}	7:1618513-1620591	Oryza sativa Japonica Group	unknown
LOC_Os07g03890	2	{'salt_resistance', 'plant_height_reduce'}	7:1622765-1628739	Oryza sativa Japonica Group	unknown
LOC_Os07g03900	3	{'disease_resistance', 'salt_resistance', 'plant_height_reduce'}	7:1631223-1633253	Oryza sativa Japonica Group	unknown
LOC_Os07g03930	2	{'salt_resistance', 'plant_height_reduce'}	7:1647013-1648956	Oryza sativa Japonica Group	unknown
LOC_Os07g03950	2	{'salt_resistance', 'plant_height_reduce'}	7:1666092-1668002	Oryza sativa Japonica Group	unknown
LOC_Os07g03970	2	{'salt_resistance', 'plant_height_reduce'}	7:1671450-1673471	Oryza sativa Japonica Group	unknown
LOC_Os07g04000	2	{'salt_resistance', 'plant_height_reduce'}	7:1687295-1689945	Oryza sativa Japonica Group	unknown
LOC_Os07g04010	2	{'salt_resistance', 'plant_height_reduce'}	7:1692909-1694918	Oryza sativa Japonica Group	unknown
LOC_Os07g04040	2	{'salt_resistance', 'plant_height_reduce'}	7:1712201-1714497	Oryza sativa Japonica Group	unknown
LOC_Os07g04130	2	{'salt_resistance', 'plant_height_reduce'}	7:1753789-1756077	Oryza sativa Japonica Group	unknown
LOC_Os07g04190	2	{'disease_resistance', 'insect_resistance'}	7:1812193-1816108	Oryza sativa Japonica Group	unknown
LOC_Os07g05620	3	{'disease_resistance', 'salt_resistance', 'drought_resistance'}	7:2643540-2647873	Oryza sativa Japonica Group	unknown
LOC_Os07g05740	3	{'disease_resistance', 'plant_height_reduce', 'insect_resistance'}	7:2757219-2761925	Oryza sativa Japonica Group	unknown
LOC_Os07g05940	3	{'disease_resistance', 'salt_resistance', 'drought_resistance'}	7:2870686-2872832	Oryza sativa Japonica Group	unknown
LOC_Os07g06740	2	{'disease_resistance', 'salt_resistance'}	7:3288477-3293291	Oryza sativa Japonica Group	unknown
LOC_Os07g07910	2	{'salt_resistance', 'insect_resistance'}	7:3970390-3975825	Oryza sativa Japonica Group	unknown
LOC_Os07g09610	2	{'salt_resistance', 'drought_resistance'}	7:5102509-5107298	Oryza sativa Japonica Group	unknown
LOC_Os07g10770	3	{'disease_resistance', 'salt_resistance', 'drought_resistance'}	7:5852711-5858718	Oryza sativa Japonica Group	unknown
LOC_Os07g12340	4	{'disease_resistance', 'grain_weight_increase', 'salt_resistance', 'drought_resistance'}	7:6967999-6969311	Oryza sativa Japonica Group	unknown
LOC_Os07g14850	3	{'disease_resistance', 'salt_resistance', 'drought_resistance'}	7:8496189-8501906	Oryza sativa Japonica Group	unknown
LOC_Os07g15680	2	{'salt_resistance', 'drought_resistance'}	7:9105495-9112919	Oryza sativa Japonica Group	unknown
LOC_Os07g18230	3	{'disease_resistance', 'salt_resistance', 'plant_height_reduce'}	7:10805142-10807392	Oryza sativa Japonica Group	unknown
LOC_Os07g18240	2	{'salt_resistance', 'plant_height_reduce'}	7:10810102-10813191	Oryza sativa Japonica Group	unknown
LOC_Os07g20170	2	{'disease_resistance', 'insect_resistance'}	7:11644575-11645827	Oryza sativa Japonica Group	unknown
LOC_Os07g22710	2	{'disease_resistance', 'salt_resistance'}	7:12794960-12803568	Oryza sativa Japonica Group	unknown
LOC_Os07g24190	3	{'disease_resistance', 'salt_resistance', 'drought_resistance'}	7:13741284-13747256	Oryza sativa Japonica Group	unknown
LOC_Os07g27790	3	{'disease_resistance', 'salt_resistance', 'insect_resistance'}	7:16213454-16218080	Oryza sativa Japonica Group	unknown
LOC_Os07g28430	3	{'disease_resistance', 'grain_weight_increase', 'plant_height_reduce'}	7:16622547-16625292	Oryza sativa Japonica Group	unknown
LOC_Os07g29760	2	{'salt_resistance', 'drought_resistance'}	7:17496502-17498225	Oryza sativa Japonica Group	unknown
LOC_Os07g30774	2	{'salt_resistance', 'insect_resistance'}	7:18205276-18218190	Oryza sativa Japonica Group	unknown
LOC_Os07g33110	2	{'disease_resistance', 'salt_resistance'}	7:19769005-19774504	Oryza sativa Japonica Group	unknown
LOC_Os07g36544	2	{'disease_resistance', 'salt_resistance'}	7:21846326-21851297	Oryza sativa Japonica Group	unknown
LOC_Os07g36570	2	{'disease_resistance', 'salt_resistance'}	7:21863107-21868527	Oryza sativa Japonica Group	unknown
LOC_Os07g36590	2	{'disease_resistance', 'salt_resistance'}	7:21876890-21883372	Oryza sativa Japonica Group	unknown
LOC_Os07g36610	3	{'disease_resistance', 'salt_resistance', 'drought_resistance'}	7:21901505-21908493	Oryza sativa Japonica Group	unknown
LOC_Os07g36630	3	{'disease_resistance', 'salt_resistance', 'drought_resistance'}	7:21910216-21915284	Oryza sativa Japonica Group	unknown
LOC_Os07g36690	3	{'disease_resistance', 'salt_resistance', 'drought_resistance'}	7:21970341-21973436	Oryza sativa Japonica Group	unknown
LOC_Os07g36700	3	{'disease_resistance', 'salt_resistance', 'drought_resistance'}	7:21989083-21991756	Oryza sativa Japonica Group	unknown
LOC_Os07g36740	3	{'disease_resistance', 'salt_resistance', 'drought_resistance'}	7:22006062-22012113	Oryza sativa Japonica Group	unknown
LOC_Os07g36750	3	{'disease_resistance', 'salt_resistance', 'drought_resistance'}	7:22015724-22019184	Oryza sativa Japonica Group	unknown
LOC_Os07g36780	2	{'disease_resistance', 'salt_resistance'}	7:22036908-22039724	Oryza sativa Japonica Group	unknown
LOC_Os07g37920	4	{'disease_resistance', 'grain_weight_increase', 'salt_resistance', 'drought_resistance'}	7:22755048-22757691	Oryza sativa Japonica Group	unknown
LOC_Os07g38120	2	{'disease_resistance', 'salt_resistance'}	7:22858595-22862582	Oryza sativa Japonica Group	unknown
LOC_Os07g38800	3	{'disease_resistance', 'salt_resistance', 'plant_height_reduce'}	7:23278461-23281103	Oryza sativa Japonica Group	unknown
LOC_Os07g38810	2	{'salt_resistance', 'plant_height_reduce'}	7:23282551-23284973	Oryza sativa Japonica Group	unknown
LOC_Os07g38820	2	{'salt_resistance', 'plant_height_reduce'}	7:23289278-23291789	Oryza sativa Japonica Group	unknown
LOC_Os07g41370	2	{'disease_resistance', 'plant_height_reduce'}	7:24788476-24793884	Oryza sativa Japonica Group	unknown
LOC_Os07g42510	3	{'disease_resistance', 'salt_resistance', 'drought_resistance'}	7:25440818-25442695	Oryza sativa Japonica Group	unknown
LOC_Os07g42924	2	{'disease_resistance', 'salt_resistance'}	7:25696800-25704080	Oryza sativa Japonica Group	unknown
LOC_Os07g42940	3	{'disease_resistance', 'salt_resistance', 'drought_resistance'}	7:25717760-25722215	Oryza sativa Japonica Group	unknown
LOC_Os07g43030	2	{'salt_resistance', 'insect_resistance'}	7:25776198-25783374	Oryza sativa Japonica Group	unknown
LOC_Os07g48100	3	{'disease_resistance', 'salt_resistance', 'drought_resistance'}	7:28726787-28729605	Oryza sativa Japonica Group	unknown
LOC_Os07g48260	3	{'disease_resistance', 'salt_resistance', 'drought_resistance'}	7:28828793-28832398	Oryza sativa Japonica Group	unknown
LOC_Os07g48630	2	{'disease_resistance', 'salt_resistance'}	7:29115869-29118681	Oryza sativa Japonica Group	unknown
LOC_Os07g48760	3	{'disease_resistance', 'salt_resistance', 'drought_resistance'}	7:29190282-29194556	Oryza sativa Japonica Group	unknown
LOC_Os08g06060	3	{'disease_resistance', 'salt_resistance', 'drought_resistance'}	8:3307520-3310590	Oryza sativa Japonica Group	unknown
LOC_Os08g06380	3	{'disease_resistance', 'salt_resistance', 'drought_resistance'}	8:3544163-3550661	Oryza sativa Japonica Group	unknown
LOC_Os08g07890	2	{'disease_resistance', 'grain_weight_increase'}	8:4440181-4448191	Oryza sativa Japonica Group	unknown
LOC_Os08g09940	2	{'disease_resistance', 'salt_resistance'}	8:5746737-5752486	Oryza sativa Japonica Group	unknown
LOC_Os08g13930	2	{'disease_resistance', 'salt_resistance'}	8:8342181-8346667	Oryza sativa Japonica Group	unknown
LOC_Os08g25570	2	{'salt_resistance', 'drought_resistance'}	8:15554139-15559152	Oryza sativa Japonica Group	unknown
LOC_Os08g25710	3	{'disease_resistance', 'salt_resistance', 'drought_resistance'}	8:15642075-15645940	Oryza sativa Japonica Group	unknown
LOC_Os08g31060	2	{'salt_resistance', 'drought_resistance'}	8:19173524-19180863	Oryza sativa Japonica Group	unknown
LOC_Os08g33488	2	{'disease_resistance', 'plant_height_reduce'}	8:20897215-20906881	Oryza sativa Japonica Group	unknown
LOC_Os08g34150	2	{'salt_resistance', 'drought_resistance'}	8:21407407-21408779	Oryza sativa Japonica Group	unknown
LOC_Os08g34240	3	{'disease_resistance', 'salt_resistance', 'drought_resistance'}	8:21466751-21468619	Oryza sativa Japonica Group	unknown
LOC_Os08g34380	2	{'disease_resistance', 'grain_weight_increase'}	8:21578024-21583634	Oryza sativa Japonica Group	unknown
LOC_Os08g35220	3	{'disease_resistance', 'salt_resistance', 'drought_resistance'}	8:22219445-22227487	Oryza sativa Japonica Group	unknown
LOC_Os08g36790	2	{'salt_resistance', 'drought_resistance'}	8:23234397-23240846	Oryza sativa Japonica Group	unknown
LOC_Os08g36860	2	{'salt_resistance', 'drought_resistance'}	8:23288613-23294164	Oryza sativa Japonica Group	unknown
LOC_Os08g36920	2	{'salt_resistance', 'drought_resistance'}	8:23353882-23355003	Oryza sativa Japonica Group	unknown
LOC_Os08g37800	3	{'disease_resistance', 'salt_resistance', 'drought_resistance'}	8:23942237-23947411	Oryza sativa Japonica Group	unknown
LOC_Os08g38086	2	{'disease_resistance', 'salt_resistance'}	8:24124835-24129488	Oryza sativa Japonica Group	unknown
LOC_Os08g38560	2	{'disease_resistance', 'plant_height_reduce'}	8:24379092-24382986	Oryza sativa Japonica Group	unknown
LOC_Os08g39140	2	{'disease_resistance', 'salt_resistance'}	8:24719086-24723553	Oryza sativa Japonica Group	unknown
LOC_Os08g39220	2	{'disease_resistance', 'drought_resistance'}	8:24772961-24775745	Oryza sativa Japonica Group	unknown
LOC_Os08g39850	2	{'disease_resistance', 'insect_resistance'}	8:25240906-25250279	Oryza sativa Japonica Group	unknown
LOC_Os08g39860	2	{'disease_resistance', 'salt_resistance'}	8:25250314-25254656	Oryza sativa Japonica Group	unknown
LOC_Os08g39870	2	{'disease_resistance', 'salt_resistance'}	8:25260124-25266935	Oryza sativa Japonica Group	unknown
LOC_Os08g40170	2	{'disease_resistance', 'salt_resistance'}	8:25419884-25421827	Oryza sativa Japonica Group	unknown
LOC_Os08g42750	2	{'disease_resistance', 'salt_resistance'}	8:27054201-27059375	Oryza sativa Japonica Group	unknown
LOC_Os08g43210	2	{'salt_resistance', 'drought_resistance'}	8:27324298-27325279	Oryza sativa Japonica Group	unknown
LOC_Os08g43250	2	{'disease_resistance', 'drought_resistance'}	8:27345294-27347063	Oryza sativa Japonica Group	unknown
LOC_Os08g44270	3	{'disease_resistance', 'salt_resistance', 'drought_resistance'}	8:27875142-27876599	Oryza sativa Japonica Group	unknown
LOC_Os08g45110	2	{'salt_resistance', 'drought_resistance'}	8:28321216-28322394	Oryza sativa Japonica Group	unknown
LOC_Os09g09500	2	{'salt_resistance', 'plant_height_reduce'}	9:5120567-5122573	Oryza sativa Japonica Group	unknown
LOC_Os09g09510	2	{'salt_resistance', 'plant_height_reduce'}	9:5125150-5127327	Oryza sativa Japonica Group	unknown
LOC_Os09g12240	2	{'disease_resistance', 'grain_weight_increase'}	9:6954941-6959667	Oryza sativa Japonica Group	unknown
LOC_Os09g13890	2	{'disease_resistance', 'drought_resistance'}	9:8173211-8177505	Oryza sativa Japonica Group	unknown
LOC_Os09g15670	3	{'disease_resistance', 'salt_resistance', 'drought_resistance'}	9:9567471-9568905	Oryza sativa Japonica Group	unknown
LOC_Os09g21370	3	{'disease_resistance', 'salt_resistance', 'drought_resistance'}	9:12897272-12899550	Oryza sativa Japonica Group	unknown
LOC_Os09g25060	3	{'disease_resistance', 'salt_resistance', 'drought_resistance'}	9:14975932-14977713	Oryza sativa Japonica Group	unknown
LOC_Os09g25070	3	{'disease_resistance', 'salt_resistance', 'drought_resistance'}	9:14992803-14994888	Oryza sativa Japonica Group	unknown
LOC_Os09g25090	3	{'disease_resistance', 'salt_resistance', 'drought_resistance'}	9:15009090-15010837	Oryza sativa Japonica Group	unknown
LOC_Os09g25110	3	{'disease_resistance', 'salt_resistance', 'drought_resistance'}	9:15031073-15034300	Oryza sativa Japonica Group	unknown
LOC_Os09g25390	2	{'salt_resistance', 'drought_resistance'}	9:15222652-15226444	Oryza sativa Japonica Group	unknown
LOC_Os09g25490	3	{'disease_resistance', 'salt_resistance', 'drought_resistance'}	9:15281268-15285910	Oryza sativa Japonica Group	unknown
LOC_Os09g26420	2	{'salt_resistance', 'drought_resistance'}	9:15959324-15962975	Oryza sativa Japonica Group	unknown
LOC_Os09g27030	2	{'salt_resistance', 'drought_resistance'}	9:16439141-16443631	Oryza sativa Japonica Group	unknown
LOC_Os09g28310	2	{'salt_resistance', 'drought_resistance'}	9:17189976-17194013	Oryza sativa Japonica Group	unknown
LOC_Os09g28390	2	{'salt_resistance', 'drought_resistance'}	9:17252028-17255514	Oryza sativa Japonica Group	unknown
LOC_Os09g28440	2	{'salt_resistance', 'drought_resistance'}	9:17306100-17307199	Oryza sativa Japonica Group	unknown
LOC_Os09g29584	2	{'disease_resistance', 'drought_resistance'}	9:17987174-17996613	Oryza sativa Japonica Group	unknown
LOC_Os09g29840	2	{'disease_resistance', 'salt_resistance'}	9:18150618-18155512	Oryza sativa Japonica Group	unknown
LOC_Os09g30412	2	{'disease_resistance', 'salt_resistance'}	9:18514572-18518316	Oryza sativa Japonica Group	unknown
LOC_Os09g30454	2	{'disease_resistance', 'drought_resistance'}	9:18550671-18553901	Oryza sativa Japonica Group	unknown
LOC_Os09g31410	2	{'disease_resistance', 'salt_resistance'}	9:18889721-18893801	Oryza sativa Japonica Group	unknown
LOC_Os09g32230	3	{'disease_resistance', 'salt_resistance', 'drought_resistance'}	9:19239243-19240737	Oryza sativa Japonica Group	unknown
LOC_Os09g32948	2	{'disease_resistance', 'plant_height_reduce'}	9:19653389-19659766	Oryza sativa Japonica Group	unknown
LOC_Os09g33910	2	{'disease_resistance', 'salt_resistance'}	9:20015571-20019391	Oryza sativa Japonica Group	unknown
LOC_Os09g35020	2	{'salt_resistance', 'drought_resistance'}	9:20399334-20400263	Oryza sativa Japonica Group	unknown
LOC_Os09g35600	2	{'disease_resistance', 'drought_resistance'}	9:20469822-20471447	Oryza sativa Japonica Group	unknown
LOC_Os09g37100	2	{'salt_resistance', 'drought_resistance'}	9:21391774-21397949	Oryza sativa Japonica Group	unknown
LOC_Os09g37780	2	{'disease_resistance', 'salt_resistance'}	9:21761758-21765360	Oryza sativa Japonica Group	unknown
LOC_Os09g37800	2	{'disease_resistance', 'salt_resistance'}	9:21779210-21782486	Oryza sativa Japonica Group	unknown
LOC_Os09g37840	2	{'disease_resistance', 'salt_resistance'}	9:21802582-21820409	Oryza sativa Japonica Group	unknown
LOC_Os09g37880	2	{'disease_resistance', 'salt_resistance'}	9:21841356-21845242	Oryza sativa Japonica Group	unknown
LOC_Os09g37890	2	{'disease_resistance', 'salt_resistance'}	9:21846582-21850018	Oryza sativa Japonica Group	unknown
LOC_Os09g38320	2	{'disease_resistance', 'salt_resistance'}	9:22041967-22045393	Oryza sativa Japonica Group	unknown
LOC_Os09g38834	2	{'disease_resistance', 'drought_resistance'}	9:22307502-22310180	Oryza sativa Japonica Group	unknown
LOC_Os09g38840	2	{'disease_resistance', 'drought_resistance'}	9:22311597-22314649	Oryza sativa Japonica Group	unknown
LOC_Os09g38850	2	{'disease_resistance', 'drought_resistance'}	9:22315726-22318865	Oryza sativa Japonica Group	unknown
LOC_Os09g38910	2	{'disease_resistance', 'drought_resistance'}	9:22348739-22351495	Oryza sativa Japonica Group	unknown
LOC_Os09g39090	3	{'disease_resistance', 'salt_resistance', 'drought_resistance'}	9:22438059-22439425	Oryza sativa Japonica Group	unknown
LOC_Os09g39120	3	{'disease_resistance', 'salt_resistance', 'drought_resistance'}	9:22455458-22457593	Oryza sativa Japonica Group	unknown
LOC_Os09g39320	2	{'disease_resistance', 'drought_resistance'}	9:22598974-22608382	Oryza sativa Japonica Group	unknown
LOC_Os09g39810	3	{'disease_resistance', 'salt_resistance', 'drought_resistance'}	9:22821581-22821976	Oryza sativa Japonica Group	unknown
LOC_Os10g01080	2	{'salt_resistance', 'drought_resistance'}			unknown
LOC_Os10g07229	2	{'disease_resistance', 'salt_resistance'}	10:3793863-3804018	Oryza sativa Japonica Group	unknown
LOC_Os10g08980	3	{'disease_resistance', 'salt_resistance', 'drought_resistance'}	10:4857120-4859975	Oryza sativa Japonica Group	unknown
LOC_Os10g10030	2	{'disease_resistance', 'drought_resistance'}	10:5442144-5449074	Oryza sativa Japonica Group	unknown
LOC_Os10g10130	2	{'disease_resistance', 'drought_resistance'}	10:5538022-5544580	Oryza sativa Japonica Group	unknown
LOC_Os10g17650	2	{'disease_resistance', 'salt_resistance'}	10:8920261-8926172	Oryza sativa Japonica Group	unknown
LOC_Os10g20260	3	{'disease_resistance', 'salt_resistance', 'drought_resistance'}	10:10180422-10187639	Oryza sativa Japonica Group	unknown
LOC_Os10g21810	2	{'salt_resistance', 'drought_resistance'}	10:11191763-11203632	Oryza sativa Japonica Group	unknown
LOC_Os10g22950	2	{'salt_resistance', 'insect_resistance'}	10:11935626-11942908	Oryza sativa Japonica Group	unknown
LOC_Os10g29540	2	{'disease_resistance', 'drought_resistance'}	10:15341885-15350995	Oryza sativa Japonica Group	unknown
LOC_Os10g30530	2	{'salt_resistance', 'plant_height_reduce'}	10:15874147-15876706	Oryza sativa Japonica Group	unknown
LOC_Os10g30540	3	{'disease_resistance', 'salt_resistance', 'plant_height_reduce'}	10:15877678-15880058	Oryza sativa Japonica Group	unknown
LOC_Os10g32980	3	{'disease_resistance', 'salt_resistance', 'drought_resistance'}	10:17261952-17266613	Oryza sativa Japonica Group	unknown
LOC_Os10g33040	2	{'plant_height_reduce', 'insect_resistance'}	10:17312261-17317922	Oryza sativa Japonica Group	unknown
LOC_Os10g33960	2	{'disease_resistance', 'drought_resistance'}	10:18085536-18092500	Oryza sativa Japonica Group	unknown
LOC_Os10g37920	2	{'disease_resistance', 'drought_resistance'}	10:20307371-20308990	Oryza sativa Japonica Group	unknown
LOC_Os10g38060	2	{'salt_resistance', 'drought_resistance'}	10:20377031-20386096	Oryza sativa Japonica Group	unknown
LOC_Os10g38950	3	{'disease_resistance', 'salt_resistance', 'drought_resistance'}	10:20756089-20760021	Oryza sativa Japonica Group	unknown
LOC_Os10g38960	2	{'salt_resistance', 'plant_height_reduce'}	10:20764158-20766182	Oryza sativa Japonica Group	unknown
LOC_Os10g39130	2	{'disease_resistance', 'plant_height_reduce'}	10:20862952-20873797	Oryza sativa Japonica Group	unknown
LOC_Os10g39420	2	{'disease_resistance', 'salt_resistance'}	10:21027454-21032225	Oryza sativa Japonica Group	unknown
LOC_Os10g41330	3	{'disease_resistance', 'salt_resistance', 'drought_resistance'}	10:22213115-22214678	Oryza sativa Japonica Group	unknown
LOC_Os10g41490	3	{'disease_resistance', 'salt_resistance', 'drought_resistance'}	10:22294733-22297700	Oryza sativa Japonica Group	unknown
LOC_Os10g41510	3	{'disease_resistance', 'salt_resistance', 'drought_resistance'}	10:22298890-22308687	Oryza sativa Japonica Group	unknown
LOC_Os10g42750	3	{'disease_resistance', 'salt_resistance', 'drought_resistance'}	10:23062454-23066292	Oryza sativa Japonica Group	unknown
LOC_Os11g09370	2	{'salt_resistance', 'drought_resistance'}	11:5027540-5029710	Oryza sativa Japonica Group	unknown
LOC_Os11g09418	2	{'salt_resistance', 'drought_resistance'}	11:5060129-5064632	Oryza sativa Japonica Group	unknown
LOC_Os11g10520	2	{'disease_resistance', 'salt_resistance'}	11:5755644-5760026	Oryza sativa Japonica Group	unknown
LOC_Os11g36719	2	{'disease_resistance', 'insect_resistance'}	11:21675027-21684774	Oryza sativa Japonica Group	unknown
LOC_Os11g40100	2	{'grain_weight_increase', 'plant_height_reduce'}	11:23913602-23917202	Oryza sativa Japonica Group	unknown
LOC_Os11g44170	2	{'disease_resistance', 'drought_resistance'}	11:26682528-26684711	Oryza sativa Japonica Group	unknown
LOC_Os11g44340	2	{'disease_resistance', 'drought_resistance'}	11:26794437-26802410	Oryza sativa Japonica Group	unknown
LOC_Os11g48080	2	{'salt_resistance', 'drought_resistance'}			unknown
LOC_Os12g17540	3	{'disease_resistance', 'salt_resistance', 'drought_resistance'}	12:10053411-10055200	Oryza sativa Japonica Group	unknown
LOC_Os12g32986	2	{'disease_resistance', 'salt_resistance'}	12:19921576-19927766	Oryza sativa Japonica Group	unknown
LOC_Os12g36660	2	{'disease_resistance', 'drought_resistance'}	12:22447777-22449274	Oryza sativa Japonica Group	unknown
LOC_Os12g37580	2	{'salt_resistance', 'drought_resistance'}	12:23071911-23077729	Oryza sativa Japonica Group	unknown
LOC_Os12g38610	2	{'salt_resistance', 'plant_height_reduce'}	12:23717036-23719631	Oryza sativa Japonica Group	unknown
LOC_Os12g39240	2	{'disease_resistance', 'insect_resistance'}	12:24154936-24156950	Oryza sativa Japonica Group	unknown
LOC_Os12g39300	2	{'disease_resistance', 'insect_resistance'}	12:24154798-24157079	Oryza sativa Japonica Group	unknown
LOC_Os12g40419	2	{'disease_resistance', 'drought_resistance'}	12:25015035-25026462	Oryza sativa Japonica Group	unknown
LOC_Os12g41090	2	{'disease_resistance', 'salt_resistance'}	12:25444742-25446274	Oryza sativa Japonica Group	unknown
LOC_Os12g44310	3	{'disease_resistance', 'salt_resistance', 'drought_resistance'}	12:27464735-27472036	Oryza sativa Japonica Group	unknown
TraesCS1A02G015500	2	{'salt_resistance', 'drought_resistance'}	1A:8291349-8292883	Triticum aestivum	unknown
TraesCS1A02G015600	2	{'salt_resistance', 'drought_resistance'}	1A:8295508-8297343	Triticum aestivum	unknown
TraesCS1A02G015700	2	{'salt_resistance', 'drought_resistance'}	1A:8311562-8313243	Triticum aestivum	unknown
TraesCS1A02G027300	3	{'disease_resistance', 'salt_resistance', 'drought_resistance'}	1A:12918575-12920144	Triticum aestivum	unknown
TraesCS1A02G044900	2	{'disease_resistance', 'plant_height_reduce'}	1A:25710162-25714282	Triticum aestivum	unknown
TraesCS1A02G045000	2	{'disease_resistance', 'plant_height_reduce'}	1A:25791245-25795227	Triticum aestivum	unknown
TraesCS1A02G048000	3	{'disease_resistance', 'salt_resistance', 'plant_height_reduce'}	1A:29796504-29798640	Triticum aestivum	unknown
TraesCS1A02G048100	3	{'disease_resistance', 'salt_resistance', 'plant_height_reduce'}	1A:29800306-29802574	Triticum aestivum	unknown
TraesCS1A02G050100	2	{'disease_resistance', 'salt_resistance'}	1A:32084707-32089178	Triticum aestivum	unknown
TraesCS1A02G072000	3	{'disease_resistance', 'salt_resistance', 'insect_resistance'}	1A:54349175-54355250	Triticum aestivum	unknown
TraesCS1A02G100400	2	{'disease_resistance', 'salt_resistance'}	1A:96470434-96473287	Triticum aestivum	unknown
TraesCS1A02G112700	2	{'salt_resistance', 'drought_resistance'}	1A:115357679-115363324	Triticum aestivum	unknown
TraesCS1A02G131600	2	{'disease_resistance', 'drought_resistance'}	1A:176449533-176462644	Triticum aestivum	unknown
TraesCS1A02G141800	3	{'disease_resistance', 'salt_resistance', 'drought_resistance'}	1A:241377201-241377560	Triticum aestivum	unknown
TraesCS1A02G149300	3	{'disease_resistance', 'salt_resistance', 'drought_resistance'}	1A:256823681-256827995	Triticum aestivum	unknown
TraesCS1A02G150800	2	{'salt_resistance', 'drought_resistance'}	1A:258857615-258862764	Triticum aestivum	unknown
TraesCS1A02G150900	2	{'salt_resistance', 'drought_resistance'}	1A:258870778-258881439	Triticum aestivum	unknown
TraesCS1A02G184400	2	{'salt_resistance', 'plant_height_reduce'}	1A:334446661-334448697	Triticum aestivum	unknown
TraesCS1A02G187400	2	{'salt_resistance', 'drought_resistance'}	1A:338581948-338588620	Triticum aestivum	unknown
TraesCS1A02G188100	2	{'disease_resistance', 'drought_resistance'}	1A:339913769-339916147	Triticum aestivum	unknown
TraesCS1A02G191700	2	{'salt_resistance', 'drought_resistance'}	1A:346681497-346682748	Triticum aestivum	unknown
TraesCS1A02G196100	3	{'disease_resistance', 'salt_resistance', 'drought_resistance'}	1A:354295106-354299626	Triticum aestivum	unknown
TraesCS1A02G199600	2	{'disease_resistance', 'plant_height_reduce'}	1A:358761380-358772026	Triticum aestivum	unknown
TraesCS1A02G199900	2	{'disease_resistance', 'plant_height_reduce'}	1A:359228777-359245633	Triticum aestivum	unknown
TraesCS1A02G205700	2	{'disease_resistance', 'drought_resistance'}	1A:368358196-368360794	Triticum aestivum	unknown
TraesCS1A02G212900	2	{'disease_resistance', 'insect_resistance'}	1A:376476402-376480121	Triticum aestivum	unknown
TraesCS1A02G215800	3	{'disease_resistance', 'salt_resistance', 'drought_resistance'}	1A:381313932-381318932	Triticum aestivum	unknown
TraesCS1A02G217700	2	{'salt_resistance', 'drought_resistance'}	1A:385660663-385662337	Triticum aestivum	unknown
TraesCS1A02G218100	2	{'salt_resistance', 'drought_resistance'}	1A:386479232-386480418	Triticum aestivum	unknown
TraesCS1A02G223400	2	{'salt_resistance', 'drought_resistance'}	1A:393612319-393613101	Triticum aestivum	unknown
TraesCS1A02G223500	3	{'disease_resistance', 'salt_resistance', 'drought_resistance'}	1A:393999150-394000265	Triticum aestivum	unknown
TraesCS1A02G262700	2	{'disease_resistance', 'plant_height_reduce'}	1A:458216684-458220843	Triticum aestivum	unknown
TraesCS1A02G272300	2	{'salt_resistance', 'drought_resistance'}	1A:465495668-465497672	Triticum aestivum	unknown
TraesCS1A02G292200	2	{'disease_resistance', 'salt_resistance'}	1A:487735997-487741826	Triticum aestivum	unknown
TraesCS1A02G297600	2	{'salt_resistance', 'drought_resistance'}	1A:492652071-492652999	Triticum aestivum	unknown
TraesCS1A02G306300	2	{'salt_resistance', 'drought_resistance'}	1A:498532631-498536872	Triticum aestivum	unknown
TraesCS1A02G310100	2	{'salt_resistance', 'drought_resistance'}	1A:500828042-500833457	Triticum aestivum	unknown
TraesCS1A02G320900	2	{'disease_resistance', 'salt_resistance'}	1A:511404376-511411090	Triticum aestivum	unknown
TraesCS1A02G325400	3	{'disease_resistance', 'salt_resistance', 'drought_resistance'}	1A:516369536-516373444	Triticum aestivum	unknown
TraesCS1A02G333800	2	{'salt_resistance', 'drought_resistance'}	1A:521629027-521630592	Triticum aestivum	unknown
TraesCS1A02G350500	2	{'salt_resistance', 'drought_resistance'}	1A:535314301-535318863	Triticum aestivum	unknown
TraesCS1A02G352200	3	{'disease_resistance', 'salt_resistance', 'drought_resistance'}	1A:536613453-536615497	Triticum aestivum	unknown
TraesCS1A02G360500	2	{'disease_resistance', 'salt_resistance'}	1A:541632666-541636078	Triticum aestivum	unknown
TraesCS1A02G365100	2	{'salt_resistance', 'drought_resistance'}	1A:544465438-544475283	Triticum aestivum	unknown
TraesCS1A02G370200	2	{'disease_resistance', 'salt_resistance'}	1A:547410788-547417410	Triticum aestivum	unknown
TraesCS1A02G373100	2	{'salt_resistance', 'drought_resistance'}	1A:549357850-549360837	Triticum aestivum	unknown
TraesCS1A02G374700	2	{'disease_resistance', 'drought_resistance'}	1A:549708527-549712807	Triticum aestivum	unknown
TraesCS1A02G399500	3	{'disease_resistance', 'salt_resistance', 'drought_resistance'}	1A:564039745-564040901	Triticum aestivum	unknown
TraesCS1A02G402400	3	{'disease_resistance', 'salt_resistance', 'drought_resistance'}	1A:566009663-566015714	Triticum aestivum	unknown
TraesCS1A02G415300	3	{'disease_resistance', 'salt_resistance', 'drought_resistance'}	1A:574351875-574357108	Triticum aestivum	unknown
TraesCS1A02G424200	2	{'disease_resistance', 'salt_resistance'}	1A:579296187-579299659	Triticum aestivum	unknown
TraesCS1A02G441200	3	{'disease_resistance', 'salt_resistance', 'drought_resistance'}	1A:589820460-589822655	Triticum aestivum	unknown
TraesCS1B02G018800	2	{'salt_resistance', 'drought_resistance'}	1B:8917761-8918856	Triticum aestivum	unknown
TraesCS1B02G019700	2	{'salt_resistance', 'drought_resistance'}	1B:9263133-9265074	Triticum aestivum	unknown
TraesCS1B02G019800	2	{'salt_resistance', 'drought_resistance'}	1B:9269667-9271283	Triticum aestivum	unknown
TraesCS1B02G050400	2	{'salt_resistance', 'drought_resistance'}	1B:30543633-30547236	Triticum aestivum	unknown
TraesCS1B02G058100	2	{'disease_resistance', 'plant_height_reduce'}	1B:40195419-40199829	Triticum aestivum	unknown
TraesCS1B02G062200	3	{'disease_resistance', 'salt_resistance', 'plant_height_reduce'}	1B:47176704-47178695	Triticum aestivum	unknown
TraesCS1B02G062300	3	{'disease_resistance', 'salt_resistance', 'plant_height_reduce'}	1B:47180510-47182513	Triticum aestivum	unknown
TraesCS1B02G066400	2	{'disease_resistance', 'salt_resistance'}	1B:50774894-50778871	Triticum aestivum	unknown
TraesCS1B02G090500	3	{'disease_resistance', 'salt_resistance', 'insect_resistance'}	1B:91551233-91558135	Triticum aestivum	unknown
TraesCS1B02G132900	2	{'salt_resistance', 'drought_resistance'}	1B:167930227-167934361	Triticum aestivum	unknown
TraesCS1B02G135200	2	{'salt_resistance', 'drought_resistance'}	1B:172006702-172013988	Triticum aestivum	unknown
TraesCS1B02G136200	3	{'disease_resistance', 'salt_resistance', 'drought_resistance'}	1B:173972083-173978186	Triticum aestivum	unknown
TraesCS1B02G150200	2	{'disease_resistance', 'salt_resistance'}	1B:229301060-229305078	Triticum aestivum	unknown
TraesCS1B02G154400	2	{'disease_resistance', 'drought_resistance'}	1B:256903421-256922270	Triticum aestivum	unknown
TraesCS1B02G157200	2	{'salt_resistance', 'plant_height_reduce'}	1B:266109518-266111798	Triticum aestivum	unknown
TraesCS1B02G157300	2	{'salt_resistance', 'plant_height_reduce'}	1B:266258039-266260033	Triticum aestivum	unknown
TraesCS1B02G158400	3	{'disease_resistance', 'salt_resistance', 'drought_resistance'}	1B:268899061-268899420	Triticum aestivum	unknown
TraesCS1B02G167200	3	{'disease_resistance', 'salt_resistance', 'drought_resistance'}	1B:296498546-296502896	Triticum aestivum	unknown
TraesCS1B02G168400	2	{'salt_resistance', 'drought_resistance'}	1B:298073340-298089510	Triticum aestivum	unknown
TraesCS1B02G168500	2	{'salt_resistance', 'drought_resistance'}	1B:298158789-298166979	Triticum aestivum	unknown
TraesCS1B02G195900	2	{'disease_resistance', 'drought_resistance'}	1B:352333774-352335843	Triticum aestivum	unknown
TraesCS1B02G210700	3	{'disease_resistance', 'salt_resistance', 'drought_resistance'}	1B:383791996-383797093	Triticum aestivum	unknown
TraesCS1B02G214500	2	{'disease_resistance', 'plant_height_reduce'}	1B:389213339-389224699	Triticum aestivum	unknown
TraesCS1B02G219200	2	{'disease_resistance', 'drought_resistance'}	1B:396590588-396593515	Triticum aestivum	unknown
TraesCS1B02G231000	2	{'salt_resistance', 'drought_resistance'}	1B:414806177-414807939	Triticum aestivum	unknown
TraesCS1B02G231500	3	{'disease_resistance', 'salt_resistance', 'drought_resistance'}	1B:415743802-415744572	Triticum aestivum	unknown
TraesCS1B02G236700	2	{'salt_resistance', 'drought_resistance'}	1B:423823534-423824304	Triticum aestivum	unknown
TraesCS1B02G236800	3	{'disease_resistance', 'salt_resistance', 'drought_resistance'}	1B:423922101-423923227	Triticum aestivum	unknown
TraesCS1B02G243200	2	{'salt_resistance', 'drought_resistance'}	1B:432116599-432117724	Triticum aestivum	unknown
TraesCS1B02G251700	2	{'disease_resistance', 'salt_resistance'}	1B:444667125-444671214	Triticum aestivum	unknown
TraesCS1B02G273300	2	{'disease_resistance', 'plant_height_reduce'}	1B:480437886-480442016	Triticum aestivum	unknown
TraesCS1B02G301600	2	{'disease_resistance', 'salt_resistance'}	1B:522055416-522061604	Triticum aestivum	unknown
TraesCS1B02G306800	2	{'salt_resistance', 'drought_resistance'}	1B:529998098-529998682	Triticum aestivum	unknown
TraesCS1B02G307000	2	{'salt_resistance', 'drought_resistance'}	1B:530045461-530048165	Triticum aestivum	unknown
TraesCS1B02G309400	3	{'disease_resistance', 'salt_resistance', 'drought_resistance'}	1B:532172311-532174949	Triticum aestivum	unknown
TraesCS1B02G317100	2	{'salt_resistance', 'drought_resistance'}	1B:542135029-542139174	Triticum aestivum	unknown
TraesCS1B02G321200	2	{'salt_resistance', 'drought_resistance'}	1B:545206608-545213791	Triticum aestivum	unknown
TraesCS1B02G333300	2	{'disease_resistance', 'salt_resistance'}	1B:559962224-559969037	Triticum aestivum	unknown
TraesCS1B02G341600	2	{'disease_resistance', 'salt_resistance'}	1B:569560866-569566532	Triticum aestivum	unknown
TraesCS1B02G347100	2	{'salt_resistance', 'drought_resistance'}	1B:576205415-576208862	Triticum aestivum	unknown
TraesCS1B02G357200	3	{'disease_resistance', 'salt_resistance', 'drought_resistance'}	1B:587035491-587047829	Triticum aestivum	unknown
TraesCS1B02G370800	3	{'disease_resistance', 'salt_resistance', 'drought_resistance'}	1B:600523164-600524936	Triticum aestivum	unknown
TraesCS1B02G377000	2	{'disease_resistance', 'salt_resistance'}	1B:608533160-608536582	Triticum aestivum	unknown
TraesCS1B02G382600	2	{'salt_resistance', 'drought_resistance'}	1B:614788759-614794654	Triticum aestivum	unknown
TraesCS1B02G389200	2	{'disease_resistance', 'salt_resistance'}	1B:622706402-622708971	Triticum aestivum	unknown
TraesCS1B02G393300	2	{'salt_resistance', 'drought_resistance'}	1B:626152672-626155805	Triticum aestivum	unknown
TraesCS1B02G394900	2	{'disease_resistance', 'drought_resistance'}	1B:626684440-626688691	Triticum aestivum	unknown
TraesCS1B02G427500	2	{'disease_resistance', 'drought_resistance'}	1B:652924921-652925848	Triticum aestivum	unknown
TraesCS1B02G427600	3	{'disease_resistance', 'salt_resistance', 'drought_resistance'}	1B:653038941-653039813	Triticum aestivum	unknown
TraesCS1B02G431400	3	{'disease_resistance', 'salt_resistance', 'drought_resistance'}	1B:655781234-655786592	Triticum aestivum	unknown
TraesCS1B02G445300	3	{'disease_resistance', 'salt_resistance', 'drought_resistance'}	1B:665397447-665402571	Triticum aestivum	unknown
TraesCS1B02G456700	2	{'disease_resistance', 'salt_resistance'}	1B:671199121-671202722	Triticum aestivum	unknown
TraesCS1B02G475700	3	{'disease_resistance', 'salt_resistance', 'drought_resistance'}	1B:684067251-684069246	Triticum aestivum	unknown
TraesCS1D02G007100	2	{'disease_resistance', 'drought_resistance'}	1D:3471316-3473598	Triticum aestivum	unknown
TraesCS1D02G008900	2	{'disease_resistance', 'drought_resistance'}	1D:4635249-4637357	Triticum aestivum	unknown
TraesCS1D02G013000	2	{'salt_resistance', 'drought_resistance'}	1D:6731413-6732961	Triticum aestivum	unknown
TraesCS1D02G013400	2	{'salt_resistance', 'drought_resistance'}	1D:6786398-6787884	Triticum aestivum	unknown
TraesCS1D02G013500	2	{'salt_resistance', 'drought_resistance'}	1D:6789468-6794893	Triticum aestivum	unknown
TraesCS1D02G013700	2	{'salt_resistance', 'drought_resistance'}	1D:6864265-6866168	Triticum aestivum	unknown
TraesCS1D02G026500	3	{'disease_resistance', 'salt_resistance', 'drought_resistance'}	1D:10740324-10741901	Triticum aestivum	unknown
TraesCS1D02G035800	2	{'salt_resistance', 'drought_resistance'}	1D:16610392-16613480	Triticum aestivum	unknown
TraesCS1D02G045500	2	{'disease_resistance', 'plant_height_reduce'}	1D:24787643-24791443	Triticum aestivum	unknown
TraesCS1D02G045600	2	{'disease_resistance', 'plant_height_reduce'}	1D:24929717-24936036	Triticum aestivum	unknown
TraesCS1D02G048900	3	{'disease_resistance', 'salt_resistance', 'plant_height_reduce'}	1D:28569318-28572143	Triticum aestivum	unknown
TraesCS1D02G049000	3	{'disease_resistance', 'salt_resistance', 'plant_height_reduce'}	1D:28574236-28576502	Triticum aestivum	unknown
TraesCS1D02G074500	3	{'disease_resistance', 'salt_resistance', 'insect_resistance'}	1D:55891772-55897875	Triticum aestivum	unknown
TraesCS1D02G092400	2	{'disease_resistance', 'salt_resistance'}	1D:78980387-78982868	Triticum aestivum	unknown
TraesCS1D02G114300	2	{'salt_resistance', 'drought_resistance'}	1D:110496070-110500148	Triticum aestivum	unknown
TraesCS1D02G116700	2	{'salt_resistance', 'drought_resistance'}	1D:112467930-112473378	Triticum aestivum	unknown
TraesCS1D02G117400	3	{'disease_resistance', 'salt_resistance', 'drought_resistance'}	1D:113870740-113877149	Triticum aestivum	unknown
TraesCS1D02G124500	2	{'disease_resistance', 'salt_resistance'}	1D:128672375-128675978	Triticum aestivum	unknown
TraesCS1D02G136400	2	{'disease_resistance', 'drought_resistance'}	1D:181626866-181639553	Triticum aestivum	unknown
TraesCS1D02G139700	2	{'salt_resistance', 'plant_height_reduce'}	1D:192569083-192571639	Triticum aestivum	unknown
TraesCS1D02G140900	3	{'disease_resistance', 'salt_resistance', 'drought_resistance'}	1D:194201765-194202124	Triticum aestivum	unknown
TraesCS1D02G146600	3	{'disease_resistance', 'salt_resistance', 'drought_resistance'}	1D:202566182-202570514	Triticum aestivum	unknown
TraesCS1D02G147900	2	{'salt_resistance', 'drought_resistance'}	1D:203914878-203921746	Triticum aestivum	unknown
TraesCS1D02G188200	2	{'disease_resistance', 'drought_resistance'}	1D:260588411-260590166	Triticum aestivum	unknown
TraesCS1D02G192200	3	{'disease_resistance', 'salt_resistance', 'drought_resistance'}	1D:267985721-267989531	Triticum aestivum	unknown
TraesCS1D02G195300	2	{'salt_resistance', 'drought_resistance'}	1D:274254630-274255271	Triticum aestivum	unknown
TraesCS1D02G199500	3	{'disease_resistance', 'salt_resistance', 'drought_resistance'}	1D:282281122-282286434	Triticum aestivum	unknown
TraesCS1D02G203300	2	{'disease_resistance', 'plant_height_reduce'}	1D:287456848-287468338	Triticum aestivum	unknown
TraesCS1D02G203400	2	{'disease_resistance', 'plant_height_reduce'}	1D:288082421-288103686	Triticum aestivum	unknown
TraesCS1D02G208900	2	{'disease_resistance', 'drought_resistance'}	1D:295144475-295147521	Triticum aestivum	unknown
TraesCS1D02G219500	2	{'salt_resistance', 'drought_resistance'}	1D:307217310-307219380	Triticum aestivum	unknown
TraesCS1D02G223600	2	{'salt_resistance', 'drought_resistance'}	1D:311366169-311369554	Triticum aestivum	unknown
TraesCS1D02G225000	2	{'salt_resistance', 'drought_resistance'}	1D:313617470-313618243	Triticum aestivum	unknown
TraesCS1D02G225100	3	{'disease_resistance', 'salt_resistance', 'drought_resistance'}	1D:313662662-313663819	Triticum aestivum	unknown
TraesCS1D02G239700	2	{'disease_resistance', 'salt_resistance'}	1D:329665742-329669886	Triticum aestivum	unknown
TraesCS1D02G262700	2	{'disease_resistance', 'plant_height_reduce'}	1D:356928483-356933054	Triticum aestivum	unknown
TraesCS1D02G272600	2	{'salt_resistance', 'drought_resistance'}	1D:366475114-366476973	Triticum aestivum	unknown
TraesCS1D02G290700	2	{'disease_resistance', 'salt_resistance'}	1D:388645449-388653819	Triticum aestivum	unknown
TraesCS1D02G293600	2	{'salt_resistance', 'drought_resistance'}	1D:392696780-392697872	Triticum aestivum	unknown
TraesCS1D02G298500	3	{'disease_resistance', 'salt_resistance', 'drought_resistance'}	1D:397079781-397082358	Triticum aestivum	unknown
TraesCS1D02G306000	2	{'salt_resistance', 'drought_resistance'}	1D:403273278-403277398	Triticum aestivum	unknown
TraesCS1D02G309600	2	{'salt_resistance', 'drought_resistance'}	1D:405365566-405372641	Triticum aestivum	unknown
TraesCS1D02G320800	2	{'disease_resistance', 'salt_resistance'}	1D:414502749-414509485	Triticum aestivum	unknown
TraesCS1D02G327000	3	{'disease_resistance', 'salt_resistance', 'drought_resistance'}	1D:419462373-419466203	Triticum aestivum	unknown
TraesCS1D02G330300	2	{'disease_resistance', 'salt_resistance'}	1D:420855641-420860814	Triticum aestivum	unknown
TraesCS1D02G331200	2	{'disease_resistance', 'drought_resistance'}	1D:421464934-421465644	Triticum aestivum	unknown
TraesCS1D02G346500	3	{'disease_resistance', 'salt_resistance', 'drought_resistance'}	1D:434034136-434036845	Triticum aestivum	unknown
TraesCS1D02G355300	2	{'disease_resistance', 'drought_resistance'}	1D:439927726-439931083	Triticum aestivum	unknown
TraesCS1D02G358200	3	{'disease_resistance', 'salt_resistance', 'drought_resistance'}	1D:441749850-441751968	Triticum aestivum	unknown
TraesCS1D02G361400	3	{'disease_resistance', 'salt_resistance', 'drought_resistance'}	1D:444150824-444152412	Triticum aestivum	unknown
TraesCS1D02G364900	2	{'disease_resistance', 'salt_resistance'}	1D:445542135-445545423	Triticum aestivum	unknown
TraesCS1D02G370600	2	{'salt_resistance', 'drought_resistance'}	1D:449274675-449280352	Triticum aestivum	unknown
TraesCS1D02G376300	2	{'disease_resistance', 'salt_resistance'}	1D:452625185-452627671	Triticum aestivum	unknown
TraesCS1D02G379900	2	{'salt_resistance', 'drought_resistance'}	1D:455772652-455775711	Triticum aestivum	unknown
TraesCS1D02G407000	3	{'disease_resistance', 'salt_resistance', 'drought_resistance'}	1D:470311161-470312000	Triticum aestivum	unknown
TraesCS1D02G407100	3	{'disease_resistance', 'salt_resistance', 'drought_resistance'}	1D:470338499-470339609	Triticum aestivum	unknown
TraesCS1D02G410100	3	{'disease_resistance', 'salt_resistance', 'drought_resistance'}	1D:471618853-471624754	Triticum aestivum	unknown
TraesCS1D02G412500	3	{'disease_resistance', 'salt_resistance', 'drought_resistance'}	1D:473855761-473858616	Triticum aestivum	unknown
TraesCS1D02G422800	3	{'disease_resistance', 'salt_resistance', 'drought_resistance'}	1D:478142725-478147790	Triticum aestivum	unknown
TraesCS1D02G433400	2	{'disease_resistance', 'salt_resistance'}	1D:482836356-482839907	Triticum aestivum	unknown
TraesCS1D02G449700	3	{'disease_resistance', 'salt_resistance', 'drought_resistance'}	1D:491803626-491806869	Triticum aestivum	unknown
TraesCS2A02G003200	2	{'salt_resistance', 'drought_resistance'}	2A:2226935-2231232	Triticum aestivum	unknown
TraesCS2A02G010300	2	{'grain_weight_increase', 'insect_resistance'}	2A:4037703-4041497	Triticum aestivum	unknown
TraesCS2A02G012300	3	{'disease_resistance', 'salt_resistance', 'drought_resistance'}	2A:4907004-4909365	Triticum aestivum	unknown
TraesCS2A02G032000	2	{'disease_resistance', 'salt_resistance'}	2A:14710475-14713996	Triticum aestivum	unknown
TraesCS2A02G032100	2	{'disease_resistance', 'salt_resistance'}	2A:14719737-14723380	Triticum aestivum	unknown
TraesCS2A02G033700	2	{'disease_resistance', 'salt_resistance'}	2A:15001542-15004849	Triticum aestivum	unknown
TraesCS2A02G041600	2	{'disease_resistance', 'drought_resistance'}	2A:16750988-16751809	Triticum aestivum	unknown
TraesCS2A02G056000	3	{'disease_resistance', 'salt_resistance', 'drought_resistance'}	2A:23940804-23949658	Triticum aestivum	unknown
TraesCS2A02G056800	2	{'salt_resistance', 'drought_resistance'}	2A:24058267-24067118	Triticum aestivum	unknown
TraesCS2A02G056900	2	{'salt_resistance', 'drought_resistance'}	2A:24109796-24116702	Triticum aestivum	unknown
TraesCS2A02G057100	2	{'salt_resistance', 'drought_resistance'}	2A:24135598-24145080	Triticum aestivum	unknown
TraesCS2A02G089400	2	{'salt_resistance', 'drought_resistance'}	2A:42494117-42495524	Triticum aestivum	unknown
TraesCS2A02G090600	2	{'salt_resistance', 'plant_height_reduce'}	2A:43297440-43299784	Triticum aestivum	unknown
TraesCS2A02G096800	4	{'disease_resistance', 'grain_weight_increase', 'salt_resistance', 'plant_height_reduce'}	2A:50274828-50279104	Triticum aestivum	unknown
TraesCS2A02G098300	3	{'disease_resistance', 'salt_resistance', 'drought_resistance'}	2A:51582227-51590696	Triticum aestivum	unknown
TraesCS2A02G101000	5	{'grain_weight_increase', 'disease_resistance', 'drought_resistance', 'plant_height_reduce', 'salt_resistance'}	2A:54012215-54014046	Triticum aestivum	unknown
TraesCS2A02G101100	4	{'disease_resistance', 'grain_weight_increase', 'salt_resistance', 'drought_resistance'}	2A:54111812-54113406	Triticum aestivum	unknown
TraesCS2A02G101200	4	{'disease_resistance', 'grain_weight_increase', 'salt_resistance', 'drought_resistance'}	2A:54139933-54141073	Triticum aestivum	unknown
TraesCS2A02G101400	5	{'grain_weight_increase', 'disease_resistance', 'drought_resistance', 'plant_height_reduce', 'salt_resistance'}	2A:54472197-54474276	Triticum aestivum	unknown
TraesCS2A02G102600	3	{'disease_resistance', 'salt_resistance', 'drought_resistance'}	2A:55942785-55948962	Triticum aestivum	unknown
TraesCS2A02G107000	3	{'disease_resistance', 'salt_resistance', 'drought_resistance'}	2A:59322641-59323999	Triticum aestivum	unknown
TraesCS2A02G115200	2	{'salt_resistance', 'drought_resistance'}	2A:65682668-65685886	Triticum aestivum	unknown
TraesCS2A02G122600	3	{'disease_resistance', 'salt_resistance', 'drought_resistance'}	2A:72691495-72695638	Triticum aestivum	unknown
TraesCS2A02G126500	2	{'salt_resistance', 'plant_height_reduce'}	2A:74775671-74777921	Triticum aestivum	unknown
TraesCS2A02G126600	3	{'disease_resistance', 'salt_resistance', 'plant_height_reduce'}	2A:74786064-74787389	Triticum aestivum	unknown
TraesCS2A02G127900	3	{'disease_resistance', 'salt_resistance', 'plant_height_reduce'}	2A:75633969-75635976	Triticum aestivum	unknown
TraesCS2A02G128000	2	{'salt_resistance', 'plant_height_reduce'}	2A:75642371-75644431	Triticum aestivum	unknown
TraesCS2A02G128500	2	{'salt_resistance', 'drought_resistance'}	2A:76361311-76367502	Triticum aestivum	unknown
TraesCS2A02G163800	3	{'disease_resistance', 'salt_resistance', 'drought_resistance'}	2A:116013921-116019018	Triticum aestivum	unknown
TraesCS2A02G163900	2	{'disease_resistance', 'salt_resistance'}	2A:116152514-116154927	Triticum aestivum	unknown
TraesCS2A02G186100	2	{'salt_resistance', 'plant_height_reduce'}	2A:147541341-147542948	Triticum aestivum	unknown
TraesCS2A02G186200	3	{'disease_resistance', 'salt_resistance', 'plant_height_reduce'}	2A:147548379-147550734	Triticum aestivum	unknown
TraesCS2A02G187400	2	{'salt_resistance', 'drought_resistance'}	2A:149208513-149209680	Triticum aestivum	unknown
TraesCS2A02G199700	2	{'disease_resistance', 'salt_resistance'}	2A:172214508-172218294	Triticum aestivum	unknown
TraesCS2A02G211200	2	{'disease_resistance', 'salt_resistance'}	2A:195347577-195358458	Triticum aestivum	unknown
TraesCS2A02G211300	2	{'disease_resistance', 'salt_resistance'}	2A:195644489-195649040	Triticum aestivum	unknown
TraesCS2A02G211900	2	{'disease_resistance', 'salt_resistance'}	2A:196498824-196505679	Triticum aestivum	unknown
TraesCS2A02G214000	2	{'salt_resistance', 'plant_height_reduce'}	2A:199713870-199715915	Triticum aestivum	unknown
TraesCS2A02G214100	2	{'salt_resistance', 'plant_height_reduce'}	2A:199727025-199729043	Triticum aestivum	unknown
TraesCS2A02G223100	2	{'disease_resistance', 'salt_resistance'}	2A:215747549-215752196	Triticum aestivum	unknown
TraesCS2A02G238700	3	{'disease_resistance', 'grain_weight_increase', 'plant_height_reduce'}	2A:323528641-323530709	Triticum aestivum	unknown
TraesCS2A02G239900	2	{'disease_resistance', 'salt_resistance'}	2A:333724200-333771117	Triticum aestivum	unknown
TraesCS2A02G248200	2	{'disease_resistance', 'salt_resistance'}	2A:369498016-369503089	Triticum aestivum	unknown
TraesCS2A02G250600	3	{'disease_resistance', 'salt_resistance', 'drought_resistance'}	2A:378396343-378398432	Triticum aestivum	unknown
TraesCS2A02G261200	2	{'disease_resistance', 'plant_height_reduce'}	2A:411943192-411950517	Triticum aestivum	unknown
TraesCS2A02G268800	2	{'salt_resistance', 'drought_resistance'}	2A:432591407-432593021	Triticum aestivum	unknown
TraesCS2A02G273100	2	{'salt_resistance', 'drought_resistance'}	2A:447284678-447287744	Triticum aestivum	unknown
TraesCS2A02G293200	2	{'salt_resistance', 'drought_resistance'}	2A:504284771-504290294	Triticum aestivum	unknown
TraesCS2A02G303900	3	{'disease_resistance', 'salt_resistance', 'drought_resistance'}	2A:522072400-522077216	Triticum aestivum	unknown
TraesCS2A02G311200	2	{'salt_resistance', 'drought_resistance'}	2A:534631870-534634396	Triticum aestivum	unknown
TraesCS2A02G311500	2	{'grain_weight_increase', 'salt_resistance'}	2A:535240748-535242301	Triticum aestivum	unknown
TraesCS2A02G311900	2	{'disease_resistance', 'drought_resistance'}	2A:535710625-535716241	Triticum aestivum	unknown
TraesCS2A02G317000	3	{'disease_resistance', 'salt_resistance', 'drought_resistance'}	2A:542648355-542654469	Triticum aestivum	unknown
TraesCS2A02G331800	2	{'disease_resistance', 'grain_weight_increase'}	2A:564616807-564620855	Triticum aestivum	unknown
TraesCS2A02G338300	5	{'grain_weight_increase', 'disease_resistance', 'drought_resistance', 'plant_height_reduce', 'salt_resistance'}	2A:572614556-572616351	Triticum aestivum	unknown
TraesCS2A02G371600	2	{'salt_resistance', 'plant_height_reduce'}	2A:613987781-613989817	Triticum aestivum	unknown
TraesCS2A02G371700	2	{'salt_resistance', 'plant_height_reduce'}	2A:613991326-613993780	Triticum aestivum	unknown
TraesCS2A02G385200	2	{'salt_resistance', 'drought_resistance'}	2A:631536603-631541376	Triticum aestivum	unknown
TraesCS2A02G398300	3	{'disease_resistance', 'grain_weight_increase', 'plant_height_reduce'}	2A:651752444-651753590	Triticum aestivum	unknown
TraesCS2A02G400600	2	{'disease_resistance', 'grain_weight_increase'}	2A:654364565-654369673	Triticum aestivum	unknown
TraesCS2A02G407200	2	{'disease_resistance', 'salt_resistance'}	2A:662905054-662907850	Triticum aestivum	unknown
TraesCS2A02G417100	3	{'disease_resistance', 'salt_resistance', 'drought_resistance'}	2A:673194842-673196226	Triticum aestivum	unknown
TraesCS2A02G417200	3	{'disease_resistance', 'salt_resistance', 'drought_resistance'}	2A:673276475-673277485	Triticum aestivum	unknown
TraesCS2A02G417300	3	{'disease_resistance', 'salt_resistance', 'drought_resistance'}	2A:673326836-673328368	Triticum aestivum	unknown
TraesCS2A02G426200	2	{'disease_resistance', 'drought_resistance'}	2A:679884541-679889714	Triticum aestivum	unknown
TraesCS2A02G430300	2	{'disease_resistance', 'salt_resistance'}	2A:683516263-683523720	Triticum aestivum	unknown
TraesCS2A02G451500	2	{'salt_resistance', 'drought_resistance'}	2A:700980271-700989852	Triticum aestivum	unknown
TraesCS2A02G463900	2	{'salt_resistance', 'drought_resistance'}	2A:709701089-709714220	Triticum aestivum	unknown
TraesCS2A02G484800	2	{'disease_resistance', 'salt_resistance'}	2A:719728585-719735113	Triticum aestivum	unknown
TraesCS2A02G485100	2	{'disease_resistance', 'salt_resistance'}	2A:720059493-720062716	Triticum aestivum	unknown
TraesCS2A02G485600	2	{'disease_resistance', 'salt_resistance'}	2A:721008029-721021371	Triticum aestivum	unknown
TraesCS2A02G485700	2	{'disease_resistance', 'salt_resistance'}	2A:721104174-721107083	Triticum aestivum	unknown
TraesCS2A02G486400	2	{'disease_resistance', 'salt_resistance'}	2A:721599477-721604119	Triticum aestivum	unknown
TraesCS2A02G486600	2	{'disease_resistance', 'salt_resistance'}	2A:721724588-721729682	Triticum aestivum	unknown
TraesCS2A02G489500	3	{'disease_resistance', 'salt_resistance', 'drought_resistance'}	2A:723358546-723360224	Triticum aestivum	unknown
TraesCS2A02G506500	2	{'salt_resistance', 'drought_resistance'}	2A:734347340-734352307	Triticum aestivum	unknown
TraesCS2A02G512100	3	{'disease_resistance', 'salt_resistance', 'drought_resistance'}	2A:737046055-737049316	Triticum aestivum	unknown
TraesCS2A02G515700	2	{'salt_resistance', 'drought_resistance'}	2A:739709710-739713978	Triticum aestivum	unknown
TraesCS2A02G533400	2	{'disease_resistance', 'salt_resistance'}	2A:749385143-749389561	Triticum aestivum	unknown
TraesCS2A02G534400	2	{'disease_resistance', 'salt_resistance'}	2A:749950777-749955471	Triticum aestivum	unknown
TraesCS2A02G536400	2	{'disease_resistance', 'salt_resistance'}	2A:750560638-750566069	Triticum aestivum	unknown
TraesCS2A02G536500	2	{'disease_resistance', 'salt_resistance'}	2A:750567902-750571987	Triticum aestivum	unknown
TraesCS2A02G537900	2	{'disease_resistance', 'salt_resistance'}	2A:751206566-751211137	Triticum aestivum	unknown
TraesCS2A02G538100	2	{'disease_resistance', 'salt_resistance'}	2A:751231674-751234847	Triticum aestivum	unknown
TraesCS2A02G538200	2	{'disease_resistance', 'salt_resistance'}	2A:751236148-751240233	Triticum aestivum	unknown
TraesCS2A02G538300	2	{'disease_resistance', 'salt_resistance'}	2A:751267535-751270418	Triticum aestivum	unknown
TraesCS2A02G545700	3	{'disease_resistance', 'salt_resistance', 'drought_resistance'}	2A:754448621-754452155	Triticum aestivum	unknown
TraesCS2A02G546300	3	{'disease_resistance', 'salt_resistance', 'drought_resistance'}	2A:755118457-755120126	Triticum aestivum	unknown
TraesCS2A02G546700	3	{'disease_resistance', 'salt_resistance', 'drought_resistance'}	2A:755339320-755340939	Triticum aestivum	unknown
TraesCS2A02G547500	2	{'disease_resistance', 'salt_resistance'}	2A:755702713-755706239	Triticum aestivum	unknown
TraesCS2A02G566700	3	{'disease_resistance', 'salt_resistance', 'drought_resistance'}	2A:765760972-765762877	Triticum aestivum	unknown
TraesCS2B02G040000	2	{'salt_resistance', 'drought_resistance'}	2B:18177103-18178722	Triticum aestivum	unknown
TraesCS2B02G043400	2	{'disease_resistance', 'salt_resistance'}	2B:20143789-20147935	Triticum aestivum	unknown
TraesCS2B02G053500	2	{'salt_resistance', 'plant_height_reduce'}	2B:26290861-26293065	Triticum aestivum	unknown
TraesCS2B02G054000	2	{'disease_resistance', 'drought_resistance'}	2B:26354237-26355125	Triticum aestivum	unknown
TraesCS2B02G067700	3	{'disease_resistance', 'salt_resistance', 'drought_resistance'}	2B:34434778-34435883	Triticum aestivum	unknown
TraesCS2B02G067800	3	{'disease_resistance', 'salt_resistance', 'drought_resistance'}	2B:34453977-34455082	Triticum aestivum	unknown
TraesCS2B02G067900	3	{'disease_resistance', 'salt_resistance', 'drought_resistance'}	2B:34475468-34476581	Triticum aestivum	unknown
TraesCS2B02G068000	3	{'disease_resistance', 'salt_resistance', 'drought_resistance'}	2B:34538203-34542232	Triticum aestivum	unknown
TraesCS2B02G104400	2	{'disease_resistance', 'salt_resistance'}	2B:65045380-65049036	Triticum aestivum	unknown
TraesCS2B02G106200	3	{'disease_resistance', 'salt_resistance', 'plant_height_reduce'}	2B:67079728-67081785	Triticum aestivum	unknown
TraesCS2B02G112100	4	{'disease_resistance', 'grain_weight_increase', 'salt_resistance', 'plant_height_reduce'}	2B:74834890-74838725	Triticum aestivum	unknown
TraesCS2B02G115700	2	{'salt_resistance', 'drought_resistance'}	2B:79246730-79248684	Triticum aestivum	unknown
TraesCS2B02G118200	3	{'disease_resistance', 'salt_resistance', 'drought_resistance'}	2B:82361173-82362952	Triticum aestivum	unknown
TraesCS2B02G118300	2	{'grain_weight_increase', 'salt_resistance'}	2B:82713779-82715637	Triticum aestivum	unknown
TraesCS2B02G118400	5	{'grain_weight_increase', 'disease_resistance', 'drought_resistance', 'plant_height_reduce', 'salt_resistance'}	2B:82851554-82853290	Triticum aestivum	unknown
TraesCS2B02G118500	5	{'grain_weight_increase', 'disease_resistance', 'drought_resistance', 'plant_height_reduce', 'salt_resistance'}	2B:83953621-83955548	Triticum aestivum	unknown
TraesCS2B02G119700	3	{'disease_resistance', 'salt_resistance', 'drought_resistance'}	2B:87350408-87356624	Triticum aestivum	unknown
TraesCS2B02G134500	2	{'salt_resistance', 'drought_resistance'}	2B:100918212-100921058	Triticum aestivum	unknown
TraesCS2B02G150100	2	{'salt_resistance', 'plant_height_reduce'}	2B:116410013-116416006	Triticum aestivum	unknown
TraesCS2B02G150600	2	{'salt_resistance', 'drought_resistance'}	2B:117626176-117633073	Triticum aestivum	unknown
TraesCS2B02G158700	3	{'disease_resistance', 'salt_resistance', 'plant_height_reduce'}	2B:132509649-132511896	Triticum aestivum	unknown
TraesCS2B02G158800	3	{'disease_resistance', 'salt_resistance', 'plant_height_reduce'}	2B:132516955-132519478	Triticum aestivum	unknown
TraesCS2B02G189700	2	{'disease_resistance', 'salt_resistance'}	2B:165244219-165246318	Triticum aestivum	unknown
TraesCS2B02G189800	2	{'disease_resistance', 'salt_resistance'}	2B:165250392-165253311	Triticum aestivum	unknown
TraesCS2B02G219900	2	{'salt_resistance', 'drought_resistance'}	2B:210457010-210458357	Triticum aestivum	unknown
TraesCS2B02G220700	3	{'disease_resistance', 'salt_resistance', 'plant_height_reduce'}	2B:210930524-210932799	Triticum aestivum	unknown
TraesCS2B02G220900	3	{'disease_resistance', 'salt_resistance', 'plant_height_reduce'}	2B:211153210-211155338	Triticum aestivum	unknown
TraesCS2B02G221100	3	{'disease_resistance', 'salt_resistance', 'plant_height_reduce'}	2B:211187306-211189345	Triticum aestivum	unknown
TraesCS2B02G221200	3	{'disease_resistance', 'salt_resistance', 'plant_height_reduce'}	2B:211191392-211193401	Triticum aestivum	unknown
TraesCS2B02G226200	2	{'disease_resistance', 'plant_height_reduce'}	2B:216942157-216944463	Triticum aestivum	unknown
TraesCS2B02G236800	2	{'disease_resistance', 'salt_resistance'}	2B:237579018-237586892	Triticum aestivum	unknown
TraesCS2B02G236900	2	{'disease_resistance', 'salt_resistance'}	2B:237639088-237644062	Triticum aestivum	unknown
TraesCS2B02G248700	2	{'disease_resistance', 'salt_resistance'}	2B:255050988-255055240	Triticum aestivum	unknown
TraesCS2B02G254100	2	{'salt_resistance', 'insect_resistance'}	2B:281881110-281885828	Triticum aestivum	unknown
TraesCS2B02G256600	3	{'disease_resistance', 'grain_weight_increase', 'plant_height_reduce'}	2B:298324714-298327379	Triticum aestivum	unknown
TraesCS2B02G268400	3	{'disease_resistance', 'salt_resistance', 'drought_resistance'}	2B:363341361-363343965	Triticum aestivum	unknown
TraesCS2B02G269200	2	{'disease_resistance', 'salt_resistance'}	2B:364729261-364734398	Triticum aestivum	unknown
TraesCS2B02G287600	2	{'salt_resistance', 'drought_resistance'}	2B:396956740-396958133	Triticum aestivum	unknown
TraesCS2B02G304800	3	{'disease_resistance', 'salt_resistance', 'drought_resistance'}	2B:434099239-434101274	Triticum aestivum	unknown
TraesCS2B02G309700	2	{'salt_resistance', 'drought_resistance'}	2B:442785651-442791643	Triticum aestivum	unknown
TraesCS2B02G328100	2	{'salt_resistance', 'drought_resistance'}	2B:470065723-470068565	Triticum aestivum	unknown
TraesCS2B02G328900	2	{'disease_resistance', 'drought_resistance'}	2B:471441139-471446750	Triticum aestivum	unknown
TraesCS2B02G335400	3	{'disease_resistance', 'salt_resistance', 'drought_resistance'}	2B:478901181-478907709	Triticum aestivum	unknown
TraesCS2B02G343600	5	{'grain_weight_increase', 'disease_resistance', 'drought_resistance', 'plant_height_reduce', 'salt_resistance'}	2B:489418533-489420311	Triticum aestivum	unknown
TraesCS2B02G344000	2	{'disease_resistance', 'plant_height_reduce'}	2B:490319235-490333678	Triticum aestivum	unknown
TraesCS2B02G350400	2	{'disease_resistance', 'grain_weight_increase'}	2B:497795514-497799657	Triticum aestivum	unknown
TraesCS2B02G402100	2	{'salt_resistance', 'drought_resistance'}	2B:570894310-570899124	Triticum aestivum	unknown
TraesCS2B02G416300	3	{'disease_resistance', 'grain_weight_increase', 'plant_height_reduce'}	2B:594982278-594983776	Triticum aestivum	unknown
TraesCS2B02G417900	2	{'disease_resistance', 'drought_resistance'}	2B:598560483-598562634	Triticum aestivum	unknown
TraesCS2B02G418700	2	{'disease_resistance', 'grain_weight_increase'}	2B:599999675-600003799	Triticum aestivum	unknown
TraesCS2B02G424900	2	{'disease_resistance', 'salt_resistance'}	2B:610924597-610927456	Triticum aestivum	unknown
TraesCS2B02G436100	3	{'disease_resistance', 'salt_resistance', 'drought_resistance'}	2B:626650526-626652000	Triticum aestivum	unknown
TraesCS2B02G436200	3	{'disease_resistance', 'salt_resistance', 'drought_resistance'}	2B:626883071-626884401	Triticum aestivum	unknown
TraesCS2B02G436300	3	{'disease_resistance', 'salt_resistance', 'drought_resistance'}	2B:627073001-627074499	Triticum aestivum	unknown
TraesCS2B02G442400	2	{'salt_resistance', 'drought_resistance'}	2B:635339351-635345474	Triticum aestivum	unknown
TraesCS2B02G446500	2	{'disease_resistance', 'drought_resistance'}	2B:639218764-639223370	Triticum aestivum	unknown
TraesCS2B02G450900	2	{'disease_resistance', 'salt_resistance'}	2B:644151087-644158595	Triticum aestivum	unknown
TraesCS2B02G472800	2	{'salt_resistance', 'drought_resistance'}	2B:669435939-669444373	Triticum aestivum	unknown
TraesCS2B02G473000	2	{'salt_resistance', 'drought_resistance'}	2B:669663463-669670514	Triticum aestivum	unknown
TraesCS2B02G478100	2	{'disease_resistance', 'salt_resistance'}	2B:675351933-675356819	Triticum aestivum	unknown
TraesCS2B02G510900	2	{'disease_resistance', 'salt_resistance'}	2B:706729195-706733350	Triticum aestivum	unknown
TraesCS2B02G511200	2	{'disease_resistance', 'salt_resistance'}	2B:706921887-706925372	Triticum aestivum	unknown
TraesCS2B02G511300	2	{'disease_resistance', 'salt_resistance'}	2B:707239111-707242589	Triticum aestivum	unknown
TraesCS2B02G511600	2	{'disease_resistance', 'salt_resistance'}	2B:707414118-707418231	Triticum aestivum	unknown
TraesCS2B02G511700	2	{'disease_resistance', 'salt_resistance'}	2B:707461716-707464712	Triticum aestivum	unknown
TraesCS2B02G512000	2	{'disease_resistance', 'salt_resistance'}	2B:707655494-707659983	Triticum aestivum	unknown
TraesCS2B02G512300	2	{'disease_resistance', 'salt_resistance'}	2B:707959038-707964287	Triticum aestivum	unknown
TraesCS2B02G512400	2	{'disease_resistance', 'salt_resistance'}	2B:707966657-707970348	Triticum aestivum	unknown
TraesCS2B02G513000	2	{'disease_resistance', 'salt_resistance'}	2B:708207270-708212322	Triticum aestivum	unknown
TraesCS2B02G513600	2	{'disease_resistance', 'salt_resistance'}	2B:708709669-708716325	Triticum aestivum	unknown
TraesCS2B02G517400	3	{'disease_resistance', 'salt_resistance', 'drought_resistance'}	2B:712318148-712319762	Triticum aestivum	unknown
TraesCS2B02G529200	2	{'salt_resistance', 'drought_resistance'}	2B:723962714-723963618	Triticum aestivum	unknown
TraesCS2B02G534800	2	{'salt_resistance', 'drought_resistance'}	2B:730999882-731004636	Triticum aestivum	unknown
TraesCS2B02G540100	3	{'disease_resistance', 'salt_resistance', 'drought_resistance'}	2B:736243667-736247552	Triticum aestivum	unknown
TraesCS2B02G544200	2	{'salt_resistance', 'drought_resistance'}	2B:741442860-741447379	Triticum aestivum	unknown
TraesCS2B02G562100	2	{'disease_resistance', 'salt_resistance'}	2B:754648834-754654726	Triticum aestivum	unknown
TraesCS2B02G565000	2	{'disease_resistance', 'salt_resistance'}	2B:756602966-756606224	Triticum aestivum	unknown
TraesCS2B02G566100	2	{'disease_resistance', 'salt_resistance'}	2B:757257466-757272329	Triticum aestivum	unknown
TraesCS2B02G567000	2	{'disease_resistance', 'salt_resistance'}	2B:758114830-758119793	Triticum aestivum	unknown
TraesCS2B02G567100	2	{'disease_resistance', 'salt_resistance'}	2B:758121264-758125333	Triticum aestivum	unknown
TraesCS2B02G567500	2	{'disease_resistance', 'salt_resistance'}	2B:758555172-758562969	Triticum aestivum	unknown
TraesCS2B02G567700	2	{'disease_resistance', 'salt_resistance'}	2B:758666330-758671629	Triticum aestivum	unknown
TraesCS2B02G567800	2	{'disease_resistance', 'salt_resistance'}	2B:758798235-758802375	Triticum aestivum	unknown
TraesCS2B02G568000	2	{'disease_resistance', 'salt_resistance'}	2B:758896379-758900530	Triticum aestivum	unknown
TraesCS2B02G568500	2	{'disease_resistance', 'salt_resistance'}	2B:759344661-759348351	Triticum aestivum	unknown
TraesCS2B02G568600	2	{'disease_resistance', 'salt_resistance'}	2B:759438473-759442471	Triticum aestivum	unknown
TraesCS2B02G573700	3	{'disease_resistance', 'salt_resistance', 'drought_resistance'}	2B:763473867-763475547	Triticum aestivum	unknown
TraesCS2B02G576300	3	{'disease_resistance', 'salt_resistance', 'drought_resistance'}	2B:765276335-765279904	Triticum aestivum	unknown
TraesCS2B02G577300	3	{'disease_resistance', 'salt_resistance', 'drought_resistance'}	2B:765586342-765588061	Triticum aestivum	unknown
TraesCS2B02G577500	3	{'disease_resistance', 'salt_resistance', 'drought_resistance'}	2B:765791385-765793061	Triticum aestivum	unknown
TraesCS2B02G578200	2	{'disease_resistance', 'salt_resistance'}	2B:766231802-766235142	Triticum aestivum	unknown
TraesCS2B02G630000	3	{'disease_resistance', 'salt_resistance', 'drought_resistance'}	2B:801162070-801163970	Triticum aestivum	unknown
TraesCS2D02G013000	3	{'disease_resistance', 'salt_resistance', 'drought_resistance'}	2D:6507849-6509790	Triticum aestivum	unknown
TraesCS2D02G028600	2	{'salt_resistance', 'drought_resistance'}	2D:11774695-11775912	Triticum aestivum	unknown
TraesCS2D02G031600	2	{'disease_resistance', 'salt_resistance'}	2D:12631062-12634703	Triticum aestivum	unknown
TraesCS2D02G039400	2	{'salt_resistance', 'plant_height_reduce'}	2D:14394564-14396714	Triticum aestivum	unknown
TraesCS2D02G039800	2	{'disease_resistance', 'drought_resistance'}	2D:14443231-14443818	Triticum aestivum	unknown
TraesCS2D02G050700	2	{'disease_resistance', 'salt_resistance'}	2D:18755065-18763417	Triticum aestivum	unknown
TraesCS2D02G055800	2	{'salt_resistance', 'drought_resistance'}	2D:22386040-22393054	Triticum aestivum	unknown
TraesCS2D02G056300	2	{'salt_resistance', 'drought_resistance'}	2D:22469792-22480343	Triticum aestivum	unknown
TraesCS2D02G087500	2	{'salt_resistance', 'drought_resistance'}	2D:37645202-37646542	Triticum aestivum	unknown
TraesCS2D02G088400	2	{'salt_resistance', 'plant_height_reduce'}	2D:38237536-38238988	Triticum aestivum	unknown
TraesCS2D02G088500	3	{'disease_resistance', 'salt_resistance', 'plant_height_reduce'}	2D:38250501-38252827	Triticum aestivum	unknown
TraesCS2D02G095300	4	{'disease_resistance', 'grain_weight_increase', 'salt_resistance', 'plant_height_reduce'}	2D:47220570-47224493	Triticum aestivum	unknown
TraesCS2D02G097700	3	{'disease_resistance', 'salt_resistance', 'drought_resistance'}	2D:49879249-49884545	Triticum aestivum	unknown
TraesCS2D02G098700	2	{'salt_resistance', 'drought_resistance'}	2D:50988440-50990520	Triticum aestivum	unknown
TraesCS2D02G100600	5	{'grain_weight_increase', 'disease_resistance', 'drought_resistance', 'plant_height_reduce', 'salt_resistance'}	2D:52646885-52648518	Triticum aestivum	unknown
TraesCS2D02G100800	2	{'grain_weight_increase', 'salt_resistance'}	2D:52959503-52960664	Triticum aestivum	unknown
TraesCS2D02G100900	5	{'grain_weight_increase', 'disease_resistance', 'drought_resistance', 'plant_height_reduce', 'salt_resistance'}	2D:53648855-53650859	Triticum aestivum	unknown
TraesCS2D02G102100	3	{'disease_resistance', 'salt_resistance', 'drought_resistance'}	2D:55153230-55159382	Triticum aestivum	unknown
TraesCS2D02G106800	3	{'disease_resistance', 'salt_resistance', 'drought_resistance'}	2D:59005695-59009533	Triticum aestivum	unknown
TraesCS2D02G116100	2	{'salt_resistance', 'drought_resistance'}	2D:64597245-64601888	Triticum aestivum	unknown
TraesCS2D02G129000	2	{'salt_resistance', 'plant_height_reduce'}	2D:74991351-74993500	Triticum aestivum	unknown
TraesCS2D02G129100	2	{'salt_resistance', 'plant_height_reduce'}	2D:74998896-75001312	Triticum aestivum	unknown
TraesCS2D02G130500	2	{'salt_resistance', 'plant_height_reduce'}	2D:75750744-75752774	Triticum aestivum	unknown
TraesCS2D02G130600	3	{'disease_resistance', 'salt_resistance', 'plant_height_reduce'}	2D:75754010-75756010	Triticum aestivum	unknown
TraesCS2D02G131000	2	{'salt_resistance', 'drought_resistance'}	2D:76545536-76552289	Triticum aestivum	unknown
TraesCS2D02G137400	2	{'salt_resistance', 'plant_height_reduce'}	2D:80833580-80835763	Triticum aestivum	unknown
TraesCS2D02G168600	3	{'disease_resistance', 'salt_resistance', 'drought_resistance'}	2D:112549364-112550846	Triticum aestivum	unknown
TraesCS2D02G170800	2	{'disease_resistance', 'salt_resistance'}	2D:114675756-114695739	Triticum aestivum	unknown
TraesCS2D02G170900	2	{'disease_resistance', 'salt_resistance'}	2D:114727625-114730603	Triticum aestivum	unknown
TraesCS2D02G200500	2	{'salt_resistance', 'drought_resistance'}	2D:152097422-152098713	Triticum aestivum	unknown
TraesCS2D02G201400	3	{'disease_resistance', 'salt_resistance', 'plant_height_reduce'}	2D:153001051-153003090	Triticum aestivum	unknown
TraesCS2D02G201700	3	{'disease_resistance', 'salt_resistance', 'plant_height_reduce'}	2D:153271857-153274267	Triticum aestivum	unknown
TraesCS2D02G206600	2	{'disease_resistance', 'plant_height_reduce'}	2D:159852498-159854579	Triticum aestivum	unknown
TraesCS2D02G207400	2	{'disease_resistance', 'salt_resistance'}	2D:161373419-161377378	Triticum aestivum	unknown
TraesCS2D02G217400	2	{'disease_resistance', 'salt_resistance'}	2D:180926044-180934087	Triticum aestivum	unknown
TraesCS2D02G217500	2	{'disease_resistance', 'salt_resistance'}	2D:180990370-180995121	Triticum aestivum	unknown
TraesCS2D02G217600	2	{'disease_resistance', 'salt_resistance'}	2D:181256926-181262484	Triticum aestivum	unknown
TraesCS2D02G219800	2	{'salt_resistance', 'plant_height_reduce'}	2D:186995581-186997635	Triticum aestivum	unknown
TraesCS2D02G219900	2	{'salt_resistance', 'plant_height_reduce'}	2D:187107468-187109868	Triticum aestivum	unknown
TraesCS2D02G245700	2	{'disease_resistance', 'salt_resistance'}	2D:284512874-284577109	Triticum aestivum	unknown
TraesCS2D02G249900	2	{'disease_resistance', 'salt_resistance'}	2D:296848612-296853319	Triticum aestivum	unknown
TraesCS2D02G251600	3	{'disease_resistance', 'salt_resistance', 'drought_resistance'}	2D:301377821-301379976	Triticum aestivum	unknown
TraesCS2D02G252600	3	{'disease_resistance', 'salt_resistance', 'drought_resistance'}	2D:304640756-304644667	Triticum aestivum	unknown
TraesCS2D02G262700	2	{'disease_resistance', 'plant_height_reduce'}	2D:318910256-318917674	Triticum aestivum	unknown
TraesCS2D02G272400	2	{'salt_resistance', 'drought_resistance'}	2D:337134138-337137717	Triticum aestivum	unknown
TraesCS2D02G291000	2	{'salt_resistance', 'drought_resistance'}	2D:373215743-373221603	Triticum aestivum	unknown
TraesCS2D02G300700	2	{'salt_resistance', 'drought_resistance'}	2D:383093295-383094206	Triticum aestivum	unknown
TraesCS2D02G302500	3	{'disease_resistance', 'salt_resistance', 'drought_resistance'}	2D:386248395-386253037	Triticum aestivum	unknown
TraesCS2D02G309400	2	{'salt_resistance', 'drought_resistance'}			unknown
TraesCS2D02G309800	2	{'grain_weight_increase', 'salt_resistance'}	2D:398085908-398087481	Triticum aestivum	unknown
TraesCS2D02G310200	2	{'disease_resistance', 'drought_resistance'}	2D:398462772-398468090	Triticum aestivum	unknown
TraesCS2D02G311400	2	{'disease_resistance', 'salt_resistance'}	2D:400297654-400298672	Triticum aestivum	unknown
TraesCS2D02G313400	2	{'disease_resistance', 'insect_resistance'}	2D:403209299-403213734	Triticum aestivum	unknown
TraesCS2D02G314900	3	{'disease_resistance', 'salt_resistance', 'drought_resistance'}	2D:404387472-404394532	Triticum aestivum	unknown
TraesCS2D02G325000	2	{'disease_resistance', 'plant_height_reduce'}	2D:418044489-418059958	Triticum aestivum	unknown
TraesCS2D02G331100	2	{'disease_resistance', 'grain_weight_increase'}	2D:423853301-423857387	Triticum aestivum	unknown
TraesCS2D02G342500	2	{'salt_resistance', 'insect_resistance'}	2D:437947293-437951806	Triticum aestivum	unknown
TraesCS2D02G367900	3	{'disease_resistance', 'salt_resistance', 'plant_height_reduce'}	2D:472466320-472469314	Triticum aestivum	unknown
TraesCS2D02G368000	2	{'salt_resistance', 'plant_height_reduce'}	2D:472469938-472472761	Triticum aestivum	unknown
TraesCS2D02G381800	2	{'salt_resistance', 'drought_resistance'}	2D:485983997-485987988	Triticum aestivum	unknown
TraesCS2D02G381900	2	{'salt_resistance', 'drought_resistance'}	2D:485989384-485994221	Triticum aestivum	unknown
TraesCS2D02G391400	2	{'disease_resistance', 'drought_resistance'}	2D:498531944-498533001	Triticum aestivum	unknown
TraesCS2D02G395900	3	{'disease_resistance', 'grain_weight_increase', 'plant_height_reduce'}	2D:506941472-506942539	Triticum aestivum	unknown
TraesCS2D02G397500	2	{'disease_resistance', 'drought_resistance'}	2D:509229163-509231203	Triticum aestivum	unknown
TraesCS2D02G398200	2	{'disease_resistance', 'grain_weight_increase'}	2D:510615054-510618995	Triticum aestivum	unknown
TraesCS2D02G404200	2	{'disease_resistance', 'salt_resistance'}	2D:518612930-518615894	Triticum aestivum	unknown
TraesCS2D02G414500	3	{'disease_resistance', 'salt_resistance', 'drought_resistance'}	2D:528588877-528590154	Triticum aestivum	unknown
TraesCS2D02G420400	2	{'salt_resistance', 'drought_resistance'}	2D:534358713-534364958	Triticum aestivum	unknown
TraesCS2D02G427900	2	{'disease_resistance', 'salt_resistance'}	2D:539881104-539888438	Triticum aestivum	unknown
TraesCS2D02G451100	2	{'salt_resistance', 'drought_resistance'}	2D:560957695-560965769	Triticum aestivum	unknown
TraesCS2D02G451300	2	{'salt_resistance', 'drought_resistance'}	2D:561026302-561033301	Triticum aestivum	unknown
TraesCS2D02G456400	2	{'disease_resistance', 'salt_resistance'}	2D:564088214-564096217	Triticum aestivum	unknown
TraesCS2D02G464800	2	{'salt_resistance', 'drought_resistance'}	2D:570948155-570960445	Triticum aestivum	unknown
TraesCS2D02G484700	2	{'disease_resistance', 'salt_resistance'}	2D:585685719-585690307	Triticum aestivum	unknown
TraesCS2D02G484800	2	{'disease_resistance', 'salt_resistance'}	2D:585692639-585695730	Triticum aestivum	unknown
TraesCS2D02G485000	2	{'disease_resistance', 'salt_resistance'}	2D:585736393-585740674	Triticum aestivum	unknown
TraesCS2D02G485200	2	{'disease_resistance', 'salt_resistance'}	2D:585892934-585896971	Triticum aestivum	unknown
TraesCS2D02G485300	2	{'disease_resistance', 'salt_resistance'}	2D:585913685-585916891	Triticum aestivum	unknown
TraesCS2D02G486300	2	{'disease_resistance', 'salt_resistance'}	2D:586789486-586794667	Triticum aestivum	unknown
TraesCS2D02G486800	2	{'disease_resistance', 'salt_resistance'}	2D:586957083-586961710	Triticum aestivum	unknown
TraesCS2D02G493700	3	{'disease_resistance', 'salt_resistance', 'drought_resistance'}	2D:591027189-591031752	Triticum aestivum	unknown
TraesCS2D02G511600	2	{'salt_resistance', 'drought_resistance'}	2D:603137299-603142307	Triticum aestivum	unknown
TraesCS2D02G513600	3	{'disease_resistance', 'salt_resistance', 'drought_resistance'}	2D:605709849-605713768	Triticum aestivum	unknown
TraesCS2D02G535600	2	{'disease_resistance', 'salt_resistance'}	2D:618333401-618338134	Triticum aestivum	unknown
TraesCS2D02G536900	2	{'disease_resistance', 'salt_resistance'}	2D:619090113-619093441	Triticum aestivum	unknown
TraesCS2D02G537100	2	{'disease_resistance', 'salt_resistance'}	2D:619144980-619148791	Triticum aestivum	unknown
TraesCS2D02G537700	2	{'disease_resistance', 'salt_resistance'}	2D:619401525-619406947	Triticum aestivum	unknown
TraesCS2D02G537800	2	{'disease_resistance', 'salt_resistance'}	2D:619408160-619411679	Triticum aestivum	unknown
TraesCS2D02G537900	2	{'disease_resistance', 'salt_resistance'}	2D:619411757-619416346	Triticum aestivum	unknown
TraesCS2D02G538200	2	{'disease_resistance', 'salt_resistance'}	2D:619496930-619503129	Triticum aestivum	unknown
TraesCS2D02G538400	2	{'disease_resistance', 'salt_resistance'}	2D:619566031-619569826	Triticum aestivum	unknown
TraesCS2D02G538500	2	{'disease_resistance', 'salt_resistance'}	2D:619572151-619577236	Triticum aestivum	unknown
TraesCS2D02G538900	2	{'disease_resistance', 'salt_resistance'}	2D:619663455-619666126	Triticum aestivum	unknown
TraesCS2D02G539100	2	{'disease_resistance', 'salt_resistance'}	2D:619700233-619704224	Triticum aestivum	unknown
TraesCS2D02G546600	3	{'disease_resistance', 'salt_resistance', 'drought_resistance'}	2D:623325816-623329328	Triticum aestivum	unknown
TraesCS2D02G547600	3	{'disease_resistance', 'salt_resistance', 'drought_resistance'}	2D:623947680-623949277	Triticum aestivum	unknown
TraesCS2D02G547800	3	{'disease_resistance', 'salt_resistance', 'drought_resistance'}	2D:624052663-624054189	Triticum aestivum	unknown
TraesCS2D02G548600	2	{'disease_resistance', 'salt_resistance'}	2D:624303022-624307432	Triticum aestivum	unknown
TraesCS2D02G590100	3	{'disease_resistance', 'salt_resistance', 'drought_resistance'}	2D:646256579-646271866	Triticum aestivum	unknown
TraesCS3A02G016200	2	{'salt_resistance', 'plant_height_reduce'}	3A:10499344-10501395	Triticum aestivum	unknown
TraesCS3A02G033000	2	{'disease_resistance', 'drought_resistance'}	3A:18968536-18973501	Triticum aestivum	unknown
TraesCS3A02G033900	2	{'disease_resistance', 'salt_resistance'}	3A:19313718-19314526	Triticum aestivum	unknown
TraesCS3A02G034000	2	{'disease_resistance', 'salt_resistance'}	3A:19328373-19328828	Triticum aestivum	unknown
TraesCS3A02G037700	2	{'disease_resistance', 'drought_resistance'}	3A:20334714-20337137	Triticum aestivum	unknown
TraesCS3A02G048700	2	{'disease_resistance', 'drought_resistance'}	3A:25932733-25959492	Triticum aestivum	unknown
TraesCS3A02G053300	3	{'disease_resistance', 'salt_resistance', 'drought_resistance'}	3A:30344590-30347556	Triticum aestivum	unknown
TraesCS3A02G095300	2	{'salt_resistance', 'drought_resistance'}	3A:60663849-60667743	Triticum aestivum	unknown
TraesCS3A02G101700	2	{'salt_resistance', 'plant_height_reduce'}	3A:66056962-66059279	Triticum aestivum	unknown
TraesCS3A02G101800	3	{'disease_resistance', 'salt_resistance', 'plant_height_reduce'}	3A:66062348-66064683	Triticum aestivum	unknown
TraesCS3A02G103800	2	{'disease_resistance', 'grain_weight_increase'}	3A:67158231-67165527	Triticum aestivum	unknown
TraesCS3A02G123000	2	{'salt_resistance', 'drought_resistance'}	3A:98840535-98846209	Triticum aestivum	unknown
TraesCS3A02G130000	2	{'salt_resistance', 'drought_resistance'}	3A:107076189-107080320	Triticum aestivum	unknown
TraesCS3A02G132400	2	{'salt_resistance', 'insect_resistance'}	3A:109149213-109153790	Triticum aestivum	unknown
TraesCS3A02G135500	3	{'disease_resistance', 'salt_resistance', 'drought_resistance'}	3A:112957446-112958846	Triticum aestivum	unknown
TraesCS3A02G135700	2	{'disease_resistance', 'salt_resistance'}	3A:113340512-113342609	Triticum aestivum	unknown
TraesCS3A02G154400	2	{'salt_resistance', 'drought_resistance'}	3A:145667222-145668028	Triticum aestivum	unknown
TraesCS3A02G162900	4	{'disease_resistance', 'grain_weight_increase', 'salt_resistance', 'drought_resistance'}	3A:165087589-165088878	Triticum aestivum	unknown
TraesCS3A02G167200	3	{'disease_resistance', 'salt_resistance', 'drought_resistance'}	3A:172963326-172966183	Triticum aestivum	unknown
TraesCS3A02G200900	3	{'disease_resistance', 'salt_resistance', 'drought_resistance'}	3A:333305453-333328967	Triticum aestivum	unknown
TraesCS3A02G208300	3	{'disease_resistance', 'salt_resistance', 'drought_resistance'}	3A:368411113-368414338	Triticum aestivum	unknown
TraesCS3A02G209200	3	{'disease_resistance', 'salt_resistance', 'drought_resistance'}	3A:371624884-371629938	Triticum aestivum	unknown
TraesCS3A02G224900	2	{'disease_resistance', 'salt_resistance'}	3A:421118493-421122535	Triticum aestivum	unknown
TraesCS3A02G231700	3	{'disease_resistance', 'salt_resistance', 'drought_resistance'}	3A:432855223-432868359	Triticum aestivum	unknown
TraesCS3A02G233800	2	{'salt_resistance', 'insect_resistance'}	3A:436466343-436473844	Triticum aestivum	unknown
TraesCS3A02G241700	2	{'disease_resistance', 'drought_resistance'}	3A:453935876-453942834	Triticum aestivum	unknown
TraesCS3A02G249000	3	{'disease_resistance', 'salt_resistance', 'drought_resistance'}	3A:467153054-467156209	Triticum aestivum	unknown
TraesCS3A02G259600	3	{'disease_resistance', 'plant_height_reduce', 'insect_resistance'}	3A:481883442-481887186	Triticum aestivum	unknown
TraesCS3A02G282800	2	{'salt_resistance', 'drought_resistance'}	3A:511074224-511079007	Triticum aestivum	unknown
TraesCS3A02G291400	3	{'disease_resistance', 'salt_resistance', 'drought_resistance'}	3A:521629276-521629836	Triticum aestivum	unknown
TraesCS3A02G294200	2	{'salt_resistance', 'insect_resistance'}	3A:527838390-527841142	Triticum aestivum	unknown
TraesCS3A02G297800	2	{'salt_resistance', 'plant_height_reduce'}	3A:532452789-532454012	Triticum aestivum	unknown
TraesCS3A02G298800	2	{'disease_resistance', 'insect_resistance'}	3A:532934212-532938152	Triticum aestivum	unknown
TraesCS3A02G305900	2	{'salt_resistance', 'drought_resistance'}	3A:542202377-542206577	Triticum aestivum	unknown
TraesCS3A02G315100	2	{'disease_resistance', 'salt_resistance'}	3A:556354721-556361160	Triticum aestivum	unknown
TraesCS3A02G317800	2	{'disease_resistance', 'plant_height_reduce'}	3A:558891382-558893421	Triticum aestivum	unknown
TraesCS3A02G323200	2	{'disease_resistance', 'salt_resistance'}	3A:567975467-567979819	Triticum aestivum	unknown
TraesCS3A02G323400	2	{'disease_resistance', 'salt_resistance'}	3A:568018211-568022230	Triticum aestivum	unknown
TraesCS3A02G323700	2	{'disease_resistance', 'salt_resistance'}	3A:568151330-568162026	Triticum aestivum	unknown
TraesCS3A02G334200	2	{'disease_resistance', 'salt_resistance'}	3A:579552578-579555418	Triticum aestivum	unknown
TraesCS3A02G337200	2	{'salt_resistance', 'drought_resistance'}	3A:584015491-584019577	Triticum aestivum	unknown
TraesCS3A02G346900	3	{'disease_resistance', 'salt_resistance', 'drought_resistance'}	3A:596357028-596359255	Triticum aestivum	unknown
TraesCS3A02G348500	3	{'disease_resistance', 'salt_resistance', 'drought_resistance'}	3A:597233445-597234909	Triticum aestivum	unknown
TraesCS3A02G351300	2	{'disease_resistance', 'salt_resistance'}	3A:599860801-599867349	Triticum aestivum	unknown
TraesCS3A02G357000	2	{'disease_resistance', 'salt_resistance'}	3A:604998850-605001934	Triticum aestivum	unknown
TraesCS3A02G362200	3	{'disease_resistance', 'salt_resistance', 'drought_resistance'}	3A:610366785-610369055	Triticum aestivum	unknown
TraesCS3A02G363000	2	{'disease_resistance', 'salt_resistance'}	3A:611700692-611703172	Triticum aestivum	unknown
TraesCS3A02G381100	2	{'salt_resistance', 'drought_resistance'}	3A:631575444-631579962	Triticum aestivum	unknown
TraesCS3A02G393500	2	{'salt_resistance', 'drought_resistance'}	3A:641403624-641409817	Triticum aestivum	unknown
TraesCS3A02G413000	3	{'disease_resistance', 'salt_resistance', 'drought_resistance'}	3A:656254199-656255608	Triticum aestivum	unknown
TraesCS3A02G413100	3	{'disease_resistance', 'salt_resistance', 'drought_resistance'}	3A:656339217-656339819	Triticum aestivum	unknown
TraesCS3A02G419000	2	{'disease_resistance', 'salt_resistance'}	3A:660855536-660862987	Triticum aestivum	unknown
TraesCS3A02G419100	2	{'disease_resistance', 'salt_resistance'}	3A:660864796-660872768	Triticum aestivum	unknown
TraesCS3A02G420300	2	{'disease_resistance', 'drought_resistance'}	3A:661954022-661959252	Triticum aestivum	unknown
TraesCS3A02G446800	2	{'disease_resistance', 'salt_resistance'}	3A:686863179-686864625	Triticum aestivum	unknown
TraesCS3A02G453200	2	{'salt_resistance', 'drought_resistance'}	3A:691107122-691112178	Triticum aestivum	unknown
TraesCS3A02G519000	2	{'disease_resistance', 'grain_weight_increase'}	3A:736125534-736130451	Triticum aestivum	unknown
TraesCS3A02G522900	2	{'disease_resistance', 'drought_resistance'}	3A:738690614-738694017	Triticum aestivum	unknown
TraesCS3B02G000400	2	{'disease_resistance', 'drought_resistance'}	3B:334498-337790	Triticum aestivum	unknown
TraesCS3B02G022400	2	{'disease_resistance', 'salt_resistance'}	3B:9568439-9573009	Triticum aestivum	unknown
TraesCS3B02G045900	2	{'disease_resistance', 'drought_resistance'}			unknown
TraesCS3B02G048600	2	{'disease_resistance', 'salt_resistance'}	3B:24558920-24559384	Triticum aestivum	unknown
TraesCS3B02G049100	2	{'disease_resistance', 'drought_resistance'}	3B:24911564-24944677	Triticum aestivum	unknown
TraesCS3B02G049900	2	{'disease_resistance', 'salt_resistance'}	3B:25121718-25122173	Triticum aestivum	unknown
TraesCS3B02G053700	2	{'disease_resistance', 'drought_resistance'}	3B:27510777-27519946	Triticum aestivum	unknown
TraesCS3B02G064500	3	{'disease_resistance', 'salt_resistance', 'drought_resistance'}	3B:35873903-35876936	Triticum aestivum	unknown
TraesCS3B02G119200	2	{'salt_resistance', 'plant_height_reduce'}	3B:89063655-89064878	Triticum aestivum	unknown
TraesCS3B02G119300	2	{'salt_resistance', 'plant_height_reduce'}	3B:89093345-89095031	Triticum aestivum	unknown
TraesCS3B02G119500	3	{'disease_resistance', 'salt_resistance', 'plant_height_reduce'}	3B:89352040-89354744	Triticum aestivum	unknown
TraesCS3B02G119600	2	{'salt_resistance', 'plant_height_reduce'}	3B:89356005-89358023	Triticum aestivum	unknown
TraesCS3B02G121200	2	{'disease_resistance', 'grain_weight_increase'}	3B:91436223-91443443	Triticum aestivum	unknown
TraesCS3B02G130000	3	{'disease_resistance', 'salt_resistance', 'drought_resistance'}	3B:112262454-112264866	Triticum aestivum	unknown
TraesCS3B02G142200	2	{'salt_resistance', 'drought_resistance'}	3B:129436119-129441744	Triticum aestivum	unknown
TraesCS3B02G148100	2	{'salt_resistance', 'drought_resistance'}	3B:139409234-139415404	Triticum aestivum	unknown
TraesCS3B02G167100	2	{'salt_resistance', 'insect_resistance'}	3B:167242078-167248176	Triticum aestivum	unknown
TraesCS3B02G169300	3	{'disease_resistance', 'salt_resistance', 'drought_resistance'}	3B:169627115-169630940	Triticum aestivum	unknown
TraesCS3B02G199000	3	{'disease_resistance', 'salt_resistance', 'drought_resistance'}	3B:226787203-226790281	Triticum aestivum	unknown
TraesCS3B02G225800	3	{'disease_resistance', 'salt_resistance', 'drought_resistance'}	3B:312148349-312189729	Triticum aestivum	unknown
TraesCS3B02G235500	3	{'disease_resistance', 'salt_resistance', 'drought_resistance'}	3B:368539168-368546919	Triticum aestivum	unknown
TraesCS3B02G240000	3	{'disease_resistance', 'salt_resistance', 'drought_resistance'}	3B:378686986-378691826	Triticum aestivum	unknown
TraesCS3B02G262400	3	{'grain_weight_increase', 'salt_resistance', 'plant_height_reduce'}	3B:420922117-420923884	Triticum aestivum	unknown
TraesCS3B02G265500	2	{'salt_resistance', 'insect_resistance'}	3B:425376447-425387270	Triticum aestivum	unknown
TraesCS3B02G269900	2	{'disease_resistance', 'drought_resistance'}	3B:434423653-434427389	Triticum aestivum	unknown
TraesCS3B02G275000	2	{'disease_resistance', 'grain_weight_increase'}	3B:443803664-443807278	Triticum aestivum	unknown
TraesCS3B02G277900	3	{'disease_resistance', 'salt_resistance', 'drought_resistance'}	3B:447981062-447984222	Triticum aestivum	unknown
TraesCS3B02G316500	2	{'salt_resistance', 'drought_resistance'}	3B:508251776-508256606	Triticum aestivum	unknown
TraesCS3B02G324500	3	{'disease_resistance', 'salt_resistance', 'drought_resistance'}	3B:525606497-525612405	Triticum aestivum	unknown
TraesCS3B02G326000	3	{'disease_resistance', 'salt_resistance', 'drought_resistance'}	3B:526938538-526939086	Triticum aestivum	unknown
TraesCS3B02G328800	2	{'salt_resistance', 'insect_resistance'}	3B:531210808-531213439	Triticum aestivum	unknown
TraesCS3B02G330600	2	{'salt_resistance', 'drought_resistance'}	3B:534961848-534965788	Triticum aestivum	unknown
TraesCS3B02G348100	2	{'disease_resistance', 'plant_height_reduce'}	3B:557086977-557089327	Triticum aestivum	unknown
TraesCS3B02G352300	2	{'disease_resistance', 'salt_resistance'}	3B:561970511-561974810	Triticum aestivum	unknown
TraesCS3B02G352500	2	{'disease_resistance', 'salt_resistance'}	3B:562272870-562276814	Triticum aestivum	unknown
TraesCS3B02G352700	2	{'disease_resistance', 'salt_resistance'}	3B:562401630-562405038	Triticum aestivum	unknown
TraesCS3B02G352900	2	{'disease_resistance', 'salt_resistance'}	3B:562447620-562454843	Triticum aestivum	unknown
TraesCS3B02G357600	2	{'salt_resistance', 'drought_resistance'}	3B:568282829-568283613	Triticum aestivum	unknown
TraesCS3B02G364400	2	{'salt_resistance', 'plant_height_reduce'}	3B:576020689-576022704	Triticum aestivum	unknown
TraesCS3B02G364500	3	{'disease_resistance', 'salt_resistance', 'plant_height_reduce'}	3B:576049081-576051387	Triticum aestivum	unknown
TraesCS3B02G365200	2	{'disease_resistance', 'salt_resistance'}	3B:576657225-576660207	Triticum aestivum	unknown
TraesCS3B02G368300	2	{'salt_resistance', 'drought_resistance'}	3B:580468739-580472902	Triticum aestivum	unknown
TraesCS3B02G378600	3	{'disease_resistance', 'salt_resistance', 'drought_resistance'}	3B:596852556-596853845	Triticum aestivum	unknown
TraesCS3B02G380300	2	{'salt_resistance', 'drought_resistance'}	3B:597816092-597816980	Triticum aestivum	unknown
TraesCS3B02G380400	3	{'disease_resistance', 'salt_resistance', 'drought_resistance'}	3B:597839807-597841301	Triticum aestivum	unknown
TraesCS3B02G394600	3	{'disease_resistance', 'salt_resistance', 'drought_resistance'}	3B:621936183-621938358	Triticum aestivum	unknown
TraesCS3B02G395400	2	{'disease_resistance', 'salt_resistance'}	3B:623148800-623151091	Triticum aestivum	unknown
TraesCS3B02G404200	2	{'salt_resistance', 'drought_resistance'}	3B:638960471-638962267	Triticum aestivum	unknown
TraesCS3B02G404500	2	{'salt_resistance', 'drought_resistance'}	3B:639553616-639555147	Triticum aestivum	unknown
TraesCS3B02G413800	3	{'disease_resistance', 'salt_resistance', 'drought_resistance'}	3B:650797001-650801750	Triticum aestivum	unknown
TraesCS3B02G425500	2	{'salt_resistance', 'drought_resistance'}	3B:663184013-663190101	Triticum aestivum	unknown
TraesCS3B02G447400	3	{'disease_resistance', 'salt_resistance', 'drought_resistance'}	3B:686492059-686493509	Triticum aestivum	unknown
TraesCS3B02G447500	3	{'disease_resistance', 'salt_resistance', 'drought_resistance'}	3B:686524369-686525851	Triticum aestivum	unknown
TraesCS3B02G454300	2	{'disease_resistance', 'salt_resistance'}	3B:695781303-695787603	Triticum aestivum	unknown
TraesCS3B02G474500	2	{'disease_resistance', 'drought_resistance'}	3B:723463620-723467882	Triticum aestivum	unknown
TraesCS3B02G482200	2	{'disease_resistance', 'salt_resistance'}	3B:729414682-729415980	Triticum aestivum	unknown
TraesCS3B02G490900	2	{'salt_resistance', 'drought_resistance'}	3B:736925140-736931388	Triticum aestivum	unknown
TraesCS3B02G533500	2	{'disease_resistance', 'salt_resistance'}	3B:773757491-773760952	Triticum aestivum	unknown
TraesCS3B02G544300	2	{'salt_resistance', 'drought_resistance'}	3B:781552088-781555666	Triticum aestivum	unknown
TraesCS3B02G544400	2	{'salt_resistance', 'drought_resistance'}	3B:781835471-781843487	Triticum aestivum	unknown
TraesCS3B02G544700	2	{'salt_resistance', 'drought_resistance'}	3B:782111947-782117692	Triticum aestivum	unknown
TraesCS3B02G545300	2	{'salt_resistance', 'drought_resistance'}	3B:782340879-782343873	Triticum aestivum	unknown
TraesCS3B02G565200	3	{'disease_resistance', 'salt_resistance', 'drought_resistance'}	3B:798164253-798167175	Triticum aestivum	unknown
TraesCS3B02G602500	2	{'disease_resistance', 'insect_resistance'}	3B:822547651-822555369	Triticum aestivum	unknown
TraesCS3B02G605700	2	{'disease_resistance', 'insect_resistance'}	3B:824258372-824263876	Triticum aestivum	unknown
TraesCS3D02G010000	2	{'disease_resistance', 'drought_resistance'}	3D:3545473-3550073	Triticum aestivum	unknown
TraesCS3D02G023600	2	{'disease_resistance', 'salt_resistance'}	3D:7496834-7501605	Triticum aestivum	unknown
TraesCS3D02G030600	2	{'disease_resistance', 'drought_resistance'}	3D:11333642-11355705	Triticum aestivum	unknown
TraesCS3D02G041800	2	{'disease_resistance', 'drought_resistance'}	3D:16032112-16034372	Triticum aestivum	unknown
TraesCS3D02G044400	2	{'disease_resistance', 'salt_resistance'}	3D:17152634-17153101	Triticum aestivum	unknown
TraesCS3D02G045200	2	{'disease_resistance', 'drought_resistance'}	3D:17345461-17377766	Triticum aestivum	unknown
TraesCS3D02G045500	2	{'disease_resistance', 'salt_resistance'}	3D:17391349-17392475	Triticum aestivum	unknown
TraesCS3D02G045600	2	{'disease_resistance', 'salt_resistance'}	3D:17406976-17407431	Triticum aestivum	unknown
TraesCS3D02G045700	2	{'disease_resistance', 'salt_resistance'}	3D:17413454-17413909	Triticum aestivum	unknown
TraesCS3D02G045800	2	{'disease_resistance', 'salt_resistance'}	3D:17433235-17433693	Triticum aestivum	unknown
TraesCS3D02G046300	2	{'disease_resistance', 'salt_resistance'}	3D:17556376-17557140	Triticum aestivum	unknown
TraesCS3D02G046800	2	{'disease_resistance', 'salt_resistance'}	3D:17603177-17603632	Triticum aestivum	unknown
TraesCS3D02G048000	2	{'disease_resistance', 'drought_resistance'}	3D:17838560-17843637	Triticum aestivum	unknown
TraesCS3D02G095500	2	{'salt_resistance', 'drought_resistance'}	3D:48442045-48446023	Triticum aestivum	unknown
TraesCS3D02G104000	3	{'disease_resistance', 'salt_resistance', 'plant_height_reduce'}	3D:56684940-56687049	Triticum aestivum	unknown
TraesCS3D02G104100	2	{'salt_resistance', 'plant_height_reduce'}	3D:56708053-56710437	Triticum aestivum	unknown
TraesCS3D02G106100	2	{'disease_resistance', 'grain_weight_increase'}	3D:58120021-58127295	Triticum aestivum	unknown
TraesCS3D02G124700	2	{'salt_resistance', 'drought_resistance'}	3D:82754078-82759970	Triticum aestivum	unknown
TraesCS3D02G129900	2	{'salt_resistance', 'drought_resistance'}	3D:89898040-89904277	Triticum aestivum	unknown
TraesCS3D02G130900	2	{'salt_resistance', 'drought_resistance'}	3D:90824693-90828997	Triticum aestivum	unknown
TraesCS3D02G136700	2	{'disease_resistance', 'salt_resistance'}	3D:95244740-95246725	Triticum aestivum	unknown
TraesCS3D02G151500	3	{'disease_resistance', 'salt_resistance', 'drought_resistance'}	3D:116042453-116043847	Triticum aestivum	unknown
TraesCS3D02G161500	2	{'salt_resistance', 'drought_resistance'}	3D:132274953-132275940	Triticum aestivum	unknown
TraesCS3D02G169000	2	{'disease_resistance', 'drought_resistance'}	3D:144298050-144304734	Triticum aestivum	unknown
TraesCS3D02G170000	4	{'disease_resistance', 'grain_weight_increase', 'salt_resistance', 'drought_resistance'}	3D:148223861-148225435	Triticum aestivum	unknown
TraesCS3D02G173300	3	{'disease_resistance', 'salt_resistance', 'drought_resistance'}	3D:154179353-154182152	Triticum aestivum	unknown
TraesCS3D02G203000	3	{'disease_resistance', 'salt_resistance', 'drought_resistance'}	3D:250914921-250933264	Triticum aestivum	unknown
TraesCS3D02G211300	3	{'disease_resistance', 'salt_resistance', 'drought_resistance'}	3D:282330557-282336664	Triticum aestivum	unknown
TraesCS3D02G212100	3	{'disease_resistance', 'salt_resistance', 'drought_resistance'}	3D:284208466-284213314	Triticum aestivum	unknown
TraesCS3D02G219600	2	{'salt_resistance', 'insect_resistance'}	3D:299590798-299598189	Triticum aestivum	unknown
TraesCS3D02G220100	3	{'grain_weight_increase', 'salt_resistance', 'plant_height_reduce'}	3D:300500316-300503814	Triticum aestivum	unknown
TraesCS3D02G221700	3	{'disease_resistance', 'salt_resistance', 'drought_resistance'}	3D:301965173-301974102	Triticum aestivum	unknown
TraesCS3D02G228700	2	{'disease_resistance', 'salt_resistance'}	3D:310919760-310923812	Triticum aestivum	unknown
TraesCS3D02G241900	2	{'disease_resistance', 'drought_resistance'}	3D:336591339-336598098	Triticum aestivum	unknown
TraesCS3D02G242200	3	{'disease_resistance', 'salt_resistance', 'drought_resistance'}	3D:337303815-337310057	Triticum aestivum	unknown
TraesCS3D02G249000	3	{'disease_resistance', 'salt_resistance', 'drought_resistance'}	3D:348158072-348161269	Triticum aestivum	unknown
TraesCS3D02G282800	2	{'salt_resistance', 'drought_resistance'}	3D:390665442-390670588	Triticum aestivum	unknown
TraesCS3D02G289600	3	{'disease_resistance', 'salt_resistance', 'drought_resistance'}	3D:399653821-399659840	Triticum aestivum	unknown
TraesCS3D02G291100	3	{'disease_resistance', 'salt_resistance', 'drought_resistance'}	3D:401171166-401172261	Triticum aestivum	unknown
TraesCS3D02G294000	2	{'salt_resistance', 'insect_resistance'}	3D:405308430-405312766	Triticum aestivum	unknown
TraesCS3D02G302900	2	{'disease_resistance', 'insect_resistance'}	3D:417737897-417741772	Triticum aestivum	unknown
TraesCS3D02G304400	3	{'disease_resistance', 'salt_resistance', 'plant_height_reduce'}	3D:418718012-418720024	Triticum aestivum	unknown
TraesCS3D02G304500	3	{'disease_resistance', 'salt_resistance', 'plant_height_reduce'}	3D:418722461-418724715	Triticum aestivum	unknown
TraesCS3D02G316400	2	{'disease_resistance', 'salt_resistance'}	3D:429629989-429634118	Triticum aestivum	unknown
TraesCS3D02G316700	2	{'disease_resistance', 'salt_resistance'}	3D:429723986-429728425	Triticum aestivum	unknown
TraesCS3D02G316800	2	{'disease_resistance', 'salt_resistance'}	3D:429786592-429791081	Triticum aestivum	unknown
TraesCS3D02G316900	2	{'disease_resistance', 'salt_resistance'}	3D:429909428-429920435	Triticum aestivum	unknown
TraesCS3D02G317000	2	{'disease_resistance', 'salt_resistance'}	3D:430050266-430053556	Triticum aestivum	unknown
TraesCS3D02G317300	2	{'disease_resistance', 'salt_resistance'}	3D:430150491-430159058	Triticum aestivum	unknown
TraesCS3D02G321500	2	{'salt_resistance', 'drought_resistance'}	3D:434210827-434211962	Triticum aestivum	unknown
TraesCS3D02G327700	2	{'disease_resistance', 'salt_resistance'}	3D:439838218-439841306	Triticum aestivum	unknown
TraesCS3D02G330300	2	{'salt_resistance', 'drought_resistance'}	3D:442811263-442815265	Triticum aestivum	unknown
TraesCS3D02G340500	3	{'disease_resistance', 'salt_resistance', 'drought_resistance'}	3D:454218984-454221087	Triticum aestivum	unknown
TraesCS3D02G342000	2	{'salt_resistance', 'drought_resistance'}	3D:454903995-454904615	Triticum aestivum	unknown
TraesCS3D02G342100	3	{'disease_resistance', 'salt_resistance', 'drought_resistance'}	3D:454979935-454981587	Triticum aestivum	unknown
TraesCS3D02G345500	2	{'disease_resistance', 'salt_resistance'}	3D:457018710-457024515	Triticum aestivum	unknown
TraesCS3D02G355900	3	{'disease_resistance', 'salt_resistance', 'drought_resistance'}	3D:467748833-467750781	Triticum aestivum	unknown
TraesCS3D02G356300	2	{'salt_resistance', 'drought_resistance'}	3D:468758349-468764821	Triticum aestivum	unknown
TraesCS3D02G356700	2	{'disease_resistance', 'salt_resistance'}	3D:469153150-469155455	Triticum aestivum	unknown
TraesCS3D02G374300	2	{'salt_resistance', 'drought_resistance'}	3D:487807055-487811579	Triticum aestivum	unknown
TraesCS3D02G387200	2	{'salt_resistance', 'drought_resistance'}	3D:502049559-502055602	Triticum aestivum	unknown
TraesCS3D02G407600	3	{'disease_resistance', 'salt_resistance', 'drought_resistance'}	3D:520824123-520825587	Triticum aestivum	unknown
TraesCS3D02G407700	3	{'disease_resistance', 'salt_resistance', 'drought_resistance'}	3D:520862627-520864131	Triticum aestivum	unknown
TraesCS3D02G414600	2	{'disease_resistance', 'salt_resistance'}	3D:526459481-526474330	Triticum aestivum	unknown
TraesCS3D02G433100	2	{'disease_resistance', 'drought_resistance'}	3D:546385369-546389635	Triticum aestivum	unknown
TraesCS3D02G439400	2	{'disease_resistance', 'salt_resistance'}	3D:549704928-549706386	Triticum aestivum	unknown
TraesCS3D02G481200	2	{'disease_resistance', 'salt_resistance'}	3D:579420297-579424088	Triticum aestivum	unknown
TraesCS3D02G491900	2	{'salt_resistance', 'drought_resistance'}	3D:585709691-585715328	Triticum aestivum	unknown
TraesCS3D02G526400	2	{'disease_resistance', 'grain_weight_increase'}	3D:605156756-605161383	Triticum aestivum	unknown
TraesCS4A02G001400	2	{'disease_resistance', 'drought_resistance'}	4A:1076557-1076952	Triticum aestivum	unknown
TraesCS4A02G005600	3	{'disease_resistance', 'salt_resistance', 'drought_resistance'}	4A:3370312-3371892	Triticum aestivum	unknown
TraesCS4A02G013600	2	{'salt_resistance', 'drought_resistance'}	4A:7749033-7749995	Triticum aestivum	unknown
TraesCS4A02G028200	2	{'disease_resistance', 'plant_height_reduce'}	4A:19991318-20006652	Triticum aestivum	unknown
TraesCS4A02G051100	2	{'salt_resistance', 'drought_resistance'}	4A:41968227-41975188	Triticum aestivum	unknown
TraesCS4A02G059200	2	{'disease_resistance', 'drought_resistance'}	4A:55377186-55380060	Triticum aestivum	unknown
TraesCS4A02G078000	2	{'disease_resistance', 'grain_weight_increase'}	4A:77439580-77445885	Triticum aestivum	unknown
TraesCS4A02G092200	2	{'disease_resistance', 'salt_resistance'}	4A:99005047-99005520	Triticum aestivum	unknown
TraesCS4A02G092600	2	{'disease_resistance', 'salt_resistance'}	4A:99913459-99914822	Triticum aestivum	unknown
TraesCS4A02G092800	2	{'disease_resistance', 'salt_resistance'}	4A:100187764-100188240	Triticum aestivum	unknown
TraesCS4A02G094000	2	{'disease_resistance', 'salt_resistance'}	4A:101756944-101759389	Triticum aestivum	unknown
TraesCS4A02G108700	2	{'salt_resistance', 'drought_resistance'}	4A:127282109-127289564	Triticum aestivum	unknown
TraesCS4A02G108800	2	{'salt_resistance', 'drought_resistance'}	4A:127481061-127489170	Triticum aestivum	unknown
TraesCS4A02G117500	2	{'disease_resistance', 'drought_resistance'}	4A:143433679-143436443	Triticum aestivum	unknown
TraesCS4A02G126800	3	{'disease_resistance', 'salt_resistance', 'drought_resistance'}	4A:163825377-163830254	Triticum aestivum	unknown
TraesCS4A02G129400	2	{'disease_resistance', 'salt_resistance'}	4A:168792099-168794054	Triticum aestivum	unknown
TraesCS4A02G130600	4	{'disease_resistance', 'grain_weight_increase', 'salt_resistance', 'drought_resistance'}	4A:173630224-173632115	Triticum aestivum	unknown
TraesCS4A02G136500	3	{'disease_resistance', 'salt_resistance', 'drought_resistance'}	4A:191118052-191121423	Triticum aestivum	unknown
TraesCS4A02G151200	2	{'grain_weight_increase', 'plant_height_reduce'}	4A:302677608-302681173	Triticum aestivum	unknown
TraesCS4A02G171500	2	{'disease_resistance', 'drought_resistance'}	4A:434726959-434734133	Triticum aestivum	unknown
TraesCS4A02G178700	2	{'salt_resistance', 'drought_resistance'}	4A:451594295-451595239	Triticum aestivum	unknown
TraesCS4A02G179800	2	{'disease_resistance', 'drought_resistance'}	4A:453604904-453611778	Triticum aestivum	unknown
TraesCS4A02G200000	3	{'disease_resistance', 'salt_resistance', 'drought_resistance'}	4A:488110425-488112320	Triticum aestivum	unknown
TraesCS4A02G202200	2	{'disease_resistance', 'salt_resistance'}	4A:491914927-491917719	Triticum aestivum	unknown
TraesCS4A02G206200	2	{'disease_resistance', 'salt_resistance'}	4A:499341057-499345357	Triticum aestivum	unknown
TraesCS4A02G213200	2	{'salt_resistance', 'drought_resistance'}	4A:511187957-511189477	Triticum aestivum	unknown
TraesCS4A02G218400	2	{'disease_resistance', 'drought_resistance'}	4A:520125033-520128361	Triticum aestivum	unknown
TraesCS4A02G226700	2	{'disease_resistance', 'salt_resistance'}	4A:534811309-534812765	Triticum aestivum	unknown
TraesCS4A02G227600	2	{'salt_resistance', 'drought_resistance'}	4A:535856321-535874255	Triticum aestivum	unknown
TraesCS4A02G238600	3	{'disease_resistance', 'salt_resistance', 'drought_resistance'}	4A:547978725-547980380	Triticum aestivum	unknown
TraesCS4A02G242700	5	{'grain_weight_increase', 'disease_resistance', 'drought_resistance', 'plant_height_reduce', 'salt_resistance'}	4A:552698424-552700420	Triticum aestivum	unknown
TraesCS4A02G245500	3	{'disease_resistance', 'salt_resistance', 'drought_resistance'}	4A:555745788-555750654	Triticum aestivum	unknown
TraesCS4A02G255000	3	{'disease_resistance', 'grain_weight_increase', 'plant_height_reduce'}	4A:567181384-567185511	Triticum aestivum	unknown
TraesCS4A02G260600	2	{'salt_resistance', 'drought_resistance'}	4A:573170755-573173878	Triticum aestivum	unknown
TraesCS4A02G273800	3	{'disease_resistance', 'salt_resistance', 'drought_resistance'}	4A:584108425-584112758	Triticum aestivum	unknown
TraesCS4A02G274000	3	{'disease_resistance', 'salt_resistance', 'drought_resistance'}	4A:584114748-584115922	Triticum aestivum	unknown
TraesCS4A02G274100	3	{'disease_resistance', 'salt_resistance', 'drought_resistance'}	4A:584117906-584119065	Triticum aestivum	unknown
TraesCS4A02G282000	2	{'disease_resistance', 'salt_resistance'}	4A:589787451-589791613	Triticum aestivum	unknown
TraesCS4A02G282300	2	{'disease_resistance', 'salt_resistance'}	4A:589842571-589846770	Triticum aestivum	unknown
TraesCS4A02G283400	2	{'disease_resistance', 'salt_resistance'}	4A:590277244-590280756	Triticum aestivum	unknown
TraesCS4A02G291500	3	{'disease_resistance', 'grain_weight_increase', 'plant_height_reduce'}	4A:594532829-594535533	Triticum aestivum	unknown
TraesCS4A02G309300	3	{'disease_resistance', 'salt_resistance', 'drought_resistance'}	4A:602797611-602798738	Triticum aestivum	unknown
TraesCS4A02G314600	2	{'disease_resistance', 'drought_resistance'}	4A:604940912-604941475	Triticum aestivum	unknown
TraesCS4A02G336800	3	{'disease_resistance', 'salt_resistance', 'drought_resistance'}	4A:619182837-619188858	Triticum aestivum	unknown
TraesCS4A02G347800	2	{'salt_resistance', 'drought_resistance'}	4A:625531179-625534896	Triticum aestivum	unknown
TraesCS4A02G349800	2	{'salt_resistance', 'insect_resistance'}	4A:626307387-626329052	Triticum aestivum	unknown
TraesCS4A02G350200	2	{'disease_resistance', 'drought_resistance'}	4A:626439275-626443664	Triticum aestivum	unknown
TraesCS4A02G355000	3	{'disease_resistance', 'salt_resistance', 'drought_resistance'}	4A:629360131-629365980	Triticum aestivum	unknown
TraesCS4A02G359800	2	{'disease_resistance', 'insect_resistance'}	4A:632943907-632949856	Triticum aestivum	unknown
TraesCS4A02G384500	3	{'disease_resistance', 'salt_resistance', 'plant_height_reduce'}	4A:662147700-662149730	Triticum aestivum	unknown
TraesCS4A02G384600	2	{'salt_resistance', 'plant_height_reduce'}	4A:662200133-662202556	Triticum aestivum	unknown
TraesCS4A02G396300	3	{'disease_resistance', 'salt_resistance', 'drought_resistance'}	4A:671596941-671602491	Triticum aestivum	unknown
TraesCS4A02G396400	3	{'disease_resistance', 'salt_resistance', 'drought_resistance'}	4A:671639168-671643875	Triticum aestivum	unknown
TraesCS4A02G396700	3	{'disease_resistance', 'salt_resistance', 'drought_resistance'}	4A:671924018-671926050	Triticum aestivum	unknown
TraesCS4A02G401100	2	{'disease_resistance', 'salt_resistance'}	4A:675131549-675135314	Triticum aestivum	unknown
TraesCS4A02G406100	2	{'disease_resistance', 'salt_resistance'}	4A:679075783-679079927	Triticum aestivum	unknown
TraesCS4A02G406200	2	{'disease_resistance', 'salt_resistance'}	4A:679084499-679086808	Triticum aestivum	unknown
TraesCS4A02G414600	3	{'disease_resistance', 'salt_resistance', 'drought_resistance'}	4A:684908016-684922468	Triticum aestivum	unknown
TraesCS4A02G416000	3	{'disease_resistance', 'salt_resistance', 'drought_resistance'}	4A:685826784-685827155	Triticum aestivum	unknown
TraesCS4A02G434900	3	{'disease_resistance', 'grain_weight_increase', 'plant_height_reduce'}	4A:705509912-705513259	Triticum aestivum	unknown
TraesCS4A02G435000	2	{'disease_resistance', 'salt_resistance'}	4A:705517183-705521196	Triticum aestivum	unknown
TraesCS4A02G443400	3	{'disease_resistance', 'salt_resistance', 'drought_resistance'}	4A:711956840-711962428	Triticum aestivum	unknown
TraesCS4A02G443500	3	{'disease_resistance', 'salt_resistance', 'drought_resistance'}	4A:711973703-711979247	Triticum aestivum	unknown
TraesCS4A02G455900	3	{'disease_resistance', 'salt_resistance', 'drought_resistance'}	4A:719178222-719179736	Triticum aestivum	unknown
TraesCS4A02G456300	3	{'disease_resistance', 'salt_resistance', 'drought_resistance'}	4A:721380650-721386377	Triticum aestivum	unknown
TraesCS4A02G466700	3	{'grain_weight_increase', 'salt_resistance', 'plant_height_reduce'}	4A:729476085-729477069	Triticum aestivum	unknown
TraesCS4A02G470500	2	{'disease_resistance', 'insect_resistance'}	4A:731397493-731400686	Triticum aestivum	unknown
TraesCS4B02G001900	2	{'disease_resistance', 'drought_resistance'}	4B:1080301-1080693	Triticum aestivum	unknown
TraesCS4B02G018900	2	{'disease_resistance', 'insect_resistance'}	4B:13944552-13947600	Triticum aestivum	unknown
TraesCS4B02G030100	2	{'disease_resistance', 'salt_resistance'}	4B:22272751-22276844	Triticum aestivum	unknown
TraesCS4B02G031100	2	{'disease_resistance', 'salt_resistance'}	4B:23354227-23358360	Triticum aestivum	unknown
TraesCS4B02G037100	2	{'disease_resistance', 'salt_resistance'}	4B:26796479-26800258	Triticum aestivum	unknown
TraesCS4B02G039600	3	{'disease_resistance', 'salt_resistance', 'drought_resistance'}	4B:28157823-28158988	Triticum aestivum	unknown
TraesCS4B02G039700	3	{'disease_resistance', 'salt_resistance', 'drought_resistance'}	4B:28174640-28175745	Triticum aestivum	unknown
TraesCS4B02G039800	3	{'disease_resistance', 'salt_resistance', 'drought_resistance'}	4B:28179798-28182771	Triticum aestivum	unknown
TraesCS4B02G039900	3	{'disease_resistance', 'salt_resistance', 'drought_resistance'}	4B:28185747-28186852	Triticum aestivum	unknown
TraesCS4B02G040000	3	{'disease_resistance', 'salt_resistance', 'drought_resistance'}	4B:28189828-28191004	Triticum aestivum	unknown
TraesCS4B02G048500	2	{'salt_resistance', 'drought_resistance'}	4B:36762020-36763524	Triticum aestivum	unknown
TraesCS4B02G054000	2	{'salt_resistance', 'drought_resistance'}	4B:42775025-42777218	Triticum aestivum	unknown
TraesCS4B02G060000	3	{'disease_resistance', 'grain_weight_increase', 'plant_height_reduce'}	4B:51679625-51683720	Triticum aestivum	unknown
TraesCS4B02G069900	3	{'disease_resistance', 'salt_resistance', 'drought_resistance'}	4B:63994114-63998592	Triticum aestivum	unknown
TraesCS4B02G072400	5	{'grain_weight_increase', 'disease_resistance', 'drought_resistance', 'plant_height_reduce', 'salt_resistance'}	4B:67771306-67773203	Triticum aestivum	unknown
TraesCS4B02G076200	3	{'disease_resistance', 'salt_resistance', 'drought_resistance'}	4B:72901050-72902701	Triticum aestivum	unknown
TraesCS4B02G079300	3	{'disease_resistance', 'salt_resistance', 'drought_resistance'}	4B:76816569-76819507	Triticum aestivum	unknown
TraesCS4B02G088500	2	{'salt_resistance', 'drought_resistance'}	4B:89388316-89406080	Triticum aestivum	unknown
TraesCS4B02G097200	2	{'disease_resistance', 'drought_resistance'}	4B:101774880-101779259	Triticum aestivum	unknown
TraesCS4B02G102600	2	{'salt_resistance', 'drought_resistance'}	4B:108669975-108671813	Triticum aestivum	unknown
TraesCS4B02G106300	2	{'disease_resistance', 'salt_resistance'}	4B:115556136-115560148	Triticum aestivum	unknown
TraesCS4B02G106500	2	{'disease_resistance', 'salt_resistance'}	4B:115879177-115881956	Triticum aestivum	unknown
TraesCS4B02G109800	2	{'disease_resistance', 'salt_resistance'}	4B:122519855-122524340	Triticum aestivum	unknown
TraesCS4B02G115400	3	{'disease_resistance', 'salt_resistance', 'drought_resistance'}	4B:132166215-132167951	Triticum aestivum	unknown
TraesCS4B02G127400	2	{'disease_resistance', 'drought_resistance'}	4B:166759852-166766993	Triticum aestivum	unknown
TraesCS4B02G131000	3	{'disease_resistance', 'salt_resistance', 'drought_resistance'}	4B:171608536-171613538	Triticum aestivum	unknown
TraesCS4B02G138900	2	{'salt_resistance', 'drought_resistance'}	4B:183001729-183003168	Triticum aestivum	unknown
TraesCS4B02G139900	2	{'disease_resistance', 'drought_resistance'}	4B:184233233-184240536	Triticum aestivum	unknown
TraesCS4B02G178100	3	{'disease_resistance', 'salt_resistance', 'drought_resistance'}	4B:389464002-389467714	Triticum aestivum	unknown
TraesCS4B02G179000	2	{'salt_resistance', 'drought_resistance'}	4B:392044109-392048031	Triticum aestivum	unknown
TraesCS4B02G195900	2	{'salt_resistance', 'drought_resistance'}	4B:422030176-422034573	Triticum aestivum	unknown
TraesCS4B02G210100	3	{'disease_resistance', 'salt_resistance', 'drought_resistance'}	4B:448801678-448803545	Triticum aestivum	unknown
TraesCS4B02G210300	2	{'disease_resistance', 'salt_resistance'}	4B:449014009-449016482	Triticum aestivum	unknown
TraesCS4B02G211600	2	{'disease_resistance', 'salt_resistance'}	4B:449928263-449929059	Triticum aestivum	unknown
TraesCS4B02G212200	2	{'disease_resistance', 'salt_resistance'}	4B:450482385-450483485	Triticum aestivum	unknown
TraesCS4B02G234600	2	{'disease_resistance', 'plant_height_reduce'}	4B:489087478-489090964	Triticum aestivum	unknown
TraesCS4B02G234800	2	{'disease_resistance', 'drought_resistance'}	4B:489647704-489650582	Triticum aestivum	unknown
TraesCS4B02G245700	2	{'disease_resistance', 'plant_height_reduce'}	4B:507964552-507979743	Triticum aestivum	unknown
TraesCS4B02G253200	2	{'salt_resistance', 'drought_resistance'}	4B:519044467-519051764	Triticum aestivum	unknown
TraesCS4B02G276200	2	{'disease_resistance', 'drought_resistance'}	4B:555924912-555933657	Triticum aestivum	unknown
TraesCS4B02G277800	2	{'disease_resistance', 'plant_height_reduce'}	4B:559647873-559661486	Triticum aestivum	unknown
TraesCS4B02G289100	2	{'salt_resistance', 'plant_height_reduce'}	4B:574169282-574171714	Triticum aestivum	unknown
TraesCS4B02G290100	2	{'salt_resistance', 'drought_resistance'}	4B:574948889-574949836	Triticum aestivum	unknown
TraesCS4B02G299500	3	{'disease_resistance', 'salt_resistance', 'drought_resistance'}	4B:585962983-585964402	Triticum aestivum	unknown
TraesCS4B02G305600	2	{'disease_resistance', 'salt_resistance'}	4B:594359019-594363636	Triticum aestivum	unknown
TraesCS4B02G305700	2	{'disease_resistance', 'salt_resistance'}	4B:594436500-594438842	Triticum aestivum	unknown
TraesCS4B02G315300	3	{'disease_resistance', 'salt_resistance', 'drought_resistance'}	4B:604681934-604696971	Triticum aestivum	unknown
TraesCS4B02G316800	3	{'disease_resistance', 'salt_resistance', 'drought_resistance'}	4B:606755147-606755515	Triticum aestivum	unknown
TraesCS4B02G319900	3	{'disease_resistance', 'salt_resistance', 'drought_resistance'}	4B:611018334-611022561	Triticum aestivum	unknown
TraesCS4B02G332500	2	{'disease_resistance', 'drought_resistance'}	4B:623061194-623063414	Triticum aestivum	unknown
TraesCS4B02G342800	2	{'grain_weight_increase', 'plant_height_reduce'}	4B:636737253-636738575	Triticum aestivum	unknown
TraesCS4B02G350600	2	{'salt_resistance', 'drought_resistance'}	4B:643308752-643313301	Triticum aestivum	unknown
TraesCS4B02G352300	2	{'salt_resistance', 'drought_resistance'}	4B:644371862-644375809	Triticum aestivum	unknown
TraesCS4B02G356100	2	{'salt_resistance', 'drought_resistance'}	4B:646862708-646864601	Triticum aestivum	unknown
TraesCS4B02G375300	2	{'disease_resistance', 'salt_resistance'}	4B:659481853-659485452	Triticum aestivum	unknown
TraesCS4B02G375400	2	{'disease_resistance', 'salt_resistance'}	4B:659497468-659501087	Triticum aestivum	unknown
TraesCS4B02G377600	2	{'salt_resistance', 'drought_resistance'}	4B:660352578-660356106	Triticum aestivum	unknown
TraesCS4B02G379200	3	{'disease_resistance', 'salt_resistance', 'drought_resistance'}	4B:660572882-660581373	Triticum aestivum	unknown
TraesCS4B02G396300	2	{'disease_resistance', 'salt_resistance'}	4B:670796650-670799185	Triticum aestivum	unknown
TraesCS4D02G001200	2	{'disease_resistance', 'drought_resistance'}	4D:738967-739353	Triticum aestivum	unknown
TraesCS4D02G002400	2	{'salt_resistance', 'drought_resistance'}	4D:1288444-1290808	Triticum aestivum	unknown
TraesCS4D02G020300	3	{'disease_resistance', 'grain_weight_increase', 'plant_height_reduce'}	4D:8777205-8779937	Triticum aestivum	unknown
TraesCS4D02G028700	2	{'disease_resistance', 'salt_resistance'}	4D:12658333-12662124	Triticum aestivum	unknown
TraesCS4D02G035100	2	{'disease_resistance', 'insect_resistance'}	4D:15871106-15877068	Triticum aestivum	unknown
TraesCS4D02G035200	2	{'disease_resistance', 'insect_resistance'}	4D:15911931-15916180	Triticum aestivum	unknown
TraesCS4D02G036600	3	{'disease_resistance', 'salt_resistance', 'drought_resistance'}	4D:16252285-16253234	Triticum aestivum	unknown
TraesCS4D02G036700	3	{'disease_resistance', 'salt_resistance', 'drought_resistance'}	4D:16256840-16261317	Triticum aestivum	unknown
TraesCS4D02G036900	3	{'disease_resistance', 'salt_resistance', 'drought_resistance'}	4D:16264532-16265637	Triticum aestivum	unknown
TraesCS4D02G037000	3	{'disease_resistance', 'salt_resistance', 'drought_resistance'}	4D:16301263-16302368	Triticum aestivum	unknown
TraesCS4D02G037100	3	{'disease_resistance', 'salt_resistance', 'drought_resistance'}	4D:16305621-16306726	Triticum aestivum	unknown
TraesCS4D02G037200	3	{'disease_resistance', 'salt_resistance', 'drought_resistance'}	4D:16326502-16327607	Triticum aestivum	unknown
TraesCS4D02G037300	3	{'disease_resistance', 'salt_resistance', 'drought_resistance'}	4D:16331015-16332120	Triticum aestivum	unknown
TraesCS4D02G037400	3	{'disease_resistance', 'salt_resistance', 'drought_resistance'}	4D:16334772-16335870	Triticum aestivum	unknown
TraesCS4D02G037500	3	{'disease_resistance', 'salt_resistance', 'drought_resistance'}	4D:16345904-16347009	Triticum aestivum	unknown
TraesCS4D02G054000	2	{'salt_resistance', 'drought_resistance'}	4D:30004272-30006374	Triticum aestivum	unknown
TraesCS4D02G059600	3	{'disease_resistance', 'grain_weight_increase', 'plant_height_reduce'}	4D:35476875-35481038	Triticum aestivum	unknown
TraesCS4D02G068700	3	{'disease_resistance', 'salt_resistance', 'drought_resistance'}	4D:44200785-44205826	Triticum aestivum	unknown
TraesCS4D02G071200	5	{'grain_weight_increase', 'disease_resistance', 'drought_resistance', 'plant_height_reduce', 'salt_resistance'}	4D:46290974-46293134	Triticum aestivum	unknown
TraesCS4D02G074800	3	{'disease_resistance', 'salt_resistance', 'drought_resistance'}	4D:49367090-49370017	Triticum aestivum	unknown
TraesCS4D02G078100	3	{'disease_resistance', 'salt_resistance', 'drought_resistance'}	4D:52470433-52473315	Triticum aestivum	unknown
TraesCS4D02G085800	2	{'salt_resistance', 'drought_resistance'}	4D:61128713-61149270	Triticum aestivum	unknown
TraesCS4D02G093600	2	{'disease_resistance', 'drought_resistance'}	4D:69126886-69130154	Triticum aestivum	unknown
TraesCS4D02G100000	2	{'salt_resistance', 'drought_resistance'}	4D:77120156-77121980	Triticum aestivum	unknown
TraesCS4D02G103000	2	{'disease_resistance', 'salt_resistance'}	4D:81918232-81921969	Triticum aestivum	unknown
TraesCS4D02G103100	2	{'disease_resistance', 'salt_resistance'}	4D:81971499-81974375	Triticum aestivum	unknown
TraesCS4D02G103300	2	{'disease_resistance', 'salt_resistance'}	4D:81984987-81987448	Triticum aestivum	unknown
TraesCS4D02G113100	3	{'disease_resistance', 'salt_resistance', 'drought_resistance'}	4D:93710051-93711864	Triticum aestivum	unknown
TraesCS4D02G126200	3	{'disease_resistance', 'salt_resistance', 'drought_resistance'}	4D:110111694-110117091	Triticum aestivum	unknown
TraesCS4D02G133600	2	{'salt_resistance', 'drought_resistance'}	4D:120071370-120072314	Triticum aestivum	unknown
TraesCS4D02G134600	2	{'disease_resistance', 'drought_resistance'}	4D:121432471-121439689	Triticum aestivum	unknown
TraesCS4D02G162400	3	{'disease_resistance', 'salt_resistance', 'drought_resistance'}	4D:247514372-247523816	Triticum aestivum	unknown
TraesCS4D02G170700	3	{'disease_resistance', 'salt_resistance', 'drought_resistance'}	4D:297205283-297220047	Triticum aestivum	unknown
TraesCS4D02G176000	4	{'disease_resistance', 'grain_weight_increase', 'salt_resistance', 'drought_resistance'}	4D:305140842-305142727	Triticum aestivum	unknown
TraesCS4D02G179700	3	{'disease_resistance', 'salt_resistance', 'drought_resistance'}	4D:312791129-312796052	Triticum aestivum	unknown
TraesCS4D02G188200	2	{'disease_resistance', 'drought_resistance'}	4D:327437080-327439925	Triticum aestivum	unknown
TraesCS4D02G212200	2	{'disease_resistance', 'salt_resistance'}	4D:365187784-365188636	Triticum aestivum	unknown
TraesCS4D02G212300	2	{'disease_resistance', 'salt_resistance'}	4D:365217429-365218296	Triticum aestivum	unknown
TraesCS4D02G212400	2	{'disease_resistance', 'salt_resistance'}	4D:365398791-365399544	Triticum aestivum	unknown
TraesCS4D02G213100	2	{'disease_resistance', 'salt_resistance'}	4D:365864286-365865248	Triticum aestivum	unknown
TraesCS4D02G213300	2	{'disease_resistance', 'salt_resistance'}	4D:366219163-366219636	Triticum aestivum	unknown
TraesCS4D02G236000	2	{'disease_resistance', 'drought_resistance'}	4D:397666022-397668905	Triticum aestivum	unknown
TraesCS4D02G243700	2	{'disease_resistance', 'plant_height_reduce'}	4D:407116047-407128637	Triticum aestivum	unknown
TraesCS4D02G245200	2	{'disease_resistance', 'plant_height_reduce'}	4D:410402571-410413185	Triticum aestivum	unknown
TraesCS4D02G253300	2	{'salt_resistance', 'drought_resistance'}	4D:422079797-422085622	Triticum aestivum	unknown
TraesCS4D02G274400	2	{'disease_resistance', 'drought_resistance'}	4D:444523318-444531605	Triticum aestivum	unknown
TraesCS4D02G276100	2	{'disease_resistance', 'plant_height_reduce'}	4D:447283386-447293084	Triticum aestivum	unknown
TraesCS4D02G288200	2	{'salt_resistance', 'plant_height_reduce'}	4D:459383276-459385727	Triticum aestivum	unknown
TraesCS4D02G289200	2	{'salt_resistance', 'drought_resistance'}	4D:460479727-460480686	Triticum aestivum	unknown
TraesCS4D02G298400	3	{'disease_resistance', 'salt_resistance', 'drought_resistance'}	4D:467635163-467636763	Triticum aestivum	unknown
TraesCS4D02G303800	2	{'disease_resistance', 'salt_resistance'}	4D:472165969-472169733	Triticum aestivum	unknown
TraesCS4D02G303900	2	{'disease_resistance', 'salt_resistance'}	4D:472207858-472210282	Triticum aestivum	unknown
TraesCS4D02G316500	3	{'disease_resistance', 'salt_resistance', 'drought_resistance'}	4D:481614587-481618842	Triticum aestivum	unknown
TraesCS4D02G329200	2	{'disease_resistance', 'drought_resistance'}	4D:487459290-487461169	Triticum aestivum	unknown
TraesCS4D02G338800	2	{'grain_weight_increase', 'plant_height_reduce'}	4D:496695600-496697302	Triticum aestivum	unknown
TraesCS4D02G345300	2	{'salt_resistance', 'drought_resistance'}	4D:500021394-500025891	Triticum aestivum	unknown
TraesCS4D02G346700	2	{'salt_resistance', 'drought_resistance'}	4D:500497777-500501907	Triticum aestivum	unknown
TraesCS4D02G347600	3	{'disease_resistance', 'salt_resistance', 'drought_resistance'}	4D:501320196-501325645	Triticum aestivum	unknown
TraesCS4D02G349500	2	{'salt_resistance', 'drought_resistance'}	4D:502488484-502490376	Triticum aestivum	unknown
TraesCS4D02G361600	2	{'disease_resistance', 'salt_resistance'}	4D:508339521-508343262	Triticum aestivum	unknown
TraesCS5A02G001500	3	{'disease_resistance', 'salt_resistance', 'drought_resistance'}	5A:1218671-1227119	Triticum aestivum	unknown
TraesCS5A02G002400	3	{'disease_resistance', 'salt_resistance', 'drought_resistance'}	5A:2081880-2086130	Triticum aestivum	unknown
TraesCS5A02G020900	2	{'disease_resistance', 'salt_resistance'}	5A:17221404-17224338	Triticum aestivum	unknown
TraesCS5A02G057400	2	{'disease_resistance', 'salt_resistance'}	5A:55018462-55019763	Triticum aestivum	unknown
TraesCS5A02G062600	2	{'disease_resistance', 'drought_resistance'}	5A:67470715-67478242	Triticum aestivum	unknown
TraesCS5A02G069500	3	{'disease_resistance', 'salt_resistance', 'drought_resistance'}	5A:78157536-78160032	Triticum aestivum	unknown
TraesCS5A02G081600	2	{'salt_resistance', 'plant_height_reduce'}	5A:105415268-105417355	Triticum aestivum	unknown
TraesCS5A02G090500	3	{'disease_resistance', 'salt_resistance', 'drought_resistance'}	5A:122953651-122958048	Triticum aestivum	unknown
TraesCS5A02G101900	2	{'disease_resistance', 'salt_resistance'}	5A:151252130-151259019	Triticum aestivum	unknown
TraesCS5A02G112600	2	{'salt_resistance', 'drought_resistance'}	5A:219694819-219696861	Triticum aestivum	unknown
TraesCS5A02G117500	2	{'disease_resistance', 'plant_height_reduce'}	5A:239118833-239124161	Triticum aestivum	unknown
TraesCS5A02G118200	2	{'disease_resistance', 'salt_resistance'}	5A:242531195-242538426	Triticum aestivum	unknown
TraesCS5A02G131400	2	{'disease_resistance', 'grain_weight_increase'}	5A:296195539-296198763	Triticum aestivum	unknown
TraesCS5A02G138300	2	{'disease_resistance', 'salt_resistance'}	5A:310872706-310875109	Triticum aestivum	unknown
TraesCS5A02G138700	3	{'disease_resistance', 'salt_resistance', 'drought_resistance'}	5A:311000641-311002500	Triticum aestivum	unknown
TraesCS5A02G143100	2	{'grain_weight_increase', 'plant_height_reduce'}	5A:317238719-317240462	Triticum aestivum	unknown
TraesCS5A02G148000	3	{'disease_resistance', 'salt_resistance', 'drought_resistance'}	5A:325930589-325933350	Triticum aestivum	unknown
TraesCS5A02G161200	2	{'grain_weight_increase', 'salt_resistance'}	5A:343061789-343069735	Triticum aestivum	unknown
TraesCS5A02G202000	2	{'salt_resistance', 'drought_resistance'}	5A:408837931-408843158	Triticum aestivum	unknown
TraesCS5A02G210100	2	{'salt_resistance', 'drought_resistance'}	5A:423251028-423255078	Triticum aestivum	unknown
TraesCS5A02G220200	2	{'salt_resistance', 'drought_resistance'}	5A:436888202-436892483	Triticum aestivum	unknown
TraesCS5A02G222500	3	{'disease_resistance', 'salt_resistance', 'drought_resistance'}	5A:438471500-438475911	Triticum aestivum	unknown
TraesCS5A02G223500	2	{'salt_resistance', 'drought_resistance'}	5A:439374415-439377837	Triticum aestivum	unknown
TraesCS5A02G225200	3	{'disease_resistance', 'salt_resistance', 'drought_resistance'}	5A:440733730-440735070	Triticum aestivum	unknown
TraesCS5A02G238000	2	{'salt_resistance', 'drought_resistance'}	5A:454434541-454437584	Triticum aestivum	unknown
TraesCS5A02G260600	2	{'disease_resistance', 'salt_resistance'}	5A:474541233-474545032	Triticum aestivum	unknown
TraesCS5A02G275900	5	{'grain_weight_increase', 'disease_resistance', 'drought_resistance', 'plant_height_reduce', 'salt_resistance'}	5A:485204794-485207465	Triticum aestivum	unknown
TraesCS5A02G295000	2	{'salt_resistance', 'drought_resistance'}	5A:503667634-503669320	Triticum aestivum	unknown
TraesCS5A02G298500	2	{'disease_resistance', 'salt_resistance'}	5A:505609485-505613419	Triticum aestivum	unknown
TraesCS5A02G312200	2	{'disease_resistance', 'drought_resistance'}	5A:523815412-523817450	Triticum aestivum	unknown
TraesCS5A02G323900	2	{'disease_resistance', 'drought_resistance'}	5A:535528236-535531477	Triticum aestivum	unknown
TraesCS5A02G337100	2	{'salt_resistance', 'drought_resistance'}	5A:545632497-545639654	Triticum aestivum	unknown
TraesCS5A02G350800	2	{'disease_resistance', 'salt_resistance'}	5A:553457987-553465185	Triticum aestivum	unknown
TraesCS5A02G351000	2	{'disease_resistance', 'salt_resistance'}	5A:553490210-553499037	Triticum aestivum	unknown
TraesCS5A02G351600	2	{'disease_resistance', 'salt_resistance'}	5A:554187766-554191913	Triticum aestivum	unknown
TraesCS5A02G352000	2	{'disease_resistance', 'salt_resistance'}	5A:554234499-554238433	Triticum aestivum	unknown
TraesCS5A02G353500	2	{'salt_resistance', 'drought_resistance'}	5A:556529046-556531643	Triticum aestivum	unknown
TraesCS5A02G356300	2	{'disease_resistance', 'salt_resistance'}	5A:558682954-558688761	Triticum aestivum	unknown
TraesCS5A02G375000	2	{'disease_resistance', 'salt_resistance'}	5A:573039922-573045194	Triticum aestivum	unknown
TraesCS5A02G377900	2	{'disease_resistance', 'salt_resistance'}	5A:575594327-575595945	Triticum aestivum	unknown
TraesCS5A02G378800	2	{'disease_resistance', 'insect_resistance'}	5A:575900999-575904358	Triticum aestivum	unknown
TraesCS5A02G379000	2	{'disease_resistance', 'insect_resistance'}	5A:576269075-576272554	Triticum aestivum	unknown
TraesCS5A02G391500	3	{'disease_resistance', 'salt_resistance', 'drought_resistance'}	5A:586668112-586670038	Triticum aestivum	unknown
TraesCS5A02G396300	2	{'disease_resistance', 'drought_resistance'}	5A:591133078-591142446	Triticum aestivum	unknown
TraesCS5A02G406100	3	{'disease_resistance', 'salt_resistance', 'plant_height_reduce'}	5A:597686223-597688271	Triticum aestivum	unknown
TraesCS5A02G414500	2	{'disease_resistance', 'drought_resistance'}	5A:602448552-602450234	Triticum aestivum	unknown
TraesCS5A02G426500	2	{'disease_resistance', 'salt_resistance'}	5A:611564144-611567697	Triticum aestivum	unknown
TraesCS5A02G426800	2	{'disease_resistance', 'salt_resistance'}	5A:611647144-611653336	Triticum aestivum	unknown
TraesCS5A02G434300	2	{'disease_resistance', 'salt_resistance'}	5A:617251251-617255279	Triticum aestivum	unknown
TraesCS5A02G454700	2	{'disease_resistance', 'salt_resistance'}	5A:635551677-635554335	Triticum aestivum	unknown
TraesCS5A02G454900	2	{'disease_resistance', 'salt_resistance'}	5A:635593690-635596159	Triticum aestivum	unknown
TraesCS5A02G459400	3	{'disease_resistance', 'salt_resistance', 'drought_resistance'}	5A:640168027-640174211	Triticum aestivum	unknown
TraesCS5A02G463100	2	{'disease_resistance', 'salt_resistance'}	5A:643328443-643333346	Triticum aestivum	unknown
TraesCS5A02G463200	2	{'salt_resistance', 'plant_height_reduce'}	5A:643357092-643359406	Triticum aestivum	unknown
TraesCS5A02G463300	3	{'disease_resistance', 'salt_resistance', 'plant_height_reduce'}	5A:643363993-643366230	Triticum aestivum	unknown
TraesCS5A02G482200	3	{'disease_resistance', 'salt_resistance', 'drought_resistance'}	5A:654078409-654081512	Triticum aestivum	unknown
TraesCS5A02G484300	2	{'salt_resistance', 'plant_height_reduce'}	5A:655461759-655463837	Triticum aestivum	unknown
TraesCS5A02G484600	2	{'salt_resistance', 'plant_height_reduce'}	5A:655990083-655992178	Triticum aestivum	unknown
TraesCS5A02G492000	3	{'disease_resistance', 'salt_resistance', 'drought_resistance'}	5A:661017152-661022159	Triticum aestivum	unknown
TraesCS5A02G503600	2	{'disease_resistance', 'drought_resistance'}	5A:669192588-669194728	Triticum aestivum	unknown
TraesCS5A02G511900	2	{'grain_weight_increase', 'plant_height_reduce'}	5A:675780859-675782634	Triticum aestivum	unknown
TraesCS5A02G519300	2	{'salt_resistance', 'drought_resistance'}	5A:680840973-680845421	Triticum aestivum	unknown
TraesCS5A02G520900	2	{'salt_resistance', 'drought_resistance'}	5A:681462913-681466878	Triticum aestivum	unknown
TraesCS5A02G525300	2	{'salt_resistance', 'drought_resistance'}	5A:685790993-685794738	Triticum aestivum	unknown
TraesCS5A02G537700	2	{'disease_resistance', 'salt_resistance'}	5A:694531263-694537577	Triticum aestivum	unknown
TraesCS5A02G537800	2	{'disease_resistance', 'salt_resistance'}	5A:694551658-694557982	Triticum aestivum	unknown
TraesCS5A02G537900	2	{'disease_resistance', 'salt_resistance'}	5A:694572003-694579717	Triticum aestivum	unknown
TraesCS5A02G545500	3	{'disease_resistance', 'salt_resistance', 'drought_resistance'}	5A:700435047-700438740	Triticum aestivum	unknown
TraesCS5A02G549700	2	{'disease_resistance', 'drought_resistance'}	5A:703397594-703406580	Triticum aestivum	unknown
TraesCS5A02G558100	2	{'disease_resistance', 'salt_resistance'}	5A:708743157-708744778	Triticum aestivum	unknown
TraesCS5A02G558300	2	{'disease_resistance', 'salt_resistance'}	5A:708848083-708851581	Triticum aestivum	unknown
TraesCS5B02G002400	2	{'disease_resistance', 'plant_height_reduce'}	5B:3849532-3862578	Triticum aestivum	unknown
TraesCS5B02G002600	3	{'disease_resistance', 'salt_resistance', 'drought_resistance'}	5B:3917424-3923351	Triticum aestivum	unknown
TraesCS5B02G017900	2	{'disease_resistance', 'salt_resistance'}	5B:17544779-17547737	Triticum aestivum	unknown
TraesCS5B02G072400	3	{'disease_resistance', 'salt_resistance', 'drought_resistance'}	5B:84656727-84658017	Triticum aestivum	unknown
TraesCS5B02G075800	3	{'disease_resistance', 'salt_resistance', 'drought_resistance'}	5B:90507294-90509733	Triticum aestivum	unknown
TraesCS5B02G084800	2	{'salt_resistance', 'plant_height_reduce'}	5B:107369228-107371559	Triticum aestivum	unknown
TraesCS5B02G096200	3	{'disease_resistance', 'salt_resistance', 'drought_resistance'}	5B:127501554-127506026	Triticum aestivum	unknown
TraesCS5B02G106300	2	{'disease_resistance', 'salt_resistance'}	5B:143714146-143720886	Triticum aestivum	unknown
TraesCS5B02G112900	2	{'disease_resistance', 'salt_resistance'}	5B:177640656-177650146	Triticum aestivum	unknown
TraesCS5B02G118200	2	{'salt_resistance', 'drought_resistance'}	5B:208701414-208703518	Triticum aestivum	unknown
TraesCS5B02G133400	2	{'disease_resistance', 'grain_weight_increase'}	5B:249366376-249369725	Triticum aestivum	unknown
TraesCS5B02G137600	2	{'disease_resistance', 'salt_resistance'}	5B:259538033-259540793	Triticum aestivum	unknown
TraesCS5B02G138300	3	{'disease_resistance', 'salt_resistance', 'drought_resistance'}	5B:262351251-262353253	Triticum aestivum	unknown
TraesCS5B02G141900	2	{'grain_weight_increase', 'plant_height_reduce'}	5B:267759465-267761170	Triticum aestivum	unknown
TraesCS5B02G146500	3	{'disease_resistance', 'salt_resistance', 'drought_resistance'}	5B:275032060-275035080	Triticum aestivum	unknown
TraesCS5B02G173900	2	{'salt_resistance', 'plant_height_reduce'}	5B:319322509-319324548	Triticum aestivum	unknown
TraesCS5B02G189200	2	{'disease_resistance', 'salt_resistance'}	5B:341062699-341068539	Triticum aestivum	unknown
TraesCS5B02G200600	2	{'salt_resistance', 'drought_resistance'}	5B:362809531-362815622	Triticum aestivum	unknown
TraesCS5B02G208100	2	{'salt_resistance', 'drought_resistance'}	5B:377541375-377546069	Triticum aestivum	unknown
TraesCS5B02G219400	2	{'salt_resistance', 'drought_resistance'}	5B:393666737-393670928	Triticum aestivum	unknown
TraesCS5B02G221600	3	{'disease_resistance', 'salt_resistance', 'drought_resistance'}	5B:395921495-395925997	Triticum aestivum	unknown
TraesCS5B02G222500	2	{'salt_resistance', 'drought_resistance'}	5B:397513704-397517375	Triticum aestivum	unknown
TraesCS5B02G223800	3	{'disease_resistance', 'salt_resistance', 'drought_resistance'}	5B:398625257-398626600	Triticum aestivum	unknown
TraesCS5B02G235600	2	{'salt_resistance', 'drought_resistance'}	5B:415992503-415996050	Triticum aestivum	unknown
TraesCS5B02G245700	2	{'disease_resistance', 'salt_resistance'}	5B:426650802-426652014	Triticum aestivum	unknown
TraesCS5B02G258900	2	{'disease_resistance', 'salt_resistance'}	5B:441448703-441452886	Triticum aestivum	unknown
TraesCS5B02G274600	3	{'disease_resistance', 'salt_resistance', 'drought_resistance'}	5B:460491577-460493189	Triticum aestivum	unknown
TraesCS5B02G275200	4	{'disease_resistance', 'salt_resistance', 'plant_height_reduce', 'drought_resistance'}	5B:461138969-461141732	Triticum aestivum	unknown
TraesCS5B02G295300	3	{'disease_resistance', 'salt_resistance', 'drought_resistance'}	5B:479202259-479206528	Triticum aestivum	unknown
TraesCS5B02G297700	2	{'disease_resistance', 'salt_resistance'}	5B:480291631-480295050	Triticum aestivum	unknown
TraesCS5B02G324400	2	{'disease_resistance', 'drought_resistance'}	5B:508675400-508678513	Triticum aestivum	unknown
TraesCS5B02G324500	2	{'disease_resistance', 'drought_resistance'}	5B:508680522-508683749	Triticum aestivum	unknown
TraesCS5B02G326500	2	{'salt_resistance', 'drought_resistance'}	5B:510729629-510732677	Triticum aestivum	unknown
TraesCS5B02G336100	2	{'salt_resistance', 'drought_resistance'}	5B:519146560-519153672	Triticum aestivum	unknown
TraesCS5B02G353300	2	{'disease_resistance', 'salt_resistance'}	5B:532891152-532895572	Triticum aestivum	unknown
TraesCS5B02G353400	2	{'disease_resistance', 'salt_resistance'}	5B:532931865-532935285	Triticum aestivum	unknown
TraesCS5B02G353600	2	{'disease_resistance', 'salt_resistance'}	5B:533033821-533038318	Triticum aestivum	unknown
TraesCS5B02G353700	2	{'disease_resistance', 'salt_resistance'}	5B:533087705-533093120	Triticum aestivum	unknown
TraesCS5B02G353900	2	{'disease_resistance', 'salt_resistance'}	5B:533382174-533386191	Triticum aestivum	unknown
TraesCS5B02G354000	2	{'disease_resistance', 'salt_resistance'}	5B:533388191-533391933	Triticum aestivum	unknown
TraesCS5B02G354100	2	{'disease_resistance', 'salt_resistance'}			unknown
TraesCS5B02G354200	2	{'disease_resistance', 'salt_resistance'}	5B:533492608-533496761	Triticum aestivum	unknown
TraesCS5B02G354400	2	{'disease_resistance', 'salt_resistance'}	5B:533507710-533511576	Triticum aestivum	unknown
TraesCS5B02G354700	2	{'disease_resistance', 'salt_resistance'}	5B:533571482-533575342	Triticum aestivum	unknown
TraesCS5B02G356100	2	{'salt_resistance', 'drought_resistance'}	5B:535704136-535707098	Triticum aestivum	unknown
TraesCS5B02G358800	2	{'disease_resistance', 'salt_resistance'}	5B:538717321-538719110	Triticum aestivum	unknown
TraesCS5B02G368300	3	{'disease_resistance', 'salt_resistance', 'drought_resistance'}	5B:546703873-546705896	Triticum aestivum	unknown
TraesCS5B02G375900	3	{'disease_resistance', 'salt_resistance', 'drought_resistance'}	5B:553724968-553727421	Triticum aestivum	unknown
TraesCS5B02G376900	2	{'disease_resistance', 'salt_resistance'}	5B:554725429-554730159	Triticum aestivum	unknown
TraesCS5B02G381500	2	{'disease_resistance', 'salt_resistance'}	5B:559763470-559765063	Triticum aestivum	unknown
TraesCS5B02G382300	2	{'disease_resistance', 'insect_resistance'}	5B:560441118-560444767	Triticum aestivum	unknown
TraesCS5B02G382400	2	{'disease_resistance', 'insect_resistance'}	5B:560729019-560732519	Triticum aestivum	unknown
TraesCS5B02G410900	3	{'disease_resistance', 'salt_resistance', 'plant_height_reduce'}	5B:586357606-586360321	Triticum aestivum	unknown
TraesCS5B02G428400	2	{'disease_resistance', 'salt_resistance'}	5B:604063931-604068312	Triticum aestivum	unknown
TraesCS5B02G428700	2	{'disease_resistance', 'salt_resistance'}	5B:604158345-604164480	Triticum aestivum	unknown
TraesCS5B02G437300	2	{'disease_resistance', 'salt_resistance'}	5B:610661530-610664653	Triticum aestivum	unknown
TraesCS5B02G449800	2	{'salt_resistance', 'plant_height_reduce'}	5B:622065913-622071318	Triticum aestivum	unknown
TraesCS5B02G449900	2	{'salt_resistance', 'plant_height_reduce'}	5B:622069028-622070494	Triticum aestivum	unknown
TraesCS5B02G464100	2	{'disease_resistance', 'salt_resistance'}	5B:639092433-639094462	Triticum aestivum	unknown
TraesCS5B02G464300	2	{'disease_resistance', 'salt_resistance'}	5B:639134483-639136998	Triticum aestivum	unknown
TraesCS5B02G469200	3	{'disease_resistance', 'salt_resistance', 'drought_resistance'}	5B:642831561-642837092	Triticum aestivum	unknown
TraesCS5B02G487600	2	{'salt_resistance', 'drought_resistance'}	5B:658542612-658548215	Triticum aestivum	unknown
TraesCS5B02G497800	2	{'salt_resistance', 'plant_height_reduce'}	5B:664682920-664685010	Triticum aestivum	unknown
TraesCS5B02G499900	2	{'disease_resistance', 'drought_resistance'}	5B:666188232-666192262	Triticum aestivum	unknown
TraesCS5B02G517500	3	{'disease_resistance', 'salt_resistance', 'drought_resistance'}	5B:680918139-680924775	Triticum aestivum	unknown
TraesCS5B02G522900	2	{'disease_resistance', 'drought_resistance'}	5B:684227667-684231381	Triticum aestivum	unknown
TraesCS5B02G523100	3	{'disease_resistance', 'salt_resistance', 'drought_resistance'}	5B:684386779-684387894	Triticum aestivum	unknown
TraesCS5B02G525600	2	{'salt_resistance', 'drought_resistance'}	5B:685432647-685437147	Triticum aestivum	unknown
TraesCS5B02G526000	2	{'disease_resistance', 'drought_resistance'}	5B:685565831-685569284	Triticum aestivum	unknown
TraesCS5B02G536500	3	{'disease_resistance', 'salt_resistance', 'drought_resistance'}	5B:692559588-692565223	Triticum aestivum	unknown
TraesCS5B02G565300	2	{'disease_resistance', 'drought_resistance'}	5B:710313393-710314470	Triticum aestivum	unknown
TraesCS5D02G001900	3	{'disease_resistance', 'salt_resistance', 'drought_resistance'}	5D:2135699-2142446	Triticum aestivum	unknown
TraesCS5D02G002200	2	{'disease_resistance', 'plant_height_reduce'}	5D:2291803-2303188	Triticum aestivum	unknown
TraesCS5D02G026000	2	{'disease_resistance', 'salt_resistance'}	5D:23296528-23299514	Triticum aestivum	unknown
TraesCS5D02G076500	3	{'disease_resistance', 'salt_resistance', 'drought_resistance'}	5D:75997252-75998355	Triticum aestivum	unknown
TraesCS5D02G102300	2	{'disease_resistance', 'drought_resistance'}	5D:115406746-115411343	Triticum aestivum	unknown
TraesCS5D02G113700	2	{'disease_resistance', 'salt_resistance'}	5D:132411582-132418740	Triticum aestivum	unknown
TraesCS5D02G118200	2	{'disease_resistance', 'plant_height_reduce'}	5D:156574094-156579643	Triticum aestivum	unknown
TraesCS5D02G119100	2	{'disease_resistance', 'salt_resistance'}	5D:161449229-161460176	Triticum aestivum	unknown
TraesCS5D02G129400	3	{'disease_resistance', 'salt_resistance', 'drought_resistance'}	5D:203057554-203059824	Triticum aestivum	unknown
TraesCS5D02G132500	3	{'disease_resistance', 'salt_resistance', 'drought_resistance'}	5D:210987954-210991810	Triticum aestivum	unknown
TraesCS5D02G139900	2	{'disease_resistance', 'grain_weight_increase'}	5D:223516603-223519872	Triticum aestivum	unknown
TraesCS5D02G148900	2	{'grain_weight_increase', 'plant_height_reduce'}	5D:238072948-238074652	Triticum aestivum	unknown
TraesCS5D02G149800	3	{'disease_resistance', 'salt_resistance', 'drought_resistance'}	5D:238668836-238670707	Triticum aestivum	unknown
TraesCS5D02G150700	2	{'salt_resistance', 'drought_resistance'}	5D:239938611-239942596	Triticum aestivum	unknown
TraesCS5D02G152400	3	{'disease_resistance', 'salt_resistance', 'drought_resistance'}	5D:241275707-241277708	Triticum aestivum	unknown
TraesCS5D02G153800	2	{'disease_resistance', 'salt_resistance'}	5D:242356551-242359441	Triticum aestivum	unknown
TraesCS5D02G166000	2	{'grain_weight_increase', 'salt_resistance'}	5D:258250076-258257688	Triticum aestivum	unknown
TraesCS5D02G190700	3	{'disease_resistance', 'salt_resistance', 'drought_resistance'}			unknown
TraesCS5D02G208300	2	{'salt_resistance', 'drought_resistance'}	5D:314836131-314841811	Triticum aestivum	unknown
TraesCS5D02G216300	2	{'salt_resistance', 'drought_resistance'}	5D:325092548-325096095	Triticum aestivum	unknown
TraesCS5D02G228300	2	{'salt_resistance', 'drought_resistance'}	5D:335770713-335774902	Triticum aestivum	unknown
TraesCS5D02G230300	3	{'disease_resistance', 'salt_resistance', 'drought_resistance'}	5D:337301390-337305745	Triticum aestivum	unknown
TraesCS5D02G231100	2	{'salt_resistance', 'drought_resistance'}	5D:338386897-338390472	Triticum aestivum	unknown
TraesCS5D02G232700	3	{'disease_resistance', 'salt_resistance', 'drought_resistance'}	5D:339968158-339969284	Triticum aestivum	unknown
TraesCS5D02G244500	2	{'salt_resistance', 'drought_resistance'}	5D:352929302-352933210	Triticum aestivum	unknown
TraesCS5D02G244900	2	{'salt_resistance', 'drought_resistance'}	5D:353510587-353513609	Triticum aestivum	unknown
TraesCS5D02G262700	2	{'disease_resistance', 'salt_resistance'}	5D:368573005-368574348	Triticum aestivum	unknown
TraesCS5D02G282500	3	{'disease_resistance', 'salt_resistance', 'drought_resistance'}	5D:384015946-384017492	Triticum aestivum	unknown
TraesCS5D02G283200	4	{'disease_resistance', 'salt_resistance', 'plant_height_reduce', 'drought_resistance'}	5D:384345607-384348360	Triticum aestivum	unknown
TraesCS5D02G302400	2	{'salt_resistance', 'drought_resistance'}	5D:398576928-398578415	Triticum aestivum	unknown
TraesCS5D02G303300	3	{'disease_resistance', 'salt_resistance', 'drought_resistance'}	5D:398908233-398910108	Triticum aestivum	unknown
TraesCS5D02G305200	2	{'disease_resistance', 'salt_resistance'}	5D:400278000-400281717	Triticum aestivum	unknown
TraesCS5D02G319000	2	{'disease_resistance', 'drought_resistance'}	5D:412076819-412078393	Triticum aestivum	unknown
TraesCS5D02G330900	2	{'disease_resistance', 'drought_resistance'}	5D:422000098-422003258	Triticum aestivum	unknown
TraesCS5D02G332200	2	{'salt_resistance', 'drought_resistance'}	5D:423232498-423235204	Triticum aestivum	unknown
TraesCS5D02G341800	2	{'salt_resistance', 'drought_resistance'}	5D:429904515-429911192	Triticum aestivum	unknown
TraesCS5D02G357700	2	{'disease_resistance', 'salt_resistance'}	5D:438361299-438372489	Triticum aestivum	unknown
TraesCS5D02G357800	2	{'disease_resistance', 'salt_resistance'}	5D:438387155-438390647	Triticum aestivum	unknown
TraesCS5D02G358000	2	{'disease_resistance', 'salt_resistance'}	5D:438437242-438441326	Triticum aestivum	unknown
TraesCS5D02G358600	2	{'disease_resistance', 'salt_resistance'}	5D:438543700-438547382	Triticum aestivum	unknown
TraesCS5D02G358700	2	{'disease_resistance', 'salt_resistance'}	5D:438557604-438562390	Triticum aestivum	unknown
TraesCS5D02G358900	2	{'disease_resistance', 'salt_resistance'}	5D:438573366-438576764	Triticum aestivum	unknown
TraesCS5D02G359000	2	{'disease_resistance', 'salt_resistance'}	5D:438587758-438592126	Triticum aestivum	unknown
TraesCS5D02G359200	2	{'disease_resistance', 'salt_resistance'}	5D:438603595-438607501	Triticum aestivum	unknown
TraesCS5D02G359500	2	{'disease_resistance', 'salt_resistance'}	5D:438720779-438724678	Triticum aestivum	unknown
TraesCS5D02G360800	2	{'salt_resistance', 'drought_resistance'}	5D:440369907-440372890	Triticum aestivum	unknown
TraesCS5D02G365100	2	{'disease_resistance', 'salt_resistance'}	5D:442496502-442498524	Triticum aestivum	unknown
TraesCS5D02G375500	3	{'disease_resistance', 'salt_resistance', 'drought_resistance'}	5D:447776364-447778785	Triticum aestivum	unknown
TraesCS5D02G378100	2	{'disease_resistance', 'drought_resistance'}	5D:449933900-449938536	Triticum aestivum	unknown
TraesCS5D02G384500	2	{'disease_resistance', 'salt_resistance'}	5D:453986700-453991851	Triticum aestivum	unknown
TraesCS5D02G387900	2	{'disease_resistance', 'salt_resistance'}	5D:457663678-457665461	Triticum aestivum	unknown
TraesCS5D02G401300	3	{'disease_resistance', 'salt_resistance', 'drought_resistance'}	5D:466568807-466570746	Triticum aestivum	unknown
TraesCS5D02G411900	3	{'disease_resistance', 'salt_resistance', 'drought_resistance'}	5D:475302359-475309094	Triticum aestivum	unknown
TraesCS5D02G416100	2	{'salt_resistance', 'plant_height_reduce'}	5D:478590584-478595774	Triticum aestivum	unknown
TraesCS5D02G422900	2	{'disease_resistance', 'drought_resistance'}	5D:482617802-482619448	Triticum aestivum	unknown
TraesCS5D02G434500	2	{'disease_resistance', 'salt_resistance'}	5D:489904535-489908838	Triticum aestivum	unknown
TraesCS5D02G434800	2	{'disease_resistance', 'salt_resistance'}	5D:490026551-490035692	Triticum aestivum	unknown
TraesCS5D02G452800	2	{'salt_resistance', 'plant_height_reduce'}	5D:500673407-500676191	Triticum aestivum	unknown
TraesCS5D02G452900	2	{'salt_resistance', 'plant_height_reduce'}	5D:500676511-500678914	Triticum aestivum	unknown
TraesCS5D02G465200	2	{'disease_resistance', 'salt_resistance'}	5D:507914672-507917100	Triticum aestivum	unknown
TraesCS5D02G465300	2	{'disease_resistance', 'salt_resistance'}	5D:507918779-507921034	Triticum aestivum	unknown
TraesCS5D02G470400	3	{'disease_resistance', 'salt_resistance', 'drought_resistance'}	5D:511878195-511883890	Triticum aestivum	unknown
TraesCS5D02G476000	2	{'salt_resistance', 'plant_height_reduce'}	5D:515244663-515246744	Triticum aestivum	unknown
TraesCS5D02G476100	2	{'salt_resistance', 'plant_height_reduce'}	5D:515250808-515252714	Triticum aestivum	unknown
TraesCS5D02G489500	3	{'disease_resistance', 'salt_resistance', 'plant_height_reduce'}	5D:524503915-524506150	Triticum aestivum	unknown
TraesCS5D02G497900	2	{'salt_resistance', 'plant_height_reduce'}	5D:527904895-527907361	Triticum aestivum	unknown
TraesCS5D02G498100	2	{'salt_resistance', 'plant_height_reduce'}	5D:528142000-528144081	Triticum aestivum	unknown
TraesCS5D02G500100	2	{'disease_resistance', 'drought_resistance'}	5D:528964545-528968723	Triticum aestivum	unknown
TraesCS5D02G513100	2	{'disease_resistance', 'insect_resistance'}	5D:537221655-537225469	Triticum aestivum	unknown
TraesCS5D02G524600	2	{'salt_resistance', 'drought_resistance'}	5D:543596185-543600775	Triticum aestivum	unknown
TraesCS5D02G534000	3	{'disease_resistance', 'salt_resistance', 'drought_resistance'}	5D:548348572-548354652	Triticum aestivum	unknown
TraesCS5D02G546700	2	{'salt_resistance', 'plant_height_reduce'}	5D:555190940-555193147	Triticum aestivum	unknown
TraesCS5D02G560600	2	{'disease_resistance', 'drought_resistance'}	5D:561672813-561678803	Triticum aestivum	unknown
TraesCS6A02G000500	2	{'disease_resistance', 'salt_resistance'}	6A:571479-575107	Triticum aestivum	unknown
TraesCS6A02G043900	2	{'disease_resistance', 'drought_resistance'}	6A:22953051-22955436	Triticum aestivum	unknown
TraesCS6A02G071700	2	{'salt_resistance', 'drought_resistance'}	6A:39171467-39177284	Triticum aestivum	unknown
TraesCS6A02G077800	3	{'disease_resistance', 'salt_resistance', 'drought_resistance'}	6A:47897303-47903558	Triticum aestivum	unknown
TraesCS6A02G078200	3	{'disease_resistance', 'salt_resistance', 'drought_resistance'}	6A:48103410-48107388	Triticum aestivum	unknown
TraesCS6A02G097400	2	{'disease_resistance', 'salt_resistance'}	6A:64504890-64507230	Triticum aestivum	unknown
TraesCS6A02G097500	3	{'disease_resistance', 'salt_resistance', 'drought_resistance'}	6A:64678666-64680638	Triticum aestivum	unknown
TraesCS6A02G097700	2	{'salt_resistance', 'drought_resistance'}	6A:64907108-64909506	Triticum aestivum	unknown
TraesCS6A02G099600	3	{'disease_resistance', 'salt_resistance', 'drought_resistance'}	6A:67126390-67137086	Triticum aestivum	unknown
TraesCS6A02G106500	2	{'salt_resistance', 'drought_resistance'}	6A:74390839-74392725	Triticum aestivum	unknown
TraesCS6A02G118100	3	{'disease_resistance', 'salt_resistance', 'drought_resistance'}	6A:88854990-88859282	Triticum aestivum	unknown
TraesCS6A02G132300	2	{'salt_resistance', 'plant_height_reduce'}	6A:104408108-104410700	Triticum aestivum	unknown
TraesCS6A02G132400	2	{'salt_resistance', 'plant_height_reduce'}	6A:104411857-104413938	Triticum aestivum	unknown
TraesCS6A02G132500	2	{'disease_resistance', 'insect_resistance'}	6A:104444101-104448319	Triticum aestivum	unknown
TraesCS6A02G135100	3	{'disease_resistance', 'salt_resistance', 'drought_resistance'}	6A:107111934-107113379	Triticum aestivum	unknown
TraesCS6A02G150000	2	{'salt_resistance', 'drought_resistance'}	6A:133755943-133761869	Triticum aestivum	unknown
TraesCS6A02G154300	3	{'disease_resistance', 'salt_resistance', 'drought_resistance'}	6A:143065577-143066975	Triticum aestivum	unknown
TraesCS6A02G158100	2	{'disease_resistance', 'plant_height_reduce'}	6A:148247969-148251188	Triticum aestivum	unknown
TraesCS6A02G184100	2	{'salt_resistance', 'drought_resistance'}	6A:214563731-214569359	Triticum aestivum	unknown
TraesCS6A02G186100	2	{'disease_resistance', 'drought_resistance'}	6A:219637746-219644370	Triticum aestivum	unknown
TraesCS6A02G199900	2	{'disease_resistance', 'drought_resistance'}	6A:319201021-319208932	Triticum aestivum	unknown
TraesCS6A02G203600	2	{'disease_resistance', 'grain_weight_increase'}	6A:349509306-349518822	Triticum aestivum	unknown
TraesCS6A02G215400	2	{'disease_resistance', 'salt_resistance'}	6A:396289533-396292690	Triticum aestivum	unknown
TraesCS6A02G226500	2	{'salt_resistance', 'drought_resistance'}	6A:426314889-426324916	Triticum aestivum	unknown
TraesCS6A02G236300	2	{'salt_resistance', 'plant_height_reduce'}	6A:445643427-445645584	Triticum aestivum	unknown
TraesCS6A02G243300	3	{'disease_resistance', 'salt_resistance', 'drought_resistance'}	6A:454710994-454712683	Triticum aestivum	unknown
TraesCS6A02G255900	2	{'disease_resistance', 'grain_weight_increase'}	6A:474982161-474987540	Triticum aestivum	unknown
TraesCS6A02G256400	2	{'disease_resistance', 'drought_resistance'}	6A:475999747-476001841	Triticum aestivum	unknown
TraesCS6A02G257600	3	{'disease_resistance', 'grain_weight_increase', 'plant_height_reduce'}	6A:479833651-479834702	Triticum aestivum	unknown
TraesCS6A02G269400	2	{'disease_resistance', 'salt_resistance'}	6A:495685844-495688911	Triticum aestivum	unknown
TraesCS6A02G269600	3	{'disease_resistance', 'grain_weight_increase', 'plant_height_reduce'}	6A:496010434-496017229	Triticum aestivum	unknown
TraesCS6A02G271300	2	{'salt_resistance', 'drought_resistance'}	6A:498006802-498009548	Triticum aestivum	unknown
TraesCS6A02G271600	3	{'disease_resistance', 'salt_resistance', 'drought_resistance'}	6A:498528029-498530961	Triticum aestivum	unknown
TraesCS6A02G279500	3	{'disease_resistance', 'salt_resistance', 'drought_resistance'}	6A:507093677-507095652	Triticum aestivum	unknown
TraesCS6A02G292300	2	{'disease_resistance', 'plant_height_reduce'}	6A:524304597-524312846	Triticum aestivum	unknown
TraesCS6A02G319600	2	{'salt_resistance', 'drought_resistance'}	6A:555088987-555089748	Triticum aestivum	unknown
TraesCS6A02G334800	2	{'salt_resistance', 'insect_resistance'}	6A:565391805-565392636	Triticum aestivum	unknown
TraesCS6A02G335900	3	{'disease_resistance', 'grain_weight_increase', 'plant_height_reduce'}	6A:568515906-568517951	Triticum aestivum	unknown
TraesCS6A02G343300	2	{'salt_resistance', 'drought_resistance'}	6A:577721892-577725302	Triticum aestivum	unknown
TraesCS6A02G345900	3	{'disease_resistance', 'salt_resistance', 'drought_resistance'}	6A:579141924-579143034	Triticum aestivum	unknown
TraesCS6A02G346500	3	{'disease_resistance', 'salt_resistance', 'drought_resistance'}	6A:579754012-579755126	Triticum aestivum	unknown
TraesCS6A02G346600	3	{'disease_resistance', 'salt_resistance', 'drought_resistance'}	6A:579759026-579760141	Triticum aestivum	unknown
TraesCS6A02G346800	3	{'disease_resistance', 'salt_resistance', 'drought_resistance'}	6A:579795173-579796287	Triticum aestivum	unknown
TraesCS6A02G352600	2	{'salt_resistance', 'plant_height_reduce'}	6A:584957001-584958443	Triticum aestivum	unknown
TraesCS6A02G352700	2	{'salt_resistance', 'plant_height_reduce'}	6A:584979889-584982420	Triticum aestivum	unknown
TraesCS6A02G352800	2	{'salt_resistance', 'plant_height_reduce'}	6A:584988528-584990567	Triticum aestivum	unknown
TraesCS6A02G352900	2	{'salt_resistance', 'plant_height_reduce'}	6A:584997804-584999843	Triticum aestivum	unknown
TraesCS6A02G353600	2	{'salt_resistance', 'drought_resistance'}	6A:585196649-585200114	Triticum aestivum	unknown
TraesCS6A02G390400	2	{'disease_resistance', 'salt_resistance'}	6A:605358393-605363416	Triticum aestivum	unknown
TraesCS6A02G390500	2	{'disease_resistance', 'salt_resistance'}	6A:605367088-605370483	Triticum aestivum	unknown
TraesCS6A02G408600	2	{'salt_resistance', 'plant_height_reduce'}	6A:613303243-613305597	Triticum aestivum	unknown
TraesCS6A02G408800	2	{'salt_resistance', 'plant_height_reduce'}	6A:613315529-613317193	Triticum aestivum	unknown
TraesCS6A02G421000	2	{'disease_resistance', 'salt_resistance'}	6A:617656796-617658839	Triticum aestivum	unknown
TraesCS6B02G017000	2	{'disease_resistance', 'salt_resistance'}	6B:10926195-10928285	Triticum aestivum	unknown
TraesCS6B02G059800	2	{'disease_resistance', 'drought_resistance'}	6B:39367149-39369522	Triticum aestivum	unknown
TraesCS6B02G069200	2	{'disease_resistance', 'drought_resistance'}	6B:46742268-46742651	Triticum aestivum	unknown
TraesCS6B02G096200	2	{'salt_resistance', 'drought_resistance'}	6B:72331858-72340562	Triticum aestivum	unknown
TraesCS6B02G104600	3	{'disease_resistance', 'salt_resistance', 'drought_resistance'}	6B:84123947-84130085	Triticum aestivum	unknown
TraesCS6B02G110200	2	{'disease_resistance', 'salt_resistance'}	6B:92523435-92524395	Triticum aestivum	unknown
TraesCS6B02G125800	2	{'disease_resistance', 'salt_resistance'}	6B:120802360-120804429	Triticum aestivum	unknown
TraesCS6B02G125900	2	{'salt_resistance', 'drought_resistance'}	6B:121431372-121433796	Triticum aestivum	unknown
TraesCS6B02G126600	3	{'disease_resistance', 'salt_resistance', 'drought_resistance'}	6B:121958775-121961238	Triticum aestivum	unknown
TraesCS6B02G126700	2	{'salt_resistance', 'drought_resistance'}	6B:122186080-122187688	Triticum aestivum	unknown
TraesCS6B02G127800	3	{'disease_resistance', 'salt_resistance', 'drought_resistance'}	6B:123702609-123715378	Triticum aestivum	unknown
TraesCS6B02G160400	2	{'disease_resistance', 'insect_resistance'}	6B:164357412-164360569	Triticum aestivum	unknown
TraesCS6B02G160500	2	{'salt_resistance', 'plant_height_reduce'}	6B:164362924-164364966	Triticum aestivum	unknown
TraesCS6B02G160600	2	{'salt_resistance', 'plant_height_reduce'}	6B:164371930-164374339	Triticum aestivum	unknown
TraesCS6B02G163100	3	{'disease_resistance', 'salt_resistance', 'drought_resistance'}	6B:169316750-169319635	Triticum aestivum	unknown
TraesCS6B02G178000	2	{'salt_resistance', 'drought_resistance'}	6B:196674607-196680153	Triticum aestivum	unknown
TraesCS6B02G182100	3	{'disease_resistance', 'salt_resistance', 'drought_resistance'}	6B:204114349-204115757	Triticum aestivum	unknown
TraesCS6B02G182200	3	{'disease_resistance', 'salt_resistance', 'drought_resistance'}	6B:204123921-204125365	Triticum aestivum	unknown
TraesCS6B02G186700	2	{'disease_resistance', 'plant_height_reduce'}	6B:212968226-212970183	Triticum aestivum	unknown
TraesCS6B02G193400	2	{'disease_resistance', 'insect_resistance'}	6B:228239278-228243099	Triticum aestivum	unknown
TraesCS6B02G210200	2	{'salt_resistance', 'drought_resistance'}	6B:277612837-277616723	Triticum aestivum	unknown
TraesCS6B02G212600	2	{'salt_resistance', 'drought_resistance'}	6B:281226434-281231988	Triticum aestivum	unknown
TraesCS6B02G215100	2	{'disease_resistance', 'drought_resistance'}	6B:290710332-290718338	Triticum aestivum	unknown
TraesCS6B02G223700	2	{'disease_resistance', 'grain_weight_increase'}	6B:337231046-337240157	Triticum aestivum	unknown
TraesCS6B02G230900	2	{'disease_resistance', 'drought_resistance'}	6B:376291309-376301617	Triticum aestivum	unknown
TraesCS6B02G245000	2	{'disease_resistance', 'salt_resistance'}	6B:437470814-437471854	Triticum aestivum	unknown
TraesCS6B02G267500	3	{'disease_resistance', 'grain_weight_increase', 'plant_height_reduce'}	6B:481089083-481090143	Triticum aestivum	unknown
TraesCS6B02G269000	2	{'disease_resistance', 'drought_resistance'}	6B:484099232-484101310	Triticum aestivum	unknown
TraesCS6B02G280800	3	{'disease_resistance', 'salt_resistance', 'drought_resistance'}	6B:506835026-506836457	Triticum aestivum	unknown
TraesCS6B02G296700	2	{'disease_resistance', 'salt_resistance'}	6B:532338556-532341647	Triticum aestivum	unknown
TraesCS6B02G296900	3	{'disease_resistance', 'grain_weight_increase', 'plant_height_reduce'}	6B:532899954-532903804	Triticum aestivum	unknown
TraesCS6B02G298500	2	{'salt_resistance', 'drought_resistance'}	6B:536003345-536005986	Triticum aestivum	unknown
TraesCS6B02G308300	3	{'disease_resistance', 'salt_resistance', 'drought_resistance'}	6B:552244998-552246897	Triticum aestivum	unknown
TraesCS6B02G319700	2	{'disease_resistance', 'grain_weight_increase'}	6B:567406889-567411624	Triticum aestivum	unknown
TraesCS6B02G322700	2	{'disease_resistance', 'plant_height_reduce'}	6B:571729605-571737175	Triticum aestivum	unknown
TraesCS6B02G350000	2	{'salt_resistance', 'drought_resistance'}	6B:615166995-615167808	Triticum aestivum	unknown
TraesCS6B02G357600	3	{'disease_resistance', 'salt_resistance', 'drought_resistance'}	6B:625778598-625781138	Triticum aestivum	unknown
TraesCS6B02G365200	2	{'salt_resistance', 'insect_resistance'}	6B:636878180-636879371	Triticum aestivum	unknown
TraesCS6B02G378400	3	{'disease_resistance', 'salt_resistance', 'drought_resistance'}	6B:653193604-653194717	Triticum aestivum	unknown
TraesCS6B02G378900	3	{'disease_resistance', 'salt_resistance', 'drought_resistance'}	6B:653714433-653715546	Triticum aestivum	unknown
TraesCS6B02G379000	3	{'disease_resistance', 'salt_resistance', 'drought_resistance'}	6B:653787576-653788676	Triticum aestivum	unknown
TraesCS6B02G379200	3	{'disease_resistance', 'salt_resistance', 'drought_resistance'}	6B:653855328-653856440	Triticum aestivum	unknown
TraesCS6B02G379300	3	{'disease_resistance', 'salt_resistance', 'drought_resistance'}	6B:653871436-653872547	Triticum aestivum	unknown
TraesCS6B02G379500	2	{'disease_resistance', 'salt_resistance'}	6B:654608355-654610058	Triticum aestivum	unknown
TraesCS6B02G380000	3	{'disease_resistance', 'salt_resistance', 'drought_resistance'}	6B:654917608-654918723	Triticum aestivum	unknown
TraesCS6B02G380200	3	{'disease_resistance', 'salt_resistance', 'drought_resistance'}	6B:655053470-655054583	Triticum aestivum	unknown
TraesCS6B02G385500	2	{'salt_resistance', 'plant_height_reduce'}	6B:660258402-660260423	Triticum aestivum	unknown
TraesCS6B02G385600	2	{'salt_resistance', 'plant_height_reduce'}	6B:660267290-660269323	Triticum aestivum	unknown
TraesCS6B02G386200	2	{'salt_resistance', 'drought_resistance'}	6B:660676250-660680341	Triticum aestivum	unknown
TraesCS6B02G407000	2	{'disease_resistance', 'grain_weight_increase'}	6B:681221688-681259027	Triticum aestivum	unknown
TraesCS6B02G423900	2	{'salt_resistance', 'drought_resistance'}	6B:693794490-693797859	Triticum aestivum	unknown
TraesCS6B02G430800	2	{'disease_resistance', 'salt_resistance'}	6B:698974724-698978209	Triticum aestivum	unknown
TraesCS6B02G430900	2	{'disease_resistance', 'salt_resistance'}	6B:698987216-698991173	Triticum aestivum	unknown
TraesCS6B02G454900	2	{'salt_resistance', 'plant_height_reduce'}	6B:712230259-712232684	Triticum aestivum	unknown
TraesCS6B02G464800	2	{'salt_resistance', 'drought_resistance'}	6B:716009442-716015329	Triticum aestivum	unknown
TraesCS6B02G467300	2	{'disease_resistance', 'salt_resistance'}	6B:717074600-717077211	Triticum aestivum	unknown
TraesCS6D02G000300	2	{'salt_resistance', 'drought_resistance'}	6D:88938-95787	Triticum aestivum	unknown
TraesCS6D02G032600	2	{'disease_resistance', 'drought_resistance'}	6D:13724219-13735758	Triticum aestivum	unknown
TraesCS6D02G050900	2	{'disease_resistance', 'drought_resistance'}	6D:24375492-24377880	Triticum aestivum	unknown
TraesCS6D02G082900	3	{'disease_resistance', 'salt_resistance', 'drought_resistance'}	6D:47937604-47944111	Triticum aestivum	unknown
TraesCS6D02G084200	3	{'disease_resistance', 'salt_resistance', 'drought_resistance'}	6D:49181616-49184120	Triticum aestivum	unknown
TraesCS6D02G084900	2	{'salt_resistance', 'drought_resistance'}	6D:50178640-50181160	Triticum aestivum	unknown
TraesCS6D02G085000	3	{'disease_resistance', 'salt_resistance', 'drought_resistance'}	6D:50604107-50606425	Triticum aestivum	unknown
TraesCS6D02G085100	2	{'disease_resistance', 'salt_resistance'}	6D:50671903-50673893	Triticum aestivum	unknown
TraesCS6D02G108100	3	{'disease_resistance', 'salt_resistance', 'drought_resistance'}	6D:72229215-72231632	Triticum aestivum	unknown
TraesCS6D02G122100	2	{'salt_resistance', 'plant_height_reduce'}	6D:86721153-86723485	Triticum aestivum	unknown
TraesCS6D02G122200	2	{'salt_resistance', 'plant_height_reduce'}	6D:86724880-86726943	Triticum aestivum	unknown
TraesCS6D02G139700	2	{'salt_resistance', 'drought_resistance'}	6D:108777826-108783095	Triticum aestivum	unknown
TraesCS6D02G144000	3	{'disease_resistance', 'salt_resistance', 'drought_resistance'}	6D:114842756-114844153	Triticum aestivum	unknown
TraesCS6D02G144100	3	{'disease_resistance', 'salt_resistance', 'drought_resistance'}	6D:114847542-114848865	Triticum aestivum	unknown
TraesCS6D02G168400	2	{'salt_resistance', 'drought_resistance'}	6D:153807374-153811200	Triticum aestivum	unknown
TraesCS6D02G171000	2	{'salt_resistance', 'drought_resistance'}	6D:157583544-157589113	Triticum aestivum	unknown
TraesCS6D02G173100	2	{'disease_resistance', 'drought_resistance'}	6D:160559700-160566306	Triticum aestivum	unknown
TraesCS6D02G185500	2	{'disease_resistance', 'drought_resistance'}	6D:239043416-239050384	Triticum aestivum	unknown
TraesCS6D02G186900	2	{'disease_resistance', 'grain_weight_increase'}	6D:249448513-249457046	Triticum aestivum	unknown
TraesCS6D02G191400	2	{'salt_resistance', 'plant_height_reduce'}	6D:264177922-264180265	Triticum aestivum	unknown
TraesCS6D02G191500	3	{'disease_resistance', 'salt_resistance', 'plant_height_reduce'}	6D:264440893-264443247	Triticum aestivum	unknown
TraesCS6D02G197700	2	{'disease_resistance', 'salt_resistance'}	6D:275665423-275668463	Triticum aestivum	unknown
TraesCS6D02G208500	2	{'salt_resistance', 'drought_resistance'}	6D:294171533-294178469	Triticum aestivum	unknown
TraesCS6D02G219000	2	{'salt_resistance', 'plant_height_reduce'}	6D:308937482-308939644	Triticum aestivum	unknown
TraesCS6D02G225500	3	{'disease_resistance', 'salt_resistance', 'drought_resistance'}	6D:317105080-317106446	Triticum aestivum	unknown
TraesCS6D02G225700	3	{'disease_resistance', 'salt_resistance', 'drought_resistance'}	6D:317413925-317417738	Triticum aestivum	unknown
TraesCS6D02G237100	2	{'disease_resistance', 'grain_weight_increase'}	6D:335335773-335339806	Triticum aestivum	unknown
TraesCS6D02G237600	2	{'disease_resistance', 'drought_resistance'}	6D:336366087-336368228	Triticum aestivum	unknown
TraesCS6D02G238900	3	{'disease_resistance', 'grain_weight_increase', 'plant_height_reduce'}	6D:339389350-339390413	Triticum aestivum	unknown
TraesCS6D02G243800	2	{'salt_resistance', 'drought_resistance'}	6D:346098635-346101306	Triticum aestivum	unknown
TraesCS6D02G245300	3	{'disease_resistance', 'grain_weight_increase', 'plant_height_reduce'}	6D:347433246-347436961	Triticum aestivum	unknown
TraesCS6D02G245500	2	{'disease_resistance', 'salt_resistance'}	6D:347684447-347687540	Triticum aestivum	unknown
TraesCS6D02G251800	3	{'disease_resistance', 'salt_resistance', 'drought_resistance'}	6D:355857551-355859470	Triticum aestivum	unknown
TraesCS6D02G259900	3	{'disease_resistance', 'salt_resistance', 'drought_resistance'}	6D:366539575-366541972	Triticum aestivum	unknown
TraesCS6D02G273500	2	{'disease_resistance', 'plant_height_reduce'}	6D:382345159-382353652	Triticum aestivum	unknown
TraesCS6D02G286300	4	{'disease_resistance', 'grain_weight_increase', 'salt_resistance', 'drought_resistance'}	6D:394825725-394828423	Triticum aestivum	unknown
TraesCS6D02G301700	2	{'disease_resistance', 'drought_resistance'}	6D:411401531-411407358	Triticum aestivum	unknown
TraesCS6D02G306300	3	{'disease_resistance', 'salt_resistance', 'drought_resistance'}	6D:415026955-415029482	Triticum aestivum	unknown
TraesCS6D02G315700	3	{'disease_resistance', 'grain_weight_increase', 'plant_height_reduce'}	6D:423814859-423816885	Triticum aestivum	unknown
TraesCS6D02G324200	2	{'salt_resistance', 'drought_resistance'}	6D:430844082-430847579	Triticum aestivum	unknown
TraesCS6D02G328000	3	{'disease_resistance', 'salt_resistance', 'drought_resistance'}	6D:432913237-432914350	Triticum aestivum	unknown
TraesCS6D02G328100	3	{'disease_resistance', 'salt_resistance', 'drought_resistance'}	6D:432930261-432931430	Triticum aestivum	unknown
TraesCS6D02G328300	3	{'disease_resistance', 'salt_resistance', 'drought_resistance'}	6D:433154128-433155240	Triticum aestivum	unknown
TraesCS6D02G328500	3	{'disease_resistance', 'salt_resistance', 'drought_resistance'}	6D:433257912-433259024	Triticum aestivum	unknown
TraesCS6D02G328600	3	{'disease_resistance', 'salt_resistance', 'drought_resistance'}	6D:433279463-433280573	Triticum aestivum	unknown
TraesCS6D02G328800	2	{'disease_resistance', 'salt_resistance'}	6D:433408096-433409202	Triticum aestivum	unknown
TraesCS6D02G329400	3	{'disease_resistance', 'salt_resistance', 'drought_resistance'}	6D:433547631-433548746	Triticum aestivum	unknown
TraesCS6D02G329500	3	{'disease_resistance', 'salt_resistance', 'drought_resistance'}	6D:433562756-433563871	Triticum aestivum	unknown
TraesCS6D02G329600	3	{'disease_resistance', 'salt_resistance', 'drought_resistance'}	6D:433568457-433569572	Triticum aestivum	unknown
TraesCS6D02G329900	3	{'disease_resistance', 'salt_resistance', 'drought_resistance'}	6D:433592880-433593996	Triticum aestivum	unknown
TraesCS6D02G335300	2	{'salt_resistance', 'plant_height_reduce'}	6D:436764829-436766844	Triticum aestivum	unknown
TraesCS6D02G335400	2	{'salt_resistance', 'plant_height_reduce'}	6D:436770030-436772078	Triticum aestivum	unknown
TraesCS6D02G335900	2	{'salt_resistance', 'drought_resistance'}	6D:436887329-436890971	Triticum aestivum	unknown
TraesCS6D02G369400	2	{'salt_resistance', 'drought_resistance'}	6D:456103961-456107439	Triticum aestivum	unknown
TraesCS6D02G375700	2	{'disease_resistance', 'salt_resistance'}	6D:458973455-458977465	Triticum aestivum	unknown
TraesCS6D02G376600	2	{'disease_resistance', 'salt_resistance'}	6D:459244397-459248485	Triticum aestivum	unknown
TraesCS6D02G392500	2	{'salt_resistance', 'plant_height_reduce'}	6D:467007359-467009611	Triticum aestivum	unknown
TraesCS6D02G392600	2	{'salt_resistance', 'plant_height_reduce'}	6D:467010060-467011685	Triticum aestivum	unknown
TraesCS6D02G404800	2	{'disease_resistance', 'salt_resistance'}	6D:472356725-472359218	Triticum aestivum	unknown
TraesCS7A02G006400	2	{'grain_weight_increase', 'insect_resistance'}	7A:3138238-3141576	Triticum aestivum	unknown
TraesCS7A02G012000	3	{'disease_resistance', 'salt_resistance', 'drought_resistance'}	7A:5199401-5202155	Triticum aestivum	unknown
TraesCS7A02G013400	2	{'disease_resistance', 'drought_resistance'}	7A:6096469-6102394	Triticum aestivum	unknown
TraesCS7A02G033100	3	{'disease_resistance', 'salt_resistance', 'drought_resistance'}	7A:14189219-14194496	Triticum aestivum	unknown
TraesCS7A02G033600	3	{'disease_resistance', 'salt_resistance', 'drought_resistance'}	7A:14794919-14796476	Triticum aestivum	unknown
TraesCS7A02G048200	3	{'disease_resistance', 'salt_resistance', 'drought_resistance'}	7A:22382832-22385918	Triticum aestivum	unknown
TraesCS7A02G049100	3	{'disease_resistance', 'grain_weight_increase', 'plant_height_reduce'}	7A:22937762-22943978	Triticum aestivum	unknown
TraesCS7A02G049200	2	{'disease_resistance', 'salt_resistance'}	7A:22944306-22948002	Triticum aestivum	unknown
TraesCS7A02G085400	3	{'disease_resistance', 'salt_resistance', 'plant_height_reduce'}	7A:49963686-49965128	Triticum aestivum	unknown
TraesCS7A02G085500	3	{'disease_resistance', 'salt_resistance', 'plant_height_reduce'}	7A:49985060-49986502	Triticum aestivum	unknown
TraesCS7A02G085600	2	{'salt_resistance', 'plant_height_reduce'}	7A:49989017-49991266	Triticum aestivum	unknown
TraesCS7A02G092300	3	{'disease_resistance', 'salt_resistance', 'drought_resistance'}	7A:56151832-56157135	Triticum aestivum	unknown
TraesCS7A02G096300	3	{'disease_resistance', 'salt_resistance', 'drought_resistance'}	7A:59228624-59233309	Triticum aestivum	unknown
TraesCS7A02G096500	3	{'disease_resistance', 'salt_resistance', 'drought_resistance'}	7A:59349063-59353732	Triticum aestivum	unknown
TraesCS7A02G096800	3	{'disease_resistance', 'salt_resistance', 'drought_resistance'}	7A:59400338-59403948	Triticum aestivum	unknown
TraesCS7A02G102400	2	{'disease_resistance', 'salt_resistance'}	7A:62878982-62882679	Triticum aestivum	unknown
TraesCS7A02G108200	2	{'salt_resistance', 'drought_resistance'}	7A:65515226-65522601	Triticum aestivum	unknown
TraesCS7A02G111700	2	{'disease_resistance', 'plant_height_reduce'}	7A:68227268-68236464	Triticum aestivum	unknown
TraesCS7A02G111800	2	{'disease_resistance', 'plant_height_reduce'}	7A:68324797-68338010	Triticum aestivum	unknown
TraesCS7A02G111900	2	{'disease_resistance', 'plant_height_reduce'}	7A:68740581-68762098	Triticum aestivum	unknown
TraesCS7A02G118800	2	{'salt_resistance', 'drought_resistance'}	7A:76486026-76493786	Triticum aestivum	unknown
TraesCS7A02G118900	2	{'salt_resistance', 'drought_resistance'}	7A:76498276-76504576	Triticum aestivum	unknown
TraesCS7A02G119000	2	{'salt_resistance', 'drought_resistance'}	7A:76511029-76518387	Triticum aestivum	unknown
TraesCS7A02G119100	2	{'salt_resistance', 'drought_resistance'}	7A:76829632-76833296	Triticum aestivum	unknown
TraesCS7A02G119300	2	{'salt_resistance', 'drought_resistance'}	7A:76938327-76944048	Triticum aestivum	unknown
TraesCS7A02G119500	2	{'salt_resistance', 'drought_resistance'}	7A:76979797-76987385	Triticum aestivum	unknown
TraesCS7A02G119800	2	{'salt_resistance', 'drought_resistance'}	7A:77158807-77164401	Triticum aestivum	unknown
TraesCS7A02G122100	2	{'disease_resistance', 'plant_height_reduce'}	7A:78568556-78575430	Triticum aestivum	unknown
TraesCS7A02G139900	2	{'salt_resistance', 'plant_height_reduce'}	7A:91647223-91648763	Triticum aestivum	unknown
TraesCS7A02G152500	4	{'disease_resistance', 'salt_resistance', 'plant_height_reduce', 'drought_resistance'}	7A:105777084-105778264	Triticum aestivum	unknown
TraesCS7A02G158000	2	{'salt_resistance', 'drought_resistance'}	7A:112263526-112266127	Triticum aestivum	unknown
TraesCS7A02G165600	3	{'disease_resistance', 'grain_weight_increase', 'plant_height_reduce'}	7A:121056090-121057606	Triticum aestivum	unknown
TraesCS7A02G166100	2	{'salt_resistance', 'plant_height_reduce'}	7A:121844303-121846432	Triticum aestivum	unknown
TraesCS7A02G174500	2	{'salt_resistance', 'drought_resistance'}	7A:128404791-128406105	Triticum aestivum	unknown
TraesCS7A02G174700	2	{'salt_resistance', 'drought_resistance'}	7A:128509817-128511499	Triticum aestivum	unknown
TraesCS7A02G242200	2	{'disease_resistance', 'salt_resistance'}	7A:217555578-217559792	Triticum aestivum	unknown
TraesCS7A02G247600	4	{'disease_resistance', 'grain_weight_increase', 'salt_resistance', 'plant_height_reduce'}	7A:228261234-228263284	Triticum aestivum	unknown
TraesCS7A02G264200	3	{'disease_resistance', 'salt_resistance', 'drought_resistance'}	7A:262852233-262854074	Triticum aestivum	unknown
TraesCS7A02G269500	2	{'disease_resistance', 'drought_resistance'}	7A:274661225-274663027	Triticum aestivum	unknown
TraesCS7A02G293300	2	{'disease_resistance', 'grain_weight_increase'}	7A:373858342-373871177	Triticum aestivum	unknown
TraesCS7A02G299300	3	{'disease_resistance', 'salt_resistance', 'drought_resistance'}	7A:409308252-409311560	Triticum aestivum	unknown
TraesCS7A02G331500	3	{'disease_resistance', 'salt_resistance', 'drought_resistance'}	7A:484593672-484597188	Triticum aestivum	unknown
TraesCS7A02G334800	5	{'grain_weight_increase', 'disease_resistance', 'drought_resistance', 'plant_height_reduce', 'salt_resistance'}	7A:489162812-489165357	Triticum aestivum	unknown
TraesCS7A02G335300	3	{'disease_resistance', 'salt_resistance', 'drought_resistance'}	7A:490831796-490841272	Triticum aestivum	unknown
TraesCS7A02G338500	3	{'disease_resistance', 'salt_resistance', 'drought_resistance'}	7A:495538325-495539966	Triticum aestivum	unknown
TraesCS7A02G352200	2	{'salt_resistance', 'drought_resistance'}	7A:515879021-515880777	Triticum aestivum	unknown
TraesCS7A02G358100	2	{'salt_resistance', 'drought_resistance'}	7A:527534607-527540462	Triticum aestivum	unknown
TraesCS7A02G358200	2	{'salt_resistance', 'drought_resistance'}	7A:527995110-527996032	Triticum aestivum	unknown
TraesCS7A02G365600	2	{'salt_resistance', 'drought_resistance'}	7A:539543850-539554190	Triticum aestivum	unknown
TraesCS7A02G369700	2	{'disease_resistance', 'salt_resistance'}	7A:543339785-543343567	Triticum aestivum	unknown
TraesCS7A02G373900	3	{'disease_resistance', 'salt_resistance', 'drought_resistance'}	7A:546708933-546712319	Triticum aestivum	unknown
TraesCS7A02G376500	2	{'salt_resistance', 'drought_resistance'}	7A:549527735-549531534	Triticum aestivum	unknown
TraesCS7A02G377400	2	{'salt_resistance', 'drought_resistance'}	7A:551541411-551543889	Triticum aestivum	unknown
TraesCS7A02G410700	3	{'disease_resistance', 'salt_resistance', 'drought_resistance'}	7A:598216576-598222568	Triticum aestivum	unknown
TraesCS7A02G498200	2	{'salt_resistance', 'drought_resistance'}	7A:688685229-688694372	Triticum aestivum	unknown
TraesCS7A02G501400	2	{'salt_resistance', 'drought_resistance'}	7A:691149254-691153759	Triticum aestivum	unknown
TraesCS7A02G508700	3	{'disease_resistance', 'salt_resistance', 'drought_resistance'}	7A:696552429-696554132	Triticum aestivum	unknown
TraesCS7A02G508800	3	{'disease_resistance', 'salt_resistance', 'drought_resistance'}	7A:696622151-696623562	Triticum aestivum	unknown
TraesCS7A02G539000	3	{'disease_resistance', 'salt_resistance', 'drought_resistance'}	7A:716239186-716241006	Triticum aestivum	unknown
TraesCS7A02G544900	2	{'salt_resistance', 'drought_resistance'}	7A:721162987-721166033	Triticum aestivum	unknown
TraesCS7A02G545000	2	{'salt_resistance', 'drought_resistance'}	7A:721172054-721176909	Triticum aestivum	unknown
TraesCS7A02G569900	2	{'plant_height_reduce', 'insect_resistance'}	7A:736688691-736692766	Triticum aestivum	unknown
TraesCS7B02G009200	3	{'disease_resistance', 'salt_resistance', 'drought_resistance'}	7B:5513957-5521157	Triticum aestivum	unknown
TraesCS7B02G009500	2	{'disease_resistance', 'plant_height_reduce'}	7B:5981561-5999719	Triticum aestivum	unknown
TraesCS7B02G009800	2	{'disease_resistance', 'plant_height_reduce'}	7B:6066133-6078702	Triticum aestivum	unknown
TraesCS7B02G015400	2	{'salt_resistance', 'drought_resistance'}	7B:12531909-12540105	Triticum aestivum	unknown
TraesCS7B02G016100	2	{'salt_resistance', 'drought_resistance'}	7B:13801020-13808771	Triticum aestivum	unknown
TraesCS7B02G016500	2	{'salt_resistance', 'drought_resistance'}	7B:14063107-14072046	Triticum aestivum	unknown
TraesCS7B02G017500	2	{'salt_resistance', 'drought_resistance'}	7B:14996011-15001555	Triticum aestivum	unknown
TraesCS7B02G062200	2	{'salt_resistance', 'drought_resistance'}	7B:65660420-65663385	Triticum aestivum	unknown
TraesCS7B02G069800	3	{'disease_resistance', 'grain_weight_increase', 'plant_height_reduce'}	7B:75151744-75159642	Triticum aestivum	unknown
TraesCS7B02G070200	3	{'disease_resistance', 'grain_weight_increase', 'plant_height_reduce'}	7B:76903837-76905287	Triticum aestivum	unknown
TraesCS7B02G079300	2	{'salt_resistance', 'drought_resistance'}	7B:89541640-89543039	Triticum aestivum	unknown
TraesCS7B02G079400	2	{'salt_resistance', 'drought_resistance'}	7B:89559806-89560663	Triticum aestivum	unknown
TraesCS7B02G079500	2	{'salt_resistance', 'drought_resistance'}			unknown
TraesCS7B02G143900	5	{'grain_weight_increase', 'disease_resistance', 'drought_resistance', 'plant_height_reduce', 'salt_resistance'}	7B:185059214-185061503	Triticum aestivum	unknown
TraesCS7B02G162100	2	{'salt_resistance', 'drought_resistance'}	7B:222312989-222315114	Triticum aestivum	unknown
TraesCS7B02G162200	3	{'disease_resistance', 'salt_resistance', 'drought_resistance'}	7B:222553048-222554617	Triticum aestivum	unknown
TraesCS7B02G165200	2	{'disease_resistance', 'salt_resistance'}	7B:228362103-228364342	Triticum aestivum	unknown
TraesCS7B02G167700	2	{'disease_resistance', 'drought_resistance'}	7B:233025980-233027801	Triticum aestivum	unknown
TraesCS7B02G182300	2	{'disease_resistance', 'grain_weight_increase'}	7B:283106362-283124522	Triticum aestivum	unknown
TraesCS7B02G188400	3	{'disease_resistance', 'salt_resistance', 'drought_resistance'}	7B:319852376-319859140	Triticum aestivum	unknown
TraesCS7B02G196900	2	{'salt_resistance', 'drought_resistance'}	7B:339605849-339611728	Triticum aestivum	unknown
TraesCS7B02G201000	3	{'disease_resistance', 'salt_resistance', 'drought_resistance'}	7B:366124506-366127810	Triticum aestivum	unknown
TraesCS7B02G203300	2	{'salt_resistance', 'drought_resistance'}	7B:372820558-372826592	Triticum aestivum	unknown
TraesCS7B02G232100	2	{'salt_resistance', 'drought_resistance'}	7B:435112637-435118378	Triticum aestivum	unknown
TraesCS7B02G243200	3	{'disease_resistance', 'salt_resistance', 'drought_resistance'}	7B:451352105-451355833	Triticum aestivum	unknown
TraesCS7B02G246300	5	{'grain_weight_increase', 'disease_resistance', 'drought_resistance', 'plant_height_reduce', 'salt_resistance'}	7B:455270029-455272474	Triticum aestivum	unknown
TraesCS7B02G249700	3	{'disease_resistance', 'salt_resistance', 'drought_resistance'}	7B:461206210-461207472	Triticum aestivum	unknown
TraesCS7B02G261800	2	{'salt_resistance', 'drought_resistance'}	7B:482237779-482248552	Triticum aestivum	unknown
TraesCS7B02G269600	2	{'salt_resistance', 'drought_resistance'}	7B:494434782-494435375	Triticum aestivum	unknown
TraesCS7B02G269700	2	{'salt_resistance', 'drought_resistance'}	7B:494581311-494587732	Triticum aestivum	unknown
TraesCS7B02G270800	2	{'disease_resistance', 'drought_resistance'}	7B:496656892-496658744	Triticum aestivum	unknown
TraesCS7B02G275800	2	{'salt_resistance', 'drought_resistance'}	7B:504962136-504964098	Triticum aestivum	unknown
TraesCS7B02G277900	2	{'salt_resistance', 'drought_resistance'}	7B:508656998-508661040	Triticum aestivum	unknown
TraesCS7B02G292000	3	{'disease_resistance', 'salt_resistance', 'drought_resistance'}	7B:528770912-528771982	Triticum aestivum	unknown
TraesCS7B02G309900	3	{'disease_resistance', 'salt_resistance', 'drought_resistance'}	7B:553883880-553888100	Triticum aestivum	unknown
TraesCS7B02G322200	2	{'salt_resistance', 'plant_height_reduce'}	7B:572932548-572934907	Triticum aestivum	unknown
TraesCS7B02G387600	3	{'disease_resistance', 'salt_resistance', 'drought_resistance'}	7B:653800238-653801354	Triticum aestivum	unknown
TraesCS7B02G388600	2	{'disease_resistance', 'salt_resistance'}	7B:654916137-654922553	Triticum aestivum	unknown
TraesCS7B02G405100	2	{'salt_resistance', 'drought_resistance'}	7B:673304408-673311644	Triticum aestivum	unknown
TraesCS7B02G408900	2	{'salt_resistance', 'drought_resistance'}	7B:678124719-678128411	Triticum aestivum	unknown
TraesCS7B02G418500	3	{'disease_resistance', 'salt_resistance', 'drought_resistance'}	7B:686886913-686888542	Triticum aestivum	unknown
TraesCS7B02G418600	3	{'disease_resistance', 'salt_resistance', 'drought_resistance'}	7B:686965452-686966443	Triticum aestivum	unknown
TraesCS7B02G419400	3	{'disease_resistance', 'salt_resistance', 'drought_resistance'}	7B:688163018-688164771	Triticum aestivum	unknown
TraesCS7B02G468200	2	{'salt_resistance', 'drought_resistance'}	7B:725517053-725520745	Triticum aestivum	unknown
TraesCS7B02G468300	2	{'salt_resistance', 'drought_resistance'}	7B:725522788-725527193	Triticum aestivum	unknown
TraesCS7B02G478700	2	{'disease_resistance', 'drought_resistance'}	7B:733750364-733753039	Triticum aestivum	unknown
TraesCS7D02G019000	2	{'disease_resistance', 'insect_resistance'}	7D:8353564-8356531	Triticum aestivum	unknown
TraesCS7D02G029700	3	{'disease_resistance', 'salt_resistance', 'drought_resistance'}	7D:14880405-14885109	Triticum aestivum	unknown
TraesCS7D02G037700	2	{'plant_height_reduce', 'insect_resistance'}	7D:19049652-19053785	Triticum aestivum	unknown
TraesCS7D02G042300	3	{'disease_resistance', 'salt_resistance', 'drought_resistance'}	7D:21653102-21668174	Triticum aestivum	unknown
TraesCS7D02G042600	3	{'disease_resistance', 'salt_resistance', 'drought_resistance'}	7D:21782663-21788172	Triticum aestivum	unknown
TraesCS7D02G044200	3	{'disease_resistance', 'grain_weight_increase', 'plant_height_reduce'}	7D:22586526-22589173	Triticum aestivum	unknown
TraesCS7D02G063300	2	{'grain_weight_increase', 'plant_height_reduce'}	7D:34444801-34447650	Triticum aestivum	unknown
TraesCS7D02G085900	2	{'disease_resistance', 'drought_resistance'}	7D:52829591-52832227	Triticum aestivum	unknown
TraesCS7D02G092300	3	{'disease_resistance', 'salt_resistance', 'drought_resistance'}	7D:55249830-55253911	Triticum aestivum	unknown
TraesCS7D02G092400	3	{'disease_resistance', 'salt_resistance', 'drought_resistance'}	7D:55267043-55271018	Triticum aestivum	unknown
TraesCS7D02G092500	3	{'disease_resistance', 'salt_resistance', 'drought_resistance'}	7D:55374377-55379413	Triticum aestivum	unknown
TraesCS7D02G092600	3	{'disease_resistance', 'salt_resistance', 'drought_resistance'}	7D:55387404-55392014	Triticum aestivum	unknown
TraesCS7D02G096300	2	{'disease_resistance', 'salt_resistance'}	7D:58500798-58504536	Triticum aestivum	unknown
TraesCS7D02G102700	2	{'salt_resistance', 'drought_resistance'}	7D:62190909-62197160	Triticum aestivum	unknown
TraesCS7D02G103100	2	{'salt_resistance', 'drought_resistance'}	7D:62940310-62942721	Triticum aestivum	unknown
TraesCS7D02G106400	3	{'disease_resistance', 'salt_resistance', 'drought_resistance'}	7D:64270551-64277804	Triticum aestivum	unknown
TraesCS7D02G106600	2	{'disease_resistance', 'plant_height_reduce'}	7D:64436698-64446546	Triticum aestivum	unknown
TraesCS7D02G106900	2	{'disease_resistance', 'plant_height_reduce'}	7D:64471702-64488450	Triticum aestivum	unknown
TraesCS7D02G114100	2	{'salt_resistance', 'drought_resistance'}	7D:69815233-69823208	Triticum aestivum	unknown
TraesCS7D02G114200	2	{'salt_resistance', 'drought_resistance'}	7D:69867607-69875984	Triticum aestivum	unknown
TraesCS7D02G114300	2	{'salt_resistance', 'drought_resistance'}	7D:69936681-69942549	Triticum aestivum	unknown
TraesCS7D02G115100	2	{'salt_resistance', 'drought_resistance'}	7D:70745497-70754564	Triticum aestivum	unknown
TraesCS7D02G115300	2	{'salt_resistance', 'drought_resistance'}	7D:70826255-70833932	Triticum aestivum	unknown
TraesCS7D02G115900	2	{'salt_resistance', 'drought_resistance'}	7D:71211224-71217924	Triticum aestivum	unknown
TraesCS7D02G116200	2	{'salt_resistance', 'drought_resistance'}	7D:71353691-71363523	Triticum aestivum	unknown
TraesCS7D02G116300	2	{'salt_resistance', 'drought_resistance'}	7D:71543576-71552110	Triticum aestivum	unknown
TraesCS7D02G117000	2	{'salt_resistance', 'drought_resistance'}	7D:72170415-72174308	Triticum aestivum	unknown
TraesCS7D02G153700	2	{'disease_resistance', 'salt_resistance'}	7D:101730086-101734282	Triticum aestivum	unknown
TraesCS7D02G153800	2	{'disease_resistance', 'salt_resistance'}	7D:101736527-101739826	Triticum aestivum	unknown
TraesCS7D02G158500	2	{'salt_resistance', 'drought_resistance'}	7D:106915520-106917944	Triticum aestivum	unknown
TraesCS7D02G166100	2	{'disease_resistance', 'plant_height_reduce'}	7D:116470060-116477893	Triticum aestivum	unknown
TraesCS7D02G166400	3	{'disease_resistance', 'grain_weight_increase', 'plant_height_reduce'}	7D:117132680-117134270	Triticum aestivum	unknown
TraesCS7D02G166700	2	{'salt_resistance', 'plant_height_reduce'}	7D:117463162-117465285	Triticum aestivum	unknown
TraesCS7D02G175600	2	{'salt_resistance', 'drought_resistance'}	7D:127649536-127651843	Triticum aestivum	unknown
TraesCS7D02G175700	2	{'salt_resistance', 'drought_resistance'}	7D:127681181-127683161	Triticum aestivum	unknown
TraesCS7D02G175800	2	{'salt_resistance', 'drought_resistance'}	7D:127699170-127700372	Triticum aestivum	unknown
TraesCS7D02G175900	2	{'salt_resistance', 'drought_resistance'}			unknown
TraesCS7D02G176000	2	{'salt_resistance', 'drought_resistance'}	7D:127764544-127766234	Triticum aestivum	unknown
TraesCS7D02G182700	2	{'salt_resistance', 'drought_resistance'}	7D:136203799-136205955	Triticum aestivum	unknown
TraesCS7D02G220000	3	{'disease_resistance', 'salt_resistance', 'drought_resistance'}	7D:180593068-180594188	Triticum aestivum	unknown
TraesCS7D02G246100	4	{'disease_resistance', 'grain_weight_increase', 'salt_resistance', 'plant_height_reduce'}	7D:215094578-215096664	Triticum aestivum	unknown
TraesCS7D02G265000	2	{'salt_resistance', 'drought_resistance'}	7D:246074131-246076185	Triticum aestivum	unknown
TraesCS7D02G265100	2	{'salt_resistance', 'drought_resistance'}	7D:246388255-246389551	Triticum aestivum	unknown
TraesCS7D02G267700	2	{'disease_resistance', 'salt_resistance'}	7D:251373395-251375719	Triticum aestivum	unknown
TraesCS7D02G270000	2	{'disease_resistance', 'drought_resistance'}	7D:255057487-255059348	Triticum aestivum	unknown
TraesCS7D02G283800	2	{'salt_resistance', 'drought_resistance'}	7D:296496924-296503641	Triticum aestivum	unknown
TraesCS7D02G328000	2	{'salt_resistance', 'drought_resistance'}	7D:419367017-419372320	Triticum aestivum	unknown
TraesCS7D02G339800	3	{'disease_resistance', 'salt_resistance', 'drought_resistance'}	7D:434146488-434150264	Triticum aestivum	unknown
TraesCS7D02G342300	5	{'grain_weight_increase', 'disease_resistance', 'drought_resistance', 'plant_height_reduce', 'salt_resistance'}	7D:438368227-438370721	Triticum aestivum	unknown
TraesCS7D02G345700	3	{'disease_resistance', 'salt_resistance', 'drought_resistance'}	7D:444351839-444353552	Triticum aestivum	unknown
TraesCS7D02G349200	3	{'disease_resistance', 'salt_resistance', 'drought_resistance'}	7D:449058166-449061266	Triticum aestivum	unknown
TraesCS7D02G353600	2	{'disease_resistance', 'salt_resistance'}	7D:457147088-457150955	Triticum aestivum	unknown
TraesCS7D02G356800	2	{'salt_resistance', 'drought_resistance'}	7D:459923113-459936250	Triticum aestivum	unknown
TraesCS7D02G364600	2	{'salt_resistance', 'drought_resistance'}	7D:470837323-470838275	Triticum aestivum	unknown
TraesCS7D02G364700	2	{'salt_resistance', 'drought_resistance'}	7D:470886580-470893028	Triticum aestivum	unknown
TraesCS7D02G365700	2	{'disease_resistance', 'drought_resistance'}	7D:472539654-472541850	Triticum aestivum	unknown
TraesCS7D02G372800	2	{'salt_resistance', 'drought_resistance'}	7D:483139680-483143432	Triticum aestivum	unknown
TraesCS7D02G373700	2	{'salt_resistance', 'drought_resistance'}	7D:484070434-484072754	Triticum aestivum	unknown
TraesCS7D02G378200	2	{'salt_resistance', 'drought_resistance'}	7D:489300878-489301717	Triticum aestivum	unknown
TraesCS7D02G403700	3	{'disease_resistance', 'salt_resistance', 'drought_resistance'}	7D:520827434-520832219	Triticum aestivum	unknown
TraesCS7D02G414700	3	{'disease_resistance', 'salt_resistance', 'drought_resistance'}	7D:532899361-532902472	Triticum aestivum	unknown
TraesCS7D02G414900	3	{'disease_resistance', 'salt_resistance', 'drought_resistance'}	7D:533432518-533434635	Triticum aestivum	unknown
TraesCS7D02G460200	2	{'disease_resistance', 'drought_resistance'}	7D:576894559-576896986	Triticum aestivum	unknown
TraesCS7D02G471400	3	{'disease_resistance', 'salt_resistance', 'drought_resistance'}	7D:585183235-585184673	Triticum aestivum	unknown
TraesCS7D02G485500	2	{'salt_resistance', 'drought_resistance'}	7D:595723291-595730838	Triticum aestivum	unknown
TraesCS7D02G488800	2	{'salt_resistance', 'drought_resistance'}	7D:598622780-598626944	Triticum aestivum	unknown
TraesCS7D02G497300	3	{'disease_resistance', 'salt_resistance', 'drought_resistance'}	7D:603847757-603849551	Triticum aestivum	unknown
TraesCS7D02G497400	3	{'disease_resistance', 'salt_resistance', 'drought_resistance'}	7D:603982418-603984529	Triticum aestivum	unknown
TraesCS7D02G497800	3	{'disease_resistance', 'salt_resistance', 'drought_resistance'}	7D:604530876-604532716	Triticum aestivum	unknown
TraesCS7D02G525100	3	{'disease_resistance', 'salt_resistance', 'drought_resistance'}	7D:620989956-620992337	Triticum aestivum	unknown
TraesCS7D02G531200	2	{'salt_resistance', 'drought_resistance'}	7D:625596372-625600094	Triticum aestivum	unknown
TraesCS7D02G531300	2	{'salt_resistance', 'drought_resistance'}	7D:625602891-625606876	Triticum aestivum	unknown
TraesCS7D02G543500	4	{'disease_resistance', 'salt_resistance', 'plant_height_reduce', 'drought_resistance'}	7D:631933665-631935693	Triticum aestivum	unknown
TraesCSU02G001200	3	{'disease_resistance', 'salt_resistance', 'drought_resistance'}	Un:1492282-1494726	Triticum aestivum	unknown
TraesCSU02G014100	2	{'salt_resistance', 'drought_resistance'}	Un:16898745-16906016	Triticum aestivum	unknown
TraesCSU02G019000	2	{'disease_resistance', 'salt_resistance'}	Un:20709392-20710422	Triticum aestivum	unknown
TraesCSU02G029900	2	{'disease_resistance', 'salt_resistance'}	Un:28572353-28574703	Triticum aestivum	unknown
TraesCSU02G047300	2	{'disease_resistance', 'salt_resistance'}	Un:37338311-37338931	Triticum aestivum	unknown
TraesCSU02G047400	2	{'disease_resistance', 'drought_resistance'}	Un:37381735-37399428	Triticum aestivum	unknown
TraesCSU02G058438	2	{'disease_resistance', 'drought_resistance'}	Un:45771082-45773544	Triticum aestivum	unknown
TraesCSU02G072500	2	{'disease_resistance', 'salt_resistance'}	Un:63290513-63296324	Triticum aestivum	unknown
TraesCSU02G085800	2	{'disease_resistance', 'drought_resistance'}	Un:76614006-76616232	Triticum aestivum	unknown
TraesCSU02G093100	2	{'salt_resistance', 'drought_resistance'}	Un:82523784-82532301	Triticum aestivum	unknown
TraesCSU02G095500	2	{'salt_resistance', 'drought_resistance'}	Un:84225148-84239890	Triticum aestivum	unknown
TraesCSU02G129500	3	{'disease_resistance', 'salt_resistance', 'drought_resistance'}	Un:110511363-110515475	Triticum aestivum	unknown
TraesCSU02G142500	3	{'disease_resistance', 'salt_resistance', 'drought_resistance'}	Un:143897980-143904148	Triticum aestivum	unknown
TraesCSU02G143100	3	{'disease_resistance', 'salt_resistance', 'drought_resistance'}	Un:146897471-146898576	Triticum aestivum	unknown
TraesCSU02G144000	3	{'disease_resistance', 'salt_resistance', 'drought_resistance'}	Un:154082647-154083752	Triticum aestivum	unknown
TraesCSU02G145400	2	{'salt_resistance', 'drought_resistance'}	Un:156674413-156678115	Triticum aestivum	unknown
TraesCSU02G152100	2	{'disease_resistance', 'plant_height_reduce'}	Un:188194088-188197922	Triticum aestivum	unknown
TraesCSU02G156700	2	{'disease_resistance', 'drought_resistance'}	Un:216296957-216303952	Triticum aestivum	unknown
TraesCSU02G159700	2	{'salt_resistance', 'drought_resistance'}	Un:226935440-226942322	Triticum aestivum	unknown
TraesCSU02G161800	3	{'disease_resistance', 'salt_resistance', 'drought_resistance'}	Un:233284534-233285433	Triticum aestivum	unknown
TraesCSU02G166700	2	{'salt_resistance', 'plant_height_reduce'}	Un:244205991-244207757	Triticum aestivum	unknown
TraesCSU02G171200	3	{'disease_resistance', 'salt_resistance', 'drought_resistance'}	Un:252346180-252346904	Triticum aestivum	unknown
TraesCSU02G175200	2	{'disease_resistance', 'salt_resistance'}	Un:263451466-263452136	Triticum aestivum	unknown
TraesCSU02G182900	2	{'salt_resistance', 'insect_resistance'}	Un:276526691-276530298	Triticum aestivum	unknown
TraesCSU02G183700	3	{'disease_resistance', 'salt_resistance', 'drought_resistance'}	Un:277361437-277362587	Triticum aestivum	unknown
TraesCSU02G194600	2	{'disease_resistance', 'salt_resistance'}	Un:291905876-291906331	Triticum aestivum	unknown
TraesCSU02G223100	2	{'salt_resistance', 'drought_resistance'}	Un:329447393-329449430	Triticum aestivum	unknown
TraesCSU02G238700	2	{'disease_resistance', 'drought_resistance'}	Un:354551652-354553683	Triticum aestivum	unknown
TraesCSU02G264200	3	{'disease_resistance', 'salt_resistance', 'drought_resistance'}	Un:427196612-427197399	Triticum aestivum	unknown
Zm00001d000080	3	{'disease_resistance', 'salt_resistance', 'drought_resistance'}	3:424253-432042	Zea mays	unknown
Zm00001d000110	2	{'disease_resistance', 'drought_resistance'}	4:214164318-214169267	Zea mays	unknown
Zm00001d000407	3	{'disease_resistance', 'salt_resistance', 'drought_resistance'}	9:95704652-95716503	Zea mays	unknown
Zm00001d001988	3	{'disease_resistance', 'salt_resistance', 'drought_resistance'}	2:4263163-4267472	Zea mays	unknown
Zm00001d002039	2	{'disease_resistance', 'drought_resistance'}	2:5129615-5132605	Zea mays	unknown
Zm00001d002065	3	{'disease_resistance', 'salt_resistance', 'drought_resistance'}	2:5495831-5499321	Zea mays	unknown
Zm00001d002085	2	{'salt_resistance', 'drought_resistance'}	2:6028082-6031409	Zea mays	unknown
Zm00001d002167	3	{'disease_resistance', 'salt_resistance', 'drought_resistance'}	2:7347015-7349290	Zea mays	unknown
Zm00001d002168	2	{'disease_resistance', 'salt_resistance'}	2:7351939-7355206	Zea mays	unknown
Zm00001d002172	3	{'disease_resistance', 'salt_resistance', 'drought_resistance'}	2:7373696-7381776	Zea mays	unknown
Zm00001d002173	2	{'disease_resistance', 'salt_resistance'}	2:7455732-7457858	Zea mays	unknown
Zm00001d002178	3	{'disease_resistance', 'salt_resistance', 'drought_resistance'}			unknown
Zm00001d002275	2	{'salt_resistance', 'drought_resistance'}	2:9566685-9578502	Zea mays	unknown
Zm00001d002357	2	{'disease_resistance', 'drought_resistance'}	2:11044460-11048972	Zea mays	unknown
Zm00001d002503	2	{'salt_resistance', 'drought_resistance'}	2:14407950-14415642	Zea mays	unknown
Zm00001d002533	2	{'salt_resistance', 'drought_resistance'}	2:15139417-15140039	Zea mays	unknown
Zm00001d002540	2	{'disease_resistance', 'salt_resistance'}	2:15241712-15246476	Zea mays	unknown
[truncated: 525 more rows]
